# Supplementary material
Source: publisher figshare collection journal article supplement (https://diabetesjournals.figshare.com/articles/dataset/_/21295908)
Supplement: Supplementary file 1 [file 1]

## Sheet: Supp.Table1.Pheno_Summary
Supplement Table 1. Summary of phenotypes, RNASEQ and transformation, covariates
Abb	Phenotype	Description	Unit	Number.of.rats	Transformation	Covariates	Heritability(SE)
BW	Body weight	Body weight at Insulin test at 16 weeks of age	grams (g)	1519	RINT	NA	0.54 (0.036)
BWGain	Body Weight Gained	Body weight gain from 16 weeks of age until sacrifice at 17 weeks of age	grams (g)	1142	RINT	NA	0.18 (0.038)
BLTail	Body Length Tail	Body length with tail at sacrifice	centimeter (cm)	1134	RINT	Dissector	0.38 (0.042)
BLNoTail	Body length No Tail	Body length without tail at sacrifice	centimeter (cm)	1134	RINT	Dissector	0.22 (0.039)
EpiFat	EpiFat	Epididymal fat pad weight	grams (g)	1141	RINT	Dissector	0.58 (0.037)
EpiFat/BW	Adjusted EpiFat	Epididymal fat pad weight/body weight at sacrified	fraction (g/g)	1141	RINT	Dissector	0.6 (0.038)
RetroFat	RetroFat	Retroperitoneal fat pad weight	grams (g)	1141	RINT	NA	0.6 (0.037)
RetroFat/BW	Adjusted RetroFat	Retroperitoneal fat pad weight/body weight at sacrified	fraction (g/g)	1142	RINT	NA	0.58 (0.039)
QUICKI	QUICKI	Quantitative insulin sensitive check	1/[log(fasting insulin) + log (fasting glucose)]	1400	RINT	Handler	0.32 (0.04)
Ins0	Fasting Insulin	Fasting Insulin	ng/ml	1400	RINT	number,Handler	0.31 (0.04)
InsAUC	Insulin AUC	Insulin under the curve	Area under the curve (AUC)	1370	RINT	Bleeder,Injector	0.29 (0.039)
Gluc0	Fasting Glucose	Fasting Glucose	mg/dL	1517	RINT	Color,Handler	0.35 (0.037)
GluAUC	Glucose AUC	Glucose under the curve	Area under the curve (AUC)	1514	TRINT	number	0.36 (0.037)
CHOL	Fasting Cholesterol	Fasting Cholesterol	mg/dL	1137	log	HarvestNumber	0.44 (0.044)
TRIG	Fasting Triglyceride	Fasting Triglyceride	mg/dL	1137	log	NA	0.42 (0.045)
WPIC	Pancreas Insulin Content	Whole pancreas insulin content	ug/g	1003	RINT	NA	0.31 (0.053)
Pancreas/BW	Pancreas Weight/sacBW	Pancreas weight/body weight at sacrifice	fraction (g/g)	1127	RINT	NA	0.51 (0.042)
Heart/BW	Heart Weight/sacBW	Heart weight/body weight at sacrifice	fraction (g/g)	979	RINT	NA	0.43 (0.046)
RigKid/BW	Right Kidney/sacBW	Right kidney weight/body weight at sacrified	fraction (g/g)	373	RINT	NA	0.32 (0.086)
LftKid/BW	Left Kidney/sacBW	Left kidney weight/body weight at sacrified	fraction (g/g)	374	RINT	NA	0.37 (0.087)
TotKid/BW	Total Kidney/sacBW	Both kidney weight/body weight at sacrifice	fraction (g/g)	372	RINT	NA	0.48 (0.089)
Tissue	Number of rats	Sequenced	Transformation	Covariates			B-H FDR
Liver	430	37 kb paired end	RINT	batch, RIN, first PC from expression, first 10 PCs from genotype			0.00024
Adipose	415	75 kb single end	RINT	batch, nerve, muscle, first PC from expression, first 10 PCs from genotype			0.00028

## Sheet: Supp.Table2.Pheno_raw 
Supplement Table 2. Raw phenotype
Rat ID	Family	Tissue.Harvest.Age	Color	Handler	number	Bleeder	Injector	Dissector	HarvestNumber	CHOL	TRIG	BWGain	BW	EpiFat	EpiFatg/BW	Gluc0	GluAUC	Heart/BW	Ins0	InsAUC	LftKid/BW	WPIC	Pancreas/BW	QUICKI	RetroFat	RetroFat/BW	RigKid/BW	BLNoTail	BLTail	TotKid/BW
41736_3	21	17weeks	Black	Murielle	7	Leah	Leah	Leah	6	111.5	116	75	315	5.92	0.0151795	102	10702.5	NA	NA	NA	NA	NA	NA	NA	5.25	0.0134615	NA	20.3	40.6	NA
41761_4	7	17weeks	NA	Murielle	10	Leah	Leah	Leah	9	78	68.5	40	339	5.11	0.0134828	108	12180	NA	NA	NA	NA	NA	NA	NA	4.72	0.0124538	NA	20.3	16.5	NA
41761_5	7	17weeks	NA	Murielle	1	Leah	Leah	Leah	10	89.5	93	9	336	4.5	0.0130435	91	10207.5	NA	0.147	64.6425	NA	NA	NA	0.887817	4.44	0.0128696	NA	21.6	15.5	NA
41762_3	16	17weeks	Black	Murielle	2	Leah	Leah	Leah	1	76	56	-82	325	4.86	0.02	91	9667.5	NA	0.329	NA	NA	NA	NA	0.677398	2.85	0.0117284	NA	20.3	38.1	NA
41762_4	16	17weeks	Black	Murielle	3	Leah	Leah	Leah	2	92.5	90	25	302	4.43	0.0135474	89	12840	NA	0.196	92.7075	NA	NA	NA	0.805382	4.8	0.0146789	NA	21.6	38.1	NA
41762_5	16	17weeks	Black	Murielle	4	Leah	Leah	Leah	3	70	61.5	28	283	3.75	0.0120579	84	11812.5	NA	0.114	122.317	NA	NA	NA	1.01918	3.34	0.0107395	NA	21.6	15.5	NA
41763_1	15	17weeks	Black	Murielle	6	Leah	Leah	Leah	6	71.5	85	15	364	6.87	0.0181266	90	12435	NA	0.93	332.183	NA	NA	NA	0.520095	5.55	0.0146438	NA	22.9	45.2	NA
41763_2	15	17weeks	Black	Murielle	7	Leah	Leah	Leah	7	87.5	111	3	373	7.75	0.0206117	100	13132.5	NA	1.081	391.493	NA	NA	NA	0.491684	4.81	0.0127926	NA	21.6	40.6	NA
41763_3	15	17weeks	Black	Murielle	8	Leah	Leah	Leah	8	57	73	2	298	4.58	0.0152667	96	11887.5	NA	0.659	209.542	NA	NA	NA	0.555199	3.15	0.0105	NA	20.3	38.1	NA
41767_3	11	17weeks	Black.Hood	Murielle	5	Leah	Leah	Leah	4	57.5	69.5	-92	378	3.35	0.0117133	85	11910	NA	0.201	NA	NA	NA	NA	0.811283	2.62	0.00916084	NA	20.3	38.1	NA
41767_4	11	17weeks	Black	Murielle	6	Leah	Leah	Leah	5	81	63.5	-12	389	3.7	0.00981432	87	10365	NA	0.499	147.502	NA	NA	NA	0.610642	3.43	0.00909814	NA	20.3	15.5	NA
41770_3	8	17weeks	Black	Murielle	2	Leah	Leah	Leah	2	90.5	68	6	319	3.69	0.0113538	91	11520	NA	0.358	127.267	NA	NA	NA	0.660972	2.49	0.00766154	NA	20.3	38.1	NA
41770_4	8	17weeks	Albino	Murielle	3	Leah	Leah	Leah	3	65.5	111.5	16	329	3.84	0.0111304	90	10320	NA	0.391	67.035	NA	NA	NA	0.646655	5.03	0.0145797	NA	20.3	15.5	NA
41770_5	8	17weeks	Black.Hood	Murielle	4	Leah	Leah	Leah	4	72	96.5	16	310	3.95	0.0121166	95	10042.5	NA	0.442	166.477	NA	NA	NA	0.616088	3.5	0.0107362	NA	19.1	38.1	NA
41770_6	8	17weeks	Black.Hood	Murielle	5	Leah	Leah	Leah	5	73	71	9	348	3.76	0.0105322	94	13702.5	NA	0.298	163.14	NA	NA	NA	0.690921	3.32	0.00929972	NA	20.3	40.6	NA
41774_3	9	17weeks	Brown.Hood	Murielle	1	Leah	Leah	Leah	1	84	103.5	11	360	6.2	0.0167116	85	9585	NA	1.063	186.075	NA	NA	0.00185984	0.51126	5.45	0.01469	NA	21.6	15.5	NA
41774_4	9	17weeks	Brown	Murielle	2	Leah	Leah	Leah	2	63	66.5	4	336	3.05	0.00897059	92	10117.5	NA	0.403	147.075	NA	NA	0.00194118	0.637311	2.35	0.00691176	NA	21.6	40.6	NA
41774_5	9	17weeks	Brown.Hood	Murielle	3	Leah	Leah	Leah	3	70	163	6	310	3.8	0.0120253	92	10897.5	NA	0.766	155.475	NA	NA	0.00221519	0.541121	3.49	0.0110443	NA	20.3	40.6	NA
41774_6	9	17weeks	Brown.Hood	Murielle	4	Leah	Leah	Leah	4	58	115.5	4	298	4.57	0.0151325	98	9877.5	NA	1.022	NA	NA	NA	0.00175497	0.499831	3.58	0.0118543	NA	20.3	36.8	NA
41776_3	13	17weeks	Black	Murielle	1	Leah	Leah	Leah	1	91.5	110.5	4	300	3.73	0.0122697	88	11317.5	NA	0.557	130.507	NA	NA	0.00213816	0.591598	3.14	0.0103289	NA	19.1	36.8	NA
41776_4	13	17weeks	Black	Murielle	2	Leah	Leah	Leah	2	82	55	11	315	4.07	0.0124847	81	10522.5	NA	0.66	152.745	NA	NA	0.00236196	0.578694	3.94	0.0120859	NA	20.3	38.1	NA
41776_5	13	17weeks	Black	Murielle	3	Leah	Leah	Leah	3	114.5	106	-5	310	3.73	0.0122295	83	10665	NA	0.844	223.463	NA	NA	0.00206557	0.541882	2.7	0.00885246	NA	NA	NA	NA
41776_6	13	17weeks	Black	Murielle	4	Leah	Leah	Leah	4	65.5	43.5	3	285	4.13	0.0143403	87	11265	NA	0.465	169.148	NA	NA	0.00201389	0.622288	2.89	0.0100347	NA	17.8	35.6	NA
41777_1	12	17weeks	Albino	Murielle	9	Leah	Leah	Leah	9	72	59.5	2	285	3.39	0.0118118	83	9397.5	NA	1.165	190.245	NA	NA	0.00247387	0.503676	3.03	0.0105575	NA	20.3	36.8	NA
41777_2	12	17weeks	Black.Hood	Murielle	10	Leah	Leah	Leah	10	64	62.5	4	326	3.52	0.0106667	93	10905	NA	0.403	147.075	NA	NA	0.00178788	0.63541	3.74	0.0113333	NA	20.3	38.1	NA
41779_3	14	17weeks	Black	Murielle	5	Leah	Leah	Leah	5	76	62	6	255	3.63	0.013908	85	8977.5	NA	0.939	NA	NA	NA	0.00222222	0.525739	2.56	0.00980843	NA	19.1	34.3	NA
41779_4	14	17weeks	Albino	Murielle	6	Leah	Leah	Leah	6	65.5	53	9	311	3.27	0.0102188	85	12292.5	NA	1.097	217.065	NA	NA	0.00203125	0.507711	2.68	0.008375	NA	21.6	38.1	NA
41779_5	14	17weeks	Black	Murielle	7	Leah	Leah	Leah	7	64.5	57.5	-5	257	3.13	0.0124206	83	8827.5	NA	0.662	NA	NA	NA	0.00230159	0.574734	2.89	0.0114683	NA	17.8	33	NA
41779_6	14	17weeks	Albino	Murielle	8	Leah	Leah	Leah	8	67	63.5	0	298	NA	NA	91	10117.5	NA	1.007	167.73	NA	NA	0.00248322	0.509666	2.97	0.00996644	NA	20.3	36.8	NA
41816_1	16	17weeks	Black	Murielle	1	Leah	Leah	Leah	1	68	101.5	14	346	3.63	0.0100833	90	11152.5	NA	0.815	173.903	NA	NA	0.00186111	0.536078	3.5	0.00972222	NA	NA	NA	NA
41816_2	16	17weeks	Black	Murielle	2	Leah	Leah	Leah	2	81.5	83.5	-3	376	4.67	0.0125201	86	12202.5	NA	1.123	207.825	NA	NA	0.0022252	0.503809	4.3	0.0115282	NA	20.3	38.1	NA
41816_3	16	17weeks	Brown	Murielle	3	Leah	Leah	Leah	3	80.5	193	6	360	6.35	0.0173497	97	12135	NA	0.85	264.42	NA	NA	0.00210383	0.521869	4.85	0.0132514	NA	21.6	15.5	NA
42114_1	4	17weeks	Brown	Murielle	5	Leah	Leah	Leah	5	59	58.5	-7	355	3.25	0.00933908	87	12517.5	NA	0.744	200.715	NA	NA	0.00229885	0.552153	2.6	0.00747126	NA	21.6	15.5	NA
42114_2	4	17weeks	Black	Murielle	6	Leah	Leah	Leah	6	69	117.5	-3	334	3.74	0.0112991	88	12285	NA	0.83	212.498	NA	NA	0.00175227	0.536607	4.16	0.012568	NA	21.6	38.1	NA
42275_2	3	17weeks	Black.Hood	Murielle	8	Leah	Leah	Leah	8	88.5	62.5	8	326	3.24	0.0097006	85	10117.5	NA	0.597	NA	NA	NA	0.00248503	0.586375	1.98	0.00592814	NA	20.3	15.5	NA
42276_1	20	17weeks	Black.Hood	Murielle	9	Leah	Leah	Leah	9	101.5	68.5	11	384	5.64	0.0142785	91	9840	NA	1.233	289.05	NA	NA	0.00217722	0.487804	5.71	0.0144557	NA	21.6	38.1	NA
42276_2	20	17weeks	Brown.Hood	Murielle	10	Leah	Leah	Leah	10	87	78	7	375	6.05	0.0158377	98	10477.5	NA	0.639	155.895	NA	NA	0.00198953	0.556568	4.93	0.0129058	NA	20.3	38.1	NA
42414_1	1	17weeks	Brown.Hood	Murielle	4	Leah	Leah	Leah	4	95	110.5	12	388	8.14	0.02035	92	9742.5	NA	0.896	NA	NA	NA	0.00205	0.521895	7.4	0.0185	NA	22.9	40.6	NA
42414_2	1	17weeks	Black.Hood	Murielle	5	Leah	Leah	Leah	5	68	90	11	367	5.74	0.0151852	91	12510	NA	0.776	200.175	NA	NA	0.00216931	0.540861	4.85	0.0128307	NA	22.9	40.6	NA
42607_1	10	17weeks	Albino	Murielle	7	Leah	Leah	Leah	7	88.5	75.5	-1	394	9.34	0.0237659	90	11152.5	NA	2.302	393.562	NA	NA	0.00208651	0.431714	5.95	0.0151399	NA	22.9	40.6	NA
42607_3	10	17weeks	Black	Murielle	9	Leah	Leah	Leah	9	68	117	5	368	8.85	0.0237265	92	13852.5	NA	1.141	238.102	NA	NA	0.00150134	0.494787	6.49	0.0173995	NA	NA	NA	NA
42610_1	7	17weeks	Black.Hood	Nancy	1	Leah	Leah	Leah	1	66.5	45	3	352	4.81	0.0135493	88	13065	NA	0.425	142.875	NA	NA	0.00166197	0.63578	3	0.0084507	NA	NA	NA	NA
42610_2	7	17weeks	Black	Nancy	2	Leah	Leah	Leah	2	71.5	56.5	0	328	5.45	0.0166159	85	9345	NA	0.416	NA	NA	NA	0.00198171	0.645781	3.73	0.011372	NA	17.8	38.1	NA
42610_3	7	17weeks	Black.Hood	Nancy	3	Leah	Leah	Leah	3	63	55	10	353	5.07	0.0139669	80	8737.5	NA	0.539	150.105	NA	NA	0.00173554	0.611741	3.65	0.0100551	NA	20.3	38.1	NA
42610_4	7	17weeks	Black	Nancy	4	Leah	Leah	Leah	4	66.5	62.5	-7	352	19.12	0.0554203	92	9330	NA	0.509	NA	NA	NA	0.00173913	0.598621	5.38	0.0155942	NA	21.6	40.6	NA
42610_5	7	17weeks	Black.Hood	Nancy	5	Leah	Leah	Leah	5	81	59	1	365	5.95	0.0162568	92	12307.5	NA	0.564	245.325	NA	NA	0.00166667	0.583068	5	0.0136612	NA	20.3	38.1	NA
42610_7	7	17weeks	Black.Hood	Nancy	7	Leah	Leah	Leah	7	68	60	4	374	4.75	0.0125661	84	11655	NA	0.35	127.62	NA	NA	0.00195767	0.681038	3.11	0.00822751	NA	21.6	38.1	NA
42706_1	5	17weeks	Black	Max	5	Leah	Leah	Leah	5	123.5	152	11	413	7.74	0.0182547	90	12855	NA	1.613	329.332	NA	NA	0.00129717	0.462561	7.83	0.018467	NA	20.3	15.5	NA
42706_2	5	17weeks	Black.Hood	Max	6	Leah	Leah	Leah	6	111.5	110	10	345	5.84	0.0164507	99	12240	NA	0.802	183.405	NA	NA	0.00188732	0.526369	4.65	0.0130986	NA	20.3	38.1	NA
42706_3	5	17weeks	Black.Hood	Max	7	Leah	Leah	Leah	7	119	106.5	10	397	6.03	0.0148157	97	12292.5	NA	2.069	310.83	NA	NA	0.00181818	0.434304	5.4	0.0132678	NA	21.6	40.6	NA
42804_1	12	17weeks	Black.Hood	Max	2	Leah	Leah	Leah	2	114.5	169	-2	315	3.63	0.0115974	101	11932.5	NA	1.199	248.685	NA	NA	0.00210863	0.480044	3.88	0.0123962	NA	20.3	38.1	NA
42804_2	12	17weeks	Black.Hood	Max	3	Leah	Leah	Leah	3	88.5	114	10	349	6.1	0.0169916	99	11482.5	NA	1.249	256.785	NA	NA	0.00175487	0.477966	4.3	0.0119777	NA	20.3	15.5	NA
43054_1	16	17weeks	Brown	Max	3	Leah	Leah	Leah	3	70	163	-1	354	4.68	0.0132578	98	11647.5	NA	0.854	236.61	NA	NA	0.00192635	0.520106	4.35	0.0123229	NA	21.6	40.6	NA
43054_3	16	17weeks	Brown	Max	5	Leah	Leah	Leah	5	80	122	0	380	6.85	0.0180263	102	11805	NA	1.26	258.577	NA	NA	0.00139474	0.474165	6.05	0.0159211	NA	NA	NA	NA
43054_4	16	17weeks	Black	Max	6	Leah	Leah	Leah	6	70.5	130.5	1	373	6.05	0.0161765	97	11955	NA	0.67	201.885	NA	NA	0.00165775	0.551619	6.4	0.0171123	NA	NA	NA	NA
43056_1	13	17weeks	Black	Max	1	Leah	Leah	Leah	1	95	159.5	5	350	6.77	0.0190704	92	10642.5	NA	1.094	173.865	NA	NA	0.0016338	0.4993	5.75	0.0161972	NA	20.3	38.1	NA
43056_2	13	17weeks	Black	Max	2	Leah	Leah	Leah	2	84.5	92.5	3	356	5.55	0.0154596	87	11295	NA	0.98	198.262	NA	NA	0.00189415	0.517935	4.54	0.0126462	NA	21.6	40.6	NA
43057_1	4	17weeks	Black	Max	7	Leah	Leah	Leah	7	59.5	55.5	7	366	4.78	0.012815	91	11557.5	NA	0.799	247.185	NA	NA	0.00190349	0.537176	4.55	0.0121984	NA	21.6	38.1	NA
43057_2	4	17weeks	Brown	Max	8	Leah	Leah	Leah	8	68.5	48.5	2	327	3.28	0.0099696	91	9570	NA	0.686	149.287	NA	NA	0.00164134	0.55699	2.9	0.00881459	NA	19.1	36.8	NA
43057_4	4	17weeks	Brown	Max	10	Leah	Leah	Leah	10	61.5	59	8	338	4.26	0.0123121	87	10995	NA	0.443	132.841	NA	NA	0.00179191	0.630548	3.68	0.0106358	NA	20.3	38.1	NA
43852_1	21	17weeks	Black	Nancy	8	Leah	Leah	Leah	8	78.5	73	14	362	5.22	0.013883	92	11887.5	NA	1.102	204.053	NA	NA	0.00180851	0.498512	4.96	0.0131915	NA	21.6	40.6	NA
43855_1	5	17weeks	Black	Nancy	5	Leah	Leah	Leah	5	78	80.5	18	354	7.16	0.0192473	92	12585	NA	1.281	273.592	NA	NA	0.00177419	0.48278	4.29	0.0115323	NA	20.3	38.1	NA
43855_2	5	17weeks	Black.Hood	Nancy	6	Leah	Leah	Leah	6	114.5	115	7	410	8.05	0.0193046	94	13575	NA	1.227	369.022	NA	NA	0.00127098	0.484973	6.76	0.016211	NA	20.3	38.1	NA
43856_1	4	17weeks	Brown	Nancy	7	Leah	Leah	Leah	7	57.5	52.5	4	300	2.65	0.00871711	86	11955	NA	0.965	152.505	NA	NA	0.00217105	0.521098	2.81	0.00924342	NA	20.3	38.1	NA
43860_1	13	17weeks	Black	Nancy	9	Leah	Leah	Leah	9	68.5	70.5	9	291	4.23	0.0141	86	10650	NA	1.102	260.94	NA	NA	0.00196667	0.505899	2.9	0.00966667	NA	17.8	35.6	NA
43860_2	13	17weeks	Black	Nancy	10	Leah	Leah	Leah	10	77.5	67	2	302	4.09	0.0134539	86	10372.5	NA	0.97	197.077	NA	NA	0.00197368	0.520489	3.1	0.0101974	NA	20.3	36.8	NA
43861_1	15	17weeks	Black.Hood	Nancy	1	Leah	Leah	Leah	1	77	136.5	12	360	7.93	0.0213172	87	12675	NA	1.008	NA	NA	NA	0.00169355	0.514673	5.23	0.0140591	NA	20.3	38.1	NA
43861_2	15	17weeks	Brown.Hood	Nancy	2	Leah	Leah	Leah	2	65.5	96	15	360	6.29	0.0167733	90	13875	NA	1.015	336.457	NA	NA	0.00192	0.51002	3.22	0.00858667	NA	20.3	38.1	NA
43861_3	15	17weeks	Black	Nancy	3	Leah	Leah	Leah	3	81	114.5	10	300	4.53	0.0146129	92	10822.5	NA	1.322	259.928	NA	NA	0.00180645	0.479612	3.27	0.0105484	NA	17.8	34.3	NA
43861_4	15	17weeks	Black.Hood	Nancy	4	Leah	Leah	Leah	4	89	127.5	9	310	6.91	0.0216614	90	11610	NA	1.118	372.705	NA	NA	0.00191223	0.49933	4.25	0.0133229	NA	17.8	35.6	NA
43875_3	2	17weeks	Black	Jaime	7	Leah	Leah	Leah	7	84.5	60.5	7	345	4.58	0.0130114	86	12427.5	NA	0.922	140.243	NA	NA	0.00150568	0.526529	4.58	0.0130114	NA	19.1	36.8	NA
43879_1	9	17weeks	Brown	Nancy	1	Leah	Leah	Leah	1	85	208	0	315	5.72	0.0181587	104	10995	NA	1.271	259.365	NA	NA	0.0015873	0.471436	4.18	0.0132698	NA	19.1	35.6	NA
43879_2	9	17weeks	Brown.Hood	Nancy	2	Leah	Leah	Leah	2	87.5	200	0	293	4.33	0.0147782	100	12142.5	NA	1.01	311.603	NA	NA	0.00191126	0.498922	3.05	0.0104096	NA	19.1	36.8	NA
43879_3	9	17weeks	Brown	Nancy	3	Leah	Leah	Leah	3	67	102	6	348	5.51	0.015565	98	11490	NA	1.455	326.67	NA	NA	0.00169492	0.464233	3.92	0.0110734	NA	20.3	38.1	NA
43880_1	10	17weeks	Albino	Nancy	5	Leah	Leah	Leah	5	96	105.5	1	334	6.15	0.0183582	99	12997.5	NA	1.074	184.08	NA	NA	0.00185075	0.493428	4.8	0.0143284	NA	21.6	38.1	NA
43880_3	10	17weeks	Brown	Nancy	7	Leah	Leah	Leah	7	88.5	88.5	-2	295	5.02	0.0171331	99	13305	NA	0.651	248.768	NA	NA	0.00143345	0.552726	3.42	0.0116724	NA	19.1	35.6	NA
43880_4	10	17weeks	Black.Hood	Nancy	8	Leah	Leah	Leah	8	109	89	-6	360	4.78	0.0135028	106	12577.5	NA	0.736	219.923	NA	NA	0.0020339	0.52849	3.19	0.0090113	NA	20.3	38.1	NA
43889_3	21	17weeks	Black	Nancy	9	Leah	Leah	Leah	9	87	120.5	7	350	5.92	0.0165826	95	14220	NA	1.357	329.947	NA	NA	0.00182073	0.473865	8.55	0.0239496	NA	20.3	38.1	NA
43986_1	16	17weeks	Brown	Jaime	1	Leah	Leah	Leah	1	75.5	127.5	8	335	5.92	0.0172595	97	12292.5	NA	2.564	270.54	NA	NA	0.00166181	0.417416	5.25	0.0153061	NA	20.3	38.1	NA
43986_2	16	17weeks	Black	Jaime	2	Leah	Leah	Leah	2	66	168.5	9	360	6.05	0.0163957	93	9765	NA	1.925	NA	NA	NA	0.00165312	0.44387	6.05	0.0163957	NA	20.3	38.1	NA
43988_3	14	17weeks	Albino	Jaime	5	Leah	Leah	Leah	5	62.5	60.5	-3	315	2.52	0.00807692	76	10837.5	NA	0.966	186.278	NA	NA	0.00198718	0.535966	2.08	0.00666667	NA	17.8	35.6	NA
43988_4	14	17weeks	Black.Hood	Jaime	6	Leah	Leah	Leah	6	78	83.5	-2	310	3.8	0.0123377	88	11407.5	NA	1.198	236.678	NA	NA	0.00204545	0.49433	3.81	0.0123701	NA	19.1	35.6	NA
44077_3	5	17weeks	Black	Jaime	3	Leah	Leah	Leah	3	81	99	11	360	5.97	0.0160916	87	10815	NA	2.03	283.59	NA	NA	0.00150943	0.445035	4.17	0.0112399	NA	20.3	38.1	NA
44077_4	5	17weeks	Black.Hood	Jaime	4	Leah	Leah	Leah	4	98	128.5	13	330	7.13	0.0207872	94	11317.5	NA	1.147	279.465	NA	NA	0.00163265	0.491959	5.36	0.0156268	NA	20.3	38.1	NA
44080_3	4	17weeks	Black	Jaime	9	Leah	Leah	Leah	9	57	55.5	16	330	3.21	0.00927746	84	10132.5	NA	1.224	166.643	NA	NA	0.00199422	0.497003	3	0.00867052	NA	19.1	36.8	NA
44080_4	4	17weeks	Brown	Jaime	10	Leah	Leah	Leah	10	51	49	0	325	3.21	0.00987692	78	10957.5	NA	0.708	143.947	NA	NA	0.00224615	0.574011	3.2	0.00984615	NA	19.1	NA	NA
44787_1	8	17weeks	Black.Hood	Nancy	1	Leah	Leah	Leah	1	71.5	58.5	2	295	2.1	0.00707071	84	9952.5	NA	1.111	262.072	NA	NA	0.00225589	0.507616	1.9	0.00639731	NA	17.8	35.6	NA
44789_1	12	17weeks	Black.Hood	Nancy	3	Leah	Leah	Leah	3	90.5	73	7	346	4.91	0.0139093	88	11047.5	NA	1.268	301.005	NA	NA	0.00135977	0.488376	4.07	0.0115297	NA	20.3	38.1	NA
44789_2	12	17weeks	Black.Hood	Nancy	4	Leah	Leah	Leah	4	77.5	65.5	8	300	3.22	0.0104545	91	10762.5	NA	1.687	331.755	NA	NA	0.00217532	0.457424	3.29	0.0106818	NA	19.1	36.8	NA
44790_1	14	17weeks	Black	Nancy	5	Leah	Leah	Leah	5	74	81.5	2	300	3.2	0.010596	77	8670	NA	1.539	301.395	NA	NA	0.00182119	0.482223	3.48	0.0115232	NA	17.8	35.6	NA
44790_2	14	17weeks	Albino	Nancy	6	Leah	Leah	Leah	6	75	87.5	2	296	2.98	0.01	84	9757.5	NA	1.002	181.012	NA	NA	0.00211409	0.519441	3.5	0.011745	NA	17.8	35.6	NA
44791_3	6	17weeks	Brown	Nancy	7	Leah	Leah	Leah	7	73.5	70	-3	304	4.25	0.0141196	89	9967.5	NA	0.843	168.195	NA	NA	0.00199336	0.533271	2.9	0.00963455	NA	20.3	38.1	NA
44792_1	2	17weeks	Brown	Nancy	8	Leah	Leah	Leah	8	93.5	89.5	8	379	6.96	0.0179845	96	12607.5	NA	0.757	253.387	NA	NA	0.00167959	0.53724	6.18	0.015969	NA	NA	NA	NA
44935_1	11	17weeks	Black	Nancy	9	Leah	Leah	Leah	9	88.5	107	6	349	5.74	0.016169	92	9937.5	NA	1.793	278.678	NA	NA	0.00194366	0.450985	4.16	0.0117183	NA	19.1	36.8	NA
44938_1	3	17weeks	Black	Nancy.Jaime	1	Leah	Leah	Leah	1	83.5	111	-2	349	2.82	0.0081268	88	10522.5	NA	0.446	179.64	NA	NA	0.0025072	0.627424	1.6	0.00461095	NA	20.3	38.1	NA
44939_1	17	17weeks	Brown.Hood	Nancy.Jaime	2	Leah	Leah	Leah	2	101	68	4	354	3.83	0.0106983	98	13515	NA	0.467	143.025	NA	NA	0.00201117	0.602213	2.63	0.00734637	NA	20.3	38.1	NA
44940_1	18	17weeks	Black.Hood	Nancy.Jaime	3	Leah	Leah	Leah	3	88	153	2	368	8.28	0.0223784	100	9922.5	NA	1.881	288.135	NA	NA	0.00143243	0.439679	5.62	0.0151892	NA	20.3	38.1	NA
44940_2	18	17weeks	Brown.Hood	Nancy.Jaime	4	Leah	Leah	Leah	4	91.5	129	0	354	5.87	0.0165819	100	12337.5	NA	1.353	269.835	NA	NA	0.00211864	0.469198	4.34	0.0122599	NA	21.6	38.1	NA
45337_2	19	17weeks	Brown.Hood	Nancy.Jaime	6	Leah	Leah	Leah	6	65	66.5	14	427	6.41	0.0145351	94	13230	NA	0.814	196.132	NA	NA	0.00156463	0.530855	6.27	0.0142177	NA	22.9	40.6	NA
45338_1	22	17weeks	Black.Hood	Nancy.Jaime	9	Leah	Leah	Leah	9	87.5	214.5	10	448	8.28	0.0180786	107	13432.5	NA	2.665	283.98	NA	NA	0.00117904	0.407319	14.76	0.0322271	NA	21.6	38.1	NA
45338_2	22	17weeks	Black.Hood	Nancy.Jaime	10	Leah	Leah	Leah	10	97	147.5	5	410	7.97	0.0192048	99	12675	NA	1.457	237.045	NA	NA	0.00154217	0.463157	8.39	0.0202169	NA	21.6	38.1	NA
45340_1	1	17weeks	Black.Hood	Nancy.Jaime	7	Leah	Leah	Leah	7	78	80	7	384	5.34	0.0136573	103	14107.5	NA	1.337	176.843	NA	NA	0.00150895	0.467515	8.57	0.0219182	NA	20.3	38.1	NA
45597_3	25	17weeks	Brown	Nancy	5	Leah	Leah	Leah	5	82.5	83	-8	346	5.93	0.0175444	96	10357.5	NA	0.738	199.222	NA	NA	0.0016568	0.540445	6.08	0.0179882	NA	20.3	36.8	NA
45600_1	24	17weeks	Brown	Nancy	8	Leah	Leah	Leah	8	71	45	-1	335	4.25	0.0127246	87	11925	NA	0.441	177.825	NA	NA	0.00185629	0.63133	3.42	0.0102395	NA	20.3	35.6	NA
45610_1	30	17weeks	Brown	Nancy	1	Leah	Leah	Leah	1	80.5	63.5	11	327	5.08	0.0150296	88	11077.5	NA	1.026	182.19	NA	NA	0.00189349	0.511344	6.18	0.018284	NA	20.3	38.1	NA
45610_2	30	17weeks	Black	Nancy	2	Leah	Leah	Leah	2	71	83.5	15	368	4.56	0.011906	86	11550	NA	0.964	208.035	NA	NA	0.00177546	0.52122	6.68	0.0174413	NA	20.3	38.1	NA
45921_3	27	17weeks	Black	Nancy	3	Leah	Leah	Leah	3	63.5	91.5	9	385	8.35	0.0211929	87	12870	NA	1.974	390.63	NA	NA	0.00152284	0.447454	6.65	0.0168782	NA	21.6	15.5	NA
45925_3	31	17weeks	Black	Nancy	9	Leah	Leah	Leah	9	71	55	9	308	3.64	0.0114826	93	10327.5	NA	1.111	199.718	NA	NA	0.00205047	0.496476	2.46	0.00776025	NA	20.3	38.1	NA
45925_4	31	17weeks	Black.Hood	Nancy	10	Leah	Leah	Leah	10	78	62.5	0	326	3.74	0.0114724	96	11557.5	NA	0.997	204.412	NA	NA	0.00159509	0.504804	2.66	0.00815951	NA	20.3	38.1	NA
46692_1	35	17weeks	Black.Hood	Nancy	3	Leah	Leah	Leah	3	105	136.5	9	293	3.3	0.0109272	92	9937.5	NA	1.23	157.86	NA	NA	0.0015894	0.486928	4.03	0.0133444	NA	19.1	36.8	NA
46693_1	36	17weeks	Brown.Hood	Nancy	5	Leah	Leah	Leah	5	76.5	49.5	31	395	6.4	0.0150235	88	12255	NA	1.193	140.415	NA	NA	0.00164319	0.494774	4.7	0.0110329	NA	21.6	38.1	NA
46694_1	37	17weeks	Brown.Hood	Nancy	7	Leah	Leah	Leah	7	79	75.5	12	324	4.14	0.0123214	89	10192.5	NA	1.425	188.917	NA	NA	0.00217262	0.475465	4.62	0.01375	NA	20.3	38.1	NA
46694_2	37	17weeks	Black.Hood	Nancy	8	Leah	Leah	Leah	8	90.5	115	13	328	4.15	0.0121701	85	10447.5	NA	1.795	344.738	NA	NA	0.00214076	0.457984	4.54	0.0133138	NA	20.3	38.1	NA
46695_2	38	17weeks	Brown.Hood	Nancy	12	Leah	Leah	Leah	12	88.5	71	8	275	2.05	0.00724382	91	10905	NA	0.597	114.052	NA	NA	0.00215548	0.576364	2.05	0.00724382	NA	20.3	35.6	NA
46698_1	39	17weeks	Black.Hood	Nancy.Jaime	5	Leah	Leah	Leah	5	75	67	6	305	2.31	0.00742765	80	10597.5	NA	0.832	152.903	NA	NA	0.00199357	0.548482	1.72	0.00553055	NA	19.1	35.6	NA
46698_2	39	17weeks	Black.Hood	Nancy.Jaime	6	Leah	Leah	Leah	6	87	54	5	340	3.77	0.0109275	79	9525	NA	1.168	235.192	NA	NA	0.00197101	0.508888	4.16	0.012058	NA	20.3	38.1	NA
46703_1	41	17weeks	Brown.Hood	Nancy.Jaime	3	Leah	Leah	Leah	3	85.5	95	11	369	6.15	0.0161842	90	10950	NA	2.023	448.185	NA	NA	0.00168421	0.442431	4.9	0.0128947	NA	21.6	38.1	NA
46703_2	41	17weeks	Black.Hood	Nancy.Jaime	4	Leah	Leah	Leah	4	70	149	2	424	8.73	0.020493	88	12307.5	NA	0.902	346.252	NA	NA	0.00171362	0.526402	9	0.0211268	NA	21.6	38.1	NA
46969_1	42	17weeks	Brown	Nancy	3	Leah	Leah	Leah	3	85.5	60.5	2	291	4.5	0.0153584	91	12945	NA	1.307	252.27	NA	NA	0.00191126	0.481854	3.45	0.0117747	NA	19.1	35.6	NA
46971_1	43	17weeks	Brown	Nancy.Jaime	7	Leah	Leah	Leah	7	86	67.5	8	295	4.84	0.0159736	92	11220	NA	0.918	243.78	NA	NA	0.00171617	0.519041	4.03	0.0133003	NA	19.1	35.6	NA
46971_2	43	17weeks	Black	Nancy.Jaime	8	Leah	Leah	Leah	8	70	75	7	338	6.6	0.0191304	88	12037.5	NA	0.439	112.755	NA	NA	0.00208696	0.630141	4.96	0.0143768	NA	20.3	38.1	NA
46971_4	43	17weeks	Brown	Nancy.Jaime	10	Leah	Leah	Leah	10	80	102	2	316	3.6	0.0113208	85	10035	NA	0.809	160.778	NA	NA	0.00213836	0.544257	3.56	0.011195	NA	20.3	36.8	NA
46972_1	44	17weeks	Brown	Nancy	3	Leah	Leah	Leah	3	114	74	-1	324	4.1	0.0126935	93	9952.5	NA	1.188	236.917	NA	NA	0.00164087	0.489405	4.02	0.0124458	NA	20.3	38.1	NA
47130_1	45	17weeks	Albino	Nancy	7	Leah	Leah	Leah	7	69.5	68	7	338	3.55	0.0102899	91	11970	NA	0.886	194.018	NA	NA	0.00173913	0.524528	3.75	0.0108696	NA	21.6	40.6	NA
47131_1	46	17weeks	Black	Nancy	8	Leah	Leah	Leah	8	81.5	43	15	339	3.32	0.00937853	89	9345	NA	0.654	167.82	NA	NA	0.00245763	0.566583	2.08	0.00587571	NA	21.6	40.6	NA
47133_1	47	17weeks	Albino	Nancy	10	Leah	Leah	Leah	10	68.5	82.5	6	356	4.1	0.011326	89	10170	NA	1.099	207.255	NA	NA	0.0021547	0.502415	5.55	0.0153315	NA	21.6	15.5	NA
47133_2	47	17weeks	Black	Nancy	11	Leah	Leah	Leah	11	74	152	11	410	7.19	0.0170784	96	11505	NA	1.083	164.002	NA	NA	0.00171021	0.49581	6.83	0.0162233	NA	22.9	40.6	NA
47516_1	48	17weeks	Brown	Nancy	5	Leah	Leah	Leah	5	88	139.5	5	345	4.15	0.0118571	89	10635	NA	0.64	121.02	NA	NA	0.0022	0.569616	2.86	0.00817143	NA	20.3	38.1	NA
47516_2	48	17weeks	Black.Hood	Nancy	6	Leah	Leah	Leah	6	82	150	11	353	5.48	0.0150549	88	10582.5	NA	0.552	140.347	NA	NA	0.0018956	0.592971	4.6	0.0126374	NA	20.3	38.1	NA
47517_1	49	17weeks	Black	Nancy	7	Leah	Leah	Leah	7	93	68.5	8	339	5.18	0.014928	88	11985	NA	0.956	165.075	NA	NA	0.00175793	0.519497	3.5	0.0100865	NA	20.3	38.1	NA
47517_2	49	17weeks	Black	Nancy	8	Leah	Leah	Leah	8	105.5	51.5	15	355	3.76	0.0101622	99	11685	NA	0.403	115.748	NA	NA	0.00191892	0.624633	2.03	0.00548649	NA	21.6	40.6	NA
47518_1	50	17weeks	Brown	Nancy	9	Leah	Leah	Leah	9	86.5	65.5	14	302	2.95	0.00933544	81	11152.5	NA	0.829	113.213	NA	NA	0.00205696	0.547334	2.28	0.00721519	NA	19.1	38.1	NA
47529_1	26	17weeks	Black.Hood	Nancy	1	Leah	Leah	Leah	1	77.5	84	5	407	6.18	0.015	77	10635	NA	0.742	228.405	NA	NA	0.00148058	0.569186	6.56	0.0159223	NA	21.6	40.6	NA
47529_2	26	17weeks	Brown.Hood	Nancy	2	Leah	Leah	Leah	2	88	119.5	-4	421	5.91	0.0141727	96	12217.5	NA	0.883	167.917	NA	NA	0.00182254	0.51861	5.61	0.0134532	NA	22.9	40.6	NA
47821_1	32	17weeks	Brown.Hood	Nancy	5	Leah	Leah	Leah	5	70	79.5	9	335	4.33	0.0125872	86	8302.5	NA	1.085	NA	NA	NA	0.00156977	0.507633	3.21	0.0093314	NA	20.3	38.1	NA
47821_2	32	17weeks	Brown.Hood	Nancy	6	Leah	Leah	Leah	6	75.5	131.5	-3	339	4.2	0.0125	104	11280	NA	1.048	197.738	NA	NA	0.00142857	0.490823	4.22	0.0125595	NA	21.6	38.1	NA
47825_1	34	17weeks	Brown	Nancy	1	Leah	Leah	Leah	1	68	75	1	362	6.5	0.0179063	90	12600	NA	1.061	275.483	NA	NA	0.00181818	0.505061	5.84	0.0160882	NA	20.3	38.1	NA
47825_2	34	17weeks	Brown.Hood	Nancy	2	Leah	Leah	Leah	2	62	103.5	6	305	4.25	0.0136656	93	12982.5	NA	1.17	197.167	NA	NA	0.0018328	0.490998	5.04	0.0162058	NA	19.1	35.6	NA
48491_1	43	17weeks	Brown	Nancy.Jaime	1	Leah	Leah	Leah	1	115	145.5	-3	368	7.27	0.0199178	96	11272.5	NA	1.578	204.982	NA	NA	0.00156164	0.458636	6.21	0.0170137	NA	20.3	38.1	NA
56269_3	59	17weeks	Brown	Katie	5	Leah	Leah	Leah	4	62.5	84.5	-38	385	6.25	0.0180115	86	9937.5	NA	1.274	331.433	NA	169389	0.00239193	0.490276	5.77	0.0166282	NA	21	37	NA
56269_4	59	17weeks	Black.Hood	Katie	6	Leah	Leah	Leah	6	72	82	16	328	5.74	0.016686	80	8737.5	NA	0.554	68.7	NA	110274	0.00290698	0.607312	4.55	0.0132267	NA	22	39	NA
56272_3	61	17weeks	Black.Hood	Katie	7	Leah	Leah	Leah	7	204.5	110.5	27	410	11.75	0.0268879	90	12787.5	NA	3.385	753.075	NA	149882	0.00201373	0.402609	10.33	0.0236384	NA	22	39	NA
56272_4	61	17weeks	Black.Hood	Katie	8	Leah	Leah	Leah	8	149	97	41	430	11.8	0.0250531	90	11325	NA	1.342	301.658	NA	223731	0.00165605	0.480309	12.62	0.0267941	NA	23	40.5	NA
56275_3	63	17weeks	Albino	Katie	9	Leah	Leah	Leah	9	66	52	6	308	4.06	0.0129299	78	9232.5	NA	0.86	123.9	NA	106816	0.00328025	0.547467	3.65	0.0116242	NA	21	38	NA
56275_4	63	17weeks	Albino	Katie	10	Leah	Leah	Katie	10	162.5	64.5	34	365	6.6	0.0165414	89	9705	NA	1.343	342.66	NA	169405	0.00243108	0.481356	6.91	0.0173183	NA	22	40.5	NA
56514_1	52	17weeks	Brown.Hood	Katie	1	Leah	Leah	Leah	1	156	84	5	320	5.45	0.0167692	69	10560	NA	1.057	317.19	NA	91259	0.00353846	0.536791	4.8	0.0147692	NA	20	37.5	NA
56514_2	52	17weeks	Black.Hood	Katie	2	Leah	Leah	Katie	2	155	87.5	4	375	8	0.0211082	73	11040	NA	1.184	337.238	NA	105774	0.00240106	0.516349	5.35	0.0141161	NA	21	38.5	NA
56522_2	53	17weeks	Black.Hood	Katie	4	Leah	Leah	Leah	5	97.5	91.5	69	329	5.98	0.0150251	83	10102.5	NA	1.336	294.127	NA	143493	0.00236181	0.489025	7.83	0.0196734	NA	23.5	40	NA
57215_3	72	17weeks	Brown	Katie	9	Leah	Leah	Leah	9	44	72.5	-1	320	5.23	0.016395	79	9307.5	NA	1.385	315.9	NA	131532	0.00263323	0.490418	5.13	0.0160815	NA	21	38.5	NA
57241_3	95	17weeks	Black.Hood	Katie	7	Leah	Leah	Leah	7	313	89	8	342	5.96	0.0170286	94	11265	0.00271429	1.857	449.707	NA	83872	0.00357143	0.446042	5.96	0.0170286	NA	22	39.5	NA
57241_4	95	17weeks	Albino	Katie	8	Leah	Leah	Leah	8	129	75.5	-2	325	4.31	0.0133437	95	12532.5	0.00275542	0.688	236.43	NA	132238	0.00312693	0.550869	3.08	0.0095356	NA	21	39.5	NA
57241_5	95	17weeks	Black.Hood	Katie	9	Leah	Leah	Leah	9	189	93	12	325	5.41	0.0160534	83	12885	0.0025816	1.423	573.9	NA	182218	0.00326409	0.48256	4.49	0.0133234	NA	20	38.5	NA
57241_6	95	17weeks	Albino	Katie	10	Leah	Leah	Leah	10	196	77.5	11	308	0.85	0.00266458	86	12352.5	0.00278997	0.996	313.995	NA	280376	0.00266458	0.517395	4.17	0.0130721	NA	19	38	NA
57460_3	104	17weeks	Black	Katie	5	Leah	Leah	Katie	5	75.5	72.5	-2	341	3.68	0.0108555	76	11902.5	0.00300885	1.406	254.843	NA	111810	0.00309735	0.492902	3.16	0.00932153	NA	21.5	40	NA
57460_4	104	17weeks	Black	Katie	6	Leah	Leah	Katie	6	77.5	78.5	3	317	4.23	0.0132187	82	11032.5	0.002875	0.707	122.955	NA	144968	0.0019375	0.56714	4.09	0.0127812	NA	20.5	37	NA
57604_3	100	17weeks	Black.Hood	Jz	5	Katie	Leah	Leah	5	114	81	6	232	3.24	0.0136134	91	11137.5	0.00306723	1.016	153.585	NA	138154	0.00327731	0.508664	2.6	0.0109244	NA	20	36	NA
57604_4	100	17weeks	Black.Hood	Jz	6	Katie	Leah	Leah	6	98	75.5	5	277	6.01	0.0213121	89	11775	0.00319149	2.024	NA	NA	202987	0.00265957	0.443341	4.74	0.0168085	NA	21	37	NA
57604_6	100	17weeks	Black.Hood	Jz	8	Katie	Leah	Leah	8	117.5	83.5	0	345	6.35	0.0184058	93	12187.5	0.00286957	1.732	147.315	NA	203550	0.00231884	0.453097	4.68	0.0135652	NA	22	39.5	NA
57636_3	111	17weeks	Albino	Jz	9	Katie	Leah	Leah	9	68.5	68.5	-2	355	4.28	0.0121246	85	10020	0.0029745	1.827	258.652	NA	162897	0.00328612	0.45638	3.69	0.0104533	NA	22.5	43	NA
57636_4	111	17weeks	Albino	Jz	10	Katie	Leah	Leah	10	48	47.5	4	303	3.45	0.0112378	80	10425	0.00315961	0.966	139.92	NA	152388	0.00335505	0.529642	3.02	0.00983713	NA	22.5	42	NA
57637_3	110	17weeks	Black	Katie	9	Leah	Leah	Katie	9	72	67.5	-1	308	7.4	0.0241042	75	9982.5	0.00267101	1.471	204.99	NA	122819	0.0034202	0.489554	6.1	0.0198697	NA	21	41	NA
57637_4	110	17weeks	Black	Jz	12	Katie	Leah	Katie	10	67.5	59.5	-3	319	4.95	0.0156646	77	9997.5	0.00291139	0.943	101.483	NA	133398	0.00262658	0.537345	5.16	0.0163291	NA	22	40.5	NA
57810_3	86	17weeks	Albino	Jz	1	Leah	Leah	Leah	1	77	61	3	337	5.58	0.0164118	92	10927.5	0.00264706	1.219	104.903	NA	79008	0.00379412	0.487854	5.72	0.0168235	NA	20	39.5	NA
57810_4	86	17weeks	Albino	Jz	2	Leah	Leah	Leah	2	127	75.5	8	311	5.97	0.0187147	86	10372.5	0.0030094	1.522	259.59	NA	141852	0.00338558	0.472386	4.5	0.0141066	NA	21.5	40.5	NA
57909_3	81	17weeks	Albino	Jz	1	Katie	Leah	Katie	1	100.5	101	3	307	4.37	0.0140968	89	12060	0.00290323	1.389	299.025	NA	92968	0.00306452	0.47799	2.65	0.00854839	NA	20.5	38	NA
57909_4	81	17weeks	Black.Hood	Jz	2	Katie	Leah	Katie	2	155	103	15	320	5.32	0.0158806	92	12652.5	0.00280597	1.784	328.642	NA	107276	0.00346269	0.45143	5.03	0.0150149	NA	20	37	NA
57913_3	84	17weeks	Brown.Hood	Katie	1	Leah	Leah	Katie	1	96	76.5	-4	369	3.89	0.0106575	78	10050	0.00271233	1.318	169.762	NA	102567	0.00328767	0.497015	4.03	0.0110411	NA	20.5	40.5	NA
57913_5	84	17weeks	Brown.Hood	Katie	3	Leah	Leah	Katie	3	76.5	63.5	5	345	5.2	0.0148571	67	9562.5	0.0026	0.627	144.3	NA	103359	0.00374286	0.616013	5.45	0.0155714	NA	21.5	40.5	NA
57913_6	84	17weeks	Black.Hood	Katie	4	Leah	Leah	Katie	4	103	66.5	2	363	6.33	0.0173425	69	9877.5	0.00268493	0.392	187.597	NA	224813	0.00175342	0.698258	6.28	0.0172055	NA	22	41	NA
57914_3	91	17weeks	Black.Hood	Jz	7	Leah	Leah	Leah	7	84.5	69.5	7	341	5.23	0.0150287	90	11437.5	0.00310345	1.859	308.033	NA	92513	0.00336207	0.449737	5.57	0.0160057	NA	22	38.5	NA
57914_4	91	17weeks	Black.Hood	Jz	8	Leah	Leah	Leah	8	47	71.5	9	376	5.01	0.013013	90	9592.5	0.00293506	0.99	207.232	NA	174806	0.00348052	0.512853	3.67	0.00953247	NA	22.5	41.5	NA
57914_5	91	17weeks	Black.Hood	Jz	9	Leah	Leah	Leah	9	62.5	80	15	283	2.96	0.00993289	93	11760	0.00305369	1.379	193.102	NA	78393	0.00375839	0.474373	3.41	0.011443	NA	21	37.5	NA
57914_6	91	17weeks	Black.Hood	Jz	10	Leah	Leah	Leah	10	76.5	69.5	12	353	4.5	0.0123288	85	11370	0.00273973	0.912	162.863	NA	124066	0.00331507	0.529265	3.9	0.0106849	NA	22	40	NA
58041_3	92	17weeks	Black.Hood	Katie	3	Leah	Leah	Leah	3	159.5	85	13	307	4.12	0.012875	92	11242.5	0.00309375	0.757	189.097	NA	106049	0.00384375	0.542628	3.02	0.0094375	NA	21	39	NA
58041_4	92	17weeks	Black.Hood	Katie	4	Leah	Leah	Leah	4	126.5	83.5	11	284	4	0.0135593	84	11340	0.00298305	0.663	272.902	NA	146811	0.00376271	0.572806	3.02	0.0102373	NA	21	38	NA
58041_5	92	17weeks	Black.Hood	Katie	5	Leah	Leah	Leah	5	174.5	84	10	278	4.51	0.0156597	83	12322.5	0.00284722	0.567	114.48	NA	134057	0.00364583	0.59785	3.55	0.0123264	NA	21	38.5	NA
58041_6	92	17weeks	Black.Hood	Katie	6	Leah	Leah	Leah	6	151	108	10	313	6.14	0.0190093	84	10462.5	0.00272446	1.245	306.585	NA	197320	0.00309598	0.495185	4.77	0.0147678	NA	22	39.5	NA
58095_3	94	17weeks	Black.Hood	Jz	5	Katie	Katie	Katie	5	231.5	92.5	-10	320	4.21	0.0135806	87	11925	0.00274194	1.98	714.645	NA	132162	0.0023871	0.44719	6.16	0.019871	NA	21	38	NA
58095_4	94	17weeks	Black	Jz	6	Katie	Katie	Katie	6	250	87	-10	347	3.96	0.0117507	94	10410	0.0027003	1.299	291.562	NA	110286	0.0027003	0.479217	4.77	0.0141543	NA	21	39	NA
58096_3	93	17weeks	Albino	Katie	1	Leah	Leah	Katie	1	104	88.5	14	375	7.07	0.0181748	91	12150	0.00269923	0.789	231.45	NA	53099	0.00336761	0.538759	6.95	0.0178663	NA	21	40	NA
58096_4	93	17weeks	Black.Hood	Katie	2	Leah	Leah	Katie	2	150.5	84	13	390	8.12	0.0201489	79	11317.5	0.00258065	1.532	256.38	NA	96982	0.00272953	0.480103	6.53	0.0162035	NA	22	41.5	NA
58096_5	93	17weeks	Black.Hood	Katie	3	Leah	Leah	Katie	3	341.5	101	20	393	8.11	0.0196368	83	10387.5	0.00292978	3.23	484.41	NA	71856	0.00336562	0.411814	9.77	0.0236562	NA	23	41.5	NA
58096_6	93	17weeks	Black.Hood	Katie	4	Leah	Leah	Katie	4	168.5	66.5	9	390	6.02	0.0150877	78	10447.5	0.00280702	3.348	693.3	NA	125171	0.00205514	0.413757	7.23	0.0181203	NA	22.5	42.5	NA
58096_7	93	17weeks	Black.Hood	Katie	5	Leah	Leah	Katie	5	191.5	85.5	14	388	7.72	0.019204	84	9427.5	0.00281095	1.561	276.24	NA	79135	0.00276119	0.472214	7.22	0.0179602	NA	22	41.5	NA
58096_8	93	17weeks	Black.Hood	Katie	6	Leah	Leah	Katie	6	137	90.5	3	402	6.84	0.0168889	82	11565	0.00271605	1.668	340.095	NA	77763	0.00375309	0.468163	6.89	0.0170123	NA	21	40	NA
58105_3	65	17weeks	Brown	Katie	7	Leah	Leah	Leah	7	53.5	78	-1	356	6.08	0.0171268	88	11385	NA	1.233	251.49	NA	105470	0.00385915	0.491293	3.44	0.00969014	NA	22.5	42.5	NA
58105_4	65	17weeks	Black	Katie	8	Leah	Leah	Leah	8	81	86	7	353	6.28	0.0174444	79	10657.5	NA	1.019	242.722	NA	124132	0.00238889	0.524714	3.82	0.0106111	NA	22.5	42	NA
58121_3	61	17weeks	Black.Hood	Katie	1	Leah	Leah	Leah	1	161.5	94.5	5	342	6.53	0.0188184	85	10740	NA	0.475	46.0725	NA	114882	0.0029683	0.622621	4.41	0.0127089	NA	19.5	37	NA
58121_4	61	17weeks	Black.Hood	Katie	2	Leah	Leah	Leah	2	128	113	15	375	9.34	0.0239487	83	9045	NA	0.936	232.762	NA	152490	0.00292308	0.529001	19.19	0.0492051	NA	20.5	38.5	NA
58122_4	63	17weeks	Albino	Katie	6	Leah	Leah	Leah	6	169	65.5	1	388	6.3	0.0161954	86	11625	NA	1.383	415.973	NA	169187	0.00287918	0.481853	5.81	0.0149357	NA	22.5	40.5	NA
58125_3	70	17weeks	Black	Katie	11	Leah	Leah	Leah	11	113	67	-2	406	9.73	0.0240842	95	12622.5	0.00257426	2.09	409.83	NA	183021	0.00232673	0.435186	10.08	0.0249505	NA	23	40.5	NA
58125_4	70	17weeks	Black.Hood	Katie	4	Leah	Leah	Leah	4	170.5	100.5	-3	375	9.98	0.026828	89	12600	NA	2.115	392.52	NA	206173	0.0025	0.439618	9.43	0.0253495	NA	22	40	NA
58293_3	62	17weeks	Black.Hood	Katie	3	Leah	Leah	Leah	3	172	93.5	10	405	6.9	0.0166265	82	12225	NA	2.878	495.945	NA	109879	0.00233735	0.421424	9.18	0.0221205	NA	23	42	NA
58293_4	62	17weeks	Black.Hood	Katie	4	Leah	Leah	Leah	4	157	86.5	0	345	5.79	0.0167826	89	12412.5	NA	3.418	547.492	NA	129163	0.0026087	0.402712	5.96	0.0172754	NA	23	40	NA
58294_3	66	17weeks	Black	Katie	1	Leah	Leah	Leah	1	127.5	95.5	7	349	6.63	0.0186236	92	11542.5	NA	1.316	185.37	NA	150149	0.00252809	0.480067	5.5	0.0154494	NA	22	40.5	NA
58294_4	66	17weeks	Albino	Katie	2	Leah	Leah	Leah	2	200	72.5	9	340	9.24	0.0264756	91	12360	NA	1.956	315.645	NA	167315	0.00272206	0.444363	6.23	0.017851	NA	18.5	37	NA
58295_4	67	17weeks	Brown.Hood	Katie	6	Leah	Leah	Leah	6	79	69.5	8	400	7.34	0.0179902	89	11985	NA	2.977	434.017	NA	84690	0.00289216	0.412683	5.52	0.0135294	NA	23	43.5	NA
58301_3	73	17weeks	Brown	Katie	9	Leah	Leah	Leah	9	160.5	81	6	338	5.95	0.0172965	86	9870	NA	1.339	146.925	NA	170038	0.0030814	0.485136	4.49	0.0130523	NA	22	41.5	NA
58301_4	73	17weeks	Brown.Hood	Katie	10	Leah	Leah	Leah	10	111.5	69	6	365	5.7	0.0153639	81	9735	NA	1.396	319.793	NA	78015	0.00369272	0.487004	4.88	0.0131536	NA	22.5	42.5	NA
58337_3	57	17weeks	Brown.Hood	Katie	3	Leah	Leah	Leah	3	86.5	51	0	311	3.31	0.0106431	81	9495	0.00311897	1.606	193.47	NA	121333	0.00270096	0.472985	5.67	0.0182315	NA	20	38	NA
58337_4	57	17weeks	Albino	Katie	4	Leah	Leah	Leah	4	81	56.5	3	279	3.22	0.0114184	93	11250	0.00347518	1.306	101.715	NA	131289	0.00319149	0.479748	3.73	0.013227	NA	20.5	39	NA
58342_3	69	17weeks	Black.Hood	Katie	7	Leah	Leah	Leah	7	81	67	10	340	4.36	0.0124571	83	11850	NA	1.605	353.58	NA	87308	0.00368571	0.470687	3.63	0.0103714	NA	23	42	NA
58343_4	71	17weeks	Brown.Hood	Katie	2	Leah	Leah	Leah	2	45	91.5	2	292	4.83	0.0164286	90	11152.5	0.00289116	1.203	139.088	NA	128800	0.00340136	0.491519	4.07	0.0138435	NA	21	38	NA
58564_3	56	17weeks	Black	Katie	5	Leah	Leah	Leah	5	116	60	0	350	6.69	0.0191143	76	11010	0.00285714	1.81	316.275	NA	99061	0.0028	0.467619	4.76	0.0136	NA	24	43	NA
58564_4	56	17weeks	Black.Hood	Katie	6	Leah	Leah	Leah	6	177	72.5	6	403	8.8	0.0215159	82	11715	0.00256724	1.365	286.515	NA	78971	0.00256724	0.488056	6.75	0.0165037	NA	23	42	NA
58566_3	58	17weeks	Black	Katie	7	Leah	Leah	Leah	7	97	57	6	363	6.07	0.0164499	81	9382.5	0.00298103	1.617	267.285	NA	119008	0.00327913	0.472323	5.08	0.0137669	NA	22	41	NA
58566_4	58	17weeks	Black.Hood	Katie	8	Leah	Leah	Leah	8	131.5	64.5	0	381	5.42	0.0142257	83	9435	0.00409449	1.48	156.817	NA	79695	0.00275591	0.47862	6.03	0.0158268	NA	22	40.5	NA
58570_3	74	17weeks	Brown.Hood	Katie	9	Leah	Leah	Leah	9	97	68.5	1	300	6.2	0.020598	89	9780	0.00332226	1.913	257.108	NA	86222	0.00299003	0.448208	4.54	0.0150831	NA	21	39.5	NA
58570_4	74	17weeks	Black.Hood	Katie	10	Leah	Leah	Leah	10	262	98	8	402	9.83	0.0239756	86	11205	0.00268293	1.802	333.757	NA	151020	0.00239024	0.456568	11.3	0.027561	NA	23	42	NA
58572_4	60	17weeks	Black.Hood	Katie	2	Leah	Leah	Leah	2	89	90	9	354	5.1	0.0140496	97	10852.5	0.00280992	1.198	213.93	NA	67222	0.00297521	0.484208	4.77	0.0131405	NA	23.5	42	NA
58765_3	55	17weeks	Brown.Hood	Katie	3	Leah	Leah	Leah	3	102.5	72.5	7	347	6.29	0.0177684	85	11160	0.00282486	1.947	266.625	NA	189939	0.00279661	0.450697	6.87	0.0194068	NA	22	39.5	NA
58765_4	55	17weeks	Brown	Katie	4	Leah	Leah	Leah	4	86.5	80.5	-1	383	6.01	0.015733	87	10807.5	0.00280105	1.2	299.243	NA	139362	0.00246073	0.495368	4.93	0.0129058	NA	24	41.5	NA
58769_3	61	17weeks	Black.Hood	Katie	5	Leah	Leah	Leah	5	91	89	15	350	7.83	0.0214521	83	10095	0.00287671	1.29	194.97	NA	128000	0.00347945	0.492691	5.64	0.0154521	NA	23	42	NA
58769_4	61	17weeks	Black.Hood	Katie	6	Leah	Leah	Leah	6	112	82	9	402	9.99	0.0243066	84	10342.5	0.0023601	1.923	320.483	NA	118333	0.00291971	0.452846	6.2	0.0150852	NA	25	43	NA
58771_3	64	17weeks	Black	Katie	7	Leah	Leah	Leah	7	107	75.5	-1	335	7.45	0.0223054	94	11077.5	0.00269461	3.002	417.262	NA	77699	0.00437126	0.408074	4.06	0.0121557	NA	21	40	NA
58771_4	64	17weeks	Black.Hood	Katie	8	Leah	Leah	Leah	8	75.5	74.5	5	354	6.91	0.0192479	90	11602.5	0.00264624	1.152	383.205	NA	151018	0.00317549	0.496107	3.6	0.0100279	NA	22	41	NA
58774_4	68	17weeks	Brown.Hood	Katie	2	Leah	Leah	Leah	2	79	81.5	6	353	8	0.0222841	88	12000	0.00431755	1.227	397.027	NA	237347	0.00272981	0.491805	10.33	0.0287744	NA	22	39	NA
58779_3	76	17weeks	Black	Katie	9	Leah	Leah	Leah	9	166.5	101.5	8	410	11.72	0.0280383	104	13087.5	0.00260766	4.554	401.91	NA	142716	0.00260766	0.373772	6.83	0.0163397	NA	24	41.5	NA
58779_4	76	17weeks	Black.Hood	Katie	10	Leah	Leah	Leah	10	138.5	93.5	0	378	7.46	0.0197354	87	12037.5	0.00272487	4.051	563.288	NA	104820	0.00322751	0.392606	6.06	0.0160317	NA	23.5	42	NA
59104_3	54	17weeks	Brown.Hood	Katie	1	Leah	Leah	Leah	1	176	97.5	8	345	5.97	0.0169122	82	11137.5	0.00288952	1.067	240.218	NA	159026	0.00325779	0.514939	6.38	0.0180737	NA	20	39	NA
59104_4	54	17weeks	Black.Hood	Katie	2	Leah	Leah	Leah	2	148.5	102	-8	371	7.4	0.0203857	82	12180	0.00289256	0.558	219.757	NA	121056	0.00344353	0.602247	8.26	0.0227548	NA	19	40	NA
59108_3	66	17weeks	Black	Katie	3	Leah	Leah	Katie	3	92.5	66.5	7	365	7.18	0.0193011	79	9367.5	0.0027957	0.417	120.675	NA	230488	0.0022043	0.658864	6.15	0.0165323	NA	21	40.5	NA
59108_4	66	17weeks	Albino	Katie	4	Leah	Leah	Katie	4	76.5	71	9	323	4.96	0.0149398	86	10852.5	0.00316265	0.825	165.428	NA	145591	0.0028012	0.540262	4.48	0.013494	NA	19.5	39.5	NA
59109_3	67	17weeks	Brown.Hood	Katie	5	Leah	Leah	Katie	5	163.5	71	2	375	6.01	0.0159416	86	11640	0.00310345	2.656	626.61	NA	198710	0.00246684	0.423958	6.19	0.0164191	NA	20	41	NA
59109_4	67	17weeks	Brown.Hood	Katie	6	Leah	Leah	Katie	6	107.5	61.5	2	355	5.49	0.0153782	82	10665	0.00352941	2.203	381.293	NA	272308	0.00291317	0.4431	5.08	0.0142297	NA	21	41.5	NA
59114_3	75	17weeks	Black.Hood	Katie	7	Leah	Leah	Leah	7	53.5	97.5	-2	356	4.43	0.0125141	80	9667.5	0.00274011	0.663	204.232	NA	157271	0.0030226	0.579843	3.22	0.00909605	NA	20.5	40.5	NA
59114_4	75	17weeks	Black	Katie	8	Leah	Leah	Leah	8	107	94.5	5	355	4.07	0.0113056	81	9652.5	0.00297222	0.497	208.028	NA	135651	0.0035	0.623115	3.97	0.0110278	NA	21.5	40.5	NA
59114_5	75	17weeks	Black.Hood	Katie	9	Leah	Leah	Leah	9	101.5	97	-4	295	3.97	0.0136426	83	11265	0.00319588	0.412	62.925	NA	95733	0.00360825	0.651901	3.29	0.0113058	NA	20	41	NA
59114_6	75	17weeks	Black	Katie	10	Leah	Leah	Leah	10	139	80.5	3	326	4.48	0.013617	82	8595	0.00294833	0.513	88.2525	NA	255048	0.00255319	0.61579	4.55	0.0138298	NA	NA	39	NA
59535_3	96	17weeks	Brown	Jz	1	Katie	Katie	Leah	1	66.5	115	4	348	4.93	0.0140057	83	9720	0.00292614	0.97	NA	NA	106667	0.00426136	0.5247	3.63	0.0103125	NA	21	39.5	NA
59535_4	96	17weeks	Brown	Jz	2	Katie	Katie	Leah	2	99	105.5	3	328	6.05	0.0182779	93	12060	0.00323263	1.618	339.113	NA	158919	0.00335347	0.45925	4.47	0.0135045	NA	19	36	NA
59535_5	96	17weeks	Brown	Jz	3	Katie	Katie	Leah	3	73	84	6	385	5.19	0.0132737	100	11782.5	0.00286445	2.374	270.817	NA	139214	0.00286445	0.420967	5	0.0127877	NA	22	42	NA
59535_6	96	17weeks	Brown	Jz	4	Katie	Katie	Leah	4	43.5	123.5	7	352	4.22	0.0117549	97	11362.5	0.00306407	1.21	287.835	NA	108533	0.00417827	0.483195	3.32	0.00924791	NA	20	39	NA
59962_3	87	17weeks	Albino	Jz	3	Katie	Katie	Leah	3	93	72	1	362	6.21	0.0171074	84	10740	0.00294766	1.001	324.877	NA	141158	0.0031405	0.519558	5.24	0.0144353	NA	21	40	NA
59962_5	87	17weeks	Brown.Hood	Jz	5	Katie	Katie	Leah	5	136	77.5	8	388	5.23	0.0132071	90	10267.5	0.0034596	2.285	399.967	NA	153649	0.00287879	0.432315	7.13	0.0180051	NA	22.5	41	NA
59962_6	87	17weeks	Brown.Hood	Jz	6	Katie	Katie	Leah	6	72.5	59.5	12	328	4.86	0.0142941	80	10425	0.00308824	1.634	356.572	NA	132566	0.00332353	0.472513	4.96	0.0145882	NA	21.5	39.5	NA
60209_3	92	17weeks	Black.Hood	Jz	1	Katie	Leah	Katie	1	157	80.5	8	302	5.3	0.0170968	86	11062.5	0.00303226	1.797	311.678	NA	118816	0.00403226	0.45682	4.43	0.0142903	NA	21	37	NA
60209_4	92	17weeks	Black.Hood	Jz	2	Katie	Leah	Katie	2	101	92.5	9	353	4.89	0.0135083	87	15780	0.00243094	1.172	657.435	NA	132406	0.00381215	0.497897	3.84	0.0106077	NA	22	39.5	NA
60209_5	92	17weeks	Black.Hood	Jz	3	Katie	Leah	Katie	3	95.5	95.5	8	303	4.48	0.0144051	87	9900	0.00308682	1.576	215.287	NA	99467	0.00482315	0.467929	3.59	0.0115434	NA	23	39.5	NA
60209_6	92	17weeks	Black.Hood	Jz	4	Katie	Leah	Katie	4	101.5	66	8	329	5.3	0.015727	89	9637.5	0.00278932	1.422	346.192	NA	134389	0.0021365	0.475672	3.88	0.0115134	NA	21.5	39.5	NA
60213_3	106	17weeks	Black	Jz	5	Katie	Leah	Katie	5	182	89	4	349	6.62	0.0187535	89	12225	0.00249292	2.138	129.72	NA	84934	0.00388102	0.438712	5.52	0.0156374	NA	23	41	NA
60213_4	106	17weeks	Albino	Jz	6	Katie	Leah	Katie	6	115.5	74	-3	383	7.86	0.0206842	84	11587.5	0.00271053	1.227	485.303	NA	114056	0.00281579	0.49674	8.17	0.0215	NA	22	39.5	NA
60214_3	115	17weeks	Black	Jz	7	Katie	Leah	Katie	7	97.5	76	7	384	4.53	0.0115857	87	11512.5	0.00248082	1.546	309.54	NA	90551	0.00352941	0.469764	4.46	0.0114066	NA	23.5	42	NA
60214_5	115	17weeks	Black	Katie	11	Katie	Leah	Katie	9	131	68.5	-5	360	4.83	0.0136056	79	10905	0.00247887	1.62	287.67	NA	79524	0.0035493	0.474576	3.73	0.010507	NA	22	40.5	NA
60214_6	115	17weeks	Black.Hood	Katie	12	Katie	Leah	Katie	10	132.5	79.5	-3	306	3.27	0.0107921	88	10530	0.00224422	0.823	206.985	NA	78627	0.00336634	0.537668	2.97	0.00980198	NA	22	39	NA
60444_3	104	17weeks	Black	Jz	3	Katie	Leah	Katie	3	126	94.5	10	319	6.01	0.0182675	77	9307.5	0.00316109	1.872	279.225	NA	93978	0.00270517	0.463221	3.46	0.0105167	NA	21.5	37.5	NA
60444_4	104	17weeks	Black.Hood	Jz	4	Katie	Leah	Katie	4	132.5	81.5	10	326	6.53	0.0194345	84	9930	0.0025	1.927	318.277	NA	119231	0.00309524	0.452661	3.87	0.0115179	NA	22	39	NA
60444_5	104	17weeks	Black	Jz	5	Katie	Leah	Katie	5	99	64.5	10	325	7.44	0.022209	88	11445	0.00289552	1.554	339.27	NA	115870	0.00274627	0.468179	4.76	0.014209	NA	22	38	NA
60444_6	104	17weeks	Brown	Jz	6	Katie	Leah	Katie	6	109.5	76.5	17	305	5.58	0.0173292	84	11677.5	0.0028882	1.81	340.275	NA	170526	0.00295031	0.458304	3.87	0.0120186	NA	20.5	38	NA
60444_7	104	17weeks	Brown	Jz	7	Katie	Leah	Katie	7	101.5	97	19	314	4.18	0.0125526	79	10530	0.00324324	1.437	333.9	NA	162061	0.00297297	0.486598	4.73	0.0142042	NA	22	39	NA
60444_8	104	17weeks	Black.Hood	Jz	8	Katie	Leah	Katie	8	73	71.5	11	326	5.35	0.0158754	77	12435	0.00302671	1.092	219.352	NA	128513	0.00347181	0.519558	3.78	0.0112166	NA	22	39	NA
60445_3	112	17weeks	Black	Katie	7	Leah	Leah	Katie	7	60	59.5	12	281	2.34	0.00798635	88	9480	0.00358362	1.426	190.26	NA	60904	0.00392491	0.476508	3.47	0.011843	NA	21	38	NA
60445_4	112	17weeks	Black.Hood	Katie	8	Leah	Leah	Katie	8	77	70	6	285	3.11	0.0106873	84	9502.5	0.00316151	1.364	215.482	NA	57269	0.00357388	0.485651	3.55	0.0121993	NA	20	37.5	NA
60445_5	112	17weeks	Black	Katie	9	Leah	Leah	Katie	9	49.5	68	12	263	1.99	0.00723636	82	9772.5	0.00363636	0.871	166.71	NA	75911	0.00327273	0.539423	2.69	0.00978182	NA	20	38	NA
60641_3	83	17weeks	Brown.Hood	Jz	1	Katie	Katie	Katie	1	287.5	79.5	3	317	6.14	0.0191875	92	12375	0.00259375	1.928	797.783	NA	99241	0.003625	0.444663	6.21	0.0194062	NA	21	39	NA
60641_4	83	17weeks	Brown	Jz	2	Katie	Katie	Katie	2	119	84	0	273	4.82	0.0176557	81	11467.5	0.00289377	1.142	412.147	NA	138684	0.00278388	0.508608	3.36	0.0123077	NA	20.5	38.5	NA
60644_3	88	17weeks	Brown.Hood	Jz	3	Katie	Katie	Katie	3	94.5	70.5	7	345	4.14	0.0117614	81	11767.5	0.00326705	3.003	425.67	NA	84301	0.00377841	0.419104	4.83	0.0137216	NA	22	40	NA
60644_4	88	17weeks	Brown.Hood	Jz	4	Katie	Katie	Katie	4	132	86	3	402	5.67	0.014	85	13755	0.00414815	1.585	329.025	NA	75923	0.0025679	0.469605	6.43	0.0158765	NA	22	39	NA
60645_3	96	17weeks	Black	Jz	7	Katie	Katie	Katie	7	102.5	107.5	10	325	5.25	0.0156716	91	11220	0.00286567	3.183	486.195	NA	89020	0.00292537	0.406194	4.32	0.0128955	NA	22	38.5	NA
60645_4	96	17weeks	Black	Jz	8	Katie	Katie	Katie	8	73.5	102	6	334	4	0.0117647	78	9960	0.00273529	1.362	243.757	NA	51120	0.00441176	0.493517	3.12	0.00917647	NA	21	40	NA
60645_5	96	17weeks	Black	Jz	9	Katie	Katie	Katie	9	145.5	118.5	5	357	5.42	0.0149724	93	10245	0.00298343	3.59	386.288	NA	122871	0.00342541	0.396263	6.34	0.0175138	NA	22	39.5	NA
60645_6	96	17weeks	Brown	Jz	10	Katie	Katie	Katie	10	95.5	122	15	376	5.54	0.0141688	86	10012.5	0.00314578	2.805	396.93	NA	88148	0.00276215	0.419739	4.71	0.012046	NA	22	40.5	NA
60650_3	77	17weeks	Albino	Jz	9	Katie	Leah	Katie	9	117.5	113.5	5	290	3.71	0.0125763	88	9525	0.00322034	0.97	192.945	NA	94489	0.00305085	0.517798	3.67	0.0124407	NA	19	37	NA
60650_4	77	17weeks	Albino	Jz	10	Katie	Leah	Katie	10	135.5	96.5	11	275	3.45	0.0120629	88	10455	0.00398601	1.153	193.83	NA	135747	0.00276224	0.498427	3.38	0.0118182	NA	20.5	37	NA
61038_3	87	17weeks	Brown	Jz	1	Katie	Katie	Katie	1	129.5	91.5	11	434	8.77	0.0197079	88	14497.5	0.00314607	2.05	281.738	NA	74060	0.00523596	0.443216	7.88	0.0177079	NA	23	42.5	NA
61038_4	87	17weeks	Brown.Hood	Jz	2	Katie	Katie	Katie	2	54	73	12	333	3.84	0.0111304	86	10522.5	0.00295652	1.335	204.532	NA	133223	0.00350725	0.485442	4.2	0.0121739	NA	23	41.5	NA
61038_5	87	17weeks	Albino	Jz	3	Katie	Katie	Katie	3	80.5	58	19	391	5.35	0.0130488	82	9967.5	0.003	2.823	370.62	NA	126667	0.00234146	0.422918	6.04	0.0147317	NA	23	41.5	NA
61038_6	87	17weeks	Brown.Hood	Jz	4	Katie	Katie	Katie	4	163.5	69.5	22	443	8.9	0.0191398	77	11700	0.00268817	3.109	919.133	NA	190528	0.00227957	0.420325	9.44	0.0203011	NA	23.5	41	NA
61040_3	95	17weeks	Black	Jz	5	Katie	Katie	Katie	5	66	70	7	292	3.76	0.0125753	91	11685	0.00287625	1.282	226.942	NA	87579	0.00381271	0.483809	3.61	0.0120736	NA	19	36	NA
61040_4	95	17weeks	Albino	Jz	6	Katie	Katie	Katie	6	134	80.5	8	345	4.8	0.0135977	84	10590	0.0027762	1.777	342.562	NA	155596	0.00308782	0.459989	5.22	0.0147875	NA	21.5	38	NA
61040_5	95	17weeks	Black	Jz	7	Katie	Katie	Katie	7	116.5	66	11	330	2.68	0.00785924	90	9720	0.00269795	0.954	153.173	NA	75474	0.00334311	0.517119	3.48	0.0102053	NA	22	40	NA
61040_6	95	17weeks	Albino	Jz	8	Katie	Katie	Katie	8	129.5	57	15	359	6.75	0.0180481	91	13717.5	0.00262032	3.061	591.12	NA	151882	0.00272727	0.409014	7.23	0.0193316	NA	22	40	NA
61041_3	99	17weeks	Albino	Jz	9	Katie	Katie	Katie	9	66	69.5	13	300	4.46	0.0142492	84	9315	0.00325879	2.097	231.3	NA	44423	0.00332268	0.44526	2.43	0.00776358	NA	22	40	NA
61041_4	99	17weeks	Black.Hood	Jz	10	Katie	Katie	Katie	10	29	64	6	291	3.38	0.0113805	69	11580	0.00319865	0.642	107.243	NA	96364	0.00222222	0.607392	2.69	0.00905724	NA	21.5	39	NA
61158_3	79	17weeks	Albino	Jz	1	Katie	Katie	Katie	1	43	64	1	321	3.92	0.0121739	87	10335	0.00279503	0.412	123.323	NA	77425	0.00453416	0.643328	2.43	0.00754658	NA	19.5	38	NA
61158_4	79	17weeks	Black.Hood	Jz	2	Katie	Katie	Katie	2	74.5	70.5	3	303	3.27	0.0106863	95	12405	0.00313725	1.126	178.38	NA	102484	0.00405229	0.49279	3.14	0.0102614	NA	22	40	NA
61160_3	89	17weeks	Black	Jz	3	Katie	Katie	Katie	3	44.5	93.5	0	314	3.48	0.0110828	87	11070	0.00378981	1.343	245.708	NA	117966	0.00375796	0.483654	3.56	0.0113376	NA	19.5	36	NA
61160_4	89	17weeks	Brown.Hood	Jz	4	Katie	Katie	Katie	4	82	99.5	1	383	5.51	0.014349	88	11880	0.00346354	2.137	409.147	NA	182275	0.00265625	0.439698	5.86	0.0152604	NA	21	38	NA
61162_3	91	17weeks	Black.Hood	Jz	5	Katie	Katie	Katie	5	53.5	75.5	7	344	4.03	0.0114815	90	10410	0.00296296	0.836	144.697	NA	94817	0.00327635	0.532922	3.45	0.00982906	NA	22	40	NA
61162_4	91	17weeks	Black.Hood	Jz	6	Katie	Katie	Katie	6	73	91	6	338	4.65	0.0135174	89	10282.5	0.00322674	1.81	293.055	NA	117186	0.00343023	0.45309	4.19	0.0121802	NA	22	39	NA
61163_3	98	17weeks	Black	Jz	7	Katie	Katie	Katie	7	74.5	62	0	338	4.13	0.0122189	85	10312.5	0.00319527	1.842	249.645	NA	108326	0.00399408	0.455641	3.54	0.0104734	NA	20.5	41	NA
61163_4	98	17weeks	Brown	Jz	8	Katie	Katie	Katie	8	80	75.5	4	412	8.68	0.0208654	89	13267.5	0.00286058	2.134	338.933	NA	188126	0.00305288	0.438869	8.34	0.0200481	NA	23	41	NA
61172_3	112	17weeks	Black	Jz	9	Katie	Katie	Katie	9	38.5	49.5	8	286	2.22	0.00755102	74	8805	0.00323129	0.959	140.91	NA	167213	0.00207483	0.540234	3.33	0.0113265	NA	20	38.5	NA
61172_4	112	17weeks	Black.Hood	Jz	10	Katie	Katie	Katie	10	61	60.5	2	304	4.84	0.015817	81	10380	0.00349673	1.509	310.785	NA	129698	0.00346405	0.479117	4.33	0.0141503	NA	21	40	NA
61357_4	82	17weeks	Black.Hood	Jz	2	Katie	Katie	Katie	2	63.5	83.5	2	296	3.09	0.0103691	75	9795	0.00315436	1.192	231.18	NA	139878	0.00328859	0.512469	2.79	0.00936242	NA	20	39	NA
61638_3	78	17weeks	Brown.Hood	Jz	1	Katie	Katie	Katie	1	146.5	109.5	6	295	5.55	0.0184385	91	11040	0.00265781	0.241	NA	NA	131958	0.00318937	0.74568	5.9	0.0196013	NA	21.5	38.5	NA
61638_4	78	17weeks	Brown.Hood	Jz	2	Katie	Katie	Katie	2	131.5	87.5	-7	314	3.97	0.0129316	84	12150	0.0029316	0.689	372.075	NA	102392	0.00315961	0.567376	3.22	0.0104886	NA	21	39	NA
61638_5	78	17weeks	Brown.Hood	Jz	3	Katie	Katie	Katie	3	136	98	5	320	6.1	0.0187692	102	11947.5	0.00276923	1.8	261.015	NA	183171	0.00252308	0.441721	4.32	0.0132923	NA	19.5	38	NA
61638_6	78	17weeks	Brown.Hood	Jz	4	Katie	Katie	Katie	4	106	97.5	10	323	5.86	0.0175976	89	11910	0.0027027	1.131	196.86	NA	142725	0.00273273	0.499288	4.18	0.0125526	NA	20.5	39	NA
61641_3	88	17weeks	Brown	Jz	5	Katie	Katie	Katie	5	106.5	91	-4	314	4.16	0.0134194	90	11602.5	0.00383871	0.936	244.838	NA	129010	0.00332258	0.519341	4.12	0.0132903	NA	21	37.5	NA
61641_4	88	17weeks	Black	Jz	6	Katie	Katie	Katie	6	50	63	-7	324	3.52	0.0111041	74	10582.5	0.00429022	0.335	159.382	NA	186555	0.00375394	0.717218	3.41	0.0107571	NA	21	39.5	NA
61643_3	94	17weeks	Brown	Jz	5	Katie	Katie	Katie	5	366	102.5	8	329	7.69	0.022819	89	10717.5	0.00278932	3.672	475.38	NA	154947	0.00225519	0.397726	7.73	0.0229377	NA	19	37	NA
61643_4	94	17weeks	Black	Jz	6	Katie	Katie	Katie	6	241	97	6	316	5.07	0.0157453	86	10590	0.0031677	1.305	345.075	NA	97018	0.00354037	0.487779	5.12	0.0159006	NA	20.5	38.5	NA
61643_5	94	17weeks	Brown	Jz	7	Katie	Katie	Katie	7	216.5	84.5	1	325	6.4	0.0196319	84	9660	0.00269939	1.45	251.347	NA	83393	0.00343558	0.479467	4.57	0.0140184	NA	22	39	NA
61643_6	94	17weeks	Black.Hood	Jz	8	Katie	Katie	Katie	8	256	97.5	9	393	8.34	0.0207463	85	10605	0.00281095	2.145	418.635	NA	149308	0.00266169	0.442312	8.8	0.0218905	NA	20	38	NA
61644_3	96	17weeks	Black	Katie	11	Leah	Leah	Katie	11	109.5	126	7	338	5.1	0.0147826	95	9157.5	0.00318841	1.244	195.262	NA	68972	0.00310145	0.482499	4.46	0.0129275	NA	19	38.5	NA
61644_4	96	17weeks	Brown	Katie	12	Leah	Leah	Katie	12	88.5	124	-3	362	4.15	0.0115599	92	9495	0.00275766	1.097	158.895	NA	81143	0.00311978	0.499003	4.14	0.011532	NA	19	38.5	NA
61645_3	100	17weeks	Black.Hood	Jz	7	Katie	Katie	Katie	7	105	80.5	-2	308	5.41	0.0176797	85	13200	0.0030719	1.399	311.197	NA	124400	0.00326797	0.481873	5.07	0.0165686	NA	21	38	NA
61645_4	100	17weeks	Black.Hood	Jz	8	Katie	Katie	Katie	8	65	65.5	3	265	2.89	0.0107836	82	9997.5	0.00320896	0.801	149.393	NA	210575	0.00272388	0.550223	2.04	0.00761194	NA	17.5	35	NA
61646_3	111	17weeks	Albino	Jz	9	Katie	Katie	Katie	9	89	68.5	3	353	4.81	0.0135112	78	10072.5	0.00353933	1.04	306.51	NA	147127	0.00308989	0.523799	4.63	0.0130056	NA	20	41.5	NA
61646_4	111	17weeks	Albino	Jz	10	Katie	Katie	Katie	10	84	56.5	-3	348	3.92	0.0113623	73	11595	0.00333333	0.84	216.157	NA	179284	0.00275362	0.559409	3.16	0.00915942	NA	21.5	41	NA
61821_3	90	17weeks	Black.Hood	Katie	3	Leah	Leah	Katie	3	118	84.5	4	316	4.75	0.0148437	90	13260	0.002875	1.453	360.142	NA	103726	0.00228125	0.472476	7.8	0.024375	NA	21	39	NA
61821_4	90	17weeks	Brown.Hood	Katie	4	Leah	Leah	Katie	4	145	103.5	-4	326	3.12	0.00968944	90	10215	0.00307453	0.698	167.153	NA	59573	0.00319876	0.556143	3.38	0.0104969	NA	20	38	NA
61821_6	90	17weeks	Brown.Hood	Katie	6	Leah	Leah	Katie	6	79.5	78	4	303	2.6	0.00846906	80	9465	0.00400651	0.465	127.103	NA	119457	0.00263844	0.636722	2.73	0.00889251	NA	17	37	NA
62035_3	84	17weeks	Brown.Hood	Katie	1	Leah	Leah	Katie	1	120	60	11	395	7.99	0.0196798	77	10455	0.00285714	1.011	300.93	NA	72317	0.00310345	0.528753	7.18	0.0176847	NA	22	43	NA
62035_4	84	17weeks	Black.Hood	Katie	2	Leah	Leah	Katie	2	82	73.5	5	374	6.01	0.0158575	82	9690	0.00261214	0.721	315.712	NA	82781	0.00337731	0.564414	6.4	0.0168865	NA	23	43.5	NA
62043_3	109	17weeks	Brown.Hood	Katie	7	Leah	Leah	Katie	7	89	107.5	8	343	5.66	0.0161254	94	11362.5	0.00287749	1.562	92.865	NA	96962	0.00296296	0.461508	6.5	0.0185185	NA	19.5	39	NA
62043_4	109	17weeks	Black	Katie	8	Leah	Leah	Katie	8	62.5	100	9	335	4.17	0.0121221	85	11295	0.00302326	2.098	314.062	NA	100067	0.00348837	0.444203	4.68	0.0136047	NA	20	39	NA
62044_3	112	17weeks	Black	Katie	7	Leah	Leah	Katie	7	89	60.5	-5	314	4.21	0.0136246	84	9952.5	0.00333333	1.433	173.505	NA	99922	0.00330097	0.480648	3.98	0.0128803	NA	20	40	NA
62044_4	112	17weeks	Black.Hood	Katie	8	Leah	Leah	Katie	8	95.5	62.5	-1	373	3.85	0.0103495	77	10080	0.00365591	0.983	205.192	NA	68923	0.00349462	0.532185	4.16	0.0111828	NA	19	38	NA
62044_5	112	17weeks	Black	Katie	9	Leah	Leah	Katie	9	78.5	52	-4	363	3.93	0.0109471	80	10230	0.00311978	0.781	251.857	NA	59556	0.00350975	0.556873	4	0.0111421	NA	21	41	NA
62046_3	77	17weeks	Albino	Katie	9	Leah	Leah	Katie	9	95	86.5	24	307	3.47	0.0104834	86	9772.5	0.00302115	1.756	207.322	NA	92679	0.00338369	0.458921	3.89	0.0117523	NA	19	36.5	NA
62046_4	77	17weeks	Brown.Hood	Katie	10	Leah	Leah	Katie	10	105.5	94.5	14	303	3.97	0.0125237	84	11160	0.00302839	0.51	170.722	NA	120125	0.00302839	0.612802	3.84	0.0121136	NA	18	36.5	NA
62288_3	80	17weeks	Black	Katie	1	Leah	Leah	Katie	1	96	54	4	341	3.38	0.0097971	87	11782.5	0.00321739	0.716	149.317	NA	84770	0.00391304	0.557279	3.49	0.0101159	NA	20	40	NA
62288_4	80	17weeks	Black.Hood	Katie	2	Leah	Leah	Katie	2	72.5	80.5	4	356	3.76	0.0104444	83	11947.5	0.00308333	0.212	NA	NA	106681	0.00252778	0.802946	4.65	0.0129167	NA	21	40	NA
62288_5	80	17weeks	Black	Katie	3	Leah	Leah	Katie	3	66.5	90.5	15	362	4.75	0.0125995	87	13050	0.0030504	0.268	114.54	NA	91101	0.00342175	0.731179	4.13	0.0109549	NA	18	38	NA
62288_6	80	17weeks	Black.Hood	Katie	4	Leah	Leah	Katie	4	44.5	47.5	14	322	2.63	0.00782738	79	11017.5	0.00315476	0.316	63.8775	NA	131808	0.00372024	0.715659	1.99	0.00592262	NA	19	38	NA
62289_3	81	17weeks	Black.Hood	Katie	1	Leah	Leah	Katie	1	87	91	19	328	4.11	0.0118444	81	10455	0.00268012	1.189	172.86	NA	83379	0.0029683	0.504117	2	0.00576369	NA	18	38.5	NA
62289_4	81	17weeks	Albino	Katie	2	Leah	Leah	Katie	2	58	101.5	8	313	3.93	0.012243	86	11205	0.00333333	0.861	175.102	NA	148606	0.00308411	0.534902	2.85	0.0088785	NA	19	37	NA
62293_3	89	17weeks	Brown.Hood	Katie	3	Leah	Leah	Katie	3	50.5	101	9	332	3.52	0.0103226	85	11272.5	0.00357771	1.677	273.795	NA	74459	0.00357771	0.464263	3.92	0.0114956	NA	19	38	NA
62293_4	89	17weeks	Brown	Katie	4	Leah	Leah	Katie	4	115.5	79.5	20	344	4.51	0.0123901	84	11557.5	0.0031044	1.877	268.522	NA	112863	0.0028022	0.455012	5.83	0.0160165	NA	20	37	NA
62295_3	98	17weeks	Brown	Katie	5	Leah	Leah	Katie	5	94	67	16	329	6.14	0.0177971	87	10102.5	0.00307246	3.41	355.47	NA	75016	0.00365217	0.404486	4.99	0.0144638	NA	20	39.5	NA
62295_4	98	17weeks	Black	Katie	6	Leah	Leah	Katie	6	69	74	14	360	4.77	0.012754	87	10507.5	0.00304813	2.131	312.135	NA	160906	0.00283422	0.440897	4.84	0.0129412	NA	20	39	NA
62296_3	114	17weeks	Brown.Hood	Katie	5	Leah	Leah	Katie	5	133.5	99	13	303	2.72	0.00860759	85	11910	0.00316456	0.511	92.3475	NA	84471	0.00322785	0.61056	2.37	0.0075	NA	19	38.5	NA
62296_4	114	17weeks	Black	Katie	6	Leah	Leah	Katie	6	180	96	3	311	4.91	0.0156369	82	10755	0.00308917	0.525	112.71	NA	81043	0.00292994	0.612005	4.72	0.0150318	NA	18	37.5	NA
62298_3	85	17weeks	Albino	Katie	7	Leah	Leah	Katie	7	143.5	34	6	285	3.47	0.0119244	80	8302.5	0.00274914	0.525	105.69	NA	100842	0.00261168	0.616048	4.21	0.0144674	NA	17	36.2	NA
62298_4	85	17weeks	Brown.Hood	Katie	8	Leah	Leah	Katie	8	251.5	28.5	7	314	5.53	0.0172274	82	8932.5	0.00255452	0.845	198.93	NA	124817	0.0028972	0.54328	5.7	0.017757	NA	18.5	37	NA
62302_3	108	17weeks	Brown	Katie	9	Leah	Leah	Katie	9	48	108.5	11	397	6.1	0.014951	91	10387.5	0.00296569	1.655	269.52	NA	74694	0.00360294	0.459171	7.62	0.0186765	NA	21	38	NA
62302_4	108	17weeks	Brown.Hood	Katie	10	Leah	Leah	Katie	10	42.5	89	11	351	4.48	0.0123757	88	10777.5	0.00267956	0.479	93.8625	NA	69782	0.00328729	0.615453	4.72	0.0130387	NA	19	38	NA
62305_4	116	17weeks	Brown.Hood	Jaime	2	Katie	Katie	Katie	2	150	93.5	9	322	5.09	0.0153776	91	10507.5	0.00280967	1.598	218.873	NA	249097	0.00187311	0.462402	6.16	0.0186103	NA	19	35	NA
62305_5	116	17weeks	Black.Hood	Jaime	3	Katie	Katie	Katie	3	128.5	99	11	369	5.05	0.0132895	105	13080	0.00252632	1.316	274.942	NA	172506	0.00207895	0.467193	6.47	0.0170263	NA	22.5	40.5	NA
62309_3	86	17weeks	Albino	Jaime	5	Katie	Katie	Katie	5	112	83.5	6	285	4.4	0.0151203	89	10732.5	0.00285223	1.541	254.82	NA	116198	0.00347079	0.467904	4.54	0.0156014	NA	18	37	NA
62309_4	86	17weeks	Brown	Jaime	6	Katie	Katie	Katie	6	163.5	111	3	299	4.38	0.0145033	92	10417.5	0.00271523	1.328	218.107	NA	126682	0.00291391	0.47916	4.53	0.015	NA	18	38	NA
62310_4	90	17weeks	Black.Hood	Jaime	8	Katie	Katie	Katie	8	75.5	93	18	274	2.67	0.00914384	75	9832.5	0.00393836	1.102	238.665	NA	128396	0.00311644	0.521582	3.72	0.0127397	NA	18	35	NA
62312_3	97	17weeks	Brown	Jaime	9	Katie	Katie	Katie	9	78	120	-3	380	1.07	0.0028382	84	10065	0.00286472	2	305.348	NA	141115	0.00323607	0.449376	5.85	0.0155172	NA	20	41.5	NA
62312_4	97	17weeks	Brown.Hood	Jaime	10	Katie	Katie	Katie	10	157	112	-3	381	7.26	0.0192063	82	11385	0.00256614	2.491	416.842	NA	163925	0.00283069	0.432865	6.34	0.0167725	NA	20	41	NA
62314_3	81	17weeks	Albino	Katie	1	Leah	Leah	Katie	1	166.5	97	-5	316	5.18	0.0166559	94	10470	0.0029582	1.493	170.377	NA	98630	0.00347267	0.465725	2.81	0.00903537	NA	18	37.5	NA
62314_4	81	17weeks	Black.Hood	Katie	2	Leah	Leah	Katie	2	69	99.5	9	318	4.79	0.0146483	83	11730	0.00293578	0.928	144.87	NA	95285	0.00376147	0.530047	2.64	0.00807339	NA	18	37	NA
62315_3	83	17weeks	Black.Hood	Jaime	5	Katie	Katie	Katie	5	124.5	73.5	7	328	6.34	0.0189254	80	9832.5	0.00271642	1.764	389.663	NA	95134	0.00289552	0.465205	6	0.0179104	NA	20	38	NA
62315_4	83	17weeks	Brown.Hood	Jaime	6	Katie	Katie	Katie	6	132	87.5	26	306	5.71	0.0171988	84	13230	0.0026506	1.037	288.99	NA	99656	0.0028012	0.515448	4.97	0.0149699	NA	18	37.5	NA
62316_3	88	17weeks	Black	Jaime	7	Katie	Katie	Katie	7	110.5	73.5	7	343	3.77	0.0107714	77	10140	0.00311429	0.957	NA	NA	127686	0.00291429	0.535503	3.5	0.01	NA	18.5	37	NA
62316_4	88	17weeks	Black	Jaime	8	Katie	Katie	Katie	8	128.5	83	5	345	5.99	0.0171143	93	10890	0.00451429	1.406	201.037	NA	129856	0.00277143	0.472485	5.96	0.0170286	NA	19	37	NA
62317_3	89	17weeks	Black	Jaime	3	Katie	Katie	Katie	3	80	115.5	3	392	6.15	0.0155696	81	13710	0.00349367	1.201	281.183	NA	98169	0.00359494	0.503011	7.88	0.0199494	NA	19.5	38	NA
62317_4	89	17weeks	Brown.Hood	Jaime	4	Katie	Katie	Katie	4	71	87.5	3	335	3.94	0.0116568	76	9562.5	0.00467456	1.293	264.21	NA	127107	0.00357988	0.501904	5.33	0.0157692	NA	19	36	NA
62318_3	91	17weeks	Black.Hood	Katie	3	Leah	Leah	Katie	3	106	81	8	266	3.42	0.0124818	87	9412.5	0.00288321	1.544	217.44	NA	127527	0.00339416	0.469888	5.04	0.0183942	NA	18	34.5	NA
62318_4	91	17weeks	Black.Hood	Katie	4	Leah	Leah	Katie	4	78.5	95	17	396	6.92	0.0167554	97	10852.5	0.00271186	1.264	188.595	NA	117538	0.00251816	0.478808	5.93	0.0143584	NA	20	38.5	NA
62320_3	105	17weeks	Brown.Hood	Katie	11	Leah	Leah	Katie	9	114.5	97.5	10	403	8.84	0.0214044	85	10987.5	0.00283293	0.704	NA	NA	160860	0.00225182	0.562749	10.81	0.0261743	NA	22	40	NA
62320_4	105	17weeks	Black	Jaime	10	Katie	Katie	Katie	10	80.5	84.5	13	369	5.83	0.0152618	82	10102.5	0.00274869	1.142	119.775	NA	11791	0.00301047	0.507233	5.35	0.0140052	NA	20	40	NA
62321_3	106	17weeks	Black	Jaime	1	Katie	Katie	Katie	1	175	96	-2	373	6.84	0.0184367	85	10672.5	0.00261456	1.332	230.752	NA	108734	0.00293801	0.486873	7.02	0.0189218	NA	20	37.5	NA
62321_4	106	17weeks	Black.Hood	Jaime	2	Katie	Katie	Katie	2	122.5	78.5	2	385	9.46	0.0244444	70	11400	0.00299742	0.856	348.645	NA	91360	0.00322997	0.562565	6.63	0.0171318	NA	19	38	NA
62322_3	107	17weeks	Albino	Katie	5	Leah	Leah	Katie	5	71	60	8	322	4.33	0.0131212	83	8670	0.003	1.283	193.613	NA	173802	0.00275758	0.493266	4.14	0.0125455	NA	20	40	NA
62322_4	107	17weeks	Brown.Hood	Katie	6	Leah	Leah	Katie	6	71.5	102.5	5	314	4.86	0.0152351	78	10012.5	0.00269592	1.546	243.923	NA	229840	0.0031348	0.480468	4.87	0.0152665	NA	20	39	NA
62322_5	107	17weeks	Brown.Hood	Katie	7	Leah	Leah	Katie	7	71.5	73	4	343	4.96	0.0142939	79	9907.5	0.0026513	1.019	135.023	NA	100000	0.00293948	0.524714	5.16	0.0148703	NA	20	38.5	NA
62322_6	107	17weeks	Brown.Hood	Katie	8	Leah	Leah	Katie	8	113	73	6	384	5.7	0.0146154	82	9577.5	0.00305128	1.308	204.405	NA	102146	0.00315385	0.492509	6.82	0.0174872	NA	20.5	40	NA
62323_3	113	17weeks	Brown	Katie	9	Leah	Leah	Katie	9	115	93	5	395	8.01	0.020025	87	9585	0.003325	1.923	278.445	NA	57946	0.002775	0.449742	6.85	0.017125	NA	22	41	NA
62323_4	113	17weeks	Brown.Hood	Katie	10	Leah	Leah	Katie	10	193.5	76	11	314	6.04	0.0185846	90	10350	0.00363077	1.012	155.655	NA	195350	0.00246154	0.510354	5.41	0.0166462	NA	20.5	39	NA
62324_5	114	17weeks	Brown.Hood	Katie	1	Leah	Leah	Katie	1	104.5	108	5	335	5	0.0147059	87	12307.5	0.00305882	0.807	156.803	NA	92739	0.00270588	0.541597	3.35	0.00985294	NA	20	40	NA
62324_6	114	17weeks	Black.Hood	Katie	2	Leah	Leah	Katie	2	64.5	86.5	14	302	3.78	0.011962	82	12277.5	0.00313291	0.944	196.058	NA	58414	0.00367089	0.529441	2.33	0.00737342	NA	18	36	NA
62327_3	79	17weeks	Albino	Katie	3	Leah	Leah	Katie	3	90	84.5	4	375	6.07	0.0160158	80	13785	0.00269129	1.072	240.9	NA	126036	0.00290237	0.517254	4.82	0.0127177	NA	19.5	38.5	NA
62327_4	79	17weeks	Brown.Hood	Katie	4	Leah	Leah	Katie	4	72	90.5	5	378	6.49	0.0169452	79	9795	0.00274151	1.063	308.527	NA	82803	0.00305483	0.519707	5.47	0.014282	NA	21	40	NA
62329_3	85	17weeks	Albino	Katie	5	Leah	Leah	Katie	3	201	32	7	316	3.49	0.010805	71	7800	0.00281734	0.942	195.165	NA	99032	0.00383901	0.547852	4.06	0.0125697	NA	21	39.5	NA
62329_4	85	17weeks	Black.Hood	Katie	6	Leah	Leah	Katie	4	75.5	69.5	-6	343	3.67	0.0108902	80	8347.5	0.00308605	1.302	221.572	NA	106207	0.00344214	0.495614	4.9	0.0145401	NA	20	38.5	NA
62333_3	98	17weeks	Black	Katie	7	Leah	Leah	Katie	7	54	77	10	345	3.74	0.0105352	73	9645	0.00309859	1.212	289.493	NA	120391	0.00259155	0.513657	3.91	0.0110141	NA	20	40	NA
62333_4	98	17weeks	Black.Hood	Katie	8	Leah	Leah	Katie	8	65.5	77.5	-1	310	3.61	0.0116828	80	10140	0.0031068	1.339	226.95	NA	91041	0.00391586	0.492642	3.24	0.0104854	NA	19	37.5	NA
62334_3	100	17weeks	Black.Hood	Katie	5	Leah	Leah	Katie	5	86	75.5	11	295	4.35	0.0142157	84	11745	0.00264706	2.072	178.838	NA	126933	0.00294118	0.446295	3.09	0.010098	NA	18	36.5	NA
62334_4	100	17weeks	Black.Hood	Katie	6	Leah	Leah	Katie	6	145	87	3	322	5.99	0.0184308	80	11295	0.00292308	1.951	309.345	NA	138791	0.00264615	0.455924	3.97	0.0122154	NA	20	39	NA
62335_3	108	17weeks	Brown	Katie	1	Leah	Leah	Katie	1	75	99	16	384	4.09	0.010225	82	9675	0.0031	1.041	313.673	NA	55222	0.0036	0.517795	6.65	0.016625	NA	21.5	39.5	NA
62335_4	108	17weeks	Brown.Hood	Katie	2	Leah	Leah	Katie	2	53.5	79	9	295	3.89	0.0127961	73	9172.5	0.00328947	0.523	132.083	NA	96165	0.00319079	0.632181	4.6	0.0151316	NA	19.5	37	NA
62335_5	108	17weeks	Brown	Jaime	11	Katie	Katie	Katie	11	40.5	78.5	6	340	4.85	0.0140173	69	9847.5	0.00300578	0.553	159.81	NA	77018	0.0032948	0.632281	3.85	0.0111272	NA	22	39	NA
62335_6	108	17weeks	Brown.Hood	Jaime	12	Katie	Katie	Katie	12	47	68	0	291	3.81	0.0130928	67	9030	0.00329897	0.402	142.215	NA	112630	0.00371134	0.699154	2.44	0.00838488	NA	17.5	35	NA
62337_3	111	17weeks	Albino	Katie	7	Leah	Leah	Katie	5	123	57.5	11	333	4.82	0.0140116	72	8887.5	0.00293605	1.788	325.673	NA	141975	0.00235465	0.474001	5.7	0.0165698	NA	19	39	NA
62337_4	111	17weeks	Albino	Katie	8	Leah	Leah	Katie	6	83	57	6	399	4.3	0.0106173	75	8467.5	0.00281481	1.442	317.558	NA	117657	0.00244444	0.491636	5.45	0.0134568	NA	21	41	NA
62338_3	116	17weeks	Black.Hood	Katie	9	Leah	Leah	Katie	7	136.5	81.5	13	371	8.09	0.0210677	98	10440	0.00247396	1.26	245.925	NA	129893	0.00291667	0.478104	6.62	0.0172396	NA	20	37.5	NA
62338_4	116	17weeks	Black.Hood	Katie	10	Leah	Leah	Katie	8	221.5	95	13	362	4.58	0.0122133	89	12322.5	0.0024	1.112	176.993	NA	230329	0.00210667	0.501129	4.53	0.01208	NA	19	37	NA
62339_3	84	17weeks	Black.Hood	Jaime	5	Katie	Katie	Katie	5	83.5	60.5	5	285	3.64	0.0125517	78	8670	0.00262069	1.104	276.562	NA	75800	0.00344828	0.516779	3.53	0.0121724	NA	20	38	NA
62339_4	84	17weeks	Brown.Hood	Jaime	6	Katie	Katie	Katie	6	92.5	62.5	-2	343	4.36	0.0127859	77	8685	0.00278592	0.801	221.287	NA	116881	0.00319648	0.558621	3.43	0.0100587	NA	19	38.5	NA
62339_5	84	17weeks	Black.Hood	Jaime	7	Katie	Katie	Katie	7	69.5	60	6	314	4.78	0.0149375	69	8317.5	0.0025625	0.721	417.308	NA	105120	0.003125	0.58935	3.84	0.012	NA	19.5	38.5	NA
62339_6	84	17weeks	Brown.Hood	Jaime	8	Katie	Katie	Katie	8	83.5	63.5	3	344	5.38	0.0155043	76	10447.5	0.00273775	1.75	436.125	NA	107789	0.00383285	0.470843	5.55	0.0159942	NA	19	38	NA
62341_4	90	17weeks	Brown.Hood	Jaime	10	Katie	Katie	Katie	10	115.5	99	0	350	3.49	0.00997143	90	10102.5	0.003	1.133	228.63	NA	114151	0.00265714	0.497891	3.68	0.0105143	NA	22	41.5	NA
62343_3	96	17weeks	Brown	Jaime	9	Katie	Katie	Katie	9	122	161	4	357	5.93	0.0164266	90	11122.5	0.00299169	1.625	538.485	NA	119066	0.00379501	0.461873	6.37	0.0176454	NA	23	41	NA
62343_4	96	17weeks	Black	Jaime	10	Katie	Katie	Katie	10	103	156.5	1	322	4.37	0.0135294	92	11010	0.00294118	1.605	294.135	NA	156650	0.00247678	0.460986	3.88	0.0120124	NA	19	38.5	NA
62345_3	101	17weeks	Brown.Hood	Jaime	7	Katie	Katie	Katie	7	230	78.5	2	341	6.16	0.0179592	99	14910	0.00291545	3.333	402.428	NA	164879	0.00265306	0.397066	5.45	0.0158892	NA	19	39	NA
62345_4	101	17weeks	Albino	Jaime	8	Katie	Katie	Katie	8	161.5	75.5	-1	341	3.57	0.0105	80	9037.5	0.00305882	1.911	243	NA	124140	0.00335294	0.457802	3.78	0.0111176	NA	21	40	NA
62347_3	110	17weeks	Brown	Jaime	1	Katie	Katie	Katie	1	105	73.5	3	323	7.73	0.0237117	72	8827.5	0.00273006	0.833	173.76	NA	100566	0.00346626	0.562437	5.29	0.016227	NA	19	37.5	NA
62347_4	110	17weeks	Black	Jaime	2	Katie	Katie	Katie	2	58	76.5	6	341	6.82	0.0196542	83	9847.5	0.0029683	1.028	244.583	NA	111633	0.00314121	0.517847	4.77	0.0137464	NA	20	38	NA
62347_5	110	17weeks	Brown	Jaime	3	Katie	Katie	Katie	3	59	53	3	290	4.78	0.016314	72	8902.5	0.00296928	1.01	269.543	NA	95059	0.00290102	0.537157	4.23	0.0144369	NA	21	39	NA
62347_6	110	17weeks	Black	Jaime	4	Katie	Katie	Katie	4	154.5	63	4	339	8.63	0.0251603	77	9525	0.0025656	1.366	387.368	NA	138930	0.00250729	0.494574	5.66	0.0165015	NA	19	38.5	NA
62348_3	112	17weeks	Black	Jaime	5	Katie	Katie	Katie	5	132	59.5	5	309	4.36	0.0138854	71	9795	0.00378981	2.201	341.212	NA	184909	0.00210191	0.455814	5.63	0.0179299	NA	18	37	NA
62348_4	112	17weeks	Black.Hood	Jaime	6	Katie	Katie	Katie	6	50	77	-4	353	3.62	0.0103725	72	10695	0.00335244	0.868	210.27	NA	85293	0.00283668	0.556839	4.01	0.01149	NA	21	41	NA
62349_3	77	17weeks	Albino	Jaime	1	Katie	Katie	Katie	1	125	98	0	297	2.57	0.0086532	79	10890	0.00299663	0.586	232.365	NA	73532	0.00316498	0.600411	2.77	0.0093266	NA	18	36	NA
62349_4	77	17weeks	Black.Hood	Jaime	2	Katie	Katie	Katie	2	209.5	103.5	4	325	4.29	0.0130395	80	11775	0.00306991	0.893	322.05	NA	99263	0.00346505	0.539391	5.76	0.0175076	NA	18	35.5	NA
62349_5	77	17weeks	Albino	Jaime	3	Katie	Katie	Katie	3	164	101.5	-5	280	3.61	0.0131273	82	11572.5	0.00374545	0.825	364.942	NA	169650	0.00290909	0.546368	4.87	0.0177091	NA	18	35	NA
62349_6	77	17weeks	Albino	Jaime	4	Katie	Katie	Katie	4	73.5	87	3	304	2.72	0.00885993	75	9997.5	0.00296417	1.162	322.86	NA	130958	0.00312704	0.515393	3.31	0.0107818	NA	19	37	NA
62352_3	118.5	17weeks	Black.Hood	Katie	11	Leah	Leah	Katie	5	148	97	0	382	9.94	0.0260209	82	12270	0.00306283	1.754	380.933	NA	152721	0.00290576	0.463426	6.48	0.0169634	NA	21	39.5	NA
62352_4	118.5	17weeks	Albino	Katie	6	Leah	Leah	Katie	6	46.5	65	9	320	3.17	0.00963526	71	9540	0.00328267	0.604	135.428	NA	122754	0.00370821	0.612634	1.18	0.00358663	NA	19	39.5	NA
62360_3	128	17weeks	Albino	Katie	1	Leah	Leah	Katie	1	110.5	82.5	7	346	4.97	0.0140793	77	10207.5	0.00339943	2.317	300.555	NA	181714	0.0029745	0.444165	6.39	0.018102	NA	22	39	NA
62360_4	128	17weeks	Brown	Katie	2	Leah	Leah	Katie	2	145	68	5	350	5.51	0.0155211	79	10740	0.00332394	1.818	343.178	NA	80313	0.00323944	0.463559	8.15	0.0229577	NA	21	37.5	NA
62360_5	128	17weeks	Albino	Katie	3	Leah	Leah	Katie	3	111	71	10	347	4.4	0.0123249	93	10702.5	0.00336134	2.179	385.755	NA	148374	0.0029972	0.433512	5.6	0.0156863	NA	20.5	37.5	NA
62360_6	128	17weeks	Black.Hood	Katie	4	Leah	Leah	Katie	4	90	72	-1	338	5.16	0.0153116	78	10350	0.00341246	2.291	307.395	NA	131352	0.00311573	0.444026	6.23	0.0184866	NA	21	37.5	NA
62365_3	97	17weeks	Brown.Hood	Katie	1	Leah	Leah	Katie	1	144.5	110	7	356	5.1	0.0140496	80	9967.5	0.00297521	1.28	212.7	NA	141550	0.00355372	0.497438	5.47	0.0150689	NA	20	39	NA
62365_4	97	17weeks	Brown	Katie	2	Leah	Leah	Katie	2	182	126.5	11	388	7.8	0.0195489	78	9862.5	0.00258145	1.727	420.615	NA	165472	0.00313283	0.469619	7.88	0.0197494	NA	22	42	NA
62372_3	79	17weeks	Albino	Katie	5	Leah	Leah	Katie	5	44.5	67.5	0	334	2.95	0.00883234	95	13965	0.00299401	1.475	240.623	NA	136511	0.00398204	0.465871	2.66	0.00796407	NA	19	39	NA
62372_4	79	17weeks	Brown.Hood	Katie	6	Leah	Leah	Katie	6	57	66	0	331	3.99	0.0120544	89	12442.5	0.00296073	0.979	208.627	NA	94243	0.00323263	0.515418	3.27	0.00987915	NA	21	39	NA
62378_3	105	17weeks	Black.Hood	Katie	1	Leah	Leah	Katie	1	101.5	100.5	9	368	5.94	0.015756	82	10717.5	0.00307692	1.144	283.598	NA	95208	0.00267905	0.507038	6.89	0.0182759	NA	21	40	NA
62378_4	105	17weeks	Brown.Hood	Katie	2	Leah	Leah	Katie	2	110	66.5	7	360	7	0.0190736	81	10027.5	0.00313351	1.406	283.283	NA	127568	0.0040327	0.48627	8.11	0.0220981	NA	19	37	NA
62378_5	105	17weeks	Brown.Hood	Katie	3	Leah	Leah	Katie	3	91.5	74	14	375	7.73	0.0198715	89	12165	0.00280206	3.03	265.808	NA	203633	0.00280206	0.411382	7.44	0.019126	NA	21	40	NA
62378_6	105	17weeks	Brown	Katie	4	Leah	Leah	Katie	4	92.5	72	6	410	8.38	0.0201442	83	10597.5	0.00302885	1.233	338.355	NA	105956	0.00324519	0.497502	9.05	0.0217548	NA	22	43	NA
62380_3	109	17weeks	Brown.Hood	Katie	8	Leah	Leah	Katie	8	55	85	9	301	3.38	0.0109032	77	11227.5	0.00325806	1.079	240.982	NA	103727	0.00283871	0.520966	3.63	0.0117097	NA	21.5	38	NA
62380_4	109	17weeks	Black	Katie	9	Leah	Leah	Katie	9	37.5	64	13	322	4.73	0.0141194	82	11272.5	0.00334328	1.449	261.368	NA	106920	0.00298507	0.481955	4.87	0.0145373	NA	20	39	NA
62380_5	109	17weeks	Brown	Katie	10	Leah	Leah	Katie	10	70.5	91.5	8	355	5.37	0.0147934	79	11520	0.00358127	1.786	222.863	NA	175546	0.00267218	0.465223	6.61	0.0182094	NA	20	38.5	NA
62381_3	113	17weeks	Brown	Katie	7	Leah	Leah	Katie	7	150	106.5	9	406	8.96	0.0215904	92	14287.5	0.00322892	3.681	413.678	NA	178138	0.00383133	0.395295	6.04	0.0145542	NA	22	42	NA
62381_4	113	17weeks	Black.Hood	Katie	8	Leah	Leah	Katie	8	111.5	73.5	-3	329	3.89	0.0119325	84	10792.5	0.00343558	1.434	207.143	NA	146297	0.00309816	0.480578	3.42	0.0104908	NA	18	38	NA
62381_5	113	17weeks	Brown	Katie	9	Leah	Leah	Katie	9	202.5	91	3	324	6.72	0.0205505	90	12150	0.0030581	3.686	397.642	NA	166019	0.00327217	0.3967	5.56	0.0170031	NA	21	39	NA
62381_6	113	17weeks	Black.Hood	Katie	10	Leah	Leah	Katie	10	172	97	0	365	7.32	0.0200548	84	9487.5	0.00309589	3.442	419.498	NA	143338	0.00364384	0.406324	5.77	0.0158082	NA	22	41	NA
62383_3	130	17weeks	Brown	Katie	3	Leah	Leah	Katie	3	111.5	105	0	350	5.44	0.0155429	85	10627.5	0.00377143	1.7	340.08	NA	129565	0.00328571	0.462991	19.18	0.0548	NA	19	38.5	NA
62397_3	145	17weeks	Brown	Katie	7	Leah	Leah	Katie	7	108	104.5	11	341	4.28	0.0121591	83	11700	0.00326705	1.619	202.935	NA	154453	0.00301136	0.469853	5.38	0.0152841	NA	20	40.5	NA
62397_4	145	17weeks	Albino	Katie	8	Leah	Leah	Katie	8	101	87	7	301	2.39	0.00775974	84	9772.5	0.00467532	0.701	88.0125	NA	190947	0.00308442	0.564973	3.42	0.0111039	NA	19	39	NA
62407_3	80	17weeks	Black	Katie	5	Leah	Leah	Katie	5	60	69.5	6	317	3.21	0.00993808	81	12255	0.00325077	1.289	210.465	NA	154731	0.00321981	0.495359	4.25	0.0131579	NA	19	37.5	NA
62407_4	80	17weeks	Black.Hood	Katie	6	Leah	Leah	Katie	6	190.5	108.5	-5	337	5.2	0.0156627	88	14497.5	0.00271084	1.239	240.3	NA	123200	0.00256024	0.490785	5.37	0.0161747	NA	18	36.5	NA
62407_5	80	17weeks	Black.Hood	Katie	7	Leah	Leah	Katie	7	67.5	54.5	9	328	2.47	0.00732938	82	12015	0.00305638	1.013	196.912	NA	140364	0.00293769	0.52099	2.71	0.00804154	NA	20	39	NA
62407_6	80	17weeks	Black	Katie	8	Leah	Leah	Katie	8	102	68.5	5	300	3.8	0.012459	97	12315	0.00304918	0.99	269.108	NA	111469	0.00370492	0.504437	3.78	0.0123934	NA	18	35.5	NA
62408_3	85	17weeks	Albino	Katie	1	Leah	Leah	Katie	8	92	67	0	339	4.16	0.0122714	92	11115	0.00303835	1.608	233.745	NA	93621	0.00342183	0.460814	5.7	0.0168142	NA	20	38.5	NA
62408_4	85	17weeks	Brown.Hood	Katie	11	Leah	Leah	Katie	9	91.5	23	-2	294	3.29	0.0112671	72	8287.5	0.00315068	1.325	258.705	NA	137474	0.00325342	0.505166	5.36	0.0183562	NA	19.5	36	NA
62411_3	94	17weeks	Black	Katie	1	Leah	Leah	Katie	1	308	80.5	24	345	6.86	0.0185908	89	11212.5	0.00279133	4.534	758.947	NA	143107	0.00327913	0.383749	6.48	0.017561	NA	19	37.5	NA
62411_4	94	17weeks	Brown.Hood	Katie	2	Leah	Leah	Katie	2	213	108.5	3	360	5.07	0.0139669	90	10702.5	0.00338843	0.314	67.7775	NA	100449	0.00294766	0.689098	4.82	0.0132782	NA	20	39	NA
62411_5	94	17weeks	Brown.Hood	Katie	12	Leah	Leah	Katie	3	248	107.5	4	424	7.32	0.0171028	85	10770	0.00266355	1.97	381.488	NA	190109	0.00257009	0.449664	10.27	0.0239953	NA	22	40.5	NA
62411_6	94	17weeks	Brown	Katie	4	Leah	Leah	Katie	4	185.5	92.5	10	325	5.8	0.0173134	78	11377.5	0.00474627	2.079	463.035	NA	152432	0.00220896	0.452499	5.62	0.0167761	NA	19	36.5	NA
62414_3	99	17weeks	Brown	Katie	3	Leah	Leah	Katie	5	56	68	22	312	5.22	0.0156287	82	10380	0.00308383	0.92	189.075	NA	68730	0.00344311	0.532594	3.38	0.0101198	NA	22	39	NA
62414_4	99	17weeks	Albino	Katie	4	Leah	Leah	Katie	6	54	76	2	351	5.33	0.0150992	90	11122.5	0.00322946	1.122	240.42	NA	124218	0.00311615	0.498943	4.29	0.012153	NA	20	39.5	NA
62414_5	99	17weeks	Brown	Katie	5	Leah	Leah	Katie	7	39.5	63.5	10	332	6.69	0.0195614	78	10485	0.00312865	1.235	209.76	NA	131057	0.00309942	0.504093	4.37	0.0127778	NA	21	38.5	NA
62414_6	99	17weeks	Black	Katie	6	Leah	Leah	Katie	8	57	66	10	284	4	0.0136054	78	11737.5	0.00316327	0.901	230.565	NA	95074	0.00323129	0.541471	3	0.0102041	NA	19.5	36.5	NA
62415_3	102	17weeks	Brown.Hood	Katie	7	Leah	Leah	Katie	9	184	96	15	395	7.8	0.0190244	101	10710	0.00368293	2.84	404.22	NA	115406	0.00312195	0.406894	8.23	0.0200732	NA	23	43	NA
62415_4	102	17weeks	Brown	Katie	8	Leah	Leah	Katie	10	79	78	9	334	4	0.0116618	93	10485	0.00341108	1.941	345.12	NA	185196	0.00282799	0.443163	4.45	0.0129738	NA	21	40	NA
62417_3	116	17weeks	Brown.Hood	Katie	9	Leah	Leah	Katie	9	82.5	81.5	11	280	2.32	0.00797251	89	11317.5	0.0032646	0.407	109.56	NA	238969	0.00333333	0.641443	1.96	0.0067354	NA	19	35	NA
62417_4	116	17weeks	Black.Hood	Katie	10	Leah	Leah	Katie	10	110.5	89.5	15	345	4.41	0.01225	87	11535	0.00277778	1.079	201.54	NA	182321	0.00311111	0.50696	6.9	0.0191667	NA	21	39	NA
62418_3	154	17weeks	Brown	Katie	9	Leah	Leah	Katie	9	93.5	129.5	17	372	6.95	0.0178663	78	10342.5	0.00311054	1.137	241.072	NA	95256	0.0033162	0.513385	6.91	0.0177635	NA	21	39	NA
62418_4	154	17weeks	Brown.Hood	Katie	12	Leah	Leah	Katie	10	47.5	69.5	1	309	4.39	0.0141613	76	8377.5	0.00309677	0.511	85.215	NA	130078	0.00329032	0.629234	4.24	0.0136774	NA	21	39.5	NA
62420_3	156	17weeks	Black	Katie	5	Leah	Leah	Katie	5	99.5	57	7	328	4.14	0.0123582	78	9277.5	0.00298507	1.739	228.113	NA	132145	0.00247761	0.468956	3.99	0.0119104	NA	21.5	42	NA
62420_4	156	17weeks	Albino	Katie	6	Leah	Leah	Katie	6	159	57	10	331	4.87	0.0142815	84	8595	0.00307918	2.049	305.73	NA	134894	0.0027566	0.447263	5.11	0.0149853	NA	21	41	NA
62422_3	158	17weeks	Brown.Hood	Katie	9	Leah	Leah	Katie	9	69	80	4	317	5.39	0.0167913	79	9090	0.00361371	2.768	407.858	NA	177419	0.00193146	0.427388	5.24	0.016324	NA	21	40	NA
62422_4	158	17weeks	Brown	Katie	10	Leah	Leah	Katie	10	103	66	2	315	4.86	0.0153312	90	9255	0.00299685	0.919	155.798	NA	192882	0.00214511	0.521497	6.58	0.0207571	NA	21	38	NA
62425_3	161	17weeks	Black.Hood	Katie	5	Leah	Leah	Katie	5	132	73	4	343	6.69	0.0192795	76	12150	0.00276657	1.25	278.332	NA	99506	0.00256484	0.505632	5.9	0.0170029	NA	20.5	39	NA
62425_4	161	17weeks	Black.Hood	Katie	6	Leah	Leah	Katie	6	178	73.5	3	368	6.87	0.0185175	88	13260	0.00264151	0.917	330.6	NA	175813	0.00172507	0.524425	7.79	0.0209973	NA	21	39	NA
62426_3	162	17weeks	Black.Hood	Katie	7	Leah	Leah	Katie	7	149	86.5	7	297	2.96	0.00973684	81	9105	0.00319079	0.699	145.357	NA	200989	0.00292763	0.570463	5.33	0.0175329	NA	20	38	NA
62426_4	162	17weeks	Black.Hood	Katie	8	Leah	Leah	Katie	8	227	97.5	9	324	4.42	0.0132733	93	10447.5	0.00288288	1.239	211.252	NA	247914	0.00279279	0.485071	7.24	0.0217417	NA	19	35.5	NA
62432_3	103	17weeks	Black	Katie	9	Leah	Leah	Katie	10	171	143.5	10	304	4.04	0.0128662	87	9465	0.00366242	0.342	93.48	NA	195160	0.00257962	0.678635	5.42	0.0172611	NA	22	39	NA
62432_4	103	17weeks	Brown	Katie	12	Leah	Leah	Katie	11	112	107.5	5	335	4.98	0.0146471	81	10035	0.00429412	1.081	173.16	NA	169391	0.00202941	0.514851	7.2	0.0211765	NA	19	37.5	NA
62434_3	89	17weeks	Brown.Hood	Katie	9	Leah	Leah	Katie	9	99	105.5	18	360	5.2	0.0137566	84	10252.5	0.00425926	2.255	417.983	NA	170909	0.00291005	0.439092	7.93	0.0209788	NA	21	38	NA
62434_4	89	17weeks	Brown	Katie	11	Leah	Leah	Katie	10	102.5	109	5	382	8.17	0.0211111	82	12682.5	0.00366925	1.717	291.48	NA	104448	0.00322997	0.465423	8.3	0.021447	NA	22	39	NA
62436_3	97	17weeks	Brown	Katie	3	Leah	Leah	Katie	3	62.5	87.5	-2	405	5.6	0.0138958	78	12022.5	0.00277916	0.711	144.36	NA	107683	0.00344913	0.573406	5.82	0.0144417	NA	22	42	NA
62436_4	97	17weeks	Brown.Hood	Katie	4	Leah	Leah	Katie	4	63.5	111.5	5	395	4.58	0.01145	83	11137.5	0.0032	1.119	154.665	NA	60632	0.0038	0.508154	3.68	0.0092	NA	23	43	NA
62437_3	91	17weeks	Black.Hood	Katie	1	Leah	Leah	Katie	1	73.5	90	12	280	2.29	0.00784247	91	9870	0.00311644	0.297	NA	NA	131955	0.0030137	0.698423	2.78	0.00952055	NA	19	35.5	NA
62437_4	91	17weeks	Black.Hood	Katie	2	Leah	Leah	Katie	2	62.5	92	13	340	4.19	0.0118697	80	12420	0.00288952	0.7	141.083	NA	179077	0.00331445	0.572021	4.47	0.0126629	NA	21	38.5	NA
62438_3	101	17weeks	Brown	Katie	5	Leah	Leah	Katie	5	192	76	3	317	4.27	0.0133437	93	11917.5	0.003125	4.067	397.598	NA	216293	0.0025625	0.387934	4.14	0.0129375	NA	20	39	NA
62438_5	101	17weeks	Brown	Katie	7	Leah	Leah	Katie	6	125	75.5	2	371	6.54	0.0175335	96	13972.5	0.00313673	3.782	519.278	NA	132618	0.00294906	0.390626	6.78	0.0181769	NA	23	41	NA
62443_3	83	17weeks	Black	Katie	9	Leah	Leah	Katie	9	139.5	71.5	9	274	4.94	0.0174558	79	11617.5	0.00289753	1.395	257.34	NA	132304	0.00279152	0.489668	4.19	0.0148057	NA	20.5	38	NA
62443_4	83	17weeks	Brown.Hood	Katie	10	Leah	Leah	Katie	10	141	77.5	7	273	7.03	0.0251071	72	9285	0.00285714	1.006	243.975	NA	190750	0.00285714	0.537655	5.88	0.021	NA	19.5	35.5	NA
62448_3	107	17weeks	Albino	Katie	5	Leah	Leah	Katie	5	75	73.5	1	283	3.46	0.0121831	72	8955	0.00285211	1.451	182.692	NA	125026	0.00274648	0.495295	3.65	0.0128521	NA	19	36.5	NA
62448_4	107	17weeks	Brown.Hood	Katie	6	Leah	Leah	Katie	6	58.5	85	0	285	3.41	0.0119649	70	10492.5	0.00315789	0.638	172.118	NA	93051	0.00347368	0.60609	4.07	0.0142807	NA	19	36	NA
62449_3	109	17weeks	Brown	Katie	7	Leah	Leah	Katie	7	76	80	3	310	2.91	0.00929712	69	9112.5	0.00361022	1.485	194.887	NA	107118	0.00405751	0.49737	4.29	0.0137061	NA	21	39	NA
62449_4	109	17weeks	Black.Hood	Katie	8	Leah	Leah	Katie	8	88.5	71.5	1	297	4.28	0.0143624	73	8737.5	0.00392617	1.01	194.655	NA	179627	0.00251678	0.535434	4.39	0.0147315	NA	21	38.5	NA
62463_3	112	17weeks	Black	Katie	1	Leah	Leah	Katie	1	146	76.5	-1	348	6.24	0.0179827	83	10785	0.00337176	2.069	378.022	NA	268571	0.00221902	0.44746	7.06	0.0203458	NA	20.5	40	NA
62463_4	112	17weeks	Black.Hood	Katie	2	Leah	Leah	Katie	2	62	57	6	317	2.94	0.00910217	78	9075	0.00340557	0.785	99.1725	NA	148178	0.00417957	0.559608	3.16	0.00978328	NA	19	39	NA
62463_5	112	17weeks	Black.Hood	Katie	3	Leah	Leah	Katie	3	94	79	14	355	4.35	0.0117886	81	9727.5	0.00314363	1.498	223.32	NA	147512	0.00333333	0.479847	5.34	0.0144715	NA	22	42.5	NA
62463_6	112	17weeks	Black.Hood	Katie	4	Leah	Leah	Katie	4	57	59.5	4	350	3.46	0.00977401	70	8655	0.00313559	1.047	234.495	NA	127402	0.0030226	0.53618	4.01	0.0113277	NA	21	41	NA
62471_3	111	17weeks	Albino	Katie	5	Leah	Leah	Katie	5	111.5	66.5	8	343	4.28	0.0121937	83	9517.5	0.00327635	1.677	248.423	NA	122627	0.00290598	0.466503	4.04	0.01151	NA	21	41	NA
62471_4	111	17weeks	Albino	Katie	6	Leah	Leah	Katie	6	80.5	52	0	335	4.2	0.0125373	80	10095	0.00325373	0.617	62.52	NA	147245	0.00316418	0.590537	2.99	0.00892537	NA	21	42.5	NA
62474_3	121	17weeks	Black.Hood	Katie	1	Leah	Leah	Katie	1	279	90.5	5	363	19.1	0.0519022	87	13185	0.00271739	1.747	359.377	NA	86800	0.00326087	0.458335	7.8	0.0211957	NA	19	37.5	NA
62483_3	126	17weeks	Brown	Katie	9	Leah	Leah	Katie	9	77	72.5	2	345	4.55	0.0131124	90	10177.5	0.00325648	1.239	225.083	NA	91811	0.00365994	0.488445	6.26	0.0180403	NA	21	40.5	NA
62485_3	129	17weeks	Albino	Katie	7	Leah	Leah	Katie	7	121.5	87	0	405	9.7	0.0239506	90	12420	0.00338272	1.756	404.707	NA	151756	0.00323457	0.4548	9.41	0.0232346	NA	22	39.5	NA
62485_4	129	17weeks	Brown.Hood	Katie	8	Leah	Leah	Katie	8	138.5	97	-3	340	6.69	0.0198516	87	12922.5	0.00412463	1.669	344.31	NA	165400	0.00237389	0.46254	8.22	0.0243917	NA	23	38	NA
62495_3	136	17weeks	Black	Katie	1	Leah	Leah	Katie	1	205.5	72	7	347	4.37	0.0123446	90	10807.5	0.00276836	2.617	470.835	NA	201125	0.00361582	0.421577	5.82	0.0164407	NA	22	40.5	NA
62495_4	136	17weeks	Albino	Katie	2	Leah	Leah	Katie	2	112.5	73	5	334	4.68	0.0138053	98	10275	0.00303835	1.745	305.88	NA	191659	0.00241888	0.447824	5.27	0.0155457	NA	21	38	NA
62496_3	137	17weeks	Black	Katie	3	Leah	Leah	Katie	3	201	97.5	5	387	6.55	0.0167092	94	10680	0.00272959	2.31	403.02	NA	101673	0.00280612	0.427947	6.82	0.017398	NA	22	39	NA
62496_4	137	17weeks	Albino	Katie	4	Leah	Leah	Katie	4	109	100.5	2	331	4.49	0.0134835	88	10507.5	0.00303303	1.556	265.845	NA	102874	0.00309309	0.468057	4.22	0.0126727	NA	19	36.5	NA
62496_5	137	17weeks	Brown	Katie	5	Leah	Leah	Katie	5	98	90.5	7	362	5.58	0.015122	89	10410	0.00271003	1.276	307.913	NA	100252	0.00300813	0.486561	5.45	0.0147696	NA	21	38.5	NA
62496_6	137	17weeks	Albino	Katie	6	Leah	Leah	Katie	6	85	78.5	3	328	4.3	0.0129909	89	10470	0.00283988	0.882	221.985	NA	78609	0.00347432	0.527744	4.37	0.0132024	NA	19	37.5	NA
62497_3	140	17weeks	Brown	Katie	7	Leah	Leah	Katie	7	57	56.5	-3	365	5.26	0.0145304	85	14070	0.00331492	1.032	209.933	NA	86442	0.00312155	0.514642	3.77	0.0104144	NA	21	41.5	NA
62497_4	140	17weeks	Black.Hood	Katie	8	Leah	Leah	Katie	8	84.5	60	7	331	6.2	0.0183432	88	12390	0.00316568	0.735	119.835	NA	161116	0.00254438	0.552251	5.09	0.0150592	NA	20	39.5	NA
62506_3	122	17weeks	Black	Jaime	1	Katie	Katie	Katie	1	109.5	88	3	359	6.74	0.0186188	81	12097.5	0.00298343	0.928	267.488	NA	86692	0.0029558	0.53304	6.63	0.0183149	NA	19	38.5	NA
62506_4	122	17weeks	Black.Hood	Jaime	2	Katie	Katie	Katie	2	114	80	2	313	5.4	0.0171429	75	10462.5	0.00301587	1.415	381.735	NA	126743	0.00333333	0.493628	5.82	0.0184762	NA	18	36	NA
62507_3	124	17weeks	Brown.Hood	Katie	1	Leah	Leah	Katie	1	102	54.5	6	280	2.55	0.00891608	85	9285	0.00328671	0.836	108.847	NA	84989	0.00325175	0.540066	3.26	0.0113986	NA	21	39	NA
62507_4	124	17weeks	Brown	Katie	2	Leah	Leah	Katie	2	129	71.5	11	254	2.67	0.0100755	85	11610	0.00309434	0.593	133.792	NA	95556	0.00373585	0.587381	4.02	0.0151698	NA	19	36	NA
62507_6	124	17weeks	Brown	Katie	4	Leah	Leah	Katie	4	77	56.5	-1	252	2.17	0.00864542	80	9195	0.00438247	0.53	103.29	NA	116434	0.00330677	0.61449	2.87	0.0114343	NA	20	37	NA
62509_3	139	17weeks	Black	Jaime	5	Katie	Katie	Katie	5	125.5	85	-4	394	7.16	0.018359	85	11512.5	0.00276923	2.08	457.433	NA	101152	0.00320513	0.444942	9.16	0.0234872	NA	22	42	NA
62509_4	139	17weeks	Brown	Jaime	6	Katie	Katie	Katie	6	106.5	84	2	341	5.3	0.0154519	82	9615	0.003207	1.003	225.173	NA	97651	0.00317784	0.522162	2.77	0.0080758	NA	19	39	NA
62511_3	148	17weeks	Brown.Hood	Jaime	3	Katie	Katie	Katie	3	142.5	20	-4	309	3.06	0.0100328	91	11332.5	0.00360656	0.905	222.833	NA	109892	0.00304918	0.522005	3.8	0.012459	NA	20	37	NA
62511_4	148	17weeks	Black.Hood	Jaime	4	Katie	Katie	Katie	4	71	54	4	395	5.17	0.0129574	81	12637.5	0.00285714	0.64	322.402	NA	134044	0.00225564	0.583204	6.91	0.0173183	NA	21	40	NA
62513_3	151	17weeks	Albino	Jaime	7	Katie	Katie	Katie	7	143.5	102.5	-1	363	9.06	0.0250276	86	11550	0.00301105	2.275	524.925	NA	97204	0.0028453	0.436399	8.7	0.0240331	NA	21	38.5	NA
62513_4	151	17weeks	Black	Jaime	8	Katie	Katie	Katie	8	66	89.5	5	350	6.51	0.018338	82	13822.5	0.0028169	0.495	180.105	NA	91671	0.00239437	0.621729	5.92	0.0166761	NA	20	39.5	NA
62514_3	153	17weeks	Brown	Jaime	9	Katie	Katie	Katie	9	58.5	91.5	13	380	5.94	0.0151145	79	10485	0.0029771	2.076	230.325	NA	70462	0.00330789	0.451497	5.01	0.0127481	NA	21	40	NA
62514_4	153	17weeks	Brown.Hood	Jaime	10	Katie	Katie	Katie	10	65	88	15	345	4.53	0.0125833	79	10942.5	0.00288889	1.421	262.342	NA	137978	0.00258333	0.487752	4.01	0.0111389	NA	21	41	NA
62516_3	159	17weeks	Black	Katie	9	Leah	Leah	Katie	9	211	93	6	328	4.73	0.0141617	89	10162.5	0.00359281	1.367	239.88	NA	80031	0.00392216	0.47958	5.21	0.0155988	NA	21	41.5	NA
62516_4	159	17weeks	Black	Katie	10	Leah	Leah	Katie	10	138	113.5	4	353	4.72	0.0132213	90	10530	0.00347339	1.212	243.93	NA	93302	0.00352941	0.490739	5	0.0140056	NA	22	41.5	NA
62520_3	163	17weeks	Brown.Hood	Katie	7	Leah	Leah	Katie	7	99.5	128.5	2	347	3.72	0.010659	94	11700	0.00312321	0.933	235.77	NA	131920	0.00286533	0.514666	5.71	0.016361	NA	21.5	40	NA
62520_4	163	17weeks	Brown.Hood	Katie	8	Leah	Leah	Katie	8	95.5	135	-3	368	4.95	0.0135616	94	13747.5	0.00315068	0.578	131.805	NA	138041	0.00268493	0.57635	5.69	0.015589	NA	22	42	NA
62561_3	128	17weeks	Albino	Katie	5	Leah	Leah	Katie	5	73	89	13	320	3.88	0.0116517	87	11482.5	0.00357357	2.437	284.962	NA	144667	0.00378378	0.429853	3.15	0.00945946	NA	20	38	NA
62561_4	128	17weeks	Black	Katie	6	Leah	Leah	Katie	6	73	122	10	317	3	0.00917431	81	10657.5	0.00360856	2.073	667.763	NA	99232	0.00302752	0.449421	4.51	0.013792	NA	21	39	NA
62561_5	128	17weeks	Albino	Katie	7	Leah	Leah	Katie	7	62.5	100	13	355	4.86	0.0132065	84	9255	0.00375	1.347	442.613	NA	172871	0.00336957	0.486939	4.14	0.01125	NA	22	40	NA
62561_6	128	17weeks	Brown.Hood	Katie	8	Leah	Leah	Katie	8	87.5	105	1	340	4.79	0.0140469	90	10012.5	0.00439883	1.366	247.59	NA	122378	0.00325513	0.478539	6.3	0.0184751	NA	22	40	NA
62562_3	154	17weeks	Brown	Katie	1	Leah	Leah	Katie	1	98.5	88.5	11	327	5.56	0.0164497	71	11535	0.00328402	1.227	181.56	NA	93058	0.00357988	0.515437	4.98	0.0147337	NA	21	41.5	NA
62562_4	154	17weeks	Brown.Hood	Katie	2	Leah	Leah	Katie	2	70.5	115.5	-1	295	3.65	0.012415	86	10732.5	0.00346939	1.738	216.143	NA	134467	0.00363946	0.459866	4.69	0.0159524	NA	20	37	NA
62562_5	154	17weeks	Brown	Katie	3	Leah	Leah	Katie	3	69.5	78.5	0	332	4.36	0.0131325	74	11962.5	0.00307229	1.062	219.938	NA	166600	0.00301205	0.527605	4.15	0.0125	NA	19.5	39	NA
62562_6	154	17weeks	Brown.Hood	Katie	4	Leah	Leah	Katie	4	79.5	72.5	2	360	4.5	0.0124309	85	12000	0.00339779	0.727	65.9025	NA	90752	0.00301105	0.558362	4.7	0.0129834	NA	21	40	NA
62567_3	157	17weeks	Black	Katie	11	Leah	Leah	Katie	11	72.5	106.5	9	343	4.31	0.0122443	89	10170	0.00292614	NA	NA	NA	133638	0.00298295	NA	5.25	0.0149148	NA	21.5	41	NA
62567_4	157	17weeks	Black.Hood	Katie	12	Leah	Leah	Katie	12	67.5	81	6	307	2.15	0.00686901	84	9510	0.00335463	NA	NA	NA	137113	0.00309904	NA	7.62	0.024345	NA	20	39	NA
62569_3	129	17weeks	Black.Hood	Katie	9	Leah	Leah	Katie	9	78.5	109	9	424	6.81	0.0157275	84	11295	0.00374134	2.672	511.455	NA	212619	0.00224018	0.42533	7.81	0.018037	NA	24	40	NA
62569_4	129	17weeks	Albino	Katie	10	Leah	Leah	Katie	10	109	176	11	391	9.6	0.0238806	93	12187.5	0.00365672	2.744	755.145	NA	206919	0.00276119	0.415478	10.8	0.0268657	NA	22	38	NA
62570_3	131	17weeks	Black.Hood	Katie	1	Leah	Leah	Katie	1	124.5	126.5	6	313	3.03	0.00949843	84	10672.5	0.00329154	NA	NA	NA	72640	0.0039185	NA	4.28	0.0134169	NA	19	37	NA
62570_4	131	17weeks	Brown.Hood	Katie	2	Leah	Leah	Katie	2	97	97.5	5	340	4.32	0.0125217	81	10845	0.00324638	NA	NA	NA	108855	0.0037971	NA	5.23	0.0151594	NA	21	39	NA
62577_3	118	17weeks	Black.Hood	Katie	1	Leah	Leah	Katie	1	101	94.5	1	342	3.27	0.00953353	79	14475	0.00314869	0.878	221.197	NA	64974	0.00443149	0.543147	3.86	0.0112536	NA	20	38	NA
62577_4	118	17weeks	Brown.Hood	Katie	2	Leah	Leah	Katie	2	63.5	95	7	356	6.68	0.0184022	78	11182.5	0.0031405	2.423	829.275	NA	113463	0.00338843	0.439281	4.2	0.0115702	NA	20	39	NA
62579_3	135	17weeks	Black	Katie	3	Leah	Leah	Katie	3	88	93.5	10	340	3.55	0.0101429	86	9795	0.0032	NA	NA	NA	137645	0.00354286	NA	3.43	0.0098	NA	19	40	NA
62579_4	135	17weeks	Albino	Katie	4	Leah	Leah	Katie	4	78	140	14	342	3.92	0.0110112	87	11137.5	0.00297753	NA	NA	NA	103395	0.0033427	NA	6.5	0.0182584	NA	21	40.5	NA
62584_3	141	17weeks	Black.Hood	Katie	5	Leah	Leah	Katie	5	62.5	58.5	0	322	3.26	0.0101242	92	9802.5	0.00335404	NA	NA	NA	153464	0.00347826	NA	2.34	0.00726708	NA	20	38	NA
62584_4	141	17weeks	Albino	Katie	6	Leah	Leah	Katie	6	63	62.5	4	319	5.96	0.018452	88	12652.5	0.00362229	NA	NA	NA	126264	0.00328173	NA	4.32	0.0133746	NA	21	38	NA
62584_5	141	17weeks	Brown.Hood	Katie	7	Leah	Leah	Katie	7	62.5	70	2	292	4.07	0.0138435	88	10942.5	0.00360544	NA	NA	NA	132988	0.00289116	NA	2.92	0.00993197	NA	20	37	NA
62584_6	141	17weeks	Black.Hood	Katie	8	Leah	Leah	Katie	8	69	83.5	11	284	3.99	0.0135254	87	13747.5	0.00305085	NA	NA	NA	117531	0.00274576	NA	3.57	0.0121017	NA	18.5	35.5	NA
62585_3	142	17weeks	Albino	Katie	3	Leah	Leah	Katie	3	76	86	7	306	4.4	0.0140575	97	12532.5	0.00354633	1.508	250.05	NA	117800	0.00319489	0.461857	3.95	0.0126198	NA	19.5	37	NA
62585_4	142	17weeks	Black.Hood	Katie	4	Leah	Leah	Katie	4	88	127	0	337	7.88	0.0233828	84	12945	0.00320475	1.496	297.09	NA	139676	0.00219585	0.476369	6.03	0.0178932	NA	19	35.5	NA
62587_3	152	17weeks	Black.Hood	Katie	9	Leah	Leah	Katie	9	83.5	79.5	7	362	5.06	0.0137127	78	12120	0.00333333	NA	NA	NA	188167	0.00260163	NA	5.52	0.0149593	NA	22	40.5	NA
62587_4	152	17weeks	Black.Hood	Katie	10	Leah	Leah	Katie	10	70	39	5	279	2.92	0.0102817	82	9067.5	0.00278169	NA	NA	NA	134384	0.00348592	NA	2.8	0.00985915	NA	20	38	NA
62594_3	126	17weeks	Brown	Katie	1	Leah	Leah	Katie	1	92	95.5	1	362	4.35	0.0119835	95	10080	0.00272727	1.949	285.158	NA	77169	0.00358127	0.441007	4.96	0.0136639	NA	22	42	NA
62594_4	126	17weeks	Albino	Katie	2	Leah	Leah	Katie	2	73.5	76	-3	287	3.58	0.0126056	94	10515	0.00320423	1.705	243.495	NA	80258	0.00327465	0.453545	3.88	0.013662	NA	20	39	NA
62594_5	126	17weeks	Brown	Katie	3	Leah	Leah	Katie	3	52.5	124.5	6	341	5.06	0.0145821	89	10297.5	0.00291066	3.405	360.99	NA	103304	0.00331412	0.402981	7.93	0.022853	NA	21.5	40	NA
62594_6	126	17weeks	Albino	Katie	4	Leah	Leah	Katie	4	73.5	75	-4	368	5.34	0.0146703	90	10702.5	0.00304945	1.983	316.882	NA	66245	0.00381868	0.444135	5.32	0.0146154	NA	23	42	NA
62595_3	138	17weeks	Brown.Hood	Katie	5	Leah	Leah	Katie	5	98	67	8	400	6	0.0147059	85	12337.5	0.00286765	1.185	334.32	NA	150248	0.00335784	0.499217	5.84	0.0143137	NA	23	42	NA
62595_4	138	17weeks	Brown	Katie	6	Leah	Leah	Katie	6	83.5	64	-3	390	5.38	0.0139018	79	11790	0.00260982	1.408	418.995	NA	141869	0.00276486	0.488704	6.57	0.0169767	NA	22	40	NA
62596_3	147	17weeks	Black	Katie	5	Leah	Leah	Katie	5	86.5	150.5	7	391	6.97	0.0175126	88	10755	0.00286432	3.164	371.933	NA	131398	0.00233668	0.409045	9.87	0.024799	NA	21	40	NA
62596_4	147	17weeks	Black	Katie	6	Leah	Leah	Katie	6	88	90.5	3	316	5.44	0.0170533	85	12135	0.00382445	1.134	170.85	NA	103894	0.00354232	0.504024	4.97	0.0155799	NA	21	38	NA
62596_5	147	17weeks	Black.Hood	Katie	7	Leah	Leah	Katie	7	94.5	144	5	325	4.67	0.0141515	87	10320	0.00387879	2.076	NA	NA	55080	0.0030303	0.443116	6	0.0181818	NA	22	38	NA
62596_6	147	17weeks	Black	Katie	8	Leah	Leah	Katie	8	76	92.5	-8	391	6.67	0.0174151	87	10290	0.00342037	1.985	351.675	NA	66073	0.00287206	0.446971	8.5	0.0221932	NA	21	40	NA
62597_3	149	17weeks	Brown.Hood	Katie	10	Leah	Leah	Katie	10	66	67.5	9	370	4.85	0.0127968	89	12615	0.00313984	1.153	208.132	NA	113657	0.00261214	0.497211	4.92	0.0129815	NA	21.5	39.5	NA
62597_4	149	17weeks	Black.Hood	Katie	11	Leah	Leah	Katie	11	69.5	80.5	4	319	5.04	0.0156037	89	12067.5	0.00306502	1.084	215.857	NA	178432	0.00229102	0.503926	4.77	0.0147678	NA	19.5	37.5	NA
62604_3	129	17weeks	Brown.Hood	Katie	9	Leah	Leah	Katie	9	88.5	124	0	399	6	0.0150376	89	12885	0.00393484	1.83	394.267	NA	107845	0.00258145	0.452112	8.9	0.0223058	NA	21	39.5	NA
62604_4	129	17weeks	Brown.Hood	Katie	10	Leah	Leah	Katie	10	85	130	-5	345	5.62	0.0165294	82	9435	0.00397059	1.418	331.575	NA	82017	0.0035	0.484147	6.42	0.0188824	NA	20	38.5	NA
62605_3	134	17weeks	Black.Hood	Katie	11	Leah	Leah	Katie	11	105.5	168	6	368	3.84	0.0102674	81	8632.5	0.00323529	1.577	242.018	NA	63188	0.00355615	0.474762	5.26	0.0140642	NA	21	40	NA
62605_4	134	17weeks	Black.Hood	Katie	12	Leah	Leah	Katie	12	76	121.5	6	382	4.59	0.0118299	81	8632.5	0.00309278	1.437	202.23	NA	185934	0.00234536	0.484041	4.78	0.0123196	NA	22	41	NA
62607_3	145	17weeks	Brown	Katie	1	Leah	Leah	Katie	1	110	163.5	-3	304	2.52	0.00837209	83	12547.5	0.00332226	0.644	207.278	NA	86513	0.00375415	0.578716	4.62	0.0153488	NA	18.5	39.5	NA
62607_4	145	17weeks	Brown.Hood	Katie	2	Leah	Leah	Katie	2	103	154	0	274	4.15	0.015146	87	11580	0.00390511	1.156	296.685	NA	202308	0.00379562	0.499381	5.27	0.0192336	NA	19	38	NA
62608_3	133	17weeks	Black.Hood	Katie	3	Leah	Leah	Katie	3	91.5	113.5	7	300	3.91	0.0127362	84	9900	0.00302932	1.15	236.213	NA	140947	0.00371336	0.503784	3.53	0.0114984	NA	20	37.5	NA
62608_4	133	17weeks	Albino	Katie	4	Leah	Leah	Katie	4	88.5	77.5	5	286	3.37	0.0115808	81	9352.5	0.00357388	0.923	174.157	NA	208930	0.00295533	0.533707	2.92	0.0100344	NA	19	37	NA
62608_5	133	17weeks	Black.Hood	Katie	5	Leah	Leah	Katie	5	83	76.5	12	278	3.43	0.0118276	93	10635	0.00306897	1.476	268.605	NA	176779	0.00265517	0.467821	2.8	0.00965517	NA	20	37.5	NA
62608_6	133	17weeks	Black.Hood	Katie	6	Leah	Leah	Katie	6	84	77	3	292	3.8	0.0128814	87	10320	0.00335593	0.816	182.655	NA	228791	0.00308475	0.540187	2.9	0.00983051	NA	20	37	NA
62611_3	143	17weeks	Albino	Katie	5	Leah	Leah	Katie	4	64	94	8	322	3.91	0.0118485	92	10845	0.00318182	2.338	167.482	NA	36661	0.00330303	0.4287	3.56	0.0107879	NA	18	39.5	NA
62611_4	143	17weeks	Black.Hood	Katie	6	Leah	Leah	Katie	5	61	111	4	340	4.72	0.0137209	85	10042.5	0.00331395	1.452	101.888	NA	74864	0.00235465	0.478152	3.46	0.0100581	NA	20	38.5	NA
62611_5	143	17weeks	Albino	Katie	7	Leah	Leah	Katie	6	114.5	195.5	5	353	5.86	0.0163687	91	10215	0.00343575	1.297	203.993	NA	57458	0.00268156	0.48263	5.1	0.0142458	NA	21	40	NA
62611_6	143	17weeks	Brown.Hood	Katie	8	Leah	Leah	Katie	7	79	251.5	7	278	3.62	0.0127018	88	11310	0.00333333	2.734	371.91	NA	58621	0.00305263	0.419942	3.4	0.0119298	NA	19	39	NA
62612_3	125	17weeks	Black	Katie	7	Leah	Leah	Katie	7	61	157.5	-1	323	3.75	0.011646	81	11925	0.00319876	0.986	186.225	NA	196154	0.00322981	0.525662	4.68	0.0145342	NA	21	40.5	NA
62612_4	125	17weeks	Brown.Hood	Katie	8	Leah	Leah	Katie	8	75.5	104.5	3	344	3.38	0.00974063	84	10597.5	0.00299712	0.57	158.287	NA	179411	0.00273775	0.595183	3	0.00864553	NA	20	39	NA
62613_3	151	17weeks	Black.Hood	Katie	9	Leah	Leah	Katie	9	86	63.5	-4	351	4.93	0.0142075	86	11700	0.00377522	1.436	280.755	NA	168389	0.00325648	0.478091	5.72	0.0164841	NA	20	40	NA
62613_4	151	17weeks	Albino	Katie	10	Leah	Leah	Katie	10	64.5	77.5	-1	374	5.47	0.0146649	82	10410	0.00270777	1.591	365.73	NA	188730	0.00308311	0.472705	5.11	0.0136997	NA	21	41.5	NA
62613_5	151	17weeks	Black.Hood	Katie	11	Leah	Leah	Katie	11	94.5	138	-1	400	10.25	0.0256892	89	10762.5	0.00308271	2.416	546.33	NA	190959	0.00308271	0.428727	10.28	0.0257644	NA	22	41	NA
62613_6	151	17weeks	Black	Katie	12	Leah	Leah	Katie	12	81	91.5	-8	353	7.46	0.0216232	80	9375	0.00301449	1.942	320.88	NA	305650	0.00231884	0.456342	6.85	0.0198551	NA	19	37	NA
62615_3	118	17weeks	Brown.Hood	Katie	1	Leah	Leah	Katie	1	77	65	-2	316	3.31	0.0105414	93	12727.5	0.00296178	1.862	327.21	NA	75639	0.00388535	0.446735	2.5	0.00796178	NA	20	39	NA
62618_3	127	17weeks	Brown.Hood	Katie	3	Leah	Leah	Katie	3	70.5	121.5	-5	319	3.4	0.010828	84	10260	0.00343949	2.628	381.75	NA	38579	0.00340764	0.426639	3.71	0.0118153	NA	20.5	39	NA
62618_4	127	17weeks	Brown	Katie	13	Leah	Leah	Katie	4	84.5	157	-6	307	4.41	0.0146512	77	9442.5	0.00322259	1.373	193.02	NA	174483	0.00289037	0.494032	4.64	0.0154153	NA	20.5	39	NA
62631_3	120	17weeks	Black	Katie	5	Katie	Katie	Katie	5	95	142	4	306	6.28	0.0202581	83	11115	0.00277419	2.166	447.743	NA	195475	0.00319355	0.443511	6.11	0.0197097	NA	21	38	NA
62631_4	120	17weeks	Black.Hood	Katie	6	Katie	Katie	Katie	6	110	174.5	-2	301	5.87	0.0196321	81	10830	0.00304348	2.012	443.1	NA	188615	0.00304348	0.452056	4.13	0.0138127	NA	21	38	NA
62633_3	129	17weeks	Albino	Katie	1	Leah	Leah	Katie	1	102.5	189	2	345	6.85	0.0197406	85	10027.5	0.00409222	1.799	319.11	NA	78615	0.00299712	0.457781	5.5	0.0158501	NA	21	39	NA
62633_4	129	17weeks	Black.Hood	Katie	2	Leah	Leah	Katie	2	83.5	138	9	354	4.8	0.0132231	83	10425	0.00432507	1.527	360.51	NA	84000	0.00333333	0.47553	6.51	0.0179339	NA	20	38	NA
62634_3	132	17weeks	Black.Hood	Katie	7	Leah	Leah	Katie	7	101	120	6	350	4.7	0.0132022	83	10305	0.00294944	0.782	81.345	NA	71393	0.00314607	0.55179	5.79	0.016264	NA	21	39.5	NA
62635_3	134	17weeks	Black.Hood	Katie	3	Leah	Leah	Katie	3	92.5	102	7	322	3.47	0.0105471	89	9142.5	0.00316109	1.074	142.605	NA	90272	0.00379939	0.50495	3.49	0.0106079	NA	20	39	NA
62635_4	134	17weeks	Black.Hood	Katie	4	Leah	Leah	Katie	4	82.5	84.5	-4	387	6.32	0.0165013	87	9705	0.00342037	0.404	107.01	NA	66168	0.00279373	0.646872	4.95	0.0129243	NA	22	42	NA
62636_3	150	17weeks	Black.Hood	Katie	9	Katie	Katie	Katie	9	85.5	186	3	425	10.11	0.0236215	84	10582.5	0.00296729	2.169	345.855	NA	435859	0.00198598	0.442372	9.02	0.0210748	NA	24	42	NA
62636_4	150	17weeks	Black.Hood	Katie	10	Katie	Katie	Katie	10	93.5	225.5	0	380	6.95	0.0182895	86	12120	0.00281579	1.781	259.725	NA	267170	0.00278947	0.457632	7.97	0.0209737	NA	22	39.5	NA
62638_3	158	17weeks	Black	Katie	11	Katie	Katie	Katie	11	69	116.5	-4	364	7.63	0.0211944	90	9352.5	0.00322222	3.181	NA	NA	309861	0.00280556	0.407033	8.19	0.02275	NA	21	41.5	NA
62638_4	158	17weeks	Brown.Hood	Katie	12	Katie	Katie	Katie	12	89.5	169.5	-3	328	4.82	0.0148308	86	9472.5	0.00372308	3.634	601.133	NA	494411	0.00224615	0.40082	6.37	0.0196	NA	22.5	41	NA
62640_3	160	17weeks	Black.Hood	Katie	13	Leah	Leah	Katie	11	89	108	-10	295	3.58	0.0125614	85	9810	0.00312281	0.969	227.415	NA	117700	0.00280702	0.521991	3.9	0.0136842	NA	20	38	NA
62640_4	160	17weeks	Black	Katie	8	Katie	Katie	Katie	8	91.5	254.5	-2	257	3.63	0.0142353	91	11497.5	0.00278431	1.786	334.095	NA	242471	0.00266667	0.4523	3.56	0.0139608	NA	18	36	NA
62641_3	123	17weeks	Brown.Hood	Katie	13	Leah	Leah	Katie	13	77.5	80.5	-2	350	4.3	0.0123563	73	8227.5	0.00293103	0.969	227.415	NA	110923	0.00298851	0.540644	5.19	0.0149138	NA	19	37	NA
62641_4	123	17weeks	Black.Hood	Katie	10	Leah	Leah	Katie	14	74.5	75	11	341	3.58	0.0101705	77	8655	0.00329545	1.709	247.748	NA	111636	0.0028125	0.471869	3.47	0.00985795	NA	23	42	NA
62642_3	127	17weeks	Albino	Katie	7	Leah	Leah	Katie	7	72	67	8	331	3.77	0.0111209	75	8730	0.00342183	1.822	261.15	NA	61246	0.00359882	0.46825	3.9	0.0115044	NA	20	39.5	NA
62642_4	127	17weeks	Brown.Hood	Katie	8	Leah	Leah	Katie	8	94	116.5	9	316	4.45	0.0136923	87	8340	0.00316923	2.145	293.22	NA	113814	0.00264615	0.440345	4.29	0.0132	NA	21	38.5	NA
62647_3	137	17weeks	Brown	Katie	1	Leah	Leah	Katie	1	97.5	131.5	3	371	4.17	0.0111497	84	10492.5	0.00270053	2.139	368.108	NA	97391	0.00307487	0.443559	6.51	0.0174064	NA	19	39	NA
62647_4	137	17weeks	Black	Katie	2	Leah	Leah	Katie	2	116.5	274.5	0	381	6.91	0.0181365	94	10192.5	0.00288714	2.306	448.29	NA	51186	0.00309711	0.428085	8.64	0.0226772	NA	20.5	40	NA
62649_3	147	17weeks	Black	Katie	11	Leah	Leah	Katie	9	85.5	166	3	323	5.84	0.0179141	84	10605	0.00312883	0.724	68.3325	NA	88722	0.00220859	0.560533	6.5	0.0199387	NA	22	38	NA
62651_3	149	17weeks	Black.Hood	Katie	3	Leah	Leah	Katie	3	64	119.5	2	307	5.64	0.0182524	75	12892.5	0.00275081	1.224	275.092	NA	76427	0.00333333	0.509465	4.32	0.0139806	NA	21	38	NA
62651_4	149	17weeks	Brown.Hood	Katie	4	Leah	Leah	Katie	4	85	131.5	8	270	5.52	0.0198561	88	10822.5	0.00302158	1.141	182.25	NA	151800	0.0028777	0.499558	4.64	0.0166906	NA	19	35	NA
62652_3	152	17weeks	Black.Hood	Katie	5	Leah	Leah	Katie	5	61	70	0	329	6	0.0182371	86	10275	0.00276596	1.877	273.428	NA	118517	0.00270517	0.452906	5.04	0.0153191	NA	21	40	NA
62652_4	152	17weeks	Brown.Hood	Katie	6	Leah	Leah	Katie	6	75	114.5	0	345	4.95	0.0143478	76	8850	0.00295652	1.616	291.195	NA	121579	0.0022029	0.47864	3.98	0.0115362	NA	22	41	NA
62653_3	160	17weeks	Black.Hood	Katie	3	Leah	Leah	Katie	3	96	172.5	0	277	3.24	0.0116968	86	11272.5	0.00277978	0.973	117.225	NA	137211	0.00274368	0.520126	3.33	0.0120217	NA	19	36	NA
62653_4	160	17weeks	Black	Katie	4	Leah	Leah	Katie	4	76	144.5	7	335	5.3	0.0154971	85	9585	0.00307018	1.493	183.292	NA	201800	0.00233918	0.475403	5.56	0.0162573	NA	21	40	NA
62655_3	117	17weeks	Brown.Hood	Katie	3	Leah	Leah	Katie	3	102	128	4	403	6.14	0.015086	86	12645	0.00282555	1.637	345.082	NA	77460	0.00336609	0.465431	10.61	0.0260688	NA	22	41	NA
62655_4	117	17weeks	Brown.Hood	Katie	4	Leah	Leah	Katie	4	87	149	3	317	5.09	0.0159063	79	11115	0.003125	2.683	419.235	NA	151508	0.00203125	0.429877	5.59	0.0174688	NA	19	36.5	NA
62658_3	142	17weeks	Brown.Hood	Katie	1	Leah	Leah	Katie	1	85	153.5	7	316	5.22	0.016161	87	10815	0.00309598	3.182	420.382	NA	93818	0.00272446	0.409464	5.12	0.0158514	NA	19	37.5	NA
62658_4	142	17weeks	Albino	Katie	2	Leah	Leah	Katie	2	66	175	9	317	6.25	0.0191718	93	11512.5	0.00322086	2.603	364.567	NA	114202	0.00273006	0.419471	6.3	0.0193252	NA	22	40	NA
62661_3	157	17weeks	Black	Katie	11	Leah	Leah	Katie	11	70	107	4	365	4.54	0.0123035	73	10365	0.00338753	1.724	236.333	NA	122350	0.00216802	0.476222	5.75	0.0155827	NA	21	40.5	NA
62661_4	157	17weeks	Black.Hood	Katie	12	Leah	Leah	Katie	12	61.5	82.5	2	319	2.88	0.00897196	81	10725	0.00383178	1.831	258.353	NA	111600	0.00280374	0.46058	3.95	0.0123053	NA	22	40.5	NA
62663_3	163	17weeks	Brown.Hood	Katie	9	Leah	Leah	Katie	9	101.5	150.5	4	301	3.91	0.0128197	87	10717.5	0.00308197	2.711	376.755	NA	135314	0.00229508	0.42147	10.89	0.0357049	NA	22	39	NA
62663_4	163	17weeks	Albino	Katie	10	Leah	Leah	Katie	10	106	90.5	-7	312	3.5	0.0114754	88	12135	0.00337705	1.059	144.705	NA	132430	0.00304918	0.507774	5.32	0.0174426	NA	20	39	NA
62666_3	124	17weeks	Brown.Hood	Katie	9	Leah	Leah	Katie	9	72	117	7	300	2.97	0.00967427	74	8332.5	0.00348534	2.122	213.855	NA	131652	0.00374593	0.455378	3.6	0.0117264	NA	19	38	NA
62666_4	124	17weeks	Brown.Hood	Katie	10	Leah	Leah	Katie	10	78	140	11	317	2.66	0.00810976	82	8445	0.00335366	2.314	304.312	NA	87388	0.00259146	0.438947	5.1	0.0155488	NA	22	40.5	NA
62667_3	126	17weeks	Brown.Hood	Katie	1	Leah	Leah	Katie	1	31	168.5	6	271	3.34	0.0120578	86	9637.5	0.00306859	1.536	236.032	NA	74376	0.00364621	0.4715	3.19	0.0115162	NA	20	38	NA
62667_4	126	17weeks	Brown.Hood	Katie	2	Leah	Leah	Katie	2	88.5	140.5	8	320	4.69	0.0142988	95	10215	0.00304878	1.573	227.685	NA	87236	0.00271341	0.459886	5.93	0.0180793	NA	21	39	NA
62669_3	159	17weeks	Black	Katie	5	Leah	Leah	Katie	5	132.5	142	6	363	3.92	0.0106233	75	10252.5	0.00325203	0.827	218.52	NA	83742	0.00336043	0.557859	5.32	0.0144173	NA	21	41	NA
62669_4	159	17weeks	Black.Hood	Katie	6	Leah	Leah	Katie	6	75.5	89	18	353	4.03	0.0108625	76	14565	0.00374663	0.933	151.395	NA	127243	0.00299191	0.540337	3.83	0.0103235	NA	22	43	NA
62669_5	159	17weeks	Black	Katie	7	Leah	Leah	Katie	7	92.5	77	5	347	5.47	0.0155398	79	11415	0.00346591	0.889	231.03	NA	146800	0.00284091	0.541557	4.62	0.013125	NA	21.5	41	NA
62669_6	159	17weeks	Black	Katie	8	Leah	Leah	Katie	8	81.5	301.5	3	322	6.03	0.0185538	85	10567.5	0.00366154	2.165	367.08	NA	241333	0.00203077	0.441525	7.06	0.0217231	NA	18	38	NA
62672_3	123	17weeks	Brown.Hood	Katie	1	Leah	Leah	Katie	1	64.5	185	12	431	9.71	0.0219187	94	10065	0.00273138	5.385	683.183	NA	174824	0.00306998	0.36978	8.09	0.0182619	NA	23	41.5	NA
62672_4	123	17weeks	Black.Hood	Katie	2	Leah	Leah	Katie	2	77	103.5	10	361	6.11	0.016469	74	8497.5	0.00280323	2.299	521.37	NA	91364	0.0028841	0.448276	7.98	0.0215094	NA	21	40.5	NA
62675_4	136	17weeks	Black	Katie	12	Leah	Leah	Katie	12	70.5	154.5	14	391	6.11	0.0150864	83	11610	0.00266667	1.97	412.845	NA	214514	0.00259259	0.451764	6.36	0.0157037	NA	21	38.5	NA
62677_3	140	17weeks	Brown	Katie	3	Leah	Leah	Katie	3	79.5	73	-3	311	4.41	0.0143182	81	9765	0.00292208	1.8	183.765	NA	166762	0.00272727	0.462159	2.97	0.00964286	NA	21	39.5	NA
62677_4	140	17weeks	Black.Hood	Katie	4	Leah	Leah	Katie	4	64.5	65	1	325	4.49	0.013773	85	11227.5	0.00312883	1.4	220.44	NA	133136	0.00248466	0.481801	3.71	0.0113804	NA	21	39.5	NA
62678_3	141	17weeks	Brown.Hood	Katie	9	Leah	Leah	Katie	7	72	102.5	1	295	4.01	0.0135473	90	12652.5	0.00307432	1.824	250.748	NA	66257	0.00341216	0.451413	3.38	0.0114189	NA	20	37.5	NA
62678_4	141	17weeks	Brown.Hood	Katie	10	Leah	Leah	Katie	8	68.5	129.5	2	275	4.6	0.0166065	74	10080	0.0033935	2.524	333.442	NA	107423	0.00350181	0.440272	4.25	0.015343	NA	19	37	NA
62678_5	141	17weeks	Brown.Hood	Katie	11	Leah	Leah	Katie	9	73	99.5	-1	253	3.82	0.0151587	84	12060	0.00305556	1.484	191.55	NA	91814	0.0034127	0.477165	2.85	0.0113095	NA	18	34	NA
62678_6	141	17weeks	Albino	Katie	12	Leah	Leah	Katie	10	64	101	-8	312	4.93	0.0162171	90	13305	0.00358553	1.423	166.238	NA	171160	0.00266447	0.474508	3.84	0.0126316	NA	19	37	NA
62679_3	145	17weeks	Black	Katie	5	Leah	Leah	Katie	5	109	130.5	1	347	4.13	0.0118678	87	8542.5	0.00321839	3.842	444.712	NA	112613	0.00318966	0.396184	5.43	0.0156034	NA	20	40	NA
62679_4	145	17weeks	Albino	Katie	6	Leah	Leah	Katie	6	124	190	1	357	4.69	0.0131006	83	12675	0.00349162	1.109	71.73	NA	262154	0.0025419	0.509162	6.63	0.0185196	NA	20	40.5	NA
62680_3	147	17weeks	Black	Katie	5	Leah	Leah	Katie	5	89	163	1	353	7.84	0.0221469	88	11055	0.0030226	4.509	574.86	NA	146667	0.00211864	0.384828	8.3	0.0234463	NA	21.5	39.5	NA
62680_4	147	17weeks	Black.Hood	Katie	6	Leah	Leah	Katie	6	76.5	97.5	5	349	5.56	0.0157062	88	10372.5	0.00319209	2.663	380.408	NA	164658	0.00206215	0.421967	6.67	0.0188418	NA	21	39	NA
62681_3	150	17weeks	Black	Katie	7	Leah	Leah	Katie	7	77	150	3	464	9.61	0.0205782	87	11265	0.00282655	2.289	348.368	NA	132921	0.00297645	0.434941	8.46	0.0181156	NA	23	42	NA
62681_4	150	17weeks	Black.Hood	Katie	8	Leah	Leah	Katie	8	60	148	3	453	10.7	0.0234649	91	11385	0.00285088	1.705	300.135	NA	240346	0.00177632	0.456461	8.09	0.0177412	NA	21	41.5	NA
62683_3	155	17weeks	Brown	Katie	13	Leah	Leah	Katie	9	66.5	73	2	319	3.77	0.0117445	73	11977.5	0.00267913	0.489	75.6375	NA	137933	0.00277259	0.644068	7.72	0.0240498	NA	21	39	NA
62683_4	155	17weeks	Albino	Katie	8	Leah	Leah	Katie	10	77	80	9	322	4.99	0.0150755	77	9270	0.00271903	2.339	333.082	NA	167798	0.00299094	0.443357	5.19	0.0156798	NA	21	40	NA
62684_3	117	17weeks	Black.Hood	Katie	7	Leah	Leah	Katie	5	118.5	212	5	357	6.94	0.0191713	86	10560	0.00276243	1.165	246.817	NA	93755	0.00383978	0.499794	6.14	0.0169613	NA	22	40	NA
62684_4	117	17weeks	Brown.Hood	Katie	8	Leah	Leah	Katie	6	72.5	167.5	5	295	4.21	0.0140333	86	12465	0.00286667	0.916	149.01	NA	134065	0.0031	0.527317	4.03	0.0134333	NA	21	39	NA
62685_3	118	17weeks	Brown.Hood	Katie	3	Leah	Leah	Katie	1	77	118	9	353	6.2	0.0171271	92	13102.5	0.00267956	1.537	320.752	NA	171623	0.00292818	0.465016	5.1	0.0140884	NA	22	40	NA
62685_4	118	17weeks	Black.Hood	Katie	4	Leah	Leah	Katie	2	98	159	15	337	3.56	0.0101136	99	13905	0.00318182	1.693	282.428	NA	128633	0.00448864	0.449581	4.13	0.011733	NA	19	38.5	NA
62686_3	121	17weeks	Black	Katie	11	Leah	Leah	Katie	11	63	144	8	313	6.51	0.0202804	92	11617.5	0.00283489	1.666	331.425	NA	250341	0.00255452	0.457569	6.78	0.0211215	NA	20	37	NA
62686_4	121	17weeks	Black.Hood	Katie	2	Leah	Leah	Katie	12	72.5	318	19	329	6.95	0.0199713	92	11625	0.00244253	3.172	546.06	NA	187912	0.00261494	0.40566	8	0.0229885	NA	21	38	NA
62692_3	142	17weeks	Albino	Katie	5	Leah	Leah	Katie	3	75	140.5	-2	332	5.05	0.015303	98	12420	0.00287879	1.893	274.762	NA	148076	0.00318182	0.440844	4.84	0.0146667	NA	22	40	NA
62692_4	142	17weeks	Brown	Katie	6	Leah	Leah	Katie	4	62.5	112	5	309	5.52	0.0175796	87	11302.5	0.0033758	2.585	373.8	NA	173432	0.00302548	0.425174	3.9	0.0124204	NA	19	38	NA
62695_4	153	17weeks	Brown.Hood	Katie	10	Leah	Leah	Katie	8	83.5	96.5	7	356	4.67	0.012865	78	10282.5	0.00275482	1.363	219.037	NA	212364	0.00333333	0.49344	4.95	0.0136364	NA	22	41	NA
62700_3	157	17weeks	Albino	Katie	12	Leah	Leah	Katie	13	57.5	45	6	332	3.9	0.0115385	76	8887.5	0.00301775	0.72	81.39	NA	164371	0.00286982	0.575326	3.09	0.00914201	NA	21	39.5	NA
62700_4	157	17weeks	Black	Katie	12	Leah	Leah	Katie	14	54	67.5	12	325	3.4	0.010089	76	9870	0.0035905	1.563	228.6	NA	182095	0.00249258	0.481981	3.49	0.0103561	NA	22	41.5	NA
62718_3	134	17weeks	Black.Hood	Katie	7	Leah	Leah	Katie	7	87	156	12	359	5.76	0.0155256	89	10087.5	0.00307278	1.196	75.915	NA	182813	0.00245283	0.49331	6.26	0.0168733	NA	21	42	NA
62718_4	134	17weeks	Black.Hood	Katie	8	Leah	Leah	Katie	8	99.5	260	19	356	5.49	0.01464	87	8962.5	0.00293333	1.216	116.37	NA	114679	0.00298667	0.493961	5.45	0.0145333	NA	20	38	NA
62720_3	125	17weeks	Brown	Katie	3	Leah	Leah	Katie	3	75	92	16	350	6.17	0.0168579	92	9397.5	0.00240437	0.928	195.877	NA	167026	0.00314208	0.517776	6.98	0.019071	NA	22	40	NA
62720_4	125	17weeks	Brown.Hood	Katie	4	Leah	Leah	Katie	4	47	155.5	8	356	5.98	0.0164286	83	11317.5	0.00255495	1.794	341.168	NA	168180	0.00304945	0.460214	7.81	0.021456	NA	21	39	NA
62721_3	154	17weeks	Brown	Katie	1	Leah	Leah	Katie	1	78	87	8	385	6.19	0.0157506	90	9772.5	0.00315522	2.543	264.562	NA	140727	0.00251908	0.423803	8.08	0.0205598	NA	22	40	NA
62721_4	154	17weeks	Brown	Katie	2	Leah	Leah	Katie	2	75	59.5	25	377	6.28	0.0156219	79	10462.5	0.00298507	1.081	234.653	NA	158071	0.00278607	0.517745	8.4	0.0208955	NA	22	42	NA
62724_3	160	17weeks	Black.Hood	Katie	5	Leah	Leah	Katie	5	83	138	11	224	3.7	0.0157447	94	9765	0.00306383	0.721	142.17	NA	185211	0.00323404	0.546131	3.16	0.0134468	NA	17	33	NA
62724_4	160	17weeks	Black	Katie	6	Leah	Leah	Katie	6	84.5	108	6	274	3.07	0.0109643	87	10950	0.00267857	0.807	152.393	NA	199048	0.003	0.541597	3.89	0.0138929	NA	19	35	NA
62725_3	121	17weeks	Brown	Katie	5	Leah	Leah	Katie	5	89.5	164.5	-2	314	6.25	0.0200321	93	11040	0.00282051	0.216	229.395	NA	160078	0.00330128	0.767497	6.52	0.0208974	NA	20	37.5	NA
62725_4	121	17weeks	Brown.Hood	Katie	6	Leah	Leah	Katie	6	72	121	7	291	4.23	0.0141946	82	10672.5	0.00305369	0.495	133.56	NA	199953	0.00285235	0.621729	4.67	0.0156711	NA	19	37	NA
62726_3	128	17weeks	Albino	Katie	1	Leah	Leah	Katie	1	76.5	101	13	353	4.98	0.0136066	81	8392.5	0.00311475	1.333	280.942	NA	102048	0.0034153	0.491808	6.79	0.0185519	NA	20	39	NA
62727_3	147	17weeks	Black.Hood	Katie	6	Leah	Leah	Katie	6	98.5	177.5	-1	411	8.37	0.0204146	90	14182.5	0.00331707	1.542	379.95	NA	164519	0.00187805	0.466782	12.37	0.0301707	NA	22	41.5	NA
62728_3	131	17weeks	Black.Hood	Katie	8	Leah	Leah	Katie	8	85.5	61	8	336	3.03	0.00880814	75	8220	0.00322674	1.214	255.173	NA	150743	0.00305233	0.510392	4.5	0.0130814	NA	21	40	NA
62728_4	131	17weeks	Black.Hood	Katie	9	Leah	Leah	Katie	9	108	98.5	9	345	3.44	0.00971751	87	8535	0.00338983	1.169	265.41	NA	130689	0.00344633	0.498173	6.18	0.0174576	NA	21	39.5	NA
62728_5	131	17weeks	Black.Hood	Katie	7	Leah	Leah	Katie	7	132.5	110	-2	367	4.17	0.0114247	76	11632.5	0.0039726	0.893	240.81	NA	97724	0.00336986	0.545951	7.35	0.020137	NA	21	39	NA
62731_3	135	17weeks	Black	Katie	1	Leah	Leah	Katie	1	118.5	428.5	11	400	7.6	0.0184915	89	10462.5	0.00279805	2.209	415.373	NA	276397	0.00343066	0.435999	9.05	0.0220195	NA	21	42	NA
62731_4	135	17weeks	Black	Katie	2	Leah	Leah	Katie	2	102.5	222	14	345	5.01	0.0139554	87	10425	0.0029805	1.861	298.545	NA	189246	0.00339833	0.452639	6.3	0.0175487	NA	20	38	NA
62732_3	139	17weeks	Brown	Katie	7	Leah	Leah	Katie	7	74	96.5	2	385	7	0.0180879	85	9877.5	0.00276486	1.638	327.06	NA	150000	0.00310078	0.466476	7.02	0.0181395	NA	23	42	NA
62732_4	139	17weeks	Black	Katie	8	Leah	Leah	Katie	8	87.5	82.5	-4	417	10.25	0.0248184	88	10567.5	0.00302663	1.37	351.33	NA	272868	0.00256659	0.480491	8.72	0.0211138	NA	24	44	NA
62733_3	140	17weeks	Brown	Katie	3	Leah	Leah	Katie	3	62	43.5	7	322	4.42	0.0134347	92	8775	0.00337386	0.869	186.562	NA	217278	0.00294833	0.525539	2.24	0.00680851	NA	19	37.5	NA
62733_5	140	17weeks	Brown	Katie	4	Leah	Leah	Katie	4	54	61	7	344	5.85	0.0166667	87	9457.5	0.00299145	1.271	261.562	NA	279389	0.00205128	0.489317	4.6	0.0131054	NA	20	38	NA
62733_6	140	17weeks	Brown.Hood	Katie	5	Leah	Leah	Katie	5	74.5	68	-1	293	4.09	0.0140068	82	9487.5	0.00318493	1.148	273.382	NA	220143	0.00287671	0.506648	2.6	0.00890411	NA	18	37	NA
62734_3	143	17weeks	Albino	Katie	3	Leah	Leah	Katie	3	77.5	115.5	-3	348	5.82	0.0168696	91	11655	0.00365217	3.129	501.142	NA	204913	0.00266667	0.407424	5	0.0144928	NA	19	39.5	NA
62734_4	143	17weeks	Brown.Hood	Katie	4	Leah	Leah	Katie	4	71.5	135.5	6	366	5.94	0.0159677	91	11010	0.00306452	2.246	306.007	NA	144301	0.0025	0.432816	5.61	0.0150806	NA	22	41.5	NA
62762_3	148	17weeks	Albino	Katie	9	Leah	Leah	Katie	9	70.5	130.5	3	394	4.39	0.0110579	87	11895	0.00279597	1.47	253.748	NA	138857	0.00282116	0.474645	5.61	0.014131	NA	22	41	NA
62762_4	148	17weeks	Brown.Hood	Katie	10	Leah	Leah	Katie	10	19.5	149	0	202	1.17	0.00579208	70	8737.5	0.00381188	0.503	121.395	NA	125862	0.00287129	0.646552	1.39	0.00688119	NA	16	32	NA
62763_3	152	17weeks	Black.Hood	Katie	1	Leah	Leah	Katie	1	99	86	-7	329	4.39	0.0136335	87	9300	0.00304348	1.223	175.748	NA	161213	0.00276398	0.493353	3.71	0.0115217	NA	20	37.5	NA
62763_4	152	17weeks	Black.Hood	Katie	2	Leah	Leah	Katie	2	77	44.5	0	354	7.44	0.0210169	79	11070	0.00288136	0.948	280.702	NA	223724	0.00245763	0.533494	5.05	0.0142655	NA	20	38	NA
62764_3	153	17weeks	Brown	Katie	11	Leah	Leah	Katie	11	70	64.5	8	349	3.94	0.0110364	86	9082.5	0.00263305	1.424	283.05	NA	150385	0.00291317	0.478925	4.32	0.0121008	NA	22	40	NA
62764_4	153	17weeks	Brown.Hood	Katie	12	Leah	Leah	Katie	12	76	81.5	7	385	6.89	0.0175765	90	9532.5	0.00270408	1.72	291.675	NA	225592	0.00262755	0.456669	5.27	0.0134439	NA	21	40.5	NA
62765_3	157	17weeks	Albino	Katie	3	Leah	Leah	Katie	3	56	57.5	-2	317	3.11	0.00987302	85	9990	0.00349206	1.22	166.882	NA	116923	0.00330159	0.496086	2.96	0.00939683	NA	19	38	NA
62765_4	157	17weeks	Black	Katie	4	Leah	Leah	Katie	4	62.5	67.5	-6	218	4.29	0.0202358	81	10320	0.00386792	0.639	80.7075	NA	127512	0.00386792	0.583435	2.05	0.00966981	NA	17	34.5	NA
62769_3	120	17weeks	Black	Katie	5	Leah	Leah	Katie	5	81	102.5	5	304	6.35	0.0205502	83	11715	0.00252427	1.095	161.835	NA	118816	0.00317152	0.510597	3.83	0.0123948	NA	19	36.5	NA
62769_4	120	17weeks	Black.Hood	Katie	6	Leah	Leah	Katie	6	85.5	94.5	2	311	6.66	0.021278	90	10620	0.0028754	1.831	268.08	NA	168082	0.00313099	0.451074	3.72	0.011885	NA	20	38	NA
62769_5	120	17weeks	Black	Katie	7	Leah	Leah	Katie	7	88.5	129	4	298	5.2	0.0172185	84	9427.5	0.00281457	1.242	243.435	NA	144913	0.00304636	0.495442	3.58	0.0118543	NA	20	36.5	NA
62769_6	120	17weeks	Black	Katie	8	Leah	Leah	Katie	8	72.5	137.5	4	336	7.49	0.0220294	82	10350	0.00244118	1.022	227.445	NA	148800	0.00279412	0.519949	4.57	0.0134412	NA	20	38	NA
62771_3	126	17weeks	Albino	Katie	9	Leah	Leah	Katie	9	78	116	9	326	5.67	0.0169254	87	8737.5	0.00310448	1.587	226.928	NA	146574	0.00343284	0.467269	5.48	0.0163582	NA	20	38.5	NA
62771_4	126	17weeks	Brown.Hood	Katie	10	Leah	Leah	Katie	10	83	122	21	351	5.52	0.0148387	100	10897.5	0.00290323	1.495	253.088	NA	199423	0.00298387	0.459846	5.57	0.0149731	NA	21	41	NA
62771_5	126	17weeks	Albino	Katie	11	Leah	Leah	Katie	11	76	65.5	5	340	7.6	0.022029	87	10462.5	0.00295652	2.453	352.815	NA	278295	0.00176812	0.429329	8.04	0.0233043	NA	19	37.5	NA
62771_6	126	17weeks	Brown.Hood	Katie	12	Leah	Leah	Katie	12	78.5	116.5	1	269	2.59	0.00959259	87	9630	0.003	0.854	83.3775	NA	102381	0.00311111	0.53448	3.06	0.0113333	NA	19	36.5	NA
62785_3	208	17weeks	Brown.Hood	Sonia	11	Leah	Leah	Katie	11	96.5	70.5	2	377	6.7	0.0176781	92	13890	0.00306069	1.545	236.58	NA	178471	0.00269129	0.464529	8.84	0.0233245	NA	22	39.5	NA
62785_4	208	17weeks	Albino	Sonia	12	Leah	Leah	Katie	12	70	62	5	294	3.32	0.0111037	87	10612.5	0.00344482	1.521	220.132	NA	192419	0.00351171	0.471332	4.76	0.0159197	NA	20	39	NA
62788_3	133	17weeks	Black.Hood	Katie	3	Leah	Leah	Katie	3	91	126	-2	294	4.4	0.0150685	87	8977.5	0.00315068	1.61	259.515	NA	297962	0.00181507	0.465908	3.95	0.0135274	NA	18	34.5	NA
62788_4	133	17weeks	Black.Hood	Katie	4	Leah	Leah	Katie	4	81.5	99	-1	321	5.04	0.01575	96	10650	0.00321875	1.827	359.288	NA	135907	0.0026875	0.445631	3.95	0.0123438	NA	20	39	NA
62789_3	135	17weeks	Black	Katie	5	Leah	Leah	Katie	5	74.5	115.5	9	320	3.2	0.00972644	82	8865	0.00334347	0.699	65.1075	NA	154526	0.00231003	0.568734	4.19	0.0127356	NA	21	38	NA
62789_4	135	17weeks	Black	Katie	6	Leah	Leah	Katie	6	84.5	164	8	353	4.9	0.0135734	88	10140	0.00288089	1.3	261.225	NA	217196	0.00268698	0.485808	5.72	0.0158449	NA	21	38.5	NA
62790_3	141	17weeks	Brown.Hood	Katie	7	Leah	Leah	Katie	7	63.5	95	13	332	5.86	0.0169855	92	10380	0.00304348	2.138	236.55	NA	154927	0.00237681	0.435959	5.56	0.0161159	NA	18	37.5	NA
62790_4	141	17weeks	Black.Hood	Katie	8	Leah	Leah	Katie	8	81.5	112.5	7	330	6.1	0.0181009	97	11362.5	0.00293769	1.684	255.803	NA	138909	0.00228487	0.451852	4.99	0.0148071	NA	20	37.5	NA
62792_3	151	17weeks	Black	Katie	1	Leah	Leah	Katie	1	100	248	6	403	6.44	0.0157457	95	11880	0.00281174	2.195	NA	NA	384455	0.00215159	0.431191	6.5	0.0158924	NA	20	40	NA
62792_4	151	17weeks	Black.Hood	Katie	2	Leah	Leah	Katie	2	89	189.5	4	375	6.69	0.0176517	87	10522.5	0.00292876	1.545	285.548	NA	209279	0.003219	0.469826	5.94	0.0156728	NA	20.5	39	NA
62797_3	142	17weeks	Black.Hood	Katie	9	Leah	Leah	Katie	9	61.5	84.5	7	276	5.61	0.0198233	87	11100	0.00310954	2.561	381.337	NA	113875	0.00226148	0.425907	4.88	0.0172438	NA	17	35	NA
62797_4	142	17weeks	Brown	Katie	10	Leah	Leah	Katie	10	90.5	162	-2	327	6.48	0.0199385	99	12007.5	0.00338462	1.929	207.743	NA	82667	0.00286154	0.43841	4.87	0.0149846	NA	19	36.5	NA
62798_3	148	17weeks	Brown.Hood	Katie	11	Leah	Leah	Katie	11	66.5	113.5	5	324	4.4	0.0133739	93	12082.5	0.00331307	1.795	344.115	NA	125478	0.00279635	0.449934	6.11	0.0185714	NA	20	38.5	NA
62798_4	148	17weeks	Albino	Katie	12	Leah	Leah	Katie	12	50	57	1	241	2	0.00826446	94	12405	0.00384298	0.705	183.713	NA	116039	0.0042562	0.549053	1.8	0.00743802	NA	19	36	NA
62799_3	153	17weeks	Brown	Jaime	3	Katie	Katie	Katie	3	96.5	74	11	354	7.78	0.0213151	81	8977.5	0.00315068	0.623	258.48	NA	132667	0.00230137	0.587208	5.17	0.0141644	NA	23.5	42	NA
62799_4	153	17weeks	Brown.Hood	Jaime	4	Katie	Katie	Katie	4	78	64	-7	341	5.28	0.0158084	68	12705	0.00269461	1.041	251.355	NA	103813	0.00320359	0.540552	4.4	0.0131737	NA	20	39	NA
62800_3	163	17weeks	Albino	Jaime	5	Katie	Katie	Katie	5	101.5	150	11	324	4.95	0.0147761	95	11287.5	0.00280597	2.211	282.983	NA	132879	0.00271642	0.430605	5.49	0.0163881	NA	20	38.5	NA
62800_4	163	17weeks	Brown.Hood	Jaime	6	Katie	Katie	Katie	6	110	149	6	329	4.06	0.0121194	91	12532.5	0.00307463	1.219	231.3	NA	107660	0.00316418	0.488987	4.46	0.0133134	NA	20	38	NA
62802_3	156	17weeks	Albino	Jaime	9	Katie	Katie	Katie	9	57.5	110.5	-2	343	5.57	0.0163343	74	11460	0.00302053	0.704	405.652	NA	163920	0.00293255	0.582478	5.01	0.0146921	NA	20	39.5	NA
62802_4	156	17weeks	Brown	Jaime	10	Katie	Katie	Katie	10	55	75	0	301	4.36	0.014485	81	12232.5	0.00292359	0.797	285.75	NA	129284	0.00269103	0.552503	3	0.00996678	NA	19	39	NA
62803_4	161	17weeks	Black.Hood	Jaime	8	Katie	Katie	Katie	8	65	151.5	10	266	2.58	0.00934783	86	14235	0.00257246	0.38	224.805	NA	214667	0.00271739	0.660379	3.55	0.0128623	NA	17	32.5	NA
62818_3	175	17weeks	Brown.Hood	Sonia	1	Leah	Leah	Katie	1	131	157	3	392	6.77	0.0171392	89	13425	0.00329114	0.078	399.84	NA	277333	0.00334177	1.18838	10.71	0.0271139	NA	20	37	NA
62818_4	175	17weeks	Black.Hood	Sonia	2	Leah	Leah	Katie	2	101	112.5	8	340	4.84	0.013908	89	13770	0.00382184	1	208.425	NA	281293	0.00284483	0.512981	8.61	0.0247414	NA	19.5	36	NA
62818_5	175	17weeks	Brown.Hood	Sonia	3	Leah	Leah	Katie	3	99.5	99	7	303	4.3	0.013871	91	10642.5	0.00419355	1.74	173.76	NA	131050	0.00325806	0.45463	6.38	0.0205806	NA	20	35.5	NA
62818_6	175	17weeks	Brown.Hood	Sonia	4	Leah	Leah	Katie	4	102	54	3	331	3.32	0.00994012	87	10867.5	0.0042515	0.953	129.023	NA	182548	0.00371257	0.52121	4.9	0.0146707	NA	20	38	NA
62819_3	179	17weeks	Black.Hood	Sonia	5	Leah	Leah	Katie	5	63	105	14	348	6.4	0.0176796	92	9735	0.00279006	1.034	118.582	NA	284043	0.00256906	0.505482	5.24	0.0144751	NA	21	40	NA
62819_4	179	17weeks	Albino	Sonia	6	Leah	Leah	Katie	6	79	131	14	352	5.41	0.0147814	91	9615	0.00311475	0.596	92.745	NA	282727	0.00300546	0.576606	5.03	0.0137432	NA	21.5	39	NA
62819_5	179	17weeks	Black.Hood	Sonia	7	Leah	Leah	Katie	7	83.5	75.5	5	348	4.45	0.0126062	90	10710	0.00291785	1.082	128.062	NA	220956	0.00320113	0.502899	3.98	0.0112748	NA	22	40	NA
62819_6	179	17weeks	Albino	Sonia	8	Leah	Leah	Katie	8	65	58	7	345	5.23	0.014858	91	12240	0.003125	0.601	132.817	NA	239234	0.00267045	0.575402	4.97	0.0141193	NA	20	39	NA
62835_3	172	17weeks	Brown.Hood	Sonia	9	Leah	Leah	Katie	9	76.5	84	13	362	5.74	0.0153067	96	10012.5	0.00304	1.54	208.178	NA	134653	0.00253333	0.460874	5.86	0.0156267	NA	22	41	NA
62835_4	172	17weeks	Brown.Hood	Sonia	10	Leah	Leah	Katie	10	91.5	132.5	3	354	4.8	0.0134454	100	9900	0.00271709	1.389	196.613	NA	282809	0.00263305	0.4667	4.58	0.0128291	NA	20	39	NA
62854_3	165	17weeks	Albino	Sonia	11	Leah	Leah	Katie	11	63.5	53	8	264	3.71	0.0136397	82	8355	0.00308824	1.431	198.893	NA	156736	0.00319853	0.483219	1.25	0.00459559	NA	19	36	NA
62854_4	165	17weeks	Albino	Sonia	12	Leah	Leah	Katie	12	77.5	89	7	306	4.53	0.0144728	84	10057.5	0.00309904	1.091	211.748	NA	173736	0.00338658	0.509657	2.92	0.00932907	NA	20	38	NA
62857_3	173	17weeks	Brown	Sonia	8	Leah	Leah	Katie	8	83	142.5	19	388	8.25	0.0202703	84	11355	0.00262899	1.248	308.663	NA	130906	0.00260442	0.494928	7.29	0.0179115	NA	22	39	NA
62857_4	173	17weeks	Brown	Sonia	9	Leah	Leah	Katie	9	90.5	168.5	24	402	8.65	0.0203052	84	12540	0.002723	2.361	485.452	NA	102464	0.00262911	0.435279	9.15	0.0214789	NA	23	41	NA
62858_3	174	17weeks	Albino	Sonia	7	Leah	Leah	Katie	7	90	126	10	299	4.45	0.0144013	78	8287.5	0.00281553	0.843	86.4525	NA	172850	0.002589	0.550079	5.67	0.0183495	NA	19	35	NA
62858_4	174	17weeks	Albino	Sonia	8	Leah	Leah	Katie	8	NA	NA	5	365	6.21	0.0167838	87	11077.5	0.00405405	1.765	359.288	NA	88129	0.00251351	0.457401	8.52	0.023027	NA	19.5	36.5	NA
62859_4	180	17weeks	Black.Hood	Sonia	3	Leah	Leah	Katie	3	75.5	71	8	290	3.23	0.0108389	71	9112.5	0.00291946	1.072	159.877	NA	117620	0.00265101	0.531504	3.5	0.011745	NA	20	38	NA
62864_3	207	17weeks	Albino	Sonia	6	Leah	Leah	Katie	6	91.5	232.5	6	341	5.03	0.0144957	89	10672.5	0.0029683	1.6	211.808	NA	113849	0.00268012	0.464358	5.96	0.0171758	NA	20	37	NA
62864_4	207	17weeks	Brown.Hood	Sonia	7	Leah	Leah	Katie	7	129.5	174.5	5	294	5.13	0.0171572	87	10822.5	0.00354515	0.874	203.355	NA	107190	0.00280936	0.531623	6.05	0.0202341	NA	19.5	35.5	NA
62867_3	164	17weeks	Black.Hood	Sonia	9	Leah	Leah	Katie	9	NA	NA	4	323	4.57	0.0139755	83	10462.5	0.00321101	1.976	398.43	NA	64755	0.00324159	0.451495	6.82	0.0208563	NA	19	37	NA
62867_4	164	17weeks	Black.Hood	Sonia	10	Leah	Leah	Katie	10	NA	NA	-9	365	6.09	0.0171067	82	10815	0.00308989	2.143	412.02	NA	79374	0.00323034	0.445467	7.06	0.0198315	NA	20	38.5	NA
62868_3	167	17weeks	Albino	Sonia	5	Leah	Leah	Katie	5	63	89	13	323	8.58	0.0255357	85	10357.5	0.00291667	2.156	396.09	NA	78433	0.00357143	0.441878	4.36	0.0129762	NA	19	37	NA
62868_4	167	17weeks	Black	Sonia	6	Leah	Leah	Katie	6	67	138	7	299	7.03	0.0229739	82	12967.5	0.0029085	1.766	486.165	NA	83695	0.00343137	0.462791	4.09	0.013366	NA	18.5	35.5	NA
62872_3	166	17weeks	Albino	Sonia	7	Katie	Katie	Katie	7	88	115	8	378	8.11	0.0210104	90	10447.5	0.0026943	2.163	341.168	NA	289435	0.00238342	0.436815	6.29	0.0162953	NA	23	42	NA
62872_4	166	17weeks	Black.Hood	Sonia	8	Katie	Katie	Katie	8	75.5	61	6	374	6.46	0.017	93	10740	0.00305263	1.7	295.965	NA	149705	0.00339474	0.454766	3.35	0.00881579	NA	21	40	NA
62873_3	175	17weeks	Brown.Hood	Sonia	1	Katie	Katie	Katie	1	108	107	7	340	4.68	0.013487	87	11265	0.00363112	1.268	494.4	NA	133105	0.00302594	0.489563	7.12	0.0205187	NA	22	39.5	NA
62873_4	175	17weeks	Brown.Hood	Sonia	2	Katie	Katie	Katie	2	96	100	5	345	5.78	0.0165143	88	9952.5	0.004	1.419	295.38	NA	108970	0.00282857	0.476993	7.72	0.0220571	NA	21	38	NA
62873_5	175	17weeks	Brown.Hood	Sonia	3	Katie	Katie	Katie	3	139.5	225	7	333	1.33	0.00391176	90	12270	0.00338235	1.517	426.75	NA	190415	0.00311765	0.468334	7.39	0.0217353	NA	22	37.5	NA
62875_3	178	17weeks	Black.Hood	Sonia	3	Katie	Katie	Katie	3	79.5	114	5	332	4.25	0.0126113	92	10702.5	0.0027003	1.278	282.9	NA	124212	0.00335312	0.483017	4.59	0.0136202	NA	22	39.5	NA
62875_4	178	17weeks	Black.Hood	Sonia	4	Katie	Katie	Katie	4	79	86.5	11	322	3.58	0.0107508	91	8595	0.00282282	0.74	132.525	NA	134159	0.00339339	0.546964	3.17	0.00951952	NA	19	37	NA
62881_3	198	17weeks	Albino	Sonia	4	Katie	Katie	Katie	4	79	101	-7	265	3.92	0.0151938	98	11152.5	0.00271318	0.92	160.05	NA	205739	0.00178295	0.511505	2.89	0.0112016	NA	20	37	NA
62882_3	199	17weeks	Brown	Sonia	9	Katie	Katie	Katie	9	73.5	72.5	4	341	4.05	0.0117391	84	10327.5	0.00272464	1.216	167.82	NA	143878	0.00284058	0.497707	4.28	0.0124058	NA	21	37	NA
62882_4	199	17weeks	Albino	Sonia	10	Katie	Katie	Katie	10	80.5	143.5	2	360	8.65	0.023895	86	10035	0.00323204	2.066	288.517	NA	150533	0.00248619	0.444518	5.59	0.015442	NA	21	39	NA
62883_3	203	17weeks	Black.Hood	Sonia	11	Katie	Katie	Katie	11	44	52.5	1	256	3.77	0.0146693	84	10897.5	0.00357977	1.59	245.415	NA	252877	0.00284047	0.470438	3.15	0.0122568	NA	20	37	NA
62883_4	203	17weeks	Black.Hood	Sonia	12	Katie	Katie	Katie	12	74	188	4	325	6.23	0.0189362	81	9975	0.00340426	1.101	289.163	NA	254950	0.00243161	0.512749	6.08	0.0184802	NA	22	39.5	NA
62884_3	205	17weeks	Black	Sonia	5	Katie	Katie	Katie	5	86.5	189.5	-1	277	4.3	0.0155797	98	9757.5	0.00315217	1.742	211.012	NA	186368	0.00275362	0.447974	3.69	0.0133696	NA	19	36.5	NA
62884_4	205	17weeks	Black	Sonia	6	Katie	Katie	Katie	6	74	202	8	320	4.99	0.0152134	107	12195	0.00338415	0.834	159.885	NA	209907	0.0032622	0.512676	4.53	0.013811	NA	20	38	NA
62886_3	176	17weeks	Brown.Hood	Katie	5	Leah	Leah	Katie	5	77	115.5	3	328	3.7	0.0111782	85	9855	0.00256798	1.109	216.278	NA	118101	0.00299094	0.506496	4.81	0.0145317	NA	20	39.5	NA
62886_4	176	17weeks	Black.Hood	Katie	6	Leah	Leah	Katie	6	64	96	6	340	3.76	0.0108671	82	9855	0.00297688	1.367	183.12	NA	55738	0.00309249	0.487904	4.5	0.0130058	NA	21	39.5	NA
62887_3	197	17weeks	Black	Katie	1	Leah	Leah	Katie	1	100.5	200.5	-2	363	8.2	0.0227147	76	10635	0.00229917	1.909	180.727	NA	215714	0.00232687	0.462616	6.43	0.0178116	NA	20	38.5	NA
62887_4	197	17weeks	Black	Katie	2	Leah	Leah	Katie	2	98	79	-105	344	5.08	0.0212552	87	9937.5	0.00451883	1.366	180.87	NA	128411	0.00447699	0.481935	5.24	0.0219247	NA	20	38.5	NA
62888_3	169	17weeks	Black.Hood	Sonia	11	Katie	Katie	Katie	11	65.5	42	1	374	4.53	0.01208	79	9990	0.00306667	1.003	202.373	NA	140560	0.00266667	0.526613	5.85	0.0156	NA	21	43	NA
62888_4	169	17weeks	Brown.Hood	Sonia	12	Katie	Katie	Katie	12	66	144.5	1	356	4.96	0.0138936	84	11715	0.00294118	1.24	NA	NA	123815	0.00302521	0.495614	6.83	0.0191317	NA	21	40	NA
62892_3	185	17weeks	Black.Hood	Katie	1	Leah	Leah	Katie	1	64.5	143	7	303	5.47	0.0176452	90	10717.5	0.00277419	2.01	272.835	NA	170545	0.00283871	0.44298	5	0.016129	NA	20	36	NA
62892_4	185	17weeks	Brown.Hood	Katie	2	Leah	Leah	Katie	2	58.5	89	0	292	2.87	0.00982877	87	12472.5	0.00315068	1.12	217.208	NA	73302	0.00294521	0.502832	3.37	0.0115411	NA	21	38	NA
62893_3	186	17weeks	Albino	Sonia	7	Katie	Katie	Katie	7	57.5	107.5	-3	335	5.33	0.0160542	86	10747.5	0.00298193	3.132	NA	NA	107632	0.00262048	0.411468	5.28	0.0159036	NA	21	39	NA
62893_4	186	17weeks	Albino	Sonia	8	Katie	Katie	Katie	8	72	95.5	3	360	6.2	0.0170799	94	10297.5	0.00338843	2.427	NA	NA	134884	0.00236915	0.424053	4.6	0.0126722	NA	22	42	NA
62895_3	168	17weeks	Black.Hood	Katie	7	Leah	Leah	Katie	7	71	104.5	4	359	6.72	0.0185124	75	11730	0.00289256	1.468	247.718	NA	122678	0.00333333	0.489767	5.53	0.0152342	NA	22	41.5	NA
62895_4	168	17weeks	Black.Hood	Katie	8	Leah	Leah	Katie	8	65	65.5	4	343	7.39	0.0212968	79	9045	0.00273775	1.214	247.387	NA	147685	0.00256484	0.50458	5.08	0.0146398	NA	23.5	42	NA
62896_3	172	17weeks	Brown.Hood	Katie	1	Leah	Leah	Katie	1	73.5	171.5	9	334	7.1	0.0206997	87	9885	0.00303207	2.542	342.27	NA	102641	0.00300292	0.426495	5.72	0.0166764	NA	21	38.5	NA
62896_4	172	17weeks	Brown.Hood	Katie	2	Leah	Leah	Katie	2	73.5	90	3	307	4.23	0.0136452	92	10327.5	0.00325806	1.478	249.555	NA	77774	0.00341935	0.468722	4.18	0.0134839	NA	22	40	NA
62897_4	173	17weeks	Brown	Katie	10	Leah	Leah	Katie	10	86.5	118.5	-5	365	6.43	0.0178611	79	8925	0.00283333	1.444	188.243	NA	170684	0.00219444	0.486099	5.79	0.0160833	NA	22.5	40.5	NA
62900_3	193	17weeks	Black.Hood	Katie	11	Leah	Leah	Katie	11	60.5	45	0	370	3.44	0.0092973	84	10777.5	0.00302703	1.404	110.31	NA	100494	0.00240541	0.482708	5.8	0.0156757	NA	21	40	NA
62900_4	193	17weeks	Brown.Hood	Katie	12	Leah	Leah	Katie	12	72.5	140.5	10	340	7.17	0.0204857	87	10102.5	0.00302857	2.323	414.413	NA	191532	0.0022	0.433733	9.12	0.0260571	NA	21	39.5	NA
62901_3	202	17weeks	Albino	Katie	3	Leah	Leah	Katie	3	53.5	47	6	300	2.58	0.00843137	82	9667.5	0.00346405	1.132	153	NA	139175	0.00316993	0.508218	2.89	0.00944444	NA	20	40	NA
62901_4	202	17weeks	Black	Katie	4	Leah	Leah	Katie	4	50	77	6	284	3.8	0.0131034	70	8767.5	0.00334483	0.724	109.222	NA	92939	0.00337931	0.586566	2.51	0.00865517	NA	21	39.5	NA
62901_5	202	17weeks	Black.Hood	Katie	5	Leah	Leah	Katie	5	47	71	0	280	2.7	0.00964286	71	9615	0.00335714	1.055	134.963	NA	103673	0.0035	0.533473	2.06	0.00735714	NA	20	39	NA
62901_6	202	17weeks	Albino	Katie	6	Leah	Leah	Katie	6	54	93.5	3	292	2.51	0.00850847	74	9870	0.00315254	0.919	190.222	NA	165614	0.0019322	0.545689	2.72	0.00922034	NA	20	39.5	NA
62909_3	177	17weeks	Albino	Katie	3	Leah	Leah	Katie	3	90	164.5	4	384	6.23	0.0160567	92	14685	0.00298969	2.121	417.293	NA	122496	0.00322165	0.436619	7.32	0.018866	NA	20	39.5	NA
62909_4	177	17weeks	Albino	Katie	4	Leah	Leah	Katie	4	99	131	6	329	5.19	0.0154925	79	9457.5	0.00304478	2.265	493.462	NA	189053	0.00283582	0.443913	3.9	0.0116418	NA	21	37.5	NA
62910_3	178	17weeks	Black.Hood	Katie	7	Leah	Leah	Katie	7	83	152.5	12	331	4.16	0.0121283	87	10897.5	0.0028863	2.526	357.533	NA	119434	0.0028863	0.426994	4.44	0.0129446	NA	21.5	38	NA
62910_4	178	17weeks	Black.Hood	Katie	8	Leah	Leah	Katie	8	87	77	3	270	2.02	0.00739927	87	9817.5	0.00278388	1.533	208.748	NA	199302	0.00315018	0.470575	6.8	0.0249084	NA	19	36	NA
62911_3	179	17weeks	Albino	Katie	3	Leah	Leah	Katie	3	77.5	106	7	346	6.59	0.0186686	85	8572.5	0.00368272	1.715	190.868	NA	120500	0.00385269	0.462175	5.09	0.0144193	NA	21	41	NA
62911_4	179	17weeks	Black.Hood	Katie	4	Leah	Leah	Katie	4	98	151.5	8	345	4.33	0.0122663	91	11925	0.00308782	1.935	255.885	NA	221459	0.00240793	0.445291	4.29	0.012153	NA	21.5	40	NA
62912_3	182	17weeks	Brown	Katie	5	Leah	Leah	NA	NA	NA	NA	NA	297	NA	NA	78	9637.5	NA	1.332	236.73	NA	NA	NA	0.495884	NA	NA	NA	NA	NA	NA
62912_4	182	17weeks	Brown	Katie	6	Leah	Leah	Katie	6	93.5	120	7	311	4.56	0.0143396	87	10447.5	0.00251572	1.284	204.765	NA	237418	0.00248428	0.488261	4.5	0.0141509	NA	21	38.5	NA
62913_3	187	17weeks	Brown	Katie	9	Leah	Leah	Katie	9	78.5	84.5	-1	282	4.29	0.0152669	85	10485	0.00359431	1.719	240.735	NA	185800	0.00284698	0.461959	4.57	0.0162633	NA	21	38.5	NA
62913_4	187	17weeks	Brown	Katie	10	Leah	Leah	Katie	10	76	91.5	2	263	3.33	0.012566	86	9697.5	0.00358491	1.365	200.903	NA	121026	0.0029434	0.483178	2.52	0.00950943	NA	20	36	NA
62913_5	187	17weeks	Brown	Katie	11	Leah	Leah	Katie	11	116.5	77.5	-8	300	3.5	0.0119863	83	12967.5	0.00438356	1.895	221.257	NA	159549	0.00243151	0.455231	4.36	0.0149315	NA	20	38	NA
62913_6	187	17weeks	Brown	Katie	12	Leah	Leah	Katie	12	55.5	50.5	5	320	4.9	0.0150769	78	12442.5	0.00443077	1.609	144.03	NA	287525	0.00181538	0.476497	5.58	0.0171692	NA	20.5	39	NA
62917_3	195	17weeks	Black.Hood	Katie	5	Leah	Leah	Katie	5	87	43	6	422	5.3	0.0123832	92	12315	0.00280374	1.066	213.053	NA	163170	0.00315421	0.502123	4.82	0.0112617	NA	23	43.5	NA
62917_4	195	17weeks	Albino	Katie	6	Leah	Leah	Katie	6	NA	NA	-1	381	5.48	0.0144211	83	11752.5	0.00302632	0.808	223.14	NA	181319	0.00247368	0.547498	4.41	0.0116053	NA	21	40	NA
62919_3	206	17weeks	Black.Hood	Katie	1	Leah	Leah	Katie	1	70	201.5	14	380	5.94	0.0150761	85	12510	0.00274112	2.035	575.048	NA	207840	0.00253807	0.446831	6.27	0.0159137	NA	20	39.5	NA
62919_4	206	17weeks	Black.Hood	Katie	2	Leah	Leah	Katie	2	76.5	178.5	3	393	6.84	0.0172727	82	13470	0.0030303	1.172	284.085	NA	267913	0.00232323	0.504352	7.21	0.0182071	NA	22	41	NA
62920_4	165	17weeks	Black.Hood	Sonia	2	Katie	Katie	Katie	2	86.5	102	7	288	3.22	0.0109153	86	9967.5	0.00271186	1.186	180.442	NA	446474	0.00257627	0.497863	3.22	0.0109153	NA	17.5	35.5	NA
62920_5	165	17weeks	Albino	Sonia	3	Katie	Katie	Katie	3	72.5	118	6	310	4.5	0.0142405	78	8880	0.00303797	1.768	160.058	NA	277204	0.00294304	0.467382	4.3	0.0136076	NA	19	37.5	NA
62920_6	165	17weeks	Brown.Hood	Sonia	4	Katie	Katie	Katie	4	82	70.5	11	306	3.85	0.0121451	73	9712.5	0.00280757	1.165	203.985	NA	231616	0.00230284	0.518229	3.16	0.00996845	NA	18.5	37	NA
62921_3	166	17weeks	Black.Hood	Katie	7	Leah	Leah	Katie	7	75.5	102.5	1	322	7.97	0.0246749	81	9495	0.00281734	1.002	159.585	NA	88500	0.00346749	0.523738	4.72	0.014613	NA	21	38	NA
62921_4	166	17weeks	Albino	Katie	8	Leah	Leah	Katie	8	83.5	95	-5	327	6.84	0.0212422	76	10215	0.00285714	1.777	343.365	NA	136000	0.00236025	0.469373	3.12	0.00968944	NA	21	39	NA
62922_3	169	17weeks	Black.Hood	Sonia	5	Katie	Katie	Katie	5	66.5	85.5	7	331	6.26	0.0185207	76	9060	0.00310651	3.112	436.92	NA	206926	0.00319527	0.421256	6.41	0.0189645	NA	20	38	NA
62922_4	169	17weeks	Brown.Hood	Sonia	6	Katie	Katie	Katie	6	63.5	87	3	340	4.36	0.0127114	71	9277.5	0.00291545	1.217	255.705	NA	81451	0.00329446	0.516383	4.97	0.0144898	NA	20	39.5	NA
62923_3	170	17weeks	Albino	Sonia	7	Katie	Katie	Katie	7	24	231.5	0	326	3.77	0.0115644	77	9030	0.00285276	1.551	313.905	NA	171569	0.00312883	0.48144	4.14	0.0126994	NA	20	39	NA
62923_4	170	17weeks	Brown	Sonia	8	Katie	Katie	Katie	8	70.5	112.5	6	345	3.12	0.00888889	85	8632.5	0.002849	1.665	242.333	NA	114982	0.00324786	0.464936	4.41	0.0125641	NA	19	38	NA
62928_3	200	17weeks	Black	Katie	9	Leah	Leah	Katie	9	51	49	8	332	4.31	0.0126765	76	9007.5	0.00323529	0.901	211.657	NA	143596	0.00320588	0.544799	4.25	0.0125	NA	21	40	NA
62928_4	200	17weeks	Brown	Katie	10	Leah	Leah	Katie	10	77.5	70	2	368	7.75	0.0209459	74	10942.5	0.00302703	1.482	309.082	NA	175570	0.00327027	0.490177	7.73	0.0208919	NA	20	39	NA
62929_3	201	17weeks	Black	Katie	11	Leah	Leah	Katie	11	58.5	60.5	7	283	4.91	0.016931	69	8355	0.0027931	0.864	195.308	NA	177892	0.0032069	0.563265	3.82	0.0131724	NA	20	38.5	NA
62929_4	201	17weeks	Albino	Katie	12	Leah	Leah	Katie	12	59.5	58.5	8	295	3.35	0.0110561	71	8317.5	0.00313531	1.489	405.27	NA	283704	0.00267327	0.494034	4.75	0.0156766	NA	19.5	37	NA
62934_3	185	17weeks	Black.Hood	Sonia	9	Katie	Katie	Katie	9	65.5	100.5	12	261	4.07	0.0149084	83	9645	0.00296703	2.206	252.382	NA	145859	0.00260073	0.441953	3.6	0.0131868	NA	19	35	NA
62934_4	185	17weeks	Brown.Hood	Sonia	10	Katie	Katie	Katie	10	71.5	98.5	9	301	5.62	0.018129	88	12337.5	0.00296774	1.977	305.19	NA	166947	0.00306452	0.446331	4.54	0.0146452	NA	19	35.5	NA
62935_3	207	17weeks	Albino	Sonia	11	Katie	Katie	Katie	11	97	122.5	1	293	3.3	0.0112245	70	9532.5	0.00387755	1.282	246.232	NA	168204	0.00333333	0.512036	5	0.0170068	NA	20	37.5	NA
62936_3	164	17weeks	Albino	Katie	7	Leah	Leah	Katie	7	103	141.5	-4	397	9.09	0.0231298	75	10957.5	0.00267176	1.88	172.088	NA	151496	0.00343511	0.465285	10.51	0.026743	NA	21	40.5	NA
62936_4	164	17weeks	Black.Hood	Katie	8	Leah	Leah	Katie	8	117	173	3	379	6.44	0.0168586	82	9435	0.00298429	1.573	221.07	NA	157461	0.00301047	0.473812	8	0.0209424	NA	21	39	NA
62938_3	172	17weeks	Brown.Hood	Katie	9	Leah	Leah	Katie	9	60	73	16	322	4.63	0.0136982	87	9637.5	0.00331361	1.378	209.13	NA	120214	0.00331361	0.481054	3.8	0.0112426	NA	20	40.5	NA
62938_4	172	17weeks	Brown.Hood	Katie	10	Leah	Leah	Katie	10	72.5	163.5	11	341	6.04	0.0171591	84	9112.5	0.00284091	1.276	172.95	NA	149702	0.00267045	0.492579	5.19	0.0147443	NA	20.5	40	NA
62943_3	193	17weeks	Brown.Hood	Katie	11	Leah	Leah	Katie	11	67.5	92	-3	363	5.37	0.0149167	80	10365	0.00283333	2.293	229.065	NA	124735	0.00272222	0.441795	5.87	0.0163056	NA	22.5	41	NA
62943_4	193	17weeks	Black.Hood	Katie	12	Leah	Leah	Katie	12	64.5	74	0	360	5.19	0.0144167	81	9600	0.00283333	2.382	378.743	NA	168962	0.00288889	0.437555	5.68	0.0157778	NA	21	40	NA
62944_3	196	17weeks	Black	Katie	5	Leah	Leah	Katie	5	88	172.5	3	363	7.35	0.020082	95	14310	0.00259563	1.526	355.875	NA	333087	0.00251366	0.462689	8.28	0.022623	NA	20.5	39	NA
62944_4	196	17weeks	Black.Hood	Katie	6	Leah	Leah	Katie	6	66	72	-3	334	5.74	0.0173414	88	10800	0.00256798	0.85	185.572	NA	242682	0.00256798	0.533646	5.03	0.0151964	NA	22	40	NA
62961_3	183	17weeks	Brown	Katie	7	Leah	Leah	Katie	7	71.5	47.5	-1	336	4.15	0.0123881	89	11610	0.00322388	1.147	179.595	NA	120174	0.00343284	0.497772	4.08	0.0121791	NA	19	40	NA
62961_4	183	17weeks	Black.Hood	Katie	8	Leah	Leah	Katie	8	76.5	35.5	4	327	3.24	0.00978852	82	12975	0.00265861	0.492	114.082	NA	143678	0.0026284	0.622751	2.55	0.00770393	NA	21	41	NA
62962_3	185	17weeks	Brown.Hood	Katie	1	Leah	Leah	Katie	1	70.5	102	3	307	5.12	0.0165161	97	12577.5	0.00296774	1.776	191.07	NA	150167	0.00309677	0.447184	4.36	0.0140645	NA	21	38.5	NA
62962_4	185	17weeks	Brown.Hood	Katie	2	Leah	Leah	Katie	2	65.5	120	-5	325	6.61	0.0206563	102	12457.5	0.002875	1.942	252.87	NA	151178	0.00228125	0.435379	6.75	0.0210938	NA	20.5	37.5	NA
62963_4	186	17weeks	Albino	Katie	2	Leah	Leah	Katie	2	106	151	0	366	5.86	0.0160109	119	15562.5	0.00352459	3.508	456.51	NA	193496	0.00336066	0.381591	2.87	0.00784153	NA	22	40	NA
62966_3	205	17weeks	Black	Katie	11	Leah	Leah	Katie	11	115.5	184.5	4	343	6.8	0.0195965	93	10822.5	0.00314121	1.431	223.748	NA	142144	0.00279539	0.470783	8.96	0.0258213	NA	22.5	40.5	NA
62966_4	205	17weeks	Black.Hood	Katie	12	Leah	Leah	Katie	12	120.5	232.5	3	392	6.46	0.0163544	100	12097.5	0.00303797	1.341	214.357	NA	309735	0.00210127	0.470051	8.85	0.0224051	NA	22	41	NA
62968_3	168	17weeks	Black.Hood	Katie	9	Leah	Leah	Katie	9	88.5	183.5	5	343	6.91	0.0198563	88	10297.5	0.00258621	1.509	277.658	NA	150063	0.00272989	0.470993	8.16	0.0234483	NA	22	39.5	NA
62968_4	168	17weeks	Black.Hood	Katie	10	Leah	Leah	Katie	10	73.5	186.5	-4	390	8.66	0.0224352	87	13747.5	0.00297927	1.132	222.015	NA	214989	0.00246114	0.501664	7.68	0.0198964	NA	22	42	NA
62970_5	174	17weeks	Albino	Katie	7	Leah	Leah	Katie	7	63	76	5	298	3.12	0.010297	87	10335	0.00330033	1.193	185.76	NA	187350	0.00264026	0.495992	3.92	0.0129373	NA	20	36.5	NA
62975_3	197	17weeks	Black	Katie	8	Leah	Leah	Katie	8	76.5	70	-3	313	5.02	0.0161935	91	11550	0.0026129	2.077	400.095	NA	254381	0.00270968	0.439275	4.6	0.0148387	NA	23	39	NA
62975_4	197	17weeks	Black	Katie	9	Leah	Leah	Katie	9	83	97	-1	333	5.63	0.0169578	84	10027.5	0.00243976	1.483	307.238	NA	194653	0.00295181	0.477231	5.16	0.0155422	NA	20	38	NA
62975_5	197	17weeks	Black	Katie	10	Leah	Leah	Katie	10	NA	NA	1	319	7.67	0.0239688	86	12007.5	0.002875	1.126	180.292	NA	130766	0.0029375	0.503515	5.47	0.0170938	NA	20	38	NA
62977_1	207	17weeks	Brown.Hood	Katie	3	Leah	Leah	Katie	3	136.5	130.5	7	354	4.06	0.0112465	100	12165	0.00393352	1.135	180.968	NA	224681	0.00260388	0.486619	7.25	0.0200831	NA	22	41	NA
62978_3	164	17weeks	Black.Hood	Katie	1	Leah	Leah	Katie	1	91.5	137.5	-1	344	6.58	0.0191837	77	12322.5	0.00291545	1.064	228.308	NA	186356	0.00262391	0.522621	6.65	0.0193878	NA	21	39.5	NA
62978_4	164	17weeks	Black.Hood	Katie	2	Leah	Leah	Katie	2	141	220.5	2	393	19.19	0.0485823	82	9472.5	0.0035443	1.456	207.18	NA	140602	0.00286076	0.481469	9.26	0.023443	NA	22	41.5	NA
62978_5	164	17weeks	Black.Hood	Katie	3	Leah	Leah	Katie	3	104.5	195.5	5	360	5.48	0.0150137	74	11985	0.00290411	1.588	293.4	NA	108517	0.00317808	0.483073	8.06	0.0220822	NA	22	40.5	NA
62978_6	164	17weeks	Black.Hood	Katie	4	Leah	Leah	Katie	4	112.5	230.5	2	372	6.63	0.0177273	79	11707.5	0.0028877	2.446	421.733	NA	103789	0.00304813	0.437429	8.78	0.0234759	NA	21	40	NA
62980_3	173	17weeks	Black	Jaime	1	Katie	Katie	Katie	1	107	122	5	345	4.83	0.0138	94	11632.5	0.00277143	1.423	217.298	NA	98433	0.00342857	0.470293	5.04	0.0144	NA	21	39	NA
62980_4	173	17weeks	Brown	Jaime	2	Katie	Katie	Katie	2	88	118.5	3	429	7.1	0.0164352	75	10447.5	0.00261574	0.946	296.22	NA	193116	0.00199074	0.540262	7.84	0.0181481	NA	22.5	41.5	NA
62980_5	173	17weeks	Black	Jaime	3	Katie	Katie	Katie	3	103.5	123	6	363	5.78	0.015664	85	10320	0.00271003	1.477	279.75	NA	124687	0.00268293	0.476463	5.85	0.0158537	NA	23	41	NA
62980_6	173	17weeks	Brown	Jaime	4	Katie	Katie	Katie	4	93	85	4	363	5.52	0.0150409	85	9645	0.00288828	1.469	268.965	NA	101236	0.0033515	0.476999	6.37	0.0173569	NA	20	37.5	NA
62980_7	173	17weeks	Brown	Jaime	5	Katie	Katie	Katie	5	95.5	118	5	374	5.3	0.0139842	87	10492.5	0.00298153	1.201	217.59	NA	114378	0.00292876	0.495279	5.3	0.0139842	NA	20.5	41	NA
62982_3	178	17weeks	Black.Hood	Jaime	6	Katie	Katie	Katie	6	87	86.5	7	286	2.53	0.00863481	86	10117.5	0.0031058	0.345	NA	NA	106130	0.00313993	0.679201	1.89	0.00645051	NA	18.5	36.5	NA
62982_6	178	17weeks	Black.Hood	Jaime	9	Katie	Katie	Katie	9	97.5	68	10	334	2.47	0.00718023	79	11625	0.00281977	1.078	292.89	NA	168043	0.00273256	0.518069	2.51	0.00729651	NA	20	39	NA
62982_7	178	17weeks	Black.Hood	Jaime	10	Katie	Katie	Katie	10	72.5	60	9	323	3.54	0.0106627	84	10642.5	0.00313253	0.589	NA	NA	131053	0.00343373	0.590181	3.46	0.0104217	NA	18	37	NA
62986_3	190	17weeks	Black	Jaime	12	Katie	Katie	Katie	12	92.5	110	1	309	3.81	0.0122903	93	12465	0.00390323	1.767	417.525	NA	147532	0.00248387	0.451321	5.51	0.0177742	NA	20	37.5	NA
62987_3	194	17weeks	Brown	Katie	5	Leah	Leah	Katie	5	54.5	75	-4	290	3.23	0.0112937	82	10597.5	0.00297203	0.978	135.375	NA	80340	0.00328671	0.525168	4.28	0.014965	NA	20	37	NA
62987_4	194	17weeks	Black.Hood	Katie	6	Leah	Leah	Katie	6	64	105.5	-1	298	3.63	0.0122222	77	9015	0.00265993	0.779	120.66	NA	112857	0.00282828	0.562421	5.24	0.0176431	NA	20	38	NA
62988_5	198	17weeks	Brown.Hood	Katie	9	Leah	Leah	Katie	9	76.5	51.5	6	341	3.74	0.0107781	75	11025	0.00337176	1.859	227.025	NA	138902	0.00293948	0.466344	3.63	0.0104611	NA	23	40	NA
62988_6	198	17weeks	Albino	Katie	10	Leah	Leah	Katie	10	95	128.5	2	372	7.84	0.0209626	86	10807.5	0.00371658	1.507	214.178	NA	164421	0.00254011	0.473348	4.37	0.0116845	NA	23	40	NA
62991_3	206	17weeks	Black.Hood	Jaime	11	Katie	Katie	Katie	11	95	180.5	10	378	6.88	0.017732	85	12757.5	0.00309278	0.612	233.438	NA	134761	0.00291237	0.582693	7.05	0.0181701	NA	20	38	NA
62995_3	183	17weeks	Brown.Hood	Katie	4	Leah	Leah	Katie	4	87	56.5	7	326	3.11	0.00933934	76	9532.5	0.00303303	1.133	148.8	NA	110692	0.00312312	0.516784	3.22	0.00966967	NA	21.5	39	NA
62995_4	183	17weeks	Brown	Katie	5	Leah	Leah	Katie	5	83.5	73	3	350	5.58	0.0158074	85	11182.5	0.00322946	1.475	298.238	NA	150882	0.00263456	0.476597	4.48	0.0126912	NA	21	40	NA
62996_3	186	17weeks	Albino	Katie	11	Leah	Leah	Katie	11	70.5	157	0	272	3.03	0.0111397	90	11317.5	0.00382353	1.703	305.265	NA	236778	0.00264706	0.45757	2.86	0.0105147	NA	20	38.5	NA
62996_4	186	17weeks	Albino	Katie	12	Leah	Leah	Katie	12	79.5	118.5	-1	318	5.34	0.0168454	89	11917.5	0.00362776	1.988	310.717	NA	148680	0.00315457	0.444878	4.78	0.0150789	NA	21	39	NA
62999_4	203	17weeks	Black.Hood	Katie	3	Leah	Leah	NA	NA	NA	NA	NA	254	NA	NA	71	8752.5	NA	1.345	219.232	NA	NA	NA	0.505055	NA	NA	NA	NA	NA	NA
63000_3	168	17weeks	Brown.Hood	Katie	6	Leah	Leah	Katie	6	65	149.5	-1	371	8.69	0.0234865	73	9225	0.00259459	0.664	442.65	NA	139216	0.00262162	0.593299	10.1	0.0272973	NA	20	39.5	NA
63000_4	168	17weeks	Brown	Katie	7	Leah	Leah	Katie	7	71.5	132	6	350	6.39	0.0179494	82	8917.5	0.00280899	1.69	372.285	NA	55633	0.00275281	0.466919	6.75	0.0189607	NA	22	42	NA
63002_3	184	17weeks	Albino	Katie	1	Leah	Leah	Katie	1	83.5	79.5	0	380	6.51	0.0171316	75	9067.5	0.003	4.858	317.692	NA	146098	0.00215789	0.390393	6.69	0.0176053	NA	23	41	NA
63002_4	184	17weeks	Black	Katie	2	Leah	Leah	Katie	2	78.5	59	-2	300	5	0.0167785	74	9255	0.00312081	2.173	281.603	NA	109535	0.00288591	0.453249	4.72	0.0158389	NA	22	39	NA
63003_3	185	17weeks	Black.Hood	Katie	8	Leah	Leah	Katie	8	65.5	102.5	6	285	4.31	0.014811	80	9660	0.00319588	1.926	242.07	NA	91053	0.00261168	0.457091	5.16	0.017732	NA	20	36.5	NA
63006_3	197	17weeks	Black	Katie	3	Leah	Leah	Katie	3	75	87	-1	301	3.55	0.0118333	70	9337.5	0.00266667	2.187	355.027	NA	123034	0.0029	0.457677	4.24	0.0141333	NA	20	38	NA
63006_4	197	17weeks	Black	Katie	4	Leah	Leah	Katie	4	91.5	87	3	276	3.96	0.0141935	76	10372.5	0.00275986	2.311	308.79	NA	143571	0.00301075	0.445511	4.33	0.0155197	NA	20	37	NA
63008_3	207	17weeks	Albino	Katie	9	Leah	Leah	Katie	9	87.5	162.5	8	353	2.5	0.00692521	85	9787.5	0.00279778	1.131	204.495	NA	123233	0.0033241	0.504317	5.61	0.0155402	NA	21	39.5	NA
63008_4	207	17weeks	Brown.Hood	Katie	10	Leah	Leah	Katie	11	84	108.5	10	307	4.84	0.0152681	85	9285	0.00318612	1.726	274.11	NA	123692	0.00246057	0.461583	7.85	0.0247634	NA	20	38	NA
63008_5	207	17weeks	Albino	Katie	11	Leah	Leah	Katie	12	97	159.5	7	326	4.68	0.0140541	72	9112.5	0.00282282	0.937	258.457	NA	127625	0.00288288	0.546725	6.18	0.0185586	NA	20	38	NA
63012_3	172	17weeks	Brown.Hood	Katie	5	Leah	Leah	Katie	5	54	87	6	337	5.07	0.0147813	78	9337.5	0.00303207	2.63	332.062	NA	121534	0.00212828	0.432517	5.6	0.0163265	NA	21	40.5	NA
63012_4	172	17weeks	Brown.Hood	Katie	6	Leah	Leah	Katie	6	68	71.5	10	310	3.13	0.00978125	77	9772.5	0.00278125	0.52	131.385	NA	108515	0.00315625	0.624027	3.48	0.010875	NA	20	40.5	NA
63014_3	177	17weeks	Albino	Katie	1	Leah	Leah	Katie	1	74.5	80	0	309	2.78	0.00899676	71	8580	0.00262136	1.072	258.127	NA	156658	0.00236246	0.531504	2.71	0.00877023	NA	20	37.5	NA
63014_4	177	17weeks	Albino	Katie	2	Leah	Leah	Katie	2	87.5	85	3	305	3.11	0.0100974	78	8475	0.00366883	0.655	123.96	NA	137070	0.00279221	0.585365	2.73	0.00886364	NA	20	36	NA
63016_3	180	17weeks	Brown.Hood	Katie	9	Leah	Leah	Katie	9	67.5	115.5	6	368	3.85	0.0102941	73	8115	0.00264706	2.814	251.452	NA	178541	0.00197861	0.432405	5.67	0.0151604	NA	21	40	NA
63016_4	180	17weeks	Black	Katie	10	Leah	Leah	Katie	10	71	125.5	14	343	3.65	0.0102241	68	7867.5	0.00280112	1.008	150.975	NA	185870	0.00215686	0.544671	4.76	0.0133333	NA	22	41	NA
63017_3	181	17weeks	Brown	Katie	7	Leah	Leah	Katie	7	70.5	120	11	345	6.14	0.0172472	68	9172.5	0.00280899	2.098	264.757	NA	102936	0.00264045	0.464185	5.37	0.0150843	NA	23	42	NA
63017_4	181	17weeks	Albino	Katie	8	Leah	Leah	Katie	8	72.5	123.5	-1	350	5.55	0.0159026	70	8332.5	0.00289398	2.131	375.885	NA	118339	0.00338109	0.460049	5.11	0.0146418	NA	20	41	NA
63032_3	174	17weeks	Albino	Katie	1	Leah	Leah	Katie	1	63	55	-3	282	2.91	0.0104301	73	9225	0.00437276	1.285	188.22	NA	83143	0.00351254	0.507041	2.62	0.00939068	NA	17	36	NA
63032_4	174	17weeks	Albino	Katie	2	Leah	Leah	Katie	2	75.5	68.5	-4	316	3.26	0.0104487	72	8602.5	0.00342949	0.717	188.197	NA	114541	0.00272436	0.583822	4.2	0.0134615	NA	20	39	NA
63032_5	174	17weeks	Albino	Katie	3	Leah	Leah	Katie	3	72.5	105	5	354	4.85	0.0135097	83	9330	0.00342618	1.555	292.08	NA	117293	0.00275766	0.473752	5.65	0.0157382	NA	20	38	NA
63032_6	174	17weeks	Albino	Katie	4	Leah	Leah	Katie	4	73	67	-1	294	4.14	0.0141297	71	10170	0.00303754	0.914	130.732	NA	92404	0.00303754	0.551814	4	0.0136519	NA	18	35	NA
63056_3	183	17weeks	Brown	Katie	5	Leah	Leah	Katie	5	77.5	65.5	3	330	4.52	0.0135736	79	9727.5	0.00303303	1.11	166.77	NA	53000	0.00288288	0.514681	4	0.012012	NA	22	41.5	NA
63065_3	214	24weeks	Brown.Hood	Katie	1	Leah	Leah	Katie	1	NA	NA	19	231	3.48	0.01392	62	7477.5	0.00304	1.505	252.45	0.00324	85234	0.00376	0.507633	3.3	0.0132	0.00348	18	34.5	0.00672
63065_4	214	24weeks	Black.Hood	Katie	2	Leah	Leah	Katie	2	NA	NA	42	320	5.79	0.0159945	73	8797.5	0.00292818	1.295	214.058	0.00312155	111767	0.0028453	0.506177	6.47	0.0178729	0.00309392	20	39	0.00621547
63066_3	232	24weeks	Black.Hood	Jaime	11	Katie	Katie	Katie	11	NA	NA	40	300	9.93	0.0292059	80	10290	0.00329412	2.432	405.188	0.00302941	144615	0.00267647	0.436862	6.2	0.0182353	0.00308824	20	37	0.00611765
63066_4	232	24weeks	Brown	Jaime	12	Katie	Katie	Nick	12	NA	NA	51	360	9.03	0.0219708	83	11137.5	0.00333333	1.895	316.192	0.00328467	249928	0.00201946	0.455231	7.09	0.0172506	0.00311436	18.5	35	0.00639903
63073_3	193	17weeks	Brown.Hood	Katie	12	Leah	Leah	Katie	12	55.5	55	2	335	2.51	0.00744807	79	10980	0.00311573	0.93	195.157	NA	72588	0.00302671	0.535874	4.73	0.0140356	NA	21	39	NA
63086_3	218	24weeks	Brown.Hood	Katie	11	Leah	Leah	Katie	11	NA	NA	39	334	5.99	0.016059	74	10102.5	0.00337802	2.797	244.56	0.00351206	113809	0.00308311	0.431793	9.96	0.0267024	0.00340483	21	38.5	0.00691689
63086_4	218	24weeks	Brown.Hood	Katie	12	Leah	Leah	Katie	12	NA	NA	26	326	4.84	0.01375	78	12240	0.00392045	1.475	304.5	0.00323864	139828	0.00264205	0.485228	7.87	0.022358	0.00349432	21	39	0.00673295
63087_3	229	24weeks	Black	Katie	5	Leah	Leah	Nick	5	NA	NA	20	273	3.45	0.0117747	76	10852.5	0.00361775	1.009	186.683	0.00358362	141474	0.00194539	0.530587	3.61	0.0123208	0.00375427	16	34	0.00733788
63087_4	229	24weeks	Black	Katie	6	Leah	Leah	Nick	6	NA	NA	21	314	5.79	0.0172836	79	10462.5	0.00289552	0.8	189.705	0.00346269	249488	0.00128358	0.555334	3.99	0.0119104	0.00358209	18	36	0.00704478
63090_3	245	24weeks	Black	Katie	3	Leah	Leah	Katie	3	NA	NA	24	293	3.67	0.0115773	76	9952.5	0.00362776	0.81	182.925	0.00277603	135289	0.00283912	0.558878	3.42	0.0107886	0.00290221	21	37.5	0.00567823
63090_4	245	24weeks	Albino	Katie	4	Leah	Leah	Katie	4	NA	NA	53	383	9.73	0.0223165	80	10965	0.00263761	2.048	417.69	0.00284404	179167	0.00275229	0.451586	8.81	0.0202064	0.00300459	22	40	0.00584862
63092_3	217	24weeks	Brown	Katie	9	Leah	Leah	Katie	9	NA	NA	38	332	5.44	0.0147027	80	10012.5	0.00321622	1.349	310.642	0.00354054	124397	0.00327027	0.491859	5.45	0.0147297	0.0037027	21	41	0.00724324
63092_4	217	24weeks	Brown.Hood	Katie	10	Leah	Leah	Katie	10	NA	NA	34	279	3.61	0.0115335	79	10395	0.00300319	1.193	219.548	0.00325879	79774	0.00338658	0.506517	4.07	0.0130032	0.00338658	19	36	0.00664537
63094_3	228	24weeks	Brown	Katie	3	Leah	Leah	Katie	3	NA	NA	26	287	5.75	0.0183706	78	9502.5	0.00284345	1.598	294.502	0.00319489	NA	0.00335463	0.477174	4.76	0.0152077	0.00332268	18.5	36	0.00651757
63094_4	228	24weeks	Black	Katie	4	Leah	Leah	Katie	4	NA	NA	17	326	5.74	0.0167347	83	9442.5	0.00311953	1.406	221.94	0.00326531	NA	0.00291545	0.483778	3.12	0.00909621	0.00326531	19.5	38	0.00653061
63095_3	248	24weeks	Brown	Katie	1	Leah	Leah	Katie	1	NA	NA	35	268	3.63	0.0119802	63	7447.5	0.00306931	0.729	86.8425	0.00330033	110786	0.00184818	0.60166	3.68	0.0121452	0.00349835	19	39	0.00679868
63095_4	248	24weeks	Brown	Katie	2	Leah	Leah	Katie	2	NA	NA	37	296	3.95	0.0118619	74	10125	0.0027027	1.01	119.153	0.00324324	88043	0.00282282	0.533745	7.24	0.0217417	0.00336336	20	41	0.00660661
63118_3	233	24weeks	Brown	Katie	6	Leah	Leah	Nick	6	NA	NA	53	276	8.05	0.0244681	89	13282.5	0.00379939	2.277	211.778	0.0031307	142585	0.00197568	0.43351	19.11	0.0580851	0.00303951	18	35	0.00617021
63118_4	233	24weeks	Black	Katie	7	Leah	Leah	Nick	7	NA	NA	30	307	6.01	0.0178338	90	14152.5	0.0031454	3.599	413.123	0.00320475	185730	0.00219585	0.398339	5.53	0.0164095	0.00332344	18	36	0.00652819
63118_5	233	24weeks	Brown	Katie	8	Leah	Leah	Nick	8	NA	NA	30	296	7.38	0.022638	89	11377.5	0.00355828	3.021	233.498	0.00337423	125918	0.00223926	0.4116	5.31	0.0162883	0.00343558	18	36.5	0.00680982
63119_3	249	24weeks	Black.Hood	Jaime	1	Katie	Katie	Katie	1	NA	NA	12	273	3.57	0.0125263	69	7785	0.00291228	0.825	132.743	0.00357895	149205	0.00291228	0.569702	3.03	0.0106316	0.00368421	19	38	0.00726316
63119_4	249	24weeks	Brown	Jaime	2	Katie	Katie	Katie	2	NA	NA	24	282	3.37	0.0110131	74	8760	0.00271242	0.709	147	0.00336601	107024	0.00267974	0.581437	2.6	0.00849673	0.00349673	19	38.5	0.00686275
63119_5	249	24weeks	Brown.Hood	Jaime	3	Katie	Katie	Katie	3	NA	NA	29	310	4.31	0.0127139	62	8527.5	0.00283186	0.687	117.735	0.00345133	125143	0.00227139	0.613742	2.93	0.00864307	0.00336283	20.5	40	0.00681416
63119_6	249	24weeks	Albino	Jaime	4	Katie	Katie	Katie	4	NA	NA	24	272	3.32	0.0112162	61	8182.5	0.00317568	0.698	138.562	0.00429054	125934	0.00307432	0.613804	3.14	0.0106081	0.0039527	19	38.5	0.00824324
63157_3	209	24weeks	Albino	Katie	1	Leah	Leah	Katie	1	NA	NA	30	275	4.18	0.0137049	79	10687.5	0.00311475	1.603	214.815	0.00298361	NA	0.00314754	0.475611	3.95	0.0129508	0.00321311	19	36	0.00619672
63157_4	209	24weeks	Brown.Hood	Katie	2	Leah	Leah	Katie	2	NA	NA	30	293	4.19	0.0129721	78	10290	0.00331269	1.639	268.995	0.00349845	NA	0.00331269	0.474682	3.62	0.0112074	0.00340557	21	39	0.00690402
63159_3	225	24weeks	Black	Katie	9	Leah	Leah	Nick	9	NA	NA	46	309	4.45	0.0125352	77	8437.5	0.00484507	1.772	310.642	0.0031831	NA	0.00194366	0.468394	4.86	0.0136901	0.00338028	18	36.5	0.00656338
63159_4	225	24weeks	Brown	Katie	13	Leah	Leah	Nick	10	NA	NA	22	348	3.93	0.0106216	74	9540	0.00327027	0.986	273.757	0.00383784	NA	0.00248649	0.536737	3.76	0.0101622	0.00397297	19	38	0.00781081
63162_3	241	24weeks	Brown	Katie	11	Leah	Leah	Katie	11	NA	NA	22	309	3.89	0.0117523	72	9787.5	0.00287009	0.659	196.635	0.00362538	160456	0.00238671	0.596581	5.43	0.0164048	0.00356495	22	40	0.00719033
63162_4	241	24weeks	Black.Hood	Katie	12	Leah	Leah	Katie	12	NA	NA	36	272	4.38	0.0142208	79	10500	0.00272727	1.841	301.868	0.00324675	95314	0.00227273	0.462389	5.73	0.0186039	0.00337662	20	39.5	0.00662338
63167_3	213	24weeks	Black.Hood	Katie	11	Leah	Leah	Katie	11	NA	NA	26	287	6.78	0.0216613	75	10462.5	0.0028754	1.405	432.21	0.0029393	167094	0.00169329	0.49438	19.1	0.0610224	0.00332268	20	37	0.00626198
63167_4	213	24weeks	Brown.Hood	Katie	12	Leah	Leah	Katie	12	NA	NA	47	304	5.93	0.0168946	76	8677.5	0.00262108	1.147	239.452	0.00299145	99099	0.00316239	0.515364	6.92	0.0197151	0.00339031	20	38	0.00638177
63168_3	226	24weeks	Brown	Katie	9	Leah	Leah	Nick	9	NA	NA	26	314	5.35	0.0157353	69	9157.5	0.003	1.345	247.507	0.0035	101835	0.0025	0.508241	4.47	0.0131471	0.00367647	18	35.5	0.00717647
63168_4	226	24weeks	Brown.Hood	Katie	13	Leah	Leah	Nick	10	NA	NA	28	346	3.84	0.0102674	77	8550	0.00270053	1.938	328.373	0.00374332	NA	0.00149733	0.460015	5.27	0.0140909	0.00347594	18	37	0.00721925
63188_3	170	24weeks	Brown.Hood	Jaime	9	Katie	Katie	Katie	9	NA	NA	43	365	3.37	0.0082598	66	NA	0.00272059	1.202	NA	0.00330882	118944	0.00306373	0.526469	5.13	0.0125735	0.00345588	21	41.5	0.00676471
63197_3	243	24weeks	Black	Jaime	5	Katie	Katie	Katie	5	NA	NA	29	264	4.98	0.0169966	82	10710	0.00300341	1.765	265.2	0.00290102	103686	0.00348123	0.462843	3.99	0.0136177	0.00317406	21	38	0.00607509
63197_4	243	24weeks	Black.Hood	Jaime	6	Katie	Katie	Katie	6	NA	NA	47	363	10.28	0.0250732	80	10365	0.00336585	0.894	212.977	0.00285366	209567	0.00236585	0.53925	8.41	0.0205122	0.00307317	23	43.5	0.00592683
63197_5	243	24weeks	Black	Jaime	7	Katie	Katie	Katie	7	NA	NA	18	307	4.27	0.0131385	81	10080	0.00283077	0.864	170.475	0.00332308	148463	0.00292308	0.542006	4.26	0.0131077	0.00310769	20	38.5	0.00643077
63197_6	243	24weeks	Black.Hood	Jaime	8	Katie	Katie	Katie	8	NA	NA	39	388	6.73	0.0157611	66	11295	0.00271663	1.149	353.415	0.0029274	208264	0.00283372	0.531953	19.17	0.0448946	0.00320843	19	40	0.00613583
63199_3	222	24weeks	Black.Hood	Katie	7	Leah	Leah	Nick	7	NA	NA	67	278	4.13	0.011971	69	7095	0.00742029	0.795	142.732	0.00301449	NA	0.00202899	0.574972	3.3	0.00956522	0.00289855	17	35	0.00591304
63199_4	222	24weeks	Black.Hood	Katie	8	Leah	Leah	Nick	8	NA	NA	32	350	4.48	0.0117277	87	12367.5	0.00340314	1.005	216.607	0.00337696	NA	0.00188482	0.515017	4.64	0.0121466	0.00337696	18	36.5	0.00675393
63200_3	254	24weeks	Black.Hood	Katie	5	Leah	Leah	Nick	5	NA	NA	23	285	4.3	0.013961	76	9622.5	0.00301948	1.832	269.723	0.00344156	NA	0.00233766	0.466475	3.26	0.0105844	0.00337662	16	34	0.00681818
63200_4	254	24weeks	Black	Katie	6	Leah	Leah	Nick	6	NA	NA	36	343	4.07	0.0107388	74	11767.5	0.00345646	0.496	172.327	0.00369393	NA	0.00248021	0.639095	3.48	0.00918206	0.00332454	19	37	0.00701847
63202_3	215	24weeks	Brown	Katie	5	Leah	Leah	Nick	5	NA	NA	59	321	2.72	0.00715789	80	9075	0.003	NA	NA	0.00331579	NA	0.00213158	NA	4.71	0.0123947	0.00357895	18	36	0.00689474
63227_3	223	24weeks	Black.Hood	Katie	7	Leah	Leah	Nick	7	NA	NA	48	321	7.47	0.0202439	99	11737.5	0.00409214	0.886	130.882	0.00349593	182743	0.00189702	0.51465	3.88	0.0105149	0.00330623	19	37.5	0.00680217
63227_4	223	24weeks	Black.Hood	Katie	8	Leah	Leah	Nick	8	NA	NA	51	325	3.44	0.00914894	87	10155	0.00343085	0.963	142.53	0.00319149	100208	0.00255319	0.519981	3.74	0.00994681	0.0031383	19	37	0.00632979
63229_3	244	24weeks	Black	Katie	11	Leah	Leah	Katie	11	NA	NA	31	345	7.33	0.0194947	75	10035	0.0024734	0.456	71.6325	0.00324468	230609	0.00367021	0.651879	6.22	0.0165426	0.00337766	20	38	0.00662234
63229_4	244	24weeks	Brown	Katie	12	Leah	Leah	Katie	12	NA	NA	21	316	5.08	0.0150742	81	9765	0.00275964	1.831	197.062	0.00323442	170680	0.00296736	0.46058	4.95	0.0146884	0.00317507	20	37.5	0.0064095
63237_3	219	24weeks	Brown.Hood	Katie	13	Leah	Leah	Nick	7	NA	NA	22	378	5.6	0.014	78	10245	0.003825	NA	NA	0.003375	NA	0.001675	NA	5.46	0.01365	0.0034	19	37	0.006775
63237_4	219	24weeks	Black.Hood	Katie	8	Leah	Leah	Nick	8	NA	NA	24	362	4.98	0.0129016	74	10207.5	0.00367876	1.227	258.967	0.00352332	NA	0.00173575	0.510705	5.46	0.0141451	0.00357513	19	38	0.00709845
63238_3	249	24weeks	Brown.Hood	Katie	5	Leah	Leah	Katie	5	NA	NA	9	270	2.22	0.00795699	69	7965	0.00311828	0.883	127.005	0.00362007	NA	0.00297491	0.560284	2.22	0.00795699	0.00351254	18	38.5	0.00713262
63238_4	249	24weeks	Albino	Katie	6	Leah	Leah	Nick	6	NA	NA	23	278	3.04	0.0100997	66	8797.5	0.00335548	0.646	91.5	0.00405316	NA	0.0027907	0.613581	3.06	0.0101661	0.00372093	17	35	0.00777409
63244_3	211	24weeks	Albino	Katie	3	Leah	Leah	Nick	3	NA	NA	46	323	11.21	0.0303794	80	9930	0.00287263	NA	NA	0.00338753	NA	0.00265583	NA	4.58	0.0124119	0.00352304	16	31	0.00691057
63245_3	218	24weeks	Brown.Hood	Katie	1	Leah	Leah	Nick	1	NA	NA	35	306	3.71	0.0108798	83	9720	0.0040176	1.329	171.007	0.00378299	NA	0.00296188	0.489571	4.38	0.0128446	0.00363636	17	34.5	0.00741935
63245_4	218	24weeks	Brown.Hood	Katie	2	Leah	Leah	Nick	2	NA	NA	28	305	4.13	0.0124024	78	10117.5	0.00399399	1.564	256.702	0.00366366	NA	0.00288288	0.47931	5.69	0.0170871	0.00393393	18	33	0.0075976
63246_3	221	24weeks	Black.Hood	Katie	7	Leah	Leah	Nick	7	NA	NA	16	350	5.59	0.0152732	78	8752.5	0.00284153	NA	NA	0.00314208	NA	0.00193989	NA	4.88	0.0133333	0.00281421	17	34.5	0.00595628
63246_4	221	24weeks	Black.Hood	Katie	8	Leah	Leah	Nick	8	NA	NA	86	311	6.29	0.0158438	85	11175	0.00324937	NA	NA	0.0034005	NA	0.00236776	NA	5.78	0.0145592	0.00322418	18	36	0.00662469
63247_3	224	24weeks	Brown	Katie	9	Leah	Leah	Katie	9	NA	NA	45	302	3.65	0.0105187	73	7890	0.00273775	NA	NA	0.00334294	NA	0.00244957	NA	3	0.00864553	0.00340058	18	37	0.00674352
63247_4	224	24weeks	Brown.Hood	Katie	10	Leah	Leah	Katie	10	NA	NA	41	314	3.81	0.0107324	69	7575	0.00259155	NA	NA	0.00394366	NA	0.00273239	NA	3.88	0.0109296	0.0036338	20	38	0.00757746
63248_3	231	24weeks	Albino	Katie	3	Leah	Leah	Nick	3	NA	NA	37	307	4	0.0116279	92	10815	0.00383721	1.702	284.033	0.00386628	NA	0.00276163	0.455633	3.48	0.0101163	0.00377907	17	35	0.00764535
63248_4	231	24weeks	Albino	Katie	4	Leah	Leah	Nick	4	NA	NA	66	255	4.65	0.014486	80	10027.5	0.00339564	1.498	244.268	0.00358255	NA	0.00267913	0.481093	2.98	0.00928349	0.00361371	17	35	0.00719626
63250_3	252	24weeks	Black	Katie	11	Leah	Leah	Katie	11	NA	NA	58	415	11.51	0.024334	89	10155	0.00306554	NA	NA	0.0030444	NA	0.00211416	NA	15.81	0.0334249	0.00312896	22	42	0.00617336
63250_4	252	24weeks	Black	Katie	12	Leah	Leah	Katie	12	NA	NA	43	376	8.74	0.0208592	86	9952.5	0.00279236	NA	NA	0.00274463	NA	0.00183771	NA	9.1	0.0217184	0.00303103	22	40.5	0.00577566
63265_3	238	24weeks	Black	Katie	11	Leah	Leah	Nick	11	NA	NA	36	327	5.17	0.0142424	79	10035	0.00360882	0.823	155.887	0.00358127	NA	0.0022314	0.551564	6.48	0.0178512	0.00352617	18	35.5	0.00710744
63265_4	238	24weeks	Brown	Katie	12	Leah	Leah	Nick	12	NA	NA	17	291	2.54	0.00824675	68	10582.5	0.00428571	0.529	128.618	0.00470779	NA	0.00292208	0.642688	2.5	0.00811688	0.00331169	18	36	0.00801948
63267_3	244	24weeks	Brown.Hood	Katie	1	Leah	Leah	Katie	1	NA	NA	23	340	5.36	0.0147658	75	10065	0.00253444	2.543	256.598	0.00322314	75648	0.00344353	0.438518	4.41	0.0121488	0.00327824	20	39	0.00650138
63267_4	244	24weeks	Black.Hood	Katie	2	Leah	Leah	Katie	2	NA	NA	31	320	6.38	0.0181766	79	9450	0.00287749	1.987	321.75	0.00316239	82165	0.00242165	0.45541	6.8	0.0193732	0.00319088	20.5	38.5	0.00635328
63277_3	228	24weeks	Black	Katie	11	Leah	Leah	Katie	11	NA	NA	54	355	9.74	0.0238142	84	9142.5	0.00242054	NA	NA	0.00290954	101831	0.00288509	NA	6.55	0.0160147	0.00315403	20	39	0.00606357
63278_3	229	24weeks	Black	Katie	3	Leah	Leah	Katie	3	NA	NA	31	359	10.91	0.0279744	75	11242.5	0.00269231	2.194	228.3	0.00364103	156444	0.00323077	0.451203	10.84	0.0277949	0.00379487	20	39.5	0.0074359
63278_4	229	24weeks	Black	Katie	4	Leah	Leah	Katie	4	NA	NA	41	373	11.72	0.0283092	82	11100	0.00256039	1.842	272.4	0.00306763	112939	0.00236715	0.458904	8.88	0.0214493	0.00357488	21	39.5	0.00664251
63279_3	243	24weeks	Black.Hood	Katie	5	Leah	Leah	Katie	5	NA	NA	61	320	8.06	0.0211549	77	11917.5	0.00286089	1.755	245.415	0.00288714	143704	0.00354331	0.469314	6.61	0.0173491	0.00322835	22	40	0.00611549
63279_4	243	24weeks	Black	Katie	6	Leah	Leah	Katie	6	NA	NA	37	290	3.65	0.0111621	91	15150	0.00266055	0.593	165.645	0.00327217	218519	0.00247706	0.577335	3.72	0.0113761	0.00342508	19	37	0.00669725
63280_3	248	24weeks	Black	Katie	13	Leah	Leah	Katie	7	NA	NA	34	287	2.61	0.00813084	63	9352.5	0.0028972	0.316	64.9725	0.00339564	76414	0.00271028	0.769807	3.15	0.00981308	0.00305296	20	38	0.0064486
63280_4	248	24weeks	Brown	Katie	8	Leah	Leah	Katie	8	NA	NA	30	283	4.11	0.013131	81	9435	0.0028754	0.925	175.343	0.00329073	68559	0.00297125	0.53344	4.77	0.0152396	0.00300319	20	38	0.00629393
63281_3	256	24weeks	Black.Hood	Katie	9	Leah	Leah	Katie	9	NA	NA	31	316	6.5	0.018732	77	10515	0.00282421	0.793	105.772	0.00268012	71160	0.00288184	0.559984	7.26	0.0209222	0.00299712	21	38	0.00567723
63281_4	256	24weeks	Black.Hood	Katie	10	Leah	Leah	Katie	10	NA	NA	27	318	8.01	0.0232174	81	11835	0.00295652	0.999	168.165	0.00286957	89835	0.00315942	0.524095	7.04	0.0204058	0.00310145	19	38	0.00597101
63292_3	210	24weeks	Albino	Katie	7	Leah	Leah	Katie	7	NA	NA	11	352	4.61	0.0126997	68	8332.5	0.00286501	1.283	211.732	0.0031405	122883	0.00305785	0.515269	3.34	0.0092011	0.00319559	21	38	0.00633609
63292_4	210	24weeks	Albino	Katie	8	Leah	Leah	Katie	8	NA	NA	33	360	7.13	0.0181425	72	9292.5	0.00274809	1.501	421.118	0.00333333	106167	0.00305344	0.491711	4.83	0.0122901	0.00333333	22	41.5	0.00666667
63292_5	210	24weeks	Albino	Katie	9	Leah	Leah	Katie	9	NA	NA	21	323	5.28	0.0153488	68	8205	0.00267442	1.494	379.11	0.0031686	121684	0.00276163	0.498291	3.39	0.00985465	0.00325581	22	41	0.00642442
63292_6	210	24weeks	Albino	Katie	10	Leah	Leah	Katie	10	NA	NA	48	300	4.08	0.0117241	66	8175	0.00341954	0.649	137.52	0.00341954	163309	0.00232759	0.612824	1.72	0.00494253	0.00321839	19	37	0.00663793
63293_3	212	24weeks	Black.Hood	Katie	3	Leah	Leah	Nick	3	NA	NA	45	368	11.45	0.027724	67	9750	0.00288136	2.107	495.293	0.00326877	109422	0.00217918	0.465173	6.09	0.0147458	0.00322034	20	39	0.0064891
63293_4	212	24weeks	Albino	Katie	4	Leah	Leah	Nick	4	NA	NA	39	321	9.63	0.02675	71	10207.5	0.00291667	1.834	565.23	0.00302778	119532	0.00213889	0.47289	6.03	0.01675	0.00330556	20	37.5	0.00633333
63294_3	214	24weeks	Black.Hood	Katie	9	Leah	Leah	Katie	9	NA	NA	41	354	8.79	0.0222532	69	8415	0.00268354	2.662	468.683	0.00306329	90415	0.00268354	0.441685	8.77	0.0222025	0.00324051	19.5	39	0.0063038
63294_4	214	24weeks	Black.Hood	Katie	10	Leah	Leah	Katie	10	NA	NA	35	280	4.56	0.0144762	66	9127.5	0.00314286	0.839	270.293	0.00320635	121950	0.00253968	0.573623	4.37	0.013873	0.0035873	18.5	37	0.00679365
63296_3	216	24weeks	Albino	Katie	5	Leah	Leah	Nick	5	NA	NA	50	360	4.81	0.0117317	77	9757.5	0.00326829	1.11	268.005	0.00353659	87385	0.00221951	0.517648	3.92	0.00956098	0.0037561	20	39	0.00729268
63296_4	216	24weeks	Brown	Katie	6	Leah	Leah	Katie	6	NA	NA	51	330	5.57	0.0146194	76	8190	0.00304462	1.069	239.235	0.00356955	109506	0.00223097	0.523617	4.54	0.011916	0.00322835	20	37.5	0.0067979
63298_4	219	24weeks	Brown.Hood	Katie	5	Leah	Leah	Cary	5	NA	NA	34	397	3.36	0.00779582	81	11782.5	0.00313225	0.719	155.595	0.00324826	82931	0.00234339	0.566504	7.65	0.0177494	0.00320186	22.5	41.5	0.00645012
63298_5	219	24weeks	Brown.Hood	Katie	6	Leah	Leah	Cary	6	NA	NA	40	382	5.09	0.0120616	84	14310	0.00329384	1.59	381.015	0.00315166	84928	0.00163507	0.470438	10.3	0.0244076	0.00305687	23	40.5	0.00620853
63302_3	226	24weeks	Black	Katie	7	Leah	Leah	Cary	7	NA	NA	38	298	1.85	0.00550595	78	8610	0.00258929	2.699	426.345	0.0033631	119895	0.0022619	0.430423	4.17	0.0124107	0.00333333	23	41	0.00669643
63304_3	232	24weeks	Albino	Katie	5	Leah	Leah	Nick	5	NA	NA	35	312	6.08	0.0175216	81	10980	0.00345821	5.055	277.522	0.0032853	259444	0.00207493	0.382818	6.77	0.0195101	0.00337176	19	35.5	0.00665706
63304_4	232	24weeks	Black.Hood	Katie	6	Leah	Leah	Nick	6	NA	NA	58	333	8.78	0.0224552	69	9450	0.00324808	1.862	279.405	0.00322251	304667	0.00184143	0.474197	6.58	0.0168286	0.00332481	20	37.5	0.00654731
63305_3	234	24weeks	Brown.Hood	Katie	7	Leah	Leah	Katie	7	NA	NA	36	286	4.35	0.0135093	77	10785	0.00335404	0.857	187.657	0.00391304	131632	0.00270186	0.54961	3.82	0.0118634	0.0036646	19	39	0.00757764
63305_4	234	24weeks	Brown	Katie	8	Leah	Leah	Katie	8	NA	NA	37	304	3.59	0.0105279	81	10822.5	0.00322581	0.716	155.055	0.00387097	84810	0.00246334	0.567087	3.12	0.00914956	0.00351906	21	42	0.00739003
63306_3	238	24weeks	Black	Katie	7	Leah	Leah	Katie	7	NA	NA	28	296	2.46	0.00759259	76	9585	0.00305556	1.157	350.07	0.00333333	107585	0.0032716	0.514364	4.52	0.0139506	0.00361111	21	38	0.00694444
63306_4	238	24weeks	Brown	Katie	8	Leah	Leah	Katie	8	NA	NA	31	300	4.26	0.0128701	77	9675	0.00338369	1.866	279.308	0.00362538	89022	0.00271903	0.46352	2.97	0.00897281	0.00329305	21.5	38	0.00691843
63307_3	240	24weeks	Albino	Katie	1	Leah	Leah	Nick	1	NA	NA	43	307	5.32	0.0152	82	9720	0.00322857	2.87	360.127	0.0036	NA	0.00265714	0.421639	5.3	0.0151429	0.00331429	17	33	0.00691429
63307_4	240	24weeks	Brown.Hood	Katie	2	Leah	Leah	Nick	2	NA	NA	42	333	4.96	0.0132267	77	8302.5	0.00344	1.21	190.2	0.00336	200051	0.00208	0.507801	4.67	0.0124533	0.00344	19	38	0.0068
63308_3	251	24weeks	Black	Katie	8	Leah	Leah	Katie	8	NA	NA	32	321	3.38	0.00957507	89	9180	0.00376771	1.759	230.572	0.00303116	67149	0.00399433	0.455652	4.3	0.0121813	0.00300283	20	30	0.00603399
63308_4	251	24weeks	Black.Hood	Katie	9	Leah	Leah	Katie	9	NA	NA	25	323	5.22	0.015	82	9555	0.00341954	0.931	214.387	0.00284483	57755	0.00281609	0.531134	4.25	0.0122126	0.00281609	22	43	0.00566092
63312_3	218	24weeks	Brown.Hood	Katie	1	Leah	Leah	Nick	1	NA	NA	32	295	4.22	0.0129052	83	11782.5	0.00388379	1.237	321.84	0.00311927	NA	0.00183486	0.497154	7.6	0.0232416	0.00318043	16.5	33.5	0.00629969
63312_4	218	24weeks	Brown.Hood	Katie	2	Leah	Leah	Nick	2	NA	NA	4	261	2.54	0.00958491	88	11197.5	0.004	0.926	197.58	0.00373585	NA	0.00237736	0.523261	3.15	0.0118868	0.00392453	16	32.5	0.00766038
63313_3	227	24weeks	Brown	Katie	10	Leah	Leah	Katie	10	NA	NA	39	290	5.25	0.0159574	73	10695	0.00261398	1.149	275.092	0.00328267	66775	0.00337386	0.519847	4.54	0.0137994	0.003769	20	38	0.00705167
63313_4	227	24weeks	Brown.Hood	Katie	11	Leah	Leah	Katie	11	NA	NA	42	346	6.09	0.0156959	81	9315	0.00247423	1.114	234.308	0.00314433	109468	0.00280928	0.511412	5.16	0.013299	0.0032732	21	39	0.00641753
63315_3	243	24weeks	Black	Katie	3	Leah	Leah	Nick	3	NA	NA	31	304	5.34	0.0159403	100	12352.5	0.00310448	0.468	75.9	0.00325373	NA	0.00170149	0.598714	5.71	0.0170448	0.00352239	18	35	0.00677612
63315_4	243	24weeks	Black.Hood	Katie	4	Leah	Leah	Nick	4	NA	NA	53	397	8.38	0.0186222	90	11947.5	0.00306667	0.633	99.09	0.00342222	NA	0.00126667	0.569591	7.05	0.0156667	0.00395556	19	39	0.00737778
63324_3	211	24weeks	Albino	Katie	7	Leah	Leah	Cary	7	NA	NA	31	382	5.7	0.0138015	80	11707.5	0.00239709	1.418	347.183	0.00375303	142689	0.001477	0.486673	4.88	0.011816	0.00343826	23	43	0.00719128
63324_4	211	24weeks	Black.Hood	Katie	8	Leah	Leah	Cary	8	NA	NA	7	323	4.28	0.0129697	88	12952.5	0.00260606	1.491	328.973	0.00363636	98438	0.00318182	0.472152	4.48	0.0135758	0.00342424	22	40	0.00706061
63327_3	229	24weeks	Black	Katie	11	Leah	Leah	Cary	11	NA	NA	23	275	3.16	0.010604	76	9750	0.00288591	1.43	195.232	0.00409396	NA	0.00147651	0.491123	3.14	0.0105369	0.00369128	22	38.5	0.00778523
63328_3	232	24weeks	Black	Katie	5	Leah	Leah	Cary	5	NA	NA	44	277	7.27	0.022648	87	11362.5	0.00308411	2.322	592.628	0.00314642	176250	0.000996885	0.433768	8.6	0.0267913	0.00333333	22.5	38.5	0.00647975
63328_4	232	24weeks	Brown	Katie	6	Leah	Leah	Cary	6	NA	NA	23	329	8.9	0.0252841	90	12180	0.00286932	2.356	536.985	0.00321023	149231	0.00221591	0.429845	7.36	0.0209091	0.00326705	22	38	0.00647727
63329_3	242	24weeks	Black	Katie	1	Leah	Leah	Katie	1	NA	NA	33	297	5.59	0.0169394	92	10095	0.00263636	1.063	202.792	0.00306061	110884	0.00260606	0.502431	5.91	0.0179091	0.00275758	19	37	0.00581818
63329_4	242	24weeks	Black.Hood	Katie	2	Leah	Leah	Katie	2	NA	NA	49	336	6.1	0.0158442	86	12232.5	0.00296104	0.971	251.512	0.00316883	108688	0.00241558	0.520368	6.5	0.0168831	0.00332468	21	40	0.00649351
63330_3	249	24weeks	Brown.Hood	Katie	7	Leah	Leah	Katie	7	NA	NA	11	298	3.58	0.0115858	79	8947.5	0.00271845	0.476	171.96	0.00313916	NA	0.00278317	0.634826	2.66	0.00860841	0.00352751	19	38	0.00666667
63330_4	249	24weeks	Brown	Katie	8	Leah	Leah	Katie	8	NA	NA	21	254	2.49	0.00905455	67	9060	0.00367273	0.43	127.335	0.00410909	NA	0.00258182	0.685146	2.17	0.00789091	0.00370909	21	40	0.00781818
63331_3	255	24weeks	Brown.Hood	Katie	9	Leah	Leah	Cary	9	NA	NA	43	320	4.49	0.0123691	71	9795	0.00256198	2.145	326.873	0.00305785	NA	0.00151515	0.458151	7.73	0.0212948	0.0030854	23	40	0.00614325
63331_4	255	24weeks	Brown.Hood	Katie	13	Leah	Leah	Cary	10	NA	NA	26	351	6.68	0.0177188	85	9757.5	0.00251989	1.207	278.415	0.00262599	174603	0.00167109	0.497234	8.06	0.0213793	0.00281167	24	41.5	0.00543767
63332_3	239	24weeks	Brown	Katie	1	Leah	Leah	Katie	1	NA	NA	49	383	9.76	0.0225926	83	10455	0.003125	2.021	340.447	0.00349537	79936	0.00289352	0.44951	7.9	0.018287	0.00342593	21	40	0.0069213
63332_4	239	24weeks	Black.Hood	Katie	2	Leah	Leah	Cary	2	NA	NA	38	329	4.42	0.0120436	88	11842.5	0.00337875	1.42	302.385	0.003297	135048	0.00343324	0.476924	4.25	0.0115804	0.00324251	21	40	0.00653951
63332_5	239	24weeks	Black	Katie	3	Leah	Leah	Cary	3	NA	NA	37	391	8.26	0.0192991	88	13027.5	0.00317757	2.78	398.918	0.00271028	142415	0.00123832	0.418668	9.45	0.0220794	0.00242991	22.5	41.5	0.00514019
63332_6	239	24weeks	Black.Hood	Katie	4	Leah	Leah	Nick	4	NA	NA	23	374	7.15	0.0180101	86	10477.5	0.00360202	3.066	478.53	0.00387909	90140	0.00324937	0.41304	5.04	0.0126952	0.00327456	30	39	0.00715365
63335_4	213	24weeks	Black.Hood	Katie	11	Leah	Leah	Nick	11	NA	NA	22	285	6.15	0.0200326	78	12277.5	0.00302932	1.332	175.238	0.00309446	130635	0.00276873	0.495884	6.94	0.0226059	0.00312704	19	37	0.0062215
63337_3	220	24weeks	Black.Hood	Katie	1	Leah	Leah	Cary	1	NA	NA	31	385	6.64	0.0159615	87	11955	0.00322115	1.617	285.502	0.00396635	61927	0.00264423	0.4655	7	0.0168269	0.00367788	23	42	0.00764423
63337_4	220	24weeks	Brown.Hood	Katie	2	Leah	Leah	Cary	2	NA	NA	25	354	5.5	0.0145119	83	12562.5	0.00316623	1.129	333.308	0.00379947	78361	0.00218997	0.507158	6.3	0.0166227	0.00340369	22	39.5	0.00720317
63337_5	220	24weeks	Brown.Hood	Katie	3	Leah	Leah	Cary	3	NA	NA	41	376	4.51	0.0108153	79	11167.5	0.00273381	0.673	122.955	0.00294964	112606	0.00158273	0.579494	4.26	0.0102158	0.00321343	23	41	0.00616307
63337_6	220	24weeks	Brown.Hood	Katie	4	Leah	Leah	Cary	4	NA	NA	21	330	5.21	0.0148433	70	8632.5	0.00336182	1.72	251.595	0.00347578	203349	0.00245014	0.480624	5.84	0.0166382	0.00333333	23	40	0.00680912
63339_3	225	24weeks	Brown	Katie	9	Leah	Leah	Cary	9	NA	NA	37	309	1.85	0.00534682	76	8962.5	0.00286127	1.606	227.048	0.00372832	109774	0.0033237	0.479258	3.85	0.0111272	0.00372832	23	41	0.00745665
63339_4	225	24weeks	Black	Katie	10	Leah	Leah	Katie	10	NA	NA	60	366	6.86	0.0161033	81	8895	0.00279343	3.221	485.288	0.00314554	127046	0.00255869	0.413826	10.31	0.0242019	0.00305164	22	39	0.00619718
63340_3	227	24weeks	Brown	Katie	5	Leah	Leah	Cary	5	NA	NA	27	306	3.75	0.0112613	80	8625	0.0024024	1.849	248.7	0.00363363	71461	0.00267267	0.460824	4.86	0.0145946	0.00357357	21	39	0.00720721
63340_4	227	24weeks	Brown	Katie	6	Leah	Leah	Cary	6	NA	NA	35	335	6.71	0.0181351	81	9375	0.00243243	1.67	311.197	0.00345946	116762	0.0017027	0.469219	5.98	0.0161622	0.00332432	21	39	0.00678378
63346_3	252	24weeks	Black	Katie	11	Leah	Leah	Katie	11	NA	NA	38	326	4.14	0.0113736	94	10837.5	0.00304945	1.179	274.2	0.00274725	56475	0.00277473	0.489083	5.46	0.015	0.00304945	20	38	0.0057967
63346_4	252	24weeks	Black	Katie	12	Leah	Leah	Katie	12	NA	NA	29	368	4.75	0.0119647	86	10170	0.00289673	1.491	210.795	0.00287154	179152	0.0024937	0.474389	5.85	0.0147355	0.00299748	20.5	39	0.00586902
63350_4	219	24weeks	Brown.Hood	Katie	9	Leah	Leah	Katie	9	NA	NA	17	366	5.84	0.015248	85	10642.5	0.0035248	1.633	329.392	0.00344648	159097	0.0024282	0.466765	6.12	0.0159791	0.00339426	20	39	0.00684073
63358_3	253	24weeks	Black.Hood	Katie	10	Leah	Leah	Katie	10	NA	NA	38	305	4.78	0.0139359	91	11220	0.00285714	1.479	271.897	0.00323615	96955	0.00195335	0.469702	5.15	0.0150146	0.00361516	20	37	0.00685131
63358_4	253	24weeks	Black.Hood	Katie	11	Leah	Leah	Katie	11	NA	NA	26	366	4.87	0.0124235	86	10275	0.00293367	1.605	187.118	0.00387755	94914	0.00206633	0.467296	3.62	0.00923469	0.00364796	20	40	0.00752551
63367_3	218	24weeks	Brown.Hood	Jaime	5	Leah	Leah	Nick	5	NA	NA	18	294	3.27	0.0104808	71	10447.5	0.00365385	0.477	182.67	0.00336538	31344	0.00195513	0.65369	4.35	0.0139423	0.00320513	17	34	0.00657051
63367_4	218	24weeks	Brown.Hood	Jaime	6	Leah	Leah	Nick	6	NA	NA	26	292	3.36	0.010566	78	11505	0.00408805	0.689	189.442	0.00355346	142902	0.00160377	0.57793	4.82	0.0151572	0.00333333	18	34	0.00688679
63369_4	228	24weeks	Brown	Jaime	12	Leah	Leah	Nick	12	NA	NA	22	324	12.37	0.0357514	84	10612.5	0.00260116	1.171	324.285	0.00303468	103122	0.00236994	0.501797	5.34	0.0154335	0.00291908	18	34.5	0.00595376
63372_4	255	24weeks	Black.Hood	Jaime	8	Leah	Leah	Nick	8	NA	NA	26	335	3.13	0.00867036	76	9450	0.00310249	0.576	147.21	0.00313019	69658	0.00307479	0.609297	4.72	0.0130748	0.0031856	18	37	0.00631579
63373_3	256	24weeks	Black.Hood	Jaime	3	Leah	Leah	Nick	3	NA	NA	12	350	6.57	0.0181492	75	10567.5	0.00323204	0.805	101.76	0.00290055	109108	0.00179558	0.561527	6.86	0.0189503	0.00281768	20	38	0.00571823
63378_3	231	24weeks	Black.Hood	Katie	7	Leah	Leah	Nick	7	NA	NA	15	331	4.04	0.0116763	85	11115	0.00369942	0.86	233.52	0.00358382	96875	0.00184971	0.536504	2.75	0.00794798	0.00346821	20	38	0.00705202
63378_4	231	24weeks	Brown.Hood	Katie	8	Leah	Leah	Nick	8	NA	NA	8	313	3.44	0.0107165	78	10050	0.00336449	1.209	218.4	0.0034891	79105	0.0023676	0.506452	3.06	0.00953271	0.00302181	20	38	0.0065109
63381_3	240	24weeks	Black.Hood	Katie	1	Leah	Leah	Nick	1	NA	NA	32	369	3.5	0.00872818	85	11407.5	0.00396509	0.762	136.545	0.00304239	97519	0.00269327	0.552067	3.89	0.00970075	0.00321696	18	37	0.00625935
63381_4	240	24weeks	Brown.Hood	Katie	2	Leah	Leah	Nick	2	NA	NA	27	376	4.82	0.0119603	79	10792.5	0.00322581	0.994	183.96	0.00307692	75907	0.002134	0.527701	4.2	0.0104218	0.00315136	20	38.5	0.00622829
63382_3	252	24weeks	Black	Katie	9	Leah	Leah	Nick	9	NA	NA	40	439	9.71	0.0202714	84	9330	0.00346555	1.878	361.995	0.00290188	119429	0.00189979	0.454964	10.32	0.0215449	0.00306889	21	40.5	0.00597077
63382_4	252	24weeks	Black.Hood	Katie	10	Leah	Leah	Nick	10	NA	NA	17	431	7.8	0.0174107	82	9435	0.00290179	1.437	343.71	0.00303571	124818	0.00196429	0.482795	10.14	0.0226339	0.00308036	20	40	0.00611607
63385_3	246	24weeks	Albino	Katie.Nick	11	Leah.Katie	Leah	Nick	11	NA	NA	14	324	3.77	0.0111538	81	9262.5	0.00325444	1.154	181.215	0.00304734	102551	0.00204142	0.507436	3.95	0.0116864	0.0033432	19	36	0.00639053
63385_4	246	24weeks	Albino	Katie.Nick	12	Leah.Katie	Leah	Nick	12	NA	NA	18	303	3.57	0.0111215	83	9592.5	0.00367601	1.319	254.303	0.00320872	82537	0.00255452	0.490359	4.17	0.0129907	0.00323988	20	38	0.0064486
63392_3	226	24weeks	Brown.Hood	Katie	1	Leah	Leah	Nick	1	NA	NA	21	279	2.02	0.00673333	86	9592.5	0.00313333	2.083	324.548	0.0033	89056	0.0024	0.443816	3	0.01	0.00313333	17	36.5	0.00643333
63407_4	256	24weeks	Black.Hood	Katie	10	Leah	Leah	Nick	10	NA	NA	14	289	6.1	0.020132	75	10920	0.00343234	1.721	361.012	0.00343234	26313	0.00211221	0.473745	5.88	0.0194059	0.00330033	18	37	0.00673267
63407_6	256	24weeks	Black.Hood	Katie	12	Leah	Leah	Nick	12	NA	NA	8	271	4.07	0.0145878	85	10080	0.00315412	1.177	286.47	0.00358423	109928	0.00297491	0.499951	3.86	0.0138351	0.00351254	17	33.5	0.00709677
63410_3	211	24weeks	Albino	Katie.Nick	3	Leah.Katie	Leah	Nick	3	NA	NA	35	330	6.63	0.0181644	81	11790	0.00317808	1.682	199.605	0.00347945	173395	0.00235616	0.468535	3.25	0.00890411	0.00331507	19	37	0.00679452
63425_3	234	24weeks	Black.Hood	Nick	3	Katie	Katie	Nick	3	NA	NA	32	376	4.56	0.0111765	87	13125	0.00404412	1.656	316.402	0.00286765	69506	0.00208333	0.463268	5.16	0.0126471	0.00284314	21	40	0.00571078
63428_3	250	24weeks	Albino	Katie.Nick	9	Leah.Katie	Leah	Nick	9	NA	NA	22	369	7.8	0.0199488	82	9427.5	0.00327366	2.345	265.312	0.00327366	84486	0.00273657	0.437837	9.28	0.023734	0.00340153	21	40	0.00667519
63428_4	250	24weeks	Brown	Katie.Nick	10	Leah.Katie	Leah	Nick	10	NA	NA	17	328	4.42	0.0128116	87	12352.5	0.00327536	1.372	183.113	0.00342029	55477	0.00310145	0.481493	5.1	0.0147826	0.00318841	21	40	0.0066087
63430_3	253	24weeks	Black.Hood	Nick	10	Katie	Katie	Nick	10	NA	NA	31	362	9.48	0.0241221	91	12315	0.0029771	1.172	400.793	0.00315522	53102	0.00323155	0.493104	6.96	0.0177099	0.00292621	21	38.5	0.00608142
63430_4	253	24weeks	Black.Hood	Nick	11	Katie	Katie	Nick	11	NA	NA	25	293	4.15	0.0130503	82	9862.5	0.00295597	1.087	273.045	0.00283019	67842	0.00238994	0.512809	3.67	0.0115409	0.00286164	18	36	0.00569182
63437_4	256	24weeks	Black.Hood	Katie	2	Leah	Leah	Nick	2	NA	NA	23	273	6.34	0.0214189	77	10140	0.00347973	1.331	155.565	0.00304054	61773	0.00327703	0.497347	5.07	0.0171284	0.00314189	19	35	0.00618243
63437_7	256	24weeks	Black.Hood	Katie	5	Leah	Leah	Nick	5	NA	NA	13	317	5.7	0.0172727	74	10710	0.003	1.365	315.983	0.00284848	73720	0.00281818	0.498911	7.3	0.0221212	0.00263636	20	35.5	0.00548485
63437_8	256	24weeks	Black.Hood	Katie	6	Leah	Leah	Nick	6	NA	NA	14	296	6.42	0.0207097	72	11910	0.00312903	1.754	270.142	0.00309677	74927	0.00264516	0.475882	5.43	0.0175161	0.00322581	19	36	0.00632258
63443_3	213	24weeks	Black.Hood	Nick	1	Leah	Leah	Nick	1	NA	NA	29	306	6.79	0.0202687	76	9862.5	0.00286567	0.605	61.2525	0.00313433	NA	0.00325373	0.601479	5.94	0.0177313	0.00280597	20	38	0.0059403
63443_4	213	24weeks	Black.Hood	Nick	2	Leah	Leah	Nick	2	NA	NA	18	304	5.25	0.0163043	73	9172.5	0.00329193	1.144	181.208	0.00335404	NA	0.0034472	0.520359	5.42	0.0168323	0.00363354	19	37	0.00698758
63444_3	219	24weeks	Brown.Hood	Nick	3	Leah	Leah	Nick	3	NA	NA	22	344	5.58	0.0152459	70	10102.5	0.00377049	1.381	273.142	0.00311475	NA	0.00289617	0.503704	6.5	0.0177596	0.00297814	21	38.5	0.0060929
63444_4	219	24weeks	Brown.Hood	Nick	4	Leah	Leah	Nick	4	NA	NA	39	355	7.29	0.0185025	72	8655	0.00360406	0.986	239.49	0.00266497	NA	0.00180203	0.540187	7.47	0.0189594	0.00271574	21	38	0.00538071
63451_3	217	24weeks	Brown	Nick	1	Leah	Leah	Nick	1	NA	NA	33	354	5.45	0.0140827	76	9667.5	0.00289406	0.698	184.643	0.00299742	74244	0.00211886	0.579821	6.5	0.0167959	0.00335917	21	38	0.00635659
63451_4	217	24weeks	Brown.Hood	Nick	2	Leah	Leah	Nick	2	NA	NA	30	335	4.83	0.0132329	75	9735	0.0030137	0.433	130.673	0.00309589	50752	0.00342466	0.661573	5.48	0.0150137	0.0029589	20	38.5	0.00605479
63453_3	224	24weeks	Black	Nick	9	Leah	Leah	Nick	9	NA	NA	19	271	3.39	0.0116897	77	7815	0.00341379	1.622	257.798	0.00313793	NA	0.00231034	0.476976	4.71	0.0162414	0.00365517	20	37	0.0067931
63453_4	224	24weeks	Albino	Nick	10	Leah	Leah	Nick	10	NA	NA	13	282	3.17	0.0107458	76	8527.5	0.00369492	1.414	272.025	0.00328814	NA	0.00308475	0.492305	3.71	0.0125763	0.00325424	19	35.5	0.00654237
63456_3	233	24weeks	Albino	Nick	5	Leah	Leah	Nick	5	NA	NA	46	368	10.52	0.0254106	84	12652.5	0.00357488	3.278	619.47	0.00335749	92044	0.00217391	0.409855	10.39	0.0250966	0.0034058	23	41	0.00676329
63456_4	233	24weeks	Brown	Nick	6	Leah	Leah	Nick	6	NA	NA	51	360	10.49	0.0255231	81	10357.5	0.00328467	1.71	251.977	0.00309002	88471	0.00206813	0.466967	7.74	0.0188321	0.00304136	21	40	0.00613139
63460_3	246	24weeks	Albino	Nick	3	Leah	Leah	Nick	3	NA	NA	22	289	4.41	0.0141801	84	8610	0.00324759	0.432	134.273	0.00315113	82308	0.00250804	0.641123	3.52	0.0113183	0.0033119	20	37.5	0.00646302
63460_4	246	24weeks	Albino	Nick	4	Leah	Leah	Nick	4	NA	NA	25	335	5.63	0.0156389	70	9315	0.00419444	0.853	150.12	0.00313889	55053	0.00316667	0.563048	5.34	0.0148333	0.00325	20	37	0.00638889
63461_3	252	24weeks	Black	Nick	7	Leah	Leah	Nick	7	NA	NA	32	350	6.8	0.017801	74	9367.5	0.00327225	1.012	285.923	0.00301047	81851	0.00175393	0.533501	7.02	0.018377	0.00316754	20	38	0.00617801
63461_4	252	24weeks	Black.Hood	Nick	8	Leah	Leah	Nick	8	NA	NA	52	411	8.72	0.0188337	83	11317.5	0.00321814	1.412	272.017	0.00272138	73983	0.0024838	0.483346	10.44	0.0225486	0.00304536	24	42	0.00576674
63463_3	212	24weeks	Black.Hood	Nick	1	Leah	Leah	Nick	1	NA	NA	50	320	6.98	0.0188649	90	11955	0.00262162	0.927	324.345	0.003	54017	0.00316216	0.520475	6.06	0.0163784	0.00302703	21	39	0.00602703
63463_4	212	24weeks	Black.Hood	Nick	2	Leah	Leah	Nick	2	NA	NA	27	265	7.18	0.024589	86	12292.5	0.0035274	1.018	248.588	0.00321918	81569	0.00349315	0.514868	4.85	0.0166096	0.00304795	19	35.5	0.00626712
63465_3	216	24weeks	Brown	Nick	9	Leah	Leah	Nick	9	NA	NA	-31	373	5.49	0.0160526	83	11092.5	0.00324561	1.732	384.788	0.00289474	60256	0.0022807	0.463472	6.62	0.0193567	0.00289474	21	38	0.00578947
63465_4	216	24weeks	Brown.Hood	Nick	10	Leah	Leah	Nick	10	NA	NA	-59	328	2.27	0.00843866	78	8280	0.00349442	0.98	207.127	0.00342007	108211	0.00141264	0.530977	1.85	0.00687732	0.0033829	20	37.5	0.00680297
63468_3	223	24weeks	Black.Hood	Nick	7	Leah	Leah	Nick	7	NA	NA	51	351	4.77	0.0118657	78	10552.5	0.00323383	0.87	173.752	0.00310945	52756	0.00223881	0.545967	7.02	0.0174627	0.0029602	21	39	0.00606965
63468_4	223	24weeks	Black.Hood	Nick	8	Leah	Leah	Nick	8	NA	NA	38	362	4.74	0.01185	75	11662.5	0.003475	0.677	59.31	0.0031	50735	0.002925	0.586287	6.07	0.015175	0.0032	22	39	0.0063
63469_3	226	24weeks	Brown	Nick	3	Leah	Leah	Nick	3	NA	NA	46	300	3.61	0.0104335	86	9427.5	0.00320809	0.914	203.1	0.00315029	56198	0.00291908	0.527581	4.76	0.0137572	0.00320809	21	37	0.00635838
63471_4	239	24weeks	Black	Nick	6	Leah	Leah	Nick	6	NA	NA	13	404	19.19	0.0460192	76	12037.5	0.0041247	1.014	241.298	0.0035012	71333	0.00215827	0.529983	9.08	0.0217746	0.00326139	23	42	0.00676259
63475_3	255	24weeks	Albino	Nick	11	Leah	Leah	Nick	11	NA	NA	21	282	3.57	0.0117822	82	10095	0.0029703	0.877	180.053	0.00330033	75100	0.00264026	0.538557	4.37	0.0144224	0.00313531	20	36	0.00643564
63475_4	255	24weeks	Brown.Hood	Nick	12	Leah	Leah	Nick	12	NA	NA	43	302	3.02	0.00875362	81	10627.5	0.00278261	0.983	NA	0.00304348	83868	0.00263768	0.526028	5.73	0.0166087	0.00315942	20	36	0.0062029
63478_3	225	24weeks	Black	Nick	1	Leah	Leah	Nick	1	NA	NA	38	334	4.04	0.0108602	75	8827.5	0.00282258	NA	NA	0.00276882	NA	0.00266129	NA	4.98	0.0133871	0.00290323	20	39	0.00567204
63478_4	225	24weeks	Black	Nick	2	Leah	Leah	Nick	2	NA	NA	34	322	5.24	0.0147191	77	8482.5	0.00342697	NA	NA	0.00297753	NA	0.00191011	NA	6.72	0.0188764	0.00317416	21	39	0.00615169
63478_5	225	24weeks	Black	Nick	3	Leah	Leah	Nick	3	NA	NA	28	300	3.93	0.0119817	76	8460	0.00317073	NA	NA	0.00310976	NA	0.00289634	NA	5.83	0.0177744	0.00295732	20	37	0.00606707
63483_3	231	24weeks	Albino	Nick	1	Leah	Leah	Katie	1	NA	NA	18	270	4.15	0.0144097	74	10822.5	0.00336806	0.262	NA	0.00315972	NA	0.00236111	0.776679	4.42	0.0153472	0.00340278	19	37	0.0065625
63483_4	231	24weeks	Brown.Hood	Nick	2	Leah	Leah	Katie	2	NA	NA	16	293	4.52	0.0146278	75	10410	0.0031068	0.467	127.635	0.00385113	NA	0.00275081	0.64751	2.59	0.00838188	0.00349515	19	37.5	0.00734628
63484_3	240	24weeks	Black.Hood	Nick	3	Leah	Leah	Katie	3	NA	NA	31	363	5.34	0.0135533	76	10620	0.00261421	0.724	186.157	0.00324873	NA	0.0019797	0.57453	8.36	0.0212183	0.00307107	22	41	0.0063198
63484_4	240	24weeks	Brown.Hood	Nick	4	Leah	Leah	Katie	4	NA	NA	22	355	4.27	0.0113263	81	12090	0.0030504	0.7	136.222	0.00318302	NA	0.00222812	0.570261	6.94	0.0184085	0.00344828	21	39	0.0066313
63491_3	220	24weeks	Black.Hood	Nick	11	Leah	Leah	Katie	11	NA	NA	32	347	5.8	0.0153034	73	10882.5	0.0030343	0.344	162.968	0.00316623	NA	0.00269129	0.714346	19.19	0.0506332	0.00311346	23	41.5	0.00627968
63491_4	220	24weeks	Brown.Hood	Nick	12	Leah	Leah	Katie	12	NA	NA	46	341	6.65	0.0171835	80	9510	0.00452196	0.397	137.46	0.00294574	NA	NA	0.665832	6.41	0.0165633	0.00346253	21	39	0.00640827
63493_3	227	24weeks	Brown.Hood	Nick	9	Leah	Leah	Katie	9	NA	NA	22	310	5.31	0.015994	70	7215	0.00322289	0.661	75.3825	0.00361446	NA	0.00237952	0.600493	4.46	0.0134337	0.0039759	19	38	0.00759036
63493_4	227	24weeks	Brown	Nick	10	Leah	Leah	Katie	10	NA	NA	33	397	9.41	0.0218837	85	8452.5	0.00274419	2.029	274.928	0.00337209	NA	0.00174419	0.447087	7.35	0.017093	0.00325581	23	43	0.00662791
63497_3	241	24weeks	Brown	Nick	7	Leah	Leah	Katie	7	NA	NA	20	285	4.56	0.0149508	83	10830	0.00295082	0.404	50.94	0.00347541	NA	0.00291803	0.65554	6.09	0.0199672	0.00344262	20	38	0.00691803
63497_4	241	24weeks	Brown.Hood	Nick	8	Leah	Leah	Katie	8	NA	NA	35	282	2.41	0.00760252	78	9180	0.00246057	0.629	101.528	0.00305994	NA	0.0014511	0.591455	5.03	0.0158675	0.00315457	21	39.5	0.00621451
63498_3	246	24weeks	Albino	Nick	5	Leah	Leah	Katie	5	NA	NA	22	448	9.55	0.0203191	76	10890	0.00319149	1.087	246.292	0.00321277	NA	0.00148936	0.521637	9.74	0.0207234	0.00338298	22	42	0.00659574
63498_4	246	24weeks	Albino	Nick	6	Leah	Leah	Katie	6	NA	NA	26	402	5.52	0.0128972	82	10380	0.00336449	0.334	98.1525	0.00371495	NA	0.00226636	0.695623	5.51	0.0128738	0.00376168	23	43	0.00747664
63589_1	262	24weeks	Black	Nick	3	Katie	Katie	Katie	3	NA	NA	37	318	3.2	0.00901408	83	10650	0.00270423	0.907	247.38	0.00321127	92449	0.00276056	0.532854	5.36	0.0150986	0.0031831	20.5	40	0.00639437
63589_2	262	24weeks	Black.Hood	Nick	4	Katie	Katie	Katie	4	NA	NA	21	377	8.45	0.0212312	84	12210	0.00266332	0.728	407.632	0.00351759	119455	0.00221106	0.559782	7.13	0.0179146	0.00351759	22	42	0.00703518
63607_1	288	24weeks	Albino	Nick	7	Katie	Katie	Katie	7	NA	NA	28	310	3.21	0.00949704	81	9315	0.00281065	2.017	418.582	0.00331361	NA	0.00251479	0.451836	4.32	0.0127811	0.00346154	21	39	0.00677515
63607_2	288	24weeks	Black	Nick	8	Katie	Katie	Katie	8	NA	NA	42	340	4.29	0.0112304	80	11010	0.00290576	1.561	360.585	0.00316754	NA	0.00274869	0.476987	5.61	0.0146859	0.00332461	22	41	0.00649215
63658_1	279	24weeks	Albino	Jaime	3	Katie	Katie	Katie	3	NA	NA	20	300	5.84	0.01825	91	10822.5	0.0026875	2.519	290.783	0.003125	NA	0.00259375	0.42368	3.49	0.0109062	0.00325	21	39	0.006375
63658_2	279	24weeks	Brown.Hood	Jaime	4	Katie	Katie	Katie	4	NA	NA	14	276	3.58	0.0123448	94	11902.5	0.003	1.861	290.663	0.00331034	NA	0.00210345	0.445856	2.79	0.00962069	0.00341379	21	38	0.00672414
63659_1	286	24weeks	Brown.Hood	Jaime	1	Katie	Katie	Katie	1	NA	NA	31	335	5.23	0.0142896	77	11355	0.00314208	1.425	254.235	0.00314208	NA	0.0020765	0.490123	8.1	0.0221311	0.00349727	20	39	0.00663934
63659_2	286	24weeks	Brown.Hood	Jaime	2	Katie	Katie	Katie	2	NA	NA	68	435	14.49	0.0288072	78	11857.5	0.00276342	1.415	508.777	0.00324056	NA	0.00139165	0.489512	15.31	0.0304374	0.00322068	24	44	0.00646123
63663_1	296	24weeks	Black.Hood	Jaime	7	Katie	Katie	Katie	7	NA	NA	-45	377	4.01	0.0120783	83	9390	0.00361446	1.83	330.36	0.00328313	NA	0.00192771	0.458394	4.06	0.0122289	0.00370482	19	39	0.00698795
63663_2	296	24weeks	Black.Hood	Jaime	8	Katie	Katie	Katie	8	NA	NA	84	306	6.6	0.0169231	83	10500	0.00346154	1.117	258.908	0.00333333	NA	0.00287179	0.508354	6.69	0.0171538	0.00317949	21	40	0.00651282
63665_1	260	24weeks	Black.Hood	Jaime	9	Katie	Katie	Katie	9	NA	NA	23	310	5.9	0.0177177	83	9742.5	0.00273273	1.502	302.73	0.0033033	NA	0.00258258	0.477157	4.41	0.0132432	0.00324324	21	39	0.00654655
63665_2	260	24weeks	Black.Hood	Jaime	10	Katie	Katie	Katie	10	NA	NA	17	314	4.8	0.0145015	72	8992.5	0.00314199	0.716	198.675	0.00347432	NA	0.00208459	0.584028	5.48	0.0165559	0.00359517	20	40	0.00706949
63665_3	260	24weeks	Black.Hood	Jaime	11	Katie	Katie	Katie	11	NA	NA	21	348	6.21	0.0168293	73	8925	0.00273713	2.322	409.913	0.00349593	NA	0.00238482	0.448594	5.31	0.0143902	0.00338753	22	40	0.00688347
63665_4	260	24weeks	Black.Hood	Jaime	12	Katie	Katie	Katie	12	NA	NA	20	335	5.19	0.0146197	80	11002.5	0.00270423	1.572	345.3	0.00394366	NA	0.002	0.476294	4.18	0.0117746	0.00380282	21	40	0.00774648
63666_1	261	24weeks	Black.Hood	Jaime	1	Katie	Katie	Katie	1	NA	NA	35	300	3.69	0.0110149	78	8632.5	0.00313433	0.9	165.705	0.00370149	88727	0.00295522	0.541613	4.37	0.0130448	0.00319403	22	40	0.00689552
63666_2	261	24weeks	Brown.Hood	Jaime	2	Katie	Katie	Katie	2	NA	NA	16	296	4.1	0.013141	71	9240	0.00314103	0.533	185.535	0.0025	77980	0.00323718	0.633719	3.4	0.0108974	0.00278846	20	39	0.00528846
63666_3	261	24weeks	Brown.Hood	Jaime	3	Katie	Katie	Katie	3	NA	NA	3	253	3.13	0.0122266	66	9247.5	0.00367187	0.892	208.988	0.00285156	120114	0.00273437	0.565001	3.33	0.0130078	0.00347656	20	36	0.00632813
63666_4	261	24weeks	Brown.Hood	Jaime	4	Katie	Katie	Katie	4	NA	NA	23	220	1.5	0.00617284	75	8355	0.00304527	0.481	128.903	0.00312757	87831	0.00292181	0.642176	1.73	0.00711934	0.00320988	19	37	0.00633745
63667_1	263	24weeks	Brown	Jaime	5	Katie	Katie	Katie	5	NA	NA	45	364	7.73	0.0188998	77	10425	0.00283619	0.919	245.812	0.00315403	91429	0.00239609	0.540597	7.8	0.0190709	0.00310513	20	39	0.00625917
63667_2	263	24weeks	Albino	Jaime	6	Katie	Katie	Katie	6	NA	NA	44	413	9.92	0.0217068	81	10350	0.00260394	1.274	298.567	0.00291028	90240	0.00218818	0.49661	11.69	0.0255799	0.00295405	21	40.5	0.00586433
63667_3	263	24weeks	Brown	Jaime	7	Katie	Katie	Katie	7	NA	NA	52	405	11.75	0.0257112	85	11107.5	0.00245077	0.766	255.75	0.00249453	109798	0.00238512	0.551375	14.9	0.0326039	0.00275711	21	41	0.00525164
63668_1	266	24weeks	Brown.Hood	Jaime	8	Katie	Katie	Katie	8	NA	NA	33	367	5.79	0.014475	80	8962.5	0.002975	0.592	238.65	0.002925	80675	0.002075	0.596868	7.22	0.01805	0.002925	22	39	0.00585
63669_1	268	24weeks	Black.Hood	Jaime	5	Katie	Katie	Katie	5	NA	NA	43	372	8.01	0.0193012	86	9712.5	0.0026747	2.12	489.983	0.00298795	NA	0.00219277	0.442315	9.61	0.0231566	0.00279518	23	42	0.00578313
63669_2	268	24weeks	Brown.Hood	Jaime	6	Katie	Katie	Katie	6	NA	NA	41	389	5.81	0.0135116	79	10995	0.00274419	1.128	319.462	0.00286047	NA	0.00244186	0.512837	7.77	0.0180698	0.00283721	21	40	0.00569767
63671_1	277	24weeks	Black	Jaime	9	Katie	Katie	Katie	9	NA	NA	20	331	6.49	0.01849	78	9262.5	0.00276353	1.588	231.165	0.00347578	118392	0.00276353	0.477796	3.95	0.0112536	0.00353276	20	40	0.00700855
63671_2	277	24weeks	Black.Hood	Jaime	10	Katie	Katie	Katie	10	NA	NA	18	300	4.31	0.0135535	87	11010	0.00289308	1.189	204.113	0.00358491	73018	0.00345912	0.496352	3.48	0.0109434	0.00355346	20	37	0.00713836
63677_1	270	24weeks	Black.Hood	Nick	1	Katie	Katie	Katie	1	NA	NA	29	291	4.64	0.0145	89	11887.5	0.00309375	1.122	268.905	0.0029375	136527	0.00284375	0.500154	4.51	0.0140938	0.00321875	19	37	0.00615625
63677_2	270	24weeks	Black.Hood	Nick	2	Katie	Katie	Katie	2	NA	NA	38	310	6.83	0.0196264	87	12585	0.00310345	1.219	494.783	0.00310345	185864	0.00252874	0.4937	5.2	0.0149425	0.00313218	19	39	0.00623563
63677_4	270	24weeks	Black.Hood	Nick	4	Katie	Katie	Katie	4	NA	NA	23	280	4.42	0.0145875	79	15855	0.00356436	1.953	251.993	0.00313531	75458	0.00316832	0.45697	4.03	0.0133003	0.00330033	20	38	0.00643564
63678_1	272	24weeks	Brown	Jaime	11	Katie	Katie	Katie	11	NA	NA	25	278	3.76	0.0124092	76	9345	0.00283828	1.332	210.54	0.00330033	60336	0.00353135	0.498674	3.65	0.0120462	0.00359736	20	37	0.00689769
63678_2	272	24weeks	Brown.Hood	Jaime	12	Katie	Katie	Katie	12	NA	NA	37	315	6.65	0.018892	77	10080	0.00306818	1.751	535.47	0.00323864	139160	0.00284091	0.469533	8.1	0.0230114	0.00335227	19	36	0.00659091
63680_1	293	24weeks	Black.Hood	Nick	5	Katie	Katie	Katie	5	NA	NA	15	313	3.75	0.0114329	73	10470	0.00341463	0.581	128.167	0.00371951	96172	0.00283537	0.61444	2.62	0.0079878	0.00353659	19	40	0.0072561
63680_2	293	24weeks	Black.Hood	Nick	6	Katie	Katie	Katie	6	NA	NA	22	287	3.77	0.0122006	82	8940	0.0038835	0.887	163.02	0.00320388	125714	0.00226537	0.537133	4.16	0.0134628	0.00320388	20	38.5	0.00640777
63680_3	293	24weeks	Black.Hood	Nick	7	Katie	Katie	Katie	7	NA	NA	15	293	3.39	0.0110065	73	9967.5	0.00327922	0.753	119.43	0.00337662	97910	0.00217532	0.574674	3.54	0.0114935	0.00301948	19	38	0.0063961
63680_4	293	24weeks	Black.Hood	Nick	8	Katie	Katie	Katie	8	NA	NA	24	317	4.8	0.0140762	74	11152.5	0.00378299	0.884	213.33	0.00331378	117793	0.00170088	0.550757	3.92	0.0114956	0.00328446	20	41	0.00659824
63682_1	265	24weeks	Brown.Hood	Nick	1	Katie	Katie	Katie	1	NA	NA	22	340	5.53	0.0152762	78	14190	0.00383978	2.403	458.033	0.00331492	108400	0.00303867	0.439977	8.43	0.0232873	0.0030663	21	38	0.00638122
63682_2	265	24weeks	Brown.Hood	Nick	2	Katie	Katie	Katie	2	NA	NA	15	345	5.64	0.0156667	76	12210	0.00380556	1.286	404.243	0.00397222	106772	0.00316667	0.502499	6.09	0.0169167	0.00397222	21	39.5	0.00794444
63683_1	269	24weeks	Black.Hood	Nick	3	Katie	Katie	Katie	3	NA	NA	44	331	6.88	0.0183467	82	11107.5	0.00290667	1.277	280.845	0.00325333	114680	0.00266667	0.495048	5.71	0.0152267	0.00328	21	38	0.00653333
63683_2	269	24weeks	Black.Hood	Nick	4	Katie	Katie	Katie	4	NA	NA	12	346	5.35	0.0149441	77	10470	0.00276536	1.335	300.72	0.00324022	119614	0.00231844	0.497025	6.52	0.0182123	0.00315642	19	36	0.00639665
63686_1	275	24weeks	Brown	Nick	5	Katie	Katie	Katie	5	NA	NA	41	355	8.59	0.0216919	76	12900	0.00280303	4.74	738.945	0.00285354	157348	0.00224747	0.391146	6.38	0.0161111	0.0030303	21	40	0.00588384
63686_2	275	24weeks	Brown	Nick	6	Katie	Katie	Katie	6	NA	NA	33	327	8.23	0.0228611	70	9022.5	0.00272222	2.226	451.65	0.00302778	170349	0.00175	0.456075	5.56	0.0154444	0.00319444	20	39	0.00622222
63688_1	284	24weeks	Brown.Hood	Nick	9	Katie	Katie	Katie	9	NA	NA	90	295	6.8	0.0176623	85	9697.5	0.00309091	1.604	303.308	0.00311688	232788	0.00171429	0.468467	19.17	0.0497922	0.00319481	21	40	0.00631169
63688_2	284	24weeks	Brown.Hood	Nick	10	Katie	Katie	Katie	10	NA	NA	-32	352	4	0.0125	91	9952.5	0.00303125	1.804	249.255	0.00309375	125947	0.002375	0.451411	4.34	0.0135625	0.0031875	19	38	0.00628125
63689_1	285	24weeks	Brown	Nick	11	Katie	Katie	Katie	11	NA	NA	25	309	5.52	0.0165269	72	8625	0.00281437	0.871	156.442	0.00353293	103105	0.00227545	0.556374	5.12	0.0153293	0.00347305	21	40	0.00700599
63689_2	285	24weeks	Albino	Nick	12	Katie	Katie	Katie	12	NA	NA	17	323	3.93	0.0115588	71	10942.5	0.00332353	1.241	227.347	0.00364706	84040	0.00294118	0.514131	5.74	0.0168824	0.0035	20	39	0.00714706
63695_1	259	24weeks	Albino	Nick	11	Katie	Katie	Katie	11	NA	NA	24	324	8.71	0.0250287	80	10237.5	0.00287356	1.322	327.533	0.00301724	252541	0.00212644	0.493993	5.14	0.0147701	0.0033046	19	38	0.00632184
63695_2	259	24weeks	Brown.Hood	Nick	12	Katie	Katie	Katie	12	NA	NA	40	326	9.23	0.0252186	81	9607.5	0.00243169	1.833	349.98	0.00355191	186430	0.00215847	0.46048	5.98	0.0163388	0.00327869	20	40	0.0068306
63712_1	277	24weeks	Brown	Nick	3	Katie	Katie	Katie	3	NA	NA	19	265	4.89	0.0172183	87	11685	0.00285211	2.044	358.132	0.0034507	NA	0.00264085	0.444444	3.12	0.0109859	0.00352113	19	36	0.00697183
63712_2	277	24weeks	Brown.Hood	Nick	4	Katie	Katie	Katie	4	NA	NA	11	295	4.48	0.0146405	90	10537.5	0.00323529	1.326	274.837	0.00388889	NA	0.0020915	0.481513	2.9	0.00947712	0.00352941	20	38	0.0074183
63715_1	264	24weeks	Albino	Nick	1	Katie	Katie	Katie	1	NA	NA	29	365	4.52	0.0114721	73	10012.5	0.00467005	1.998	421.688	0.00312183	NA	0.00220812	0.462125	6.81	0.0172843	0.0030203	20	38.5	0.00614213
63715_2	264	24weeks	Brown	Nick	2	Katie	Katie	Katie	2	NA	NA	30	332	5.21	0.0143923	84	11790	0.0029558	1.877	361.298	0.00314917	NA	0.00383978	0.455012	5.9	0.0162983	0.00290055	19	37	0.00604972
63717_1	258	24weeks	Albino	Nick	7	Katie	Katie	Katie	7	NA	NA	10	360	6.56	0.0177297	73	11827.5	0.0027027	0.847	340.627	0.00386486	133867	0.00202703	0.558283	4.9	0.0132432	0.00364865	22	42	0.00751351
63717_2	258	24weeks	Albino	Nick	8	Katie	Katie	Katie	8	NA	NA	24	322	6.09	0.0176012	84	10080	0.00317919	1.301	457.673	0.0032659	124832	0.00291908	0.490543	4.13	0.0119364	0.00297688	22	40	0.00624277
63718_1	261	24weeks	Black.Hood	Nick	5	Katie	Katie	Katie	5	NA	NA	19	278	3.18	0.0107071	67	9427.5	0.00343434	1.137	223.8	0.00373737	NA	0.00228956	0.531396	2.99	0.0100673	0.00350168	19	38	0.00723906
63718_2	261	24weeks	Black.Hood	Nick	6	Katie	Katie	Katie	6	NA	NA	22	337	4.67	0.0130084	72	9427.5	0.00278552	0.956	265.387	0.0032312	NA	0.00247911	0.544132	6.08	0.0169359	0.00337047	20	39	0.00660167
63719_1	263	24weeks	Albino	Nick	9	Katie	Katie	Katie	9	NA	NA	41	363	9.62	0.0238119	74	9052.5	0.00240099	3.292	376.777	0.00269802	NA	0.00225248	0.41899	8.66	0.0214356	0.0029703	22	41	0.00566832
63719_2	263	24weeks	Brown.Hood	Nick	10	Katie	Katie	Katie	10	NA	NA	54	290	4.82	0.0140116	78	8122.5	0.00267442	1.975	295.935	0.00287791	NA	0.00180233	0.457109	5.55	0.0161337	0.00313953	21	39	0.00601744
63722_1	276	24weeks	Black	Nick	11	Katie	Katie	Katie	11	NA	NA	22	343	8	0.0219178	84	12367.5	0.00309589	3.585	489.697	0.00312329	NA	0.00238356	0.403426	6.21	0.0170137	0.00347945	20	38.5	0.00660274
63723_1	284	24weeks	Brown.Hood	Nick	1	Katie	Katie	Katie	1	NA	NA	27	324	4.8	0.0136752	89	11122.5	0.00304843	0.531	245.73	0.00287749	122448	0.00190883	0.597199	6.02	0.017151	0.00301994	20	39	0.00589744
63723_2	284	24weeks	Black.Hood	Nick	2	Katie	Katie	Katie	2	NA	NA	21	302	4.83	0.0149536	85	9660	0.00334365	0.854	125.265	0.00294118	134203	0.00213622	0.537381	5.66	0.0175232	0.00306502	20.5	39.5	0.00600619
63724_1	290	24weeks	Albino	Nick	5	Katie	Katie	Katie	5	NA	NA	33	326	5.38	0.0149861	72	8377.5	0.00328691	0.745	103.567	0.00292479	97486	0.00292479	0.578206	4.77	0.0132869	0.00295265	22	38	0.00587744
63724_2	290	24weeks	Brown.Hood	Nick	6	Katie	Katie	Katie	6	NA	NA	44	378	8.49	0.0201185	77	10177.5	0.00303318	0.689	247.14	0.00270142	173037	0.00191943	0.579808	8.02	0.0190047	0.00279621	22	39	0.00549763
63727_1	271	24weeks	Black.Hood	Nick	9	Katie	Katie	Katie	9	NA	NA	20	325	6.6	0.0191304	83	8745	0.00278261	1.97	287.332	0.00408696	136412	0.00197101	0.451764	5.57	0.0161449	0.00373913	20	38.5	0.00782609
63727_2	271	24weeks	Black.Hood	Nick	10	Katie	Katie	Katie	10	NA	NA	23	315	4.96	0.0146746	80	8692.5	0.00289941	3.038	407.265	0.00366864	124950	0.00236686	0.419168	5.89	0.017426	0.00402367	19	35	0.00769231
63734_1	269	24weeks	Albino	Katie	1	Leah	Leah	Katie	1	NA	NA	20	350	4.73	0.0127838	90	10275	0.00321622	NA	NA	0.00308108	NA	0.00259459	NA	5.34	0.0144324	0.00310811	21	39	0.00618919
63734_2	269	24weeks	Black.Hood	Katie	2	Leah	Leah	Katie	2	NA	NA	22	333	3.79	0.0106761	85	10575	0.00278873	NA	NA	0.00340845	NA	0.00408451	NA	4.51	0.0127042	0.00321127	20	39	0.00661972
63736_1	275	24weeks	Albino	Katie	3	Leah	Leah	Katie	3	NA	NA	17	362	7.31	0.0192876	80	8760	0.00266491	NA	NA	0.00319261	NA	0.00245383	NA	5.26	0.0138786	0.00327177	20	38.5	0.00646438
63736_2	275	24weeks	Brown	Katie	4	Leah	Leah	Katie	4	NA	NA	-11	381	9.45	0.0255405	81	8595	0.00240541	NA	NA	0.00308108	NA	0.00202703	NA	6.14	0.0165946	0.00283784	22	39	0.00591892
63741_1	268	24weeks	Brown.Hood	Katie	7	Leah	Leah	Katie	7	NA	NA	34	390	5.87	0.0138443	90	10042.5	0.00313679	NA	NA	0.00301887	NA	0.00207547	NA	7.04	0.0166038	0.00311321	20.5	39	0.00613208
63741_2	268	24weeks	Black.Hood	Katie	8	Leah	Leah	Katie	8	NA	NA	46	415	6.27	0.0136009	80	11407.5	0.00427332	NA	NA	0.00312364	NA	0.00266811	NA	9.86	0.0213883	0.00316703	23	42	0.00629067
63742_1	291	24weeks	Albino	Katie	9	Leah	Leah	Katie	9	NA	NA	23	337	4.78	0.0132778	74	9247.5	0.00291667	NA	NA	0.00305556	NA	0.00277778	NA	5.16	0.0143333	0.00336111	29	34	0.00641667
63742_2	291	24weeks	Black.Hood	Katie	10	Leah	Leah	Katie	10	NA	NA	32	341	4.82	0.0129223	71	9442.5	0.00294906	NA	NA	0.00294906	NA	0.00252011	NA	5.09	0.0136461	0.00308311	23	39	0.00603217
63743_1	285	24weeks	Albino	Nick	11	Katie	Katie	Katie	11	NA	NA	7	310	4.06	0.0128076	78	13080	0.00315457	2.489	418.89	0.0029653	123300	0.00252366	0.43704	5.22	0.0164669	0.00347003	20	39	0.00643533
63743_2	285	24weeks	Brown	Nick	12	Katie	Katie	Katie	12	NA	NA	17	283	2.21	0.00736667	79	10567.5	0.00286667	1.812	295.447	0.0034	117951	0.00273333	0.463868	2.99	0.00996667	0.0035	20	38	0.0069
63745_1	267	24weeks	Black	Katie	11	Leah	Leah	Katie	11	NA	NA	37	320	7.27	0.0203641	84	8190	0.00280112	NA	NA	0.00310924	NA	0.00207283	NA	5.66	0.0158543	0.00308123	21	38	0.00619048
63745_2	267	24weeks	Black.Hood	Katie	12	Leah	Leah	Katie	12	NA	NA	31	332	5.58	0.0153719	79	8910	0.0030303	NA	NA	0.00294766	NA	0.00239669	NA	5.01	0.0138017	0.00305785	21	39	0.00600551
63749_1	281	24weeks	Brown	Katie	3	Leah	Leah	Katie	3	NA	NA	26	255	2.61	0.00928826	80	10950	0.00348754	1.574	228.067	0.00512456	77682	0.00313167	0.476169	4	0.0142349	NA	19	35.5	NA
63749_2	281	24weeks	Brown	Katie	4	Leah	Leah	Katie	4	NA	NA	12	260	3.09	0.0113603	79	11550	0.00378676	1.394	834.66	0.00349265	63765	0.003125	0.489742	3.15	0.0115809	0.00341912	19	37	0.00691176
63751_1	272	24weeks	Black	Katie	1	Leah	Leah	Katie	1	NA	NA	11	346	5.52	0.0154622	75	9240	0.00296919	2.296	285.975	0.00327731	142222	0.00277311	0.447221	7.43	0.0208123	0.00327731	20	39	0.00655462
63751_2	272	24weeks	Brown.Hood	Katie	2	Leah	Leah	Katie	2	NA	NA	30	308	4.68	0.0138462	79	9375	0.00310651	2.31	428.07	0.0033432	129867	0.00221893	0.442235	6.53	0.0193195	0.00346154	20.5	37.5	0.00680473
63752_1	266	24weeks	Brown.Hood	Katie	5	Leah	Leah	Katie	5	NA	NA	53	311	4.7	0.0129121	86	11602.5	0.00299451	0.683	228.345	0.00288462	70000	0.00175824	0.565317	6.6	0.0181319	0.00285714	20	37.5	0.00574176
63752_2	266	24weeks	Black.Hood	Katie	6	Leah	Leah	Katie	6	NA	NA	34	304	3.7	0.0109467	83	10552.5	0.00343195	1.207	221.955	0.00275148	72731	0.00307692	0.499804	5.56	0.0164497	0.00307692	18.5	36	0.0058284
63753_1	283	24weeks	Black.Hood	Katie	9	Leah	Leah	Katie	9	NA	NA	30	345	7.46	0.0198933	79	9615	0.00328	2.02	298.658	0.00290667	161349	0.00221333	0.453931	7.2	0.0192	0.00293333	20	38	0.00584
63753_2	283	24weeks	Brown.Hood	Katie	10	Leah	Leah	Katie	10	NA	NA	47	380	11.79	0.0276112	82	10080	0.00295082	1.711	364.095	0.00248244	276839	0.00145199	0.465752	11.12	0.0260422	0.00269321	22	40	0.00517564
63754_1	265	24weeks	Brown.Hood	Katie	7	Leah	Leah	Katie	7	NA	NA	32	275	3.24	0.0105537	75	9105	0.00693811	1.026	190.762	0.00312704	90882	0.00221498	0.530164	4.81	0.0156678	0.00345277	19	37	0.0065798
63754_2	265	24weeks	Brown.Hood	Katie	8	Leah	Leah	Katie	8	NA	NA	26	389	7.86	0.0189398	91	14272.5	0.00344578	2.131	335.062	0.00327711	100341	0.0019759	0.437135	12.47	0.0300482	0.0033012	20	39	0.00657831
63757_1	253	24weeks	Black.Hood	Katie	13	Leah	Leah	Katie	11	NA	NA	26	331	5	0.0140056	83	10447.5	0.00280112	NA	NA	0.0035014	NA	0.00235294	NA	4.56	0.0127731	0.00294118	21	39	0.00644258
63757_2	253	24weeks	Black.Hood	Katie	12	Leah	Leah	Katie	12	NA	NA	27	387	5.56	0.01343	83	9390	0.00256039	1.132	212.415	0.00342995	114902	0.00246377	0.506862	6.41	0.0154831	0.00318841	22	41	0.00661836
63759_1	288	24weeks	Black	Katie	1	Leah	Leah	Katie	1	NA	NA	22	320	3.08	0.00900585	84	10237.5	0.00289474	NA	NA	0.00318713	NA	0.00292398	NA	5.08	0.0148538	0.00350877	22	41	0.00669591
63759_2	288	24weeks	Brown	Katie	2	Leah	Leah	Katie	2	NA	NA	37	342	4.59	0.0121108	79	10350	0.00258575	NA	NA	0.00277045	NA	0.00248021	NA	4.85	0.0127968	0.00295515	22	39	0.00572559
63760_1	264	24weeks	Black	Katie	7	Leah	Leah	Katie	7	NA	NA	15	297	3.23	0.0103526	83	10635	0.00323718	NA	NA	0.00352564	NA	0.00346154	NA	3.84	0.0123077	0.00384615	20	36	0.00737179
63760_2	264	24weeks	Black	Katie	8	Leah	Leah	Katie	8	NA	NA	32	335	4.13	0.0112534	79	9165	0.00313351	NA	NA	0.00324251	NA	0.00297003	NA	5.87	0.0159946	0.00326975	20	38.5	0.00651226
63761_1	277	24weeks	Albino	Katie	3	Leah	Leah	Katie	3	NA	NA	11	290	6.28	0.0208638	99	11587.5	0.00269103	NA	NA	0.00332226	NA	0.00289037	NA	4.38	0.0145515	0.00355482	20	37	0.00687708
63761_2	277	24weeks	Brown.Hood	Katie	4	Leah	Leah	Katie	4	NA	NA	4	247	3.33	0.0132669	86	10200	0.00330677	NA	NA	0.00334661	NA	0.00318725	NA	1.39	0.00553785	0.00398406	18	34	0.00733068
63764_1	294	24weeks	Black	Katie	5	Leah	Leah	Katie	5	NA	NA	18	345	4.89	0.0134711	79	10830	0.0038292	NA	NA	0.00341598	NA	0.00305785	NA	5.55	0.0152893	0.0031405	21	40	0.00655647
63764_2	294	24weeks	Black.Hood	Katie	13	Leah	Leah	Katie	6	NA	NA	28	332	4.34	0.0120556	73	9900	0.00380556	NA	NA	0.00325	NA	0.00186111	NA	4.63	0.0128611	0.00330556	21	41	0.00655556
63765_1	295	24weeks	Black.Hood	Katie	11	Leah	Leah	Katie	11	NA	NA	11	309	5.26	0.0164375	85	9315	0.003875	NA	NA	0.003125	NA	0.0019375	NA	5.86	0.0183125	0.00315625	19	38	0.00628125
63765_2	295	24weeks	Black.Hood	Katie	12	Leah	Leah	Katie	12	NA	NA	23	336	3.61	0.0100557	76	10380	0.00306407	NA	NA	0.00325905	NA	0.00214485	NA	4.01	0.0111699	0.00334262	22	41.5	0.00660167
63766_1	298	24weeks	Brown.Hood	Katie	9	Leah	Leah	Katie	9	NA	NA	23	300	2.63	0.00814241	67	10635	0.00365325	NA	NA	0.00386997	NA	0.00343653	NA	2.14	0.00662539	0.00421053	20	37	0.0080805
63766_2	298	24weeks	Black.Hood	Katie	10	Leah	Leah	Katie	10	NA	NA	7	269	3.01	0.0109058	70	10620	0.00318841	NA	NA	0.00380435	NA	0.00278986	NA	2.96	0.0107246	0.00394928	21	37	0.00775362
63768_1	262	24weeks	Black	Katie	5	Leah	Leah	Katie	5	NA	NA	42	385	8.09	0.0189461	82	12480	0.00259953	NA	NA	0.00309133	NA	0.00245902	NA	9.05	0.0211944	0.00295082	23	42.5	0.00604215
63768_2	262	24weeks	Albino	Katie	6	Leah	Leah	Katie	6	NA	NA	50	375	9.77	0.0229882	75	11220	0.00263529	NA	NA	0.00310588	NA	0.00167059	NA	9.24	0.0217412	0.00322353	20	39	0.00632941
63769_1	263	24weeks	Brown.Hood	Katie	3	Leah	Leah	Katie	3	NA	NA	39	337	5.6	0.0148936	90	9615	0.00263298	NA	NA	0.00297872	NA	0.00231383	NA	5.29	0.0140691	0.00289894	19	39.5	0.00587766
63769_2	263	24weeks	Brown	Katie	4	Leah	Leah	Katie	4	NA	NA	51	334	8.96	0.0232727	77	8857.5	0.00293506	NA	NA	0.00314286	NA	0.00244156	NA	7.47	0.0194026	0.00353247	21	40	0.00667532
63770_1	273	24weeks	Black	Katie	7	Leah	Leah	Katie	7	NA	NA	42	355	8.34	0.0210076	76	8662.5	0.00254408	NA	NA	0.0031738	NA	0.00214106	NA	8.35	0.0210327	0.00297229	21	40.5	0.0061461
63770_2	273	24weeks	Black.Hood	Katie	8	Leah	Leah	Katie	8	NA	NA	37	299	4.53	0.0134821	81	9412.5	0.00300595	NA	NA	0.00348214	NA	0.00306548	NA	6.88	0.0204762	0.00339286	21	39	0.006875
63772_1	278	24weeks	Brown.Hood	Katie	1	Leah	Leah	Katie	1	NA	NA	26	302	3.25	0.00990854	78	10042.5	0.00289634	NA	NA	0.00304878	NA	0.00286585	NA	4.59	0.0139939	0.00310976	20	37.5	0.00615854
63772_2	278	24weeks	Brown.Hood	Katie	2	Leah	Leah	Katie	2	NA	NA	18	340	4.83	0.0134916	88	10777.5	0.0025419	NA	NA	0.00301676	NA	0.00248603	NA	6.72	0.0187709	0.00276536	20	38	0.00578212
63775_1	257	24weeks	Albino	Katie	9	Leah	Leah	Katie	9	NA	NA	30	338	4.71	0.0127989	85	10020	0.00298913	NA	NA	0.00347826	NA	0.00293478	NA	4.04	0.0109783	0.00375	20	40	0.00722826
63775_2	257	24weeks	Albino	Katie	10	Leah	Leah	Katie	10	NA	NA	18	352	4.65	0.0125676	73	9952.5	0.00305405	NA	NA	0.00321622	NA	0.0027027	NA	3.36	0.00908108	0.00332432	22	41	0.00654054
63777_1	259	24weeks	Black	Katie	11	Leah	Leah	Katie	11	NA	NA	22	323	8.83	0.0255942	90	10650	0.0024058	NA	NA	0.0037971	NA	0.00284058	NA	6.84	0.0198261	0.00347826	20.5	39	0.00727536
63777_2	259	24weeks	Black.Hood	Katie	12	Leah	Leah	Katie	12	NA	NA	35	318	10.56	0.029915	81	11985	0.00254958	NA	NA	0.00303116	NA	0.00186969	NA	6.59	0.0186686	0.0029745	21	38	0.00600567
63779_1	272	24weeks	Black.Hood	Katie	7	Leah	Leah	Katie	7	NA	NA	27	279	3.45	0.0112745	80	10410	0.00261438	1.515	197.52	0.00356209	70894	0.0030719	0.479961	3.65	0.0119281	0.00372549	19	37	0.00728758
63779_2	272	24weeks	Brown.Hood	Katie	8	Leah	Leah	Katie	8	NA	NA	36	338	6.52	0.0174332	80	9120	0.00296791	3.025	709.59	0.00347594	176933	0.00240642	0.419496	10.46	0.0279679	0.00328877	21	38	0.00676471
63780_1	280	24weeks	Black	Katie	5	Leah	Leah	Katie	5	NA	NA	31	324	8.31	0.0234085	98	12300	0.00307042	3.452	535.148	0.00261972	219027	0.00208451	0.395367	6.02	0.0169577	0.00301408	21	39	0.0056338
63780_2	280	24weeks	Albino	Katie	6	Leah	Leah	Katie	6	NA	NA	23	313	9.95	0.0296131	91	14467.5	0.00360119	3.066	488.017	0.00354167	222734	0.00235119	0.408895	8.36	0.024881	0.00363095	20	38	0.00717262
63782_1	285	24weeks	Brown	Katie	1	Leah	Leah	Katie	1	NA	NA	24	319	4.62	0.0134694	86	9637.5	0.00297376	2.748	405.315	0.00358601	118455	0.00294461	0.421316	6.4	0.0186589	0.00349854	20	39	0.00708455
63782_2	285	24weeks	Brown.Hood	Katie	2	Leah	Leah	Katie	2	NA	NA	25	323	2.49	0.00715517	88	11190	0.00321839	1.887	339.668	0.0033046	134108	0.00267241	0.450399	5.87	0.0168678	0.00347701	19	39	0.00678161
63785_1	297	24weeks	Black.Hood	Katie	3	Leah	Leah	Katie	3	NA	NA	47	371	4.92	0.0117703	91	12022.5	0.0027512	3.174	407.092	0.00313397	125952	0.00200957	0.406397	5.94	0.0142105	0.00339713	21	41	0.0065311
63791_3	260	24weeks	Black.Hood	Katie	1	Katie	Katie	Katie	1	NA	NA	18	320	4.78	0.014142	70	8812.5	0.00307692	NA	NA	0.00360947	NA	0.00210059	NA	3.84	0.0113609	0.00328402	21	41	0.00689349
63791_4	260	24weeks	Black.Hood	Katie	2	Katie	Katie	Katie	2	NA	NA	31	345	5.57	0.0148138	73	8737.5	0.00281915	NA	NA	0.0031383	NA	0.00281915	NA	4.65	0.012367	0.00321809	21	41	0.00635638
63792_3	270	24weeks	Albino	Katie	9	Katie	Katie	Katie	9	NA	NA	20	354	8.15	0.0217914	87	11902.5	0.00248663	NA	NA	0.00307487	NA	0.00245989	NA	6.94	0.0185561	0.00296791	21	39	0.00604278
63792_4	270	24weeks	Black.Hood	Katie	10	Katie	Katie	Katie	10	NA	NA	21	300	4.07	0.0126791	88	9300	0.00277259	NA	NA	0.00311526	NA	0.00271028	NA	3.71	0.0115576	0.00345794	19	37	0.00657321
63793_3	276	24weeks	Black	Katie	3	Katie	Katie	Katie	3	NA	NA	23	320	5.51	0.0160641	78	10380	0.00323615	NA	NA	0.00344023	NA	0.00326531	NA	4.44	0.0129446	0.00361516	21	40.5	0.00705539
63793_4	276	24weeks	Black.Hood	Katie	4	Katie	Katie	Katie	4	NA	NA	20	306	5.18	0.0158896	80	9375	0.00282209	NA	NA	0.00349693	NA	0.00211656	NA	4.05	0.0124233	0.00352761	20	39	0.00702454
63793_5	276	24weeks	Black	Katie	5	Katie	Katie	Katie	5	NA	NA	25	327	6.14	0.0174432	83	11272.5	0.00301136	NA	NA	0.00329545	NA	0.00284091	NA	4.71	0.0133807	0.00357955	21	39	0.006875
63793_6	276	24weeks	Black.Hood	Katie	6	Katie	Katie	Katie	6	NA	NA	20	297	5.45	0.0171924	84	10612.5	0.00290221	NA	NA	0.00384858	NA	0.00280757	NA	3.69	0.0116404	0.00397476	20	38	0.00782334
63795_3	284	24weeks	Brown.Hood	Katie	7	Katie	Katie	Katie	7	NA	NA	27	338	9.68	0.0265205	92	11220	0.00268493	NA	NA	0.00290411	NA	0.00224658	NA	9.59	0.026274	0.00312329	21	39	0.0060274
63795_4	284	24weeks	Black.Hood	Katie	8	Katie	Katie	Katie	8	NA	NA	23	287	5.26	0.0169677	94	10695	0.00319355	NA	NA	0.00309677	NA	0.003	NA	5.87	0.0189355	0.00341935	19	38	0.00651613
63800_1	268	24weeks	Brown.Hood	Katie	9	Leah	Leah	Katie	9	NA	NA	61	410	7.19	0.0152654	78	9270	0.00288747	2.239	324.832	0.00303609	104308	0.00138004	0.446001	10.45	0.0221868	0.00299363	21.5	41	0.00602972
63800_2	268	24weeks	Black.Hood	Katie	10	Leah	Leah	Katie	10	NA	NA	35	392	7.27	0.0170258	85	10155	0.00311475	1.406	310.613	0.00288056	112677	0.00290398	0.48137	10	0.0234192	0.00318501	20	40	0.00606557
63801_3	299	24weeks	Black.Hood	Katie	11	Leah	Leah	Katie	11	NA	NA	28	287	4	0.0126984	80	9210	0.00263492	1.607	251.887	0.00288889	129723	0.00206349	0.474135	5.04	0.016	0.00285714	20	37	0.00574603
63801_4	299	24weeks	Black.Hood	Katie	12	Leah	Leah	Katie	12	NA	NA	18	300	4.64	0.0145912	80	10462.5	0.0027044	1.721	344.377	0.00283019	99412	0.00320755	0.467536	6	0.0188679	0.00333333	20	38	0.00616352
63807_3	277	24weeks	Albino	Katie	11	Katie	Katie	Katie	11	NA	NA	11	262	3.64	0.0133333	89	10312.5	0.00315018	NA	NA	0.00304029	NA	0.00307692	NA	2.24	0.00820513	0.00351648	19	36	0.00655678
63807_4	277	24weeks	Albino	Katie	12	Katie	Katie	Katie	12	NA	NA	19	304	4.6	0.0142415	76	9795	0.00331269	NA	NA	0.00346749	NA	0.0025387	NA	4.68	0.0144892	0.00362229	20	38	0.00708978
63810_3	295	24weeks	Black.Hood	Katie	3	Leah	Leah	Katie	3	NA	NA	4	398	5.06	0.0125871	82	10260	0.00318408	NA	NA	0.00293532	NA	0.00199005	NA	5.25	0.0130597	0.00330846	21	43	0.00624378
63810_4	295	24weeks	Black.Hood	Katie	4	Leah	Leah	Katie	4	NA	NA	13	363	3.2	0.00851064	82	10920	0.00319149	NA	NA	0.00351064	NA	0.0025	NA	7.74	0.0205851	0.00335106	22	43	0.0068617
63810_5	295	24weeks	Black.Hood	Katie	5	Leah	Leah	Katie	5	NA	NA	34	343	5.06	0.0134218	75	10567.5	0.00403183	NA	NA	0.0034748	NA	0.0029443	NA	5.92	0.0157029	0.00339523	22	41.5	0.00687003
63810_6	295	24weeks	Black.Hood	Katie	6	Leah	Leah	Katie	6	NA	NA	31	357	5.29	0.013634	80	10837.5	0.00283505	NA	NA	0.00268041	NA	0.00229381	NA	5.74	0.0147938	0.00440722	21	41	0.00708763
63818_3	262	24weeks	Black.Hood	Katie	11	Leah	Leah	Katie	11	NA	NA	28	406	8.66	0.0199539	83	10882.5	0.00260369	NA	NA	0.0028341	NA	0.00232719	NA	11.82	0.027235	0.00304147	22	42	0.00587558
63818_4	262	24weeks	Black	Katie	12	Leah	Leah	Katie	12	NA	NA	51	358	19.13	0.0467726	75	10267.5	0.00264059	NA	NA	0.00281174	NA	0.00171149	NA	8.98	0.021956	0.00295844	22	39	0.00577017
63821_3	279	24weeks	Albino	Katie	7	Leah	Leah	Katie	7	NA	NA	27	254	3.65	0.0129893	79	9360	0.00284698	NA	NA	0.00345196	NA	0.0027758	NA	3.43	0.0122064	0.00341637	19	36	0.00686833
63821_4	279	24weeks	Brown.Hood	Katie	8	Leah	Leah	Katie	8	NA	NA	18	275	3.16	0.010785	85	10035	0.0031058	NA	NA	0.0034471	NA	0.00235495	NA	2.8	0.00955631	0.00327645	19	37.5	0.00672355
63822_3	286	24weeks	Brown.Hood	Katie	9	Leah	Leah	Katie	9	NA	NA	42	334	9.72	0.0258511	84	11085	0.00308511	NA	NA	0.00337766	NA	0.00215426	NA	10.21	0.0271543	0.0031383	21	40	0.00651596
63822_4	286	24weeks	Brown.Hood	Katie	10	Leah	Leah	Katie	10	NA	NA	61	329	8.25	0.0211538	75	10492.5	0.0025641	NA	NA	0.00341026	NA	0.00194872	NA	8.35	0.0214103	0.00382051	22	40.5	0.00723077
63837_3	292	24weeks	Black	Katie	1	Leah	Leah	Katie	1	NA	NA	46	320	3.99	0.0109016	68	10440	0.00289617	NA	NA	0.0029235	NA	0.00193989	NA	3.03	0.00827869	0.00346995	21	41	0.00639344
63837_4	292	24weeks	Brown	Katie	2	Leah	Leah	Katie	2	NA	NA	18	298	3.77	0.0119304	69	8655	0.00265823	NA	NA	0.00341772	NA	0.00306962	NA	2.6	0.00822785	0.00338608	19	39	0.0068038
63842_3	269	24weeks	Albino	Katie	13	Leah	Leah	Katie	13	NA	NA	10	383	6.35	0.0161578	85	9000	0.00277354	NA	NA	0.00330789	NA	0.00236641	NA	6.78	0.0172519	0.00335878	20	41.5	0.00666667
63842_4	269	24weeks	Black.Hood	Katie	4	Leah	Leah	Katie	4	NA	NA	25	349	6.48	0.0173262	83	11422.5	0.00262032	NA	NA	0.00347594	NA	0.00334225	NA	5.15	0.0137701	0.00334225	20	40	0.00681818
63847_3	294	24weeks	Black	Katie	5	Leah	Leah	Katie	5	NA	NA	32	317	6.35	0.0181948	73	9517.5	0.00315186	NA	NA	0.00297994	NA	0.00318052	NA	5.35	0.0153295	0.00297994	21	41.5	0.00595989
63847_4	294	24weeks	Black.Hood	Katie	6	Leah	Leah	Katie	6	NA	NA	28	326	3.06	0.00864407	83	10200	0.00305085	NA	NA	0.00274011	NA	0.00319209	NA	3.14	0.00887006	0.00254237	21	42.5	0.00528249
63848_3	296	24weeks	Black.Hood	Katie	7	Leah	Leah	Katie	7	NA	NA	23	328	4.36	0.0124217	85	9720	0.00310541	NA	NA	0.00361823	NA	0.00304843	NA	3.45	0.00982906	0.00358974	21	40.5	0.00720798
63848_4	296	24weeks	Black.Hood	Katie	8	Leah	Leah	Katie	8	NA	NA	25	402	11.71	0.0274239	89	10702.5	0.00306792	NA	NA	0.00370023	NA	0.0023185	NA	10.8	0.0252927	0.0036534	23	41.5	0.00735363
63849_3	298	24weeks	Black.Hood	Katie	1	Leah	Leah	Katie	1	NA	NA	24	360	6.82	0.0177604	84	12022.5	0.00304688	NA	NA	0.00354167	NA	0.00192708	NA	6.52	0.0169792	0.00380208	21	40	0.00734375
63849_4	298	24weeks	Brown.Hood	Katie	2	Leah	Leah	Katie	2	NA	NA	25	315	3.07	0.00902941	89	11385	0.00308824	NA	NA	0.00308824	NA	0.00285294	NA	4.57	0.0134412	0.00355882	22	40	0.00664706
63852_3	292	24weeks	Black	Katie	11	Leah	Leah	Katie	11	NA	NA	30	340	6.59	0.0178108	78	8700	0.00256757	NA	NA	0.00278378	NA	0.00202703	NA	5.06	0.0136757	0.00286486	21	39.5	0.00564865
63852_4	292	24weeks	Albino	Katie	12	Leah	Leah	Katie	12	NA	NA	31	315	5.36	0.0154913	69	8535	0.00271676	NA	NA	0.0033526	NA	0.00260116	NA	5.55	0.0160405	0.00317919	20	39	0.00653179
63854_1	274	24weeks	Black	Katie	9	Leah	Leah	Katie	9	NA	NA	24	280	3.77	0.0124013	72	8145	0.00282895	NA	NA	0.00361842	NA	0.00292763	NA	4.44	0.0146053	0.00348684	20	38	0.00710526
63854_2	274	24weeks	Black.Hood	Katie	10	Leah	Leah	Katie	10	NA	NA	24	224	2.38	0.00959677	77	8917.5	0.0028629	NA	NA	0.00358871	NA	0.00314516	NA	2.83	0.0114113	0.00358871	19	36	0.00717742
63856_3	287	24weeks	Black	Katie	1	Leah	Leah	Katie	1	NA	NA	33	307	5.34	0.0157059	81	9765	0.00267647	NA	NA	0.00338235	NA	0.00288235	NA	6.01	0.0176765	0.00314706	21	39	0.00652941
63856_4	287	24weeks	Black.Hood	Katie	2	Leah	Leah	Katie	2	NA	NA	37	269	4.12	0.0134641	81	11640	0.00310458	NA	NA	0.00398693	NA	0.00281046	NA	4.55	0.0148693	0.00392157	21	38	0.0079085
63856_5	287	24weeks	Black	Katie	3	Leah	Leah	Katie	3	NA	NA	34	308	5.13	0.015	77	10935	0.00289474	NA	NA	0.00298246	NA	0.00289474	NA	6.16	0.0180117	0.00318713	20	38	0.00616959
63856_6	287	24weeks	Black.Hood	Katie	4	Leah	Leah	Katie	4	NA	NA	39	290	5.34	0.016231	85	10995	0.00297872	NA	NA	0.00343465	NA	0.00255319	NA	4.72	0.0143465	0.0031307	21	38	0.00656535
63871_3	259	24weeks	Albino	Katie	11	Leah	Leah	Katie	11	NA	NA	21	333	7.47	0.0211017	80	10620	0.00305085	NA	NA	0.00364407	NA	0.00313559	NA	4.8	0.0135593	0.00372881	21	39	0.00737288
63871_4	259	24weeks	Black.Hood	Katie	12	Leah	Leah	Katie	12	NA	NA	51	300	8.12	0.0231339	85	10732.5	0.00287749	NA	NA	0.00327635	NA	0.0037037	NA	5.12	0.0145869	0.00333333	19	38	0.00660969
63872_3	262	24weeks	Black	Katie	3	Leah	Leah	Katie	3	NA	NA	53	437	12.08	0.0246531	96	15082.5	0.00316327	5.217	578.332	0.00285714	120326	0.0017551	0.370413	14.81	0.0302245	0.00291837	27	46	0.00577551
63872_4	262	24weeks	Black.Hood	Katie	4	Leah	Leah	Katie	4	NA	NA	45	373	6.44	0.0154067	76	11670	0.00282297	1.195	128.19	0.00301435	102868	0.00253589	0.510678	8.3	0.0198565	0.00289474	25	45	0.00590909
63873_4	271	24weeks	Black.Hood	Katie	2	Leah	Leah	Katie	2	NA	NA	20	315	5.7	0.0170149	90	10642.5	0.00274627	0.922	158.79	0.00358209	75513	0.00343284	0.521112	5.41	0.0161493	0.00367164	24	41	0.00725373
63874_3	279	24weeks	Albino	Katie	5	Leah	Leah	Katie	5	NA	NA	15	265	3.96	0.0141429	78	9660	0.00307143	NA	NA	0.00378571	NA	0.00292857	NA	2.38	0.0085	0.00375	18	36	0.00753571
63874_4	279	24weeks	Albino	Katie	6	Leah	Leah	Katie	6	NA	NA	27	273	4.5	0.015	90	10335	0.00306667	NA	NA	0.00336667	NA	0.0021	NA	3.62	0.0120667	0.00306667	19	37	0.00643333
63875_3	281	24weeks	Albino	Katie	5	Leah	Leah	Katie	5	NA	NA	39	298	4.3	0.0127596	73	9210	0.00320475	1.166	157.845	0.00317507	124527	0.0027003	0.518129	4.05	0.0120178	0.00329377	24	43	0.00646884
63875_4	281	24weeks	Black	Katie	6	Leah	Leah	Katie	6	NA	NA	31	250	2.73	0.0097153	79	9780	0.00320285	0.568	159.3	0.00338078	76000	0.00284698	0.605336	3.05	0.0108541	0.00320285	23	40	0.00658363
63895_3	265	24weeks	Brown.Hood	Katie	7	Leah	Leah	Katie	7	NA	NA	44	351	5.88	0.0148861	81	12690	0.00349367	1.051	223.387	0.00349367	73752	0.00265823	0.518111	7.78	0.0196962	0.00313924	24	42	0.00663291
63895_4	265	24weeks	Brown.Hood	Katie	13	Leah	Leah	Katie	13	NA	NA	29	317	5.5	0.015896	88	11842.5	0.00358382	1.234	260.048	0.00343931	NA	0.00277457	0.491208	7.4	0.0213873	0.00343931	23	41.5	0.00687861
63897_3	272	24weeks	Albino	Katie	9	Leah	Leah	Katie	9	NA	NA	19	285	5.46	0.0179605	79	10282.5	0.00296053	1.258	206.393	0.00342105	82421	0.0025	0.500674	5.55	0.0182566	0.00355263	23	41	0.00697368
63897_4	272	24weeks	Brown.Hood	Katie	10	Leah	Leah	Katie	10	NA	NA	26	314	5.47	0.0160882	78	8917.5	0.00326471	2.46	296.91	0.00364706	92714	0.00247059	0.438014	6.11	0.0179706	0.00355882	23	42	0.00720588
63898_3	275	24weeks	Brown	Katie	11	Leah	Leah	Katie	11	NA	NA	28	377	7.43	0.0183457	83	10395	0.00271605	1.658	285.18	0.00501235	99213	0.0031358	0.467582	7.44	0.0183704	NA	25	44	NA
63898_4	275	24weeks	Brown	Katie	12	Leah	Leah	Katie	12	NA	NA	31	337	6.6	0.0179348	81	9337.5	0.00247283	1.421	158.085	NA	76623	0.00209239	0.485183	5.94	0.0161413	0.0108152	24	44	NA
63906_3	269	17weeks	Black.Hood	Katie	1	Leah	Leah	Katie	1	77	87	-1	343	3.92	0.011462	80	9990	0.00315789	1.186	228.803	NA	126950	0.00233918	0.505772	3.99	0.0116667	NA	21	39	NA
63906_4	269	17weeks	Black.Hood	Katie	2	Leah	Leah	Katie	2	61.5	66	2	310	2.71	0.0086859	73	10372.5	0.00298077	0.399	181.005	NA	66904	0.00233974	0.682922	2.3	0.00737179	NA	21	38	NA
63910_4	289	17weeks	Brown.Hood	Katie	6	Leah	Leah	Katie	6	92	188.5	-8	393	5.67	0.0147273	78	9262.5	0.00275325	2.362	353.1	NA	131773	0.00228571	0.441428	7.34	0.0190649	NA	22	40	NA
63910_5	289	17weeks	Brown.Hood	Katie	7	Leah	Leah	Katie	7	98.5	131.5	2	397	6.1	0.0152882	76	8895	0.00260652	1.723	270.045	NA	129219	0.00263158	0.472344	7.46	0.0186967	NA	22	39	NA
63912_3	290	17weeks	Albino	Katie	11	Leah	Leah	Katie	11	62	58.5	8	320	3.85	0.0117378	80	9577.5	0.00283537	1.645	239.97	NA	109943	0.00320122	0.471864	4.39	0.0133841	NA	21	39	NA
63912_4	290	17weeks	Black.Hood	Katie	12	Leah	Leah	Katie	12	75	86	2	331	3.64	0.0109309	80	11280	0.00288288	1.367	283.155	NA	128404	0.00297297	0.490471	5.58	0.0167568	NA	21	38	NA
63913_4	293	17weeks	Black.Hood	Katie	10	Leah	Leah	Katie	10	63	93	-2	317	3.27	0.010381	77	9795	0.00371429	1.364	189.96	NA	145560	0.0031746	0.49473	2.77	0.00879365	NA	20	38	NA
63939_3	343	17weeks	Black.Hood	Katie	5	Leah	Leah	Katie	5	77.5	84	7	313	4.57	0.0142813	76	11257.5	0.00271875	1.095	296.257	NA	75176	0.00425	0.520772	3.66	0.0114375	NA	21	39	NA
63939_4	343	17weeks	Black.Hood	Katie	6	Leah	Leah	Katie	6	81	125	4	300	4.14	0.0136184	81	11632.5	0.00328947	1.275	310.478	NA	77677	0.00305921	0.496526	4.06	0.0133553	NA	19	38	NA
63940_3	279	17weeks	Albino	Jaime	1	Katie	Katie	Katie	1	56.5	69	0	254	3.14	0.0123622	83	10605	0.00338583	0.625	150.037	NA	67556	0.00354331	0.583105	2.28	0.00897638	NA	20	36	NA
63940_4	279	17weeks	Brown.Hood	Jaime	2	Katie	Katie	Katie	2	60	42	3	247	2.61	0.01044	100	12090	0.00324	0.129	90.3525	NA	88162	0.00296	0.900423	1.64	0.00656	NA	19	35.5	NA
63941_3	291	17weeks	Albino	Katie	3	Leah	Leah	Katie	3	72	52	-2	334	4.22	0.0127108	68	9495	0.00316265	0.446	139.785	NA	65673	0.00331325	0.674835	4.52	0.0136145	NA	21	37.5	NA
63941_4	291	17weeks	Albino	Katie	4	Leah	Leah	Katie	4	63	62	4	355	4.77	0.0132869	77	10395	0.00261838	0.648	244.365	NA	110140	0.00317549	0.588905	6.06	0.0168802	NA	21	38.5	NA
63942_3	292	17weeks	Albino	Jaime	3	Katie	Katie	Katie	3	52	33	-2	278	3.39	0.0122826	71	9547.5	0.00275362	0.786	148.822	NA	60329	0.00307971	0.572514	2.03	0.00735507	NA	19	38	NA
63942_4	292	17weeks	Black	Jaime	4	Katie	Katie	Katie	4	58.5	53.5	5	316	4.46	0.0138941	76	9885	0.00258567	0.645	149.7	NA	64047	0.00267913	0.591585	3.75	0.0116822	NA	19	38	NA
63942_5	292	17weeks	Albino	Jaime	5	Katie	Katie	Katie	5	60	75	-1	321	4.07	0.0127187	73	8182.5	0.00284375	0.585	155.917	NA	64308	0.00284375	0.613317	3.31	0.0103438	NA	22	41	NA
63942_6	292	17weeks	Black	Jaime	6	Katie	Katie	Katie	6	58	81	2	296	3.43	0.0115101	78	8205	0.00285235	0.594	122.895	NA	68674	0.00298658	0.600283	2.78	0.00932886	NA	20	39	NA
63944_3	296	17weeks	Black.Hood	Katie	5	Leah	Leah	Katie	5	104	137.5	-7	303	3.4	0.0114865	90	9045	0.00331081	0.48	208.688	NA	78925	0.00314189	0.61144	3.83	0.0129392	NA	22	39	NA
63944_4	296	17weeks	Black.Hood	Katie	6	Leah	Leah	Katie	6	101	129	-7	380	5.2	0.013941	86	10035	0.00302949	1.832	471.892	NA	193639	0.0022252	0.455078	7.94	0.0212869	NA	21	40.5	NA
63944_5	296	17weeks	Black.Hood	Katie	7	Leah	Leah	Katie	7	97.5	200	3	293	3.89	0.0131419	80	11002.5	0.00290541	1.112	246.975	NA	118410	0.00280405	0.513032	4.13	0.0139527	NA	19	37	NA
63944_6	296	17weeks	Black.Hood	Katie	8	Leah	Leah	Katie	8	100	86	-5	329	5.09	0.0157099	86	10927.5	0.00358025	1.007	247.447	NA	92531	0.00302469	0.516122	4.93	0.015216	NA	21	39	NA
63947_3	262	17weeks	Albino	Katie	3	Leah	Leah	Katie	3	78	84	-3	373	5.69	0.0153784	82	10905	0.00283784	2.238	301.522	NA	124884	0.00256757	0.44176	6.67	0.018027	NA	22	41	NA
63947_4	262	17weeks	Black	Katie	4	Leah	Leah	Katie	4	61	51	15	365	5.76	0.0151579	75	12510	0.00307895	0.994	212.685	NA	83068	0.00271053	0.53406	5.41	0.0142368	NA	22	42	NA
63947_5	262	17weeks	Albino	Katie	5	Leah	Leah	Katie	5	93	195.5	2	394	19.14	0.0483333	85	10927.5	0.00290404	2.158	256.793	NA	151871	0.00156566	0.441799	8.86	0.0223737	NA	21	41	NA
63948_3	265	17weeks	Brown.Hood	Katie	1	Leah	Leah	Katie	1	97	123.5	10	296	3.55	0.0116013	90	12727.5	0.00395425	0.872	201.99	NA	61647	0.00277778	0.527772	6.84	0.0223529	NA	20	37	NA
63948_4	265	17weeks	Brown.Hood	Katie	2	Leah	Leah	Katie	2	89	116	8	320	4.94	0.015061	80	14790	0.00353659	1.78	360.473	NA	62815	0.00329268	0.464358	7.04	0.0214634	NA	22	38	NA
63949_3	268	17weeks	Brown.Hood	Jaime	7	Katie	Katie	Katie	7	80.5	63.5	14	365	4.04	0.0106596	82	11040	0.00377309	1.016	346.095	NA	75218	0.00229551	0.520641	6.3	0.0166227	NA	22	41	NA
63952_3	275	17weeks	Albino	Katie	9	Leah	Leah	Katie	9	78	112	14	371	8.59	0.0223117	83	9135	0.00361039	1.902	315.548	NA	191960	0.00257143	0.454899	6.86	0.0178182	NA	22	40.5	NA
63952_4	275	17weeks	Brown	Katie	10	Leah	Leah	Katie	10	92.5	67.5	7	323	5.73	0.0173636	80	8670	0.00269697	1.72	234.66	NA	88674	0.00269697	0.467592	4.45	0.0134848	NA	20	39	NA
63953_3	276	17weeks	Black	Katie	7	Leah	Leah	Katie	7	98.5	101.5	4	363	5.87	0.0159946	78	9390	0.00305177	0.982	144.495	NA	53260	0.00346049	0.530728	3.98	0.0108447	NA	21	40	NA
63953_4	276	17weeks	Black.Hood	Katie	8	Leah	Leah	Katie	8	98	102	-1	361	6.2	0.0172222	76	9375	0.00330556	1.723	227.798	NA	59458	0.00327778	0.472344	4.54	0.0126111	NA	20	39	NA
63956_3	297	17weeks	Black.Hood	Jaime	9	Katie	Katie	Katie	9	71.5	143.5	8	302	3.22	0.0103871	88	9682.5	0.00277419	1.063	164.692	NA	95294	0.00274194	0.507353	3.99	0.012871	NA	20	37	NA
63956_4	297	17weeks	Black.Hood	Jaime	10	Katie	Katie	Katie	10	72	78.5	7	273	2.27	0.00810714	91	10365	0.00314286	0.498	115.823	NA	85360	0.00357143	0.603766	2.28	0.00814286	NA	20	38	NA
63956_5	297	17weeks	Black.Hood	Jaime	11	Katie	Katie	Katie	11	71	89	-3	297	2.71	0.00921769	96	12300	0.00326531	1.083	172.95	NA	118265	0.00282313	0.49581	2.45	0.00833333	NA	21	39	NA
63956_6	297	17weeks	Black.Hood	Jaime	12	Katie	Katie	Katie	12	85	99.5	5	288	3.01	0.010273	83	12427.5	0.00337884	0.692	203.715	NA	117365	0.00290102	0.568445	3.29	0.0112287	NA	19	36	NA
63959_3	260	17weeks	Black.Hood	Katie	11	Leah	Leah	Katie	11	68.5	72	1	292	4.99	0.0170307	83	10357.5	0.00279863	0.999	314.73	NA	83253	0.0031058	0.521202	5.68	0.0193857	NA	21	38	NA
63959_4	260	17weeks	Black.Hood	Katie	12	Leah	Leah	Katie	12	67	119.5	4	325	5.69	0.0172948	77	8595	0.0031003	1.181	220.62	NA	151200	0.00243161	0.510532	4.59	0.0139514	NA	20	39	NA
63961_3	264	17weeks	Albino	Katie	3	Leah	Leah	Katie	3	76	55	5	289	3.96	0.0134694	94	10027.5	0.00282313	1.014	229.305	NA	63301	0.0035034	0.505263	3.93	0.0133673	NA	21	38	NA
63961_4	264	17weeks	Black	Katie	4	Leah	Leah	Katie	4	84	46	4	371	4.07	0.0108533	92	9660	0.0032	0.636	109.5	NA	56576	0.00352	0.565853	5.26	0.0140267	NA	22	41	NA
63966_3	299	17weeks	Albino	Katie	1	Leah	Leah	Katie	1	87	146.5	9	338	5.69	0.0163977	94	13162.5	0.00276657	0.527	105.172	NA	105731	0.00299712	0.589992	8.7	0.025072	NA	21	39.5	NA
63966_4	299	17weeks	Brown.Hood	Katie	2	Leah	Leah	Katie	2	79.5	139	-3	259	4.51	0.0176172	75	9690	0.00273437	0.751	128.782	NA	119562	0.00285156	0.5712	4.68	0.0182812	NA	19	35	NA
63968_3	257	17weeks	Albino	Katie	7	Leah	Leah	Katie	7	76.5	65.5	9	298	2.94	0.00957655	82	8437.5	0.00299674	0.648	160.523	NA	62200	0.00390879	0.579579	1.81	0.00589577	NA	19	38	NA
63968_4	257	17weeks	Albino	Katie	8	Leah	Leah	Katie	8	71.5	138	5	355	6.19	0.0171944	79	12307.5	0.00294444	0.814	181.485	NA	78243	0.00297222	0.55302	5.32	0.0147778	NA	20	40	NA
63972_3	269	17weeks	Albino	Katie	10	Leah	Leah	Katie	10	80	101	13	321	3.36	0.0100599	84	11340	0.00266467	0.399	107.985	NA	92000	0.00299401	0.655629	3.48	0.0104192	NA	19	38	NA
63972_4	269	17weeks	Black.Hood	Katie	13	Leah	Leah	Katie	13	70.5	73	5	300	2.34	0.00767213	72	8722.5	0.00363934	0.855	200.167	NA	50598	0.00383607	0.558878	3.08	0.0100984	NA	20	37	NA
63972_5	269	17weeks	Albino	Katie	12	Leah	Leah	Katie	12	63.5	146	13	338	5.25	0.0149573	80	11167.5	0.00253561	0.928	146.588	NA	138476	0.00239316	0.534577	4.76	0.0135613	NA	20	38	NA
63974_3	291	17weeks	Brown.Hood	Katie	5	Leah	Leah	Katie	5	65	38	11	344	3.65	0.0102817	80	10545	0.00284507	0.86	222.518	NA	67447	0.00264789	0.544191	3.68	0.0103662	NA	21	38	NA
63974_4	291	17weeks	Brown	Katie	6	Leah	Leah	Katie	6	62.5	46	5	345	3.89	0.0111143	76	9405	0.00274286	0.719	131.22	NA	62484	0.00354286	0.575525	3.87	0.0110571	NA	21	38	NA
63974_5	291	17weeks	Brown.Hood	Katie	7	Leah	Leah	Katie	7	71	50.5	4	344	4.27	0.0122701	75	9667.5	0.00298851	0.796	167.685	NA	51415	0.00353448	0.563071	4.65	0.0133621	NA	21	37	NA
63974_6	291	17weeks	Albino	Katie	8	Leah	Leah	Katie	8	72	99.5	6	345	5.45	0.0155271	78	9795	0.00319088	0.766	140.82	NA	56640	0.00356125	0.562961	4.84	0.0137892	NA	21	38	NA
63975_3	267	17weeks	Black	Katie	5	Leah	Leah	Katie	5	79.5	56	13	287	3.65	0.0121667	92	10080	0.0032	0.582	102.99	NA	101560	0.00333333	0.578466	2.98	0.00993333	NA	20	37	NA
63975_4	267	17weeks	Black.Hood	Katie	6	Leah	Leah	Katie	6	94	80.5	3	354	5.44	0.0152381	94	11497.5	0.00310924	0.614	199.125	NA	103360	0.00280112	0.567764	5.65	0.0158263	NA	20	38.5	NA
63975_5	267	17weeks	Black	Katie	11	Leah	Leah	Katie	11	83.5	40	9	340	3.77	0.0108023	80	9135	0.0030659	0.848	135.368	NA	58705	0.00398281	0.546005	3.89	0.0111461	NA	22	39.5	NA
63984_3	281	17weeks	Black	Katie	1	Leah	Leah	Katie	1	78.5	125.5	3	281	3.52	0.0123944	78	10230	0.00306338	0.785	157.357	NA	65057	0.00306338	0.559608	3.74	0.013169	NA	18	35	NA
63984_4	281	17weeks	Brown	Katie	2	Leah	Leah	Katie	2	72.5	78	0	290	3.07	0.0105862	75	8535	0.00355172	0.901	164.452	NA	58755	0.00365517	0.546512	3.63	0.0125172	NA	19	38	NA
63986_3	296	17weeks	Black.Hood	Katie	9	Leah	Leah	Katie	9	98	182.5	1	313	5.25	0.0167197	83	10230	0.00289809	1.516	293.04	NA	151259	0.00171975	0.476241	4.78	0.0152229	NA	21	38	NA
63986_4	296	17weeks	Black.Hood	Katie	10	Leah	Leah	Katie	10	93	144.5	3	385	7.44	0.0191753	89	10125	0.00347938	1.98	406.988	NA	112809	0.00229381	0.445225	8.03	0.0206959	NA	23	42	NA
63986_5	296	17weeks	Black.Hood	Katie	11	Leah	Leah	Katie	11	105	84	0	329	3.08	0.0093617	80	9960	0.0031307	1.371	224.985	NA	53170	0.00322188	0.490165	4.07	0.0123708	NA	22	39	NA
63986_6	296	17weeks	Black.Hood	Katie	12	Leah	Leah	Katie	12	91	76	4	296	4.07	0.0135667	87	10897.5	0.00326667	0.78	237.9	NA	97351	0.00246667	0.545967	3.75	0.0125	NA	21	37.5	NA
63990_3	303	17weeks	Black	Katie	3	Leah	Leah	Katie	3	68.5	80.5	8	299	5.49	0.0178827	72	7837.5	0.00263844	1.39	136.05	NA	104211	0.00309446	0.499913	4.31	0.0140391	NA	19.5	37.5	NA
63990_4	303	17weeks	Black.Hood	Katie	4	Leah	Leah	Katie	4	76.5	119	8	290	4.23	0.0141946	72	12532.5	0.00278523	1.344	319.335	NA	102688	0.00214765	0.503593	3.89	0.0130537	NA	20	38	NA
63991_3	306	17weeks	Albino	Katie	7	Leah	Leah	Katie	7	47	43	1	350	3.2	0.00911681	75	11115	0.00304843	1.453	494.715	NA	95692	0.00259259	0.490839	4.39	0.0125071	NA	21.5	41	NA
63991_4	306	17weeks	Albino	Katie	8	Leah	Leah	Katie	8	72	86	-3	343	4.2	0.0123529	71	11077.5	0.00291176	1.458	307.988	NA	139609	0.00270588	0.496274	6.08	0.0178824	NA	21	41	NA
63995_3	322	17weeks	Black.Hood	Katie	9	Leah	Leah	Katie	9	67.5	188.5	6	301	4.66	0.0151792	69	9945	0.00381107	2.647	638.513	NA	170286	0.00205212	0.442164	4.65	0.0151466	NA	22	38.5	NA
63995_4	322	17weeks	Black.Hood	Katie	10	Leah	Leah	Katie	10	79.5	230.5	3	387	7.8	0.02	83	10725	0.00330769	3.887	745.2	NA	169200	0.00230769	0.398614	6.36	0.0163077	NA	20	38	NA
63997_3	271	17weeks	Black.Hood	Katie	11	Leah	Leah	Katie	11	85.5	89.5	12	278	4.57	0.0157586	84	11085	0.00282759	1.552	344.925	NA	125614	0.00196552	0.472775	4.9	0.0168966	NA	18	36	NA
63997_4	271	17weeks	Black.Hood	Katie	12	Leah	Leah	Katie	12	91	289.5	10	350	6.81	0.0189167	89	12690	0.00286111	2.884	688.68	NA	179680	0.00208333	0.415044	9.09	0.02525	NA	21	38	NA
64000_3	283	17weeks	Black	Katie	1	Leah	Leah	Katie	1	82.5	178.5	6	413	6.45	0.0153938	80	10462.5	0.00331742	1.861	334.793	NA	120549	0.00243437	0.460228	7.38	0.0176134	NA	23	42	NA
64000_4	283	17weeks	Black.Hood	Katie	13	Leah	Leah	Katie	13	96.5	81	-2	387	4.35	0.0112987	85	9922.5	0.00298701	1.675	275.34	NA	87268	0.00212987	0.464375	5.53	0.0143636	NA	22	40.5	NA
64001_3	285	17weeks	Brown	Katie	7	Leah	Leah	Katie	7	66	110	22	320	3.68	0.0107602	75	9397.5	0.00307018	1.209	223.072	NA	94170	0.00274854	0.510859	5.46	0.0159649	NA	20	38	NA
64001_4	285	17weeks	Brown.Hood	Katie	8	Leah	Leah	Katie	8	89.5	117	6	314	4.17	0.0130312	76	9697.5	0.00325	1.058	191.775	NA	97511	0.0028125	0.524852	6.38	0.0199375	NA	20	38	NA
64003_3	298	17weeks	Brown.Hood	Katie	9	Leah	Leah	Katie	9	92.5	63	6	337	2.91	0.00848397	80	11692.5	0.003207	0.716	200.91	NA	116877	0.00212828	0.568827	5.09	0.0148397	NA	20	38	NA
64003_4	298	17weeks	Black.Hood	Katie	10	Leah	Leah	Katie	10	74.5	50.5	-1	345	3.91	0.0113663	69	11295	0.00299419	0.819	193.238	NA	111698	0.0030814	0.570733	5.59	0.01625	NA	20.5	38	NA
64003_5	298	17weeks	Brown.Hood	Katie	11	Leah	Leah	Katie	11	100	82.5	2	349	4.43	0.0126211	77	10507.5	0.00293447	1.368	255.863	NA	93293	0.00282051	0.494419	5.8	0.0165242	NA	20	39	NA
64003_6	298	17weeks	Black.Hood	Katie	12	Leah	Leah	Katie	12	92.5	87	-3	332	4.13	0.0125532	83	10072.5	0.00291793	1.088	231.675	NA	96708	0.00291793	0.511324	6.03	0.0183283	NA	19	37	NA
64009_3	320	17weeks	Albino	Katie	3	Leah	Leah	Katie	3	87.5	57	1	286	3.74	0.0130314	78	10260	0.00317073	0.535	167.812	NA	78366	0.00324042	0.617113	2.9	0.0101045	NA	20	37.5	NA
64009_4	320	17weeks	Brown.Hood	Katie	4	Leah	Leah	Katie	4	71.5	74	3	217	2.64	0.012	78	9532.5	0.00345455	0.978	185.37	NA	60812	0.00313636	0.531227	2.87	0.0130455	NA	18	34	NA
64011_3	324	17weeks	Brown	Katie	5	Leah	Leah	Katie	5	118	220.5	13	397	7.23	0.0176341	73	8895	0.00282927	1.478	394.462	NA	70473	0.00268293	0.491885	8.77	0.0213902	NA	21	41	NA
64011_4	324	17weeks	Brown.Hood	Katie	6	Leah	Leah	Katie	6	59.5	93.5	11	380	6.14	0.0157033	72	8722.5	0.00319693	1.628	447.007	NA	122704	0.00181586	0.483328	8.24	0.0210742	NA	21	39.5	NA
64016_3	267	17weeks	Black	Katie	5	Leah	Leah	Katie	5	89	92	2	312	4.09	0.0130255	77	9420	0.00308917	0.804	164.07	NA	59455	0.00350318	0.558115	4.07	0.0129618	NA	20	36	NA
64016_4	267	17weeks	Black.Hood	Katie	6	Leah	Leah	Katie	6	88.5	91	5	315	4.65	0.0145313	80	9990	0.00303125	1.135	286.935	NA	108329	0.00228125	0.510703	6.16	0.01925	NA	20	37	NA
64016_5	267	17weeks	Black	Katie	7	Leah	Leah	Katie	7	87.5	87	8	307	4.18	0.0132698	81	10927.5	0.00279365	1.313	239.153	NA	84000	0.0028254	0.493401	4.83	0.0153333	NA	20	37	NA
64016_6	267	17weeks	Black.Hood	Katie	8	Leah	Leah	Katie	8	96	82.5	11	343	4.59	0.0129661	78	10342.5	0.00319209	1.081	274.68	NA	70796	0.0029096	0.519232	5.51	0.015565	NA	20	38	NA
64023_3	305	17weeks	Black.Hood	Katie	1	Leah	Leah	Katie	1	28	134	5	290	2.18	0.00738983	81	9885	0.00311864	0.783	149.393	NA	68565	0.00311864	0.554863	3.39	0.0114915	NA	18	35	NA
64023_4	305	17weeks	Black.Hood	Katie	2	Leah	Leah	Katie	2	80	56	-3	328	2.44	0.00750769	85	9922.5	0.00341538	1.259	186.472	NA	49699	0.00347692	0.492746	3.51	0.0108	NA	20	39	NA
64024_3	327	17weeks	Brown.Hood	Katie	3	Leah	Leah	Katie	3	80	78.5	5	346	6.94	0.0197721	78	11160	0.00299145	1.623	320.625	NA	148919	0.00210826	0.475644	8.41	0.0239601	NA	22	40	NA
64024_4	327	17weeks	Black.Hood	Katie	4	Leah	Leah	Katie	4	72.5	67.5	7	353	4.67	0.0129722	72	9690	0.00319444	0.853	169.808	NA	84383	0.00319444	0.559196	5.58	0.0155	NA	20	40	NA
64026_3	337	17weeks	Black.Hood	Katie	9	Leah	Leah	Katie	9	98	118.5	2	345	6	0.0172911	84	8797.5	0.00337176	1.963	269.205	NA	95470	0.00239193	0.451019	5.33	0.0153602	NA	20	39	NA
64026_4	337	17weeks	Black.Hood	Katie	10	Leah	Leah	Katie	10	78	77	7	309	3.59	0.0113608	79	10447.5	0.00306962	0.604	161.865	NA	70680	0.00325949	0.595712	4.14	0.0131013	NA	19	38	NA
64027_3	257	17weeks	Albino	Katie	11	Leah	Leah	Katie	11	78.5	66.5	2	357	4.54	0.0126462	77	9315	0.00292479	1.256	189.93	NA	84038	0.00289694	0.503656	3.51	0.00977716	NA	20.5	40.5	NA
64027_4	257	17weeks	Albino	Katie	12	Leah	Leah	Katie	12	64.5	74	5	352	4.61	0.0129132	78	10230	0.00266106	0.979	212.625	NA	98040	0.00280112	0.531102	3.81	0.0106723	NA	21	39.5	NA
64034_3	297	17weeks	Black.Hood	Katie	1	Leah	Leah	Katie	1	66	123	5	307	3.27	0.0104808	95	12885	0.00262821	0.859	170.91	NA	120623	0.00246795	0.52309	3.69	0.0118269	NA	19	36.5	NA
64034_4	297	17weeks	Black.Hood	Katie	2	Leah	Leah	Katie	2	91.5	130.5	-4	357	3.97	0.0112465	88	11212.5	0.00300283	1.008	291.712	NA	80613	0.00351275	0.513362	4.39	0.0124363	NA	19	38	NA
64038_3	308	17weeks	Brown	Katie	9	Leah	Leah	Katie	9	72.5	65	8	316	3.47	0.0107099	81	8685	0.0029321	1.348	191.993	NA	90138	0.00358025	0.490635	3.96	0.0122222	NA	18	37	NA
64038_4	308	17weeks	Brown.Hood	Katie	10	Leah	Leah	Katie	10	64	100	9	337	6.1	0.0176301	83	9022.5	0.00309249	1.018	224.835	NA	83200	0.00274566	0.518988	6.76	0.0195376	NA	21	38	NA
64039_3	309	17weeks	Brown	Katie	11	Leah	Leah	Katie	11	85.5	69	5	320	3.71	0.0114154	91	13260	0.00436923	1.187	206.925	NA	85286	0.00344615	0.491765	4.89	0.0150462	NA	20	37	NA
64039_4	309	17weeks	Black.Hood	Katie	12	Leah	Leah	Katie	12	99.5	75	1	324	4.03	0.0124	87	10447.5	0.00344615	0.82	175.26	NA	70063	0.00292308	0.539568	5.49	0.0168923	NA	21	39	NA
64040_3	313	17weeks	Albino	Katie	5	Leah	Leah	Katie	5	80	90.5	11	329	2.66	0.00782353	79	10755	0.00388235	0.497	140.67	NA	93591	0.00273529	0.627359	5.64	0.0165882	NA	20	37	NA
64040_4	313	17weeks	Black.Hood	Katie	6	Leah	Leah	Katie	6	73.5	119.5	5	341	4.8	0.0138728	85	8272.5	0.00289017	1.08	209.295	NA	84911	0.00228324	0.509465	6.38	0.0184393	NA	21	37.5	NA
64043_3	331	17weeks	Brown.Hood	Katie	3	Leah	Leah	Katie	3	65.5	46.5	12	297	3.69	0.0119417	85	9615	0.00320388	0.44	147.683	NA	64991	0.00352751	0.63578	3.22	0.0104207	NA	19	37	NA
64043_4	331	17weeks	Brown.Hood	Katie	4	Leah	Leah	Katie	4	78	52.5	9	331	4.55	0.0133824	80	10702.5	0.00261765	1.378	277.808	NA	67652	0.00270588	0.489635	5.58	0.0164118	NA	20	39	NA
64045_3	336	17weeks	Black	Katie	7	Leah	Leah	Katie	7	71.5	179	3	362	4.85	0.0132877	80	10020	0.00350685	1.259	298.725	NA	118323	0.00254795	0.499222	8.87	0.0243014	NA	21	40	NA
64045_4	336	17weeks	Black	Katie	8	Leah	Leah	Katie	8	71	87	8	335	5.41	0.0157726	85	9997.5	0.00367347	1.074	234.938	NA	119636	0.0019242	0.510094	7.41	0.0216035	NA	21	40	NA
64057_3	302	17weeks	Albino	Katie	9	Leah	Leah	Katie	9	58	159	6	340	10.65	0.0307803	72	9772.5	0.00265896	2.875	477.983	NA	64787	0.00352601	0.431784	6.9	0.0199422	NA	21	39	NA
64057_4	302	17weeks	Black	Katie	10	Leah	Leah	Katie	10	64	139.5	10	287	6.33	0.0213131	81	11137.5	0.00272727	1.408	338.767	NA	83721	0.00289562	0.486124	4.44	0.0149495	NA	19	37	NA
64060_3	307	17weeks	Brown.Hood	Katie	11	Leah	Leah	Katie	11	103	95.5	13	396	4.22	0.0103178	83	10350	0.00317848	2.519	342.57	NA	77752	0.00256724	0.430978	12.25	0.0299511	NA	22	42	NA
64060_4	307	17weeks	Albino	Katie	12	Leah	Leah	Katie	12	83	67	11	374	5.84	0.0151688	85	8490	0.00298701	1.924	325.245	NA	74538	0.00241558	0.451748	8.41	0.0218442	NA	20	41	NA
64064_3	318	17weeks	Albino	Katie	3	Leah	Leah	Katie	3	80.5	69	-1	350	5.58	0.0159885	83	9540	0.00283668	1.292	162.982	NA	68383	0.00329513	0.492528	3.98	0.011404	NA	21	38.5	NA
64064_4	318	17weeks	Brown	Katie	4	Leah	Leah	Katie	4	94	89	8	332	4.79	0.0140882	80	8715	0.00285294	0.622	158.535	NA	56139	0.00338235	0.589317	3.93	0.0115588	NA	19	38.5	NA
64068_3	329	17weeks	Black	Katie	5	Leah	Leah	Katie	5	65.5	44	8	329	3.81	0.0113056	87	10717.5	0.00326409	0.992	179.347	NA	127571	0.00249258	0.516521	3.88	0.0115134	NA	20	38	NA
64068_4	329	17weeks	Black	Katie	6	Leah	Leah	Katie	6	84.5	122	4	338	5.03	0.0147076	85	10440	0.00292398	1.235	211.74	NA	182560	0.00219298	0.494784	5.73	0.0167544	NA	19	36.5	NA
64069_3	310	17weeks	Brown.Hood	Katie	1	Leah	Leah	Katie	1	96.5	101	6	387	4.76	0.012112	79	11857.5	0.0059542	1.882	295.627	NA	99170	0.0026972	0.460353	7.34	0.0186768	NA	20	39	NA
64069_4	310	17weeks	Brown	Katie	2	Leah	Leah	Katie	2	81	159	8	355	5.74	0.0158127	89	10215	0.00253444	0.971	137.393	NA	85103	0.00319559	0.516366	7.03	0.0193664	NA	20	37.5	NA
64070_3	338	17weeks	Black.Hood	Katie	7	Leah	Leah	Katie	7	82.5	118	9	357	4.79	0.0130874	74	9735	0.00338798	1.265	276.555	NA	107858	0.00308743	0.507274	6.61	0.0180601	NA	21	40	NA
64070_4	338	17weeks	Black.Hood	Katie	8	Leah	Leah	Katie	8	82	172.5	-3	373	4.74	0.0128108	89	9682.5	0.00332432	0.62	221.752	NA	152739	0.00248649	0.574125	6.81	0.0184054	NA	20	37	NA
64104_3	301	17weeks	Black	Jaime	7	Katie	Katie	Katie	7	74.5	92	3	346	8.32	0.0238395	88	11167.5	0.00286533	1.047	497.228	NA	104600	0.0034384	0.509054	4.36	0.0124928	NA	20	39	NA
64104_4	301	17weeks	Black.Hood	Jaime	8	Katie	Katie	Katie	8	76.5	160	-5	340	5.31	0.0158507	90	10777.5	0.00307463	1.342	476.1	NA	110112	0.00373134	0.480309	5.09	0.015194	NA	21	39	NA
64105_3	304	17weeks	Brown.Hood	Katie	11	Leah	Leah	Katie	11	24	99	3	270	4.38	0.016044	73	7717.5	0.00282051	4.032	446.55	NA	137091	0.00282051	0.405048	3.59	0.0131502	NA	20	36.5	NA
64105_4	304	17weeks	Black.Hood	Katie	12	Leah	Leah	Katie	12	75	69	6	300	4.74	0.0154902	78	9172.5	0.00303922	1.158	242.708	NA	119636	0.00287582	0.511299	4.71	0.0153922	NA	18	36	NA
64106_3	305	17weeks	Black.Hood	Jaime	1	Katie	Katie	Katie	1	59	95.5	9	254	2.77	0.0105323	76	10350	0.00269962	0.748	165.727	NA	107294	0.00258555	0.569893	3.5	0.013308	NA	19.5	36	NA
64106_4	305	17weeks	Black.Hood	Jaime	2	Katie	Katie	Katie	2	35.5	205	5	209	2.02	0.00943925	74	10110	0.0032243	0.483	101.963	NA	91614	0.0038785	0.643841	1.71	0.00799065	NA	19	35	NA
64106_5	305	17weeks	Black.Hood	Jaime	3	Katie	Katie	Katie	3	27	101.5	5	275	4.04	0.0144286	80	10125	0.00296429	0.503	108.007	NA	99814	0.00307143	0.623186	4.97	0.01775	NA	19	36	NA
64108_3	315	17weeks	Black.Hood	Jaime	1	Katie	Katie	Katie	1	97.5	306.5	12	320	4.81	0.014488	84	12052.5	0.00334337	2.728	701.64	NA	123673	0.00331325	0.423707	5.87	0.0176807	NA	19	37	NA
64108_4	315	17weeks	Black.Hood	Jaime	2	Katie	Katie	Katie	2	77.5	160	4	296	3.75	0.0125	89	12015	0.0029	0.952	423.375	NA	169433	0.00223333	0.518665	4.06	0.0135333	NA	17	35	NA
64109_3	316	17weeks	Black.Hood	Katie	1	Leah	Leah	Katie	1	79	81.5	16	334	4.57	0.0130571	78	9435	0.00308571	1.691	225.248	NA	97322	0.00345714	0.471645	5.17	0.0147714	NA	20.5	39	NA
64109_4	316	17weeks	Brown.Hood	Katie	2	Leah	Leah	Katie	2	80	76.5	7	397	5.26	0.0130198	80	9157.5	0.00311881	0.854	174.3	NA	75346	0.00378713	0.545093	5.84	0.0144554	NA	20	38.5	NA
64110_3	326	17weeks	Black	Katie	9	Leah	Leah	Katie	9	69	90	2	338	3.25	0.00955882	81	11100	0.00311765	0.983	193.852	NA	140440	0.00267647	0.526028	4.99	0.0146765	NA	22	41.5	NA
64110_4	326	17weeks	Black	Katie	10	Leah	Leah	Katie	10	69.5	61	0	330	4.16	0.0126061	77	10027.5	0.00284848	1.023	220.02	NA	129465	0.00306061	0.527324	6.06	0.0183636	NA	20	39	NA
64111_3	328	17weeks	Brown	Jaime	9	Katie	Katie	Katie	9	74.5	108.5	8	359	7.28	0.0198365	83	11535	0.00239782	0.606	383.572	NA	150038	0.00283379	0.587699	8.84	0.0240872	NA	20.5	38.5	NA
64112_3	330	17weeks	Brown.Hood	Jaime	10	Katie	Katie	Katie	10	73.5	63.5	2	320	3.53	0.0109627	78	8895	0.00295031	0.778	189.495	NA	97843	0.0031677	0.560829	5.87	0.0182298	NA	20.5	38.5	NA
64113_3	332	17weeks	Albino	Jaime	11	Katie	Katie	Katie	11	96.5	56.5	17	387	5.04	0.0124752	78	10177.5	0.00304455	0.63	221.55	NA	97824	0.00336634	0.591214	5.83	0.0144307	NA	21	40	NA
64113_4	332	17weeks	Albino	Jaime	12	Katie	Katie	Katie	12	76	42.5	-1	306	2.7	0.00885246	76	10342.5	0.00311475	0.503	131.303	NA	93257	0.00344262	0.631959	3.14	0.0102951	NA	20	36	NA
64114_3	333	17weeks	Black	Katie	3	Leah	Leah	Katie	3	79.5	38.5	16	318	3.25	0.00973054	71	8025	0.00251497	0.646	141.773	NA	101036	0.00335329	0.601869	4.24	0.0126946	NA	19.5	37.5	NA
64114_4	333	17weeks	Black.Hood	Katie	4	Leah	Leah	Katie	4	75.5	49	11	248	3.15	0.0121622	68	8857.5	0.00285714	0.372	90.7425	NA	133159	0.00266409	0.712732	2.94	0.0113514	NA	18	35	NA
64114_5	333	17weeks	Black	Katie	5	Leah	Leah	Katie	5	64.5	75	-1	315	4.65	0.0148089	70	9180	0.0027707	0.966	137.31	NA	100974	0.00366242	0.546426	4.9	0.0156051	NA	19	36.5	NA
64114_6	333	17weeks	Black	Katie	6	Leah	Leah	Katie	6	75.5	54.5	8	329	3.63	0.0107715	69	8857.5	0.00287834	0.076	65.2275	NA	124688	0.00275964	1.38954	5.08	0.0150742	NA	20	37	NA
64115_3	334	17weeks	Brown.Hood	Jaime	3	Katie	Katie	Katie	3	56	40.5	8	289	3.45	0.0116162	78	10627.5	0.00326599	0.271	138.067	NA	136753	0.00286195	0.754681	3.73	0.0125589	NA	19.5	38	NA
64115_4	334	17weeks	Black	Jaime	4	Katie	Katie	Katie	4	70	53.5	9	306	3.81	0.0120952	75	12502.5	0.00368254	0.559	248.625	NA	113811	0.00301587	0.616343	4.1	0.0130159	NA	20	39	NA
64116_3	335	17weeks	Black.Hood	Jaime	5	Katie	Katie	Katie	5	60.5	103.5	2	297	3.39	0.0113378	86	11182.5	0.00428094	1.789	273.855	NA	155027	0.00247492	0.457225	4.5	0.0150502	NA	19	39.5	NA
64116_4	335	17weeks	Black.Hood	Jaime	6	Katie	Katie	Katie	6	61.5	70	2	314	3.32	0.0105063	88	11017.5	0.00420886	0.75	220.35	NA	116183	0.00344937	0.549588	3.65	0.0115506	NA	19	40.5	NA
64119_3	337	17weeks	Black.Hood	Katie	7	Leah	Leah	Katie	7	82	117.5	5	313	4.95	0.015566	85	9322.5	0.00330189	1.262	224.31	NA	137773	0.0027673	0.492495	5.76	0.0181132	NA	19	36	NA
64119_4	337	17weeks	Black.Hood	Katie	8	Leah	Leah	Katie	8	79.5	100	4	295	3.51	0.0117391	84	8167.5	0.00344482	1.109	210.757	NA	114776	0.00284281	0.507818	4.33	0.0144816	NA	19.5	37.5	NA
64121_3	339	17weeks	Brown.Hood	Stephen	1	Leah	Leah	Katie	1	81	60	10	360	4.25	0.0114865	77	12555	0.00289189	NA	NA	NA	123649	0.00308108	NA	4.89	0.0132162	NA	20	39	NA
64121_4	339	17weeks	Black.Hood	Stephen	2	Leah	Leah	Katie	2	87.5	103	-1	375	4.36	0.0116578	87	11407.5	0.00272727	NA	NA	NA	113571	0.00374332	NA	5.47	0.0146257	NA	21	38.5	NA
64131_3	314	17weeks	Black.Hood	Jaime	7	Katie	Katie	Katie	7	87.5	74.5	9	365	4.46	0.0119251	87	12375	0.00272727	0.706	643.447	NA	101010	0.00264706	0.559183	3.89	0.0104011	NA	21	39.5	NA
64131_4	314	17weeks	Black.Hood	Jaime	8	Katie	Katie	Katie	8	75.5	107	7	279	4.39	0.0153497	88	12060	0.00293706	1.47	591.39	NA	134959	0.00255245	0.47353	4.65	0.0162587	NA	20	37.5	NA
64134_3	321	17weeks	Albino	Jaime	9	Katie	Katie	Katie	9	66.5	86.5	-7	327	6.46	0.0201875	87	11985	0.00365625	2.967	355.613	NA	129853	0.00296875	0.414622	5.8	0.018125	NA	20	37.5	NA
64134_4	321	17weeks	Brown	Jaime	10	Katie	Katie	Katie	10	60.5	95	3	281	6	0.0211268	87	10087.5	0.00285211	2.157	328.56	NA	157397	0.00221831	0.439876	5.32	0.0187324	NA	18	35	NA
64134_5	321	17weeks	Albino	Jaime	11	Katie	Katie	Katie	11	60.5	86	2	301	6.62	0.0218482	85	11572.5	0.00343234	5.178	620.28	NA	280862	0.00214521	0.378275	5.98	0.019736	NA	19	36	NA
64134_6	321	17weeks	Brown.Hood	Jaime	12	Katie	Katie	Katie	12	53.5	108	8	284	4.18	0.0143151	92	11482.5	0.00349315	2.07	276.277	NA	136186	0.00294521	0.438643	4.58	0.0156849	NA	18	36	NA
64142_3	319	17weeks	Albino	Katie	9	Leah	Leah	Katie	9	66	47.5	5	324	4.29	0.0130395	85	11377.5	0.00285714	3.223	427.553	NA	152144	0.00337386	0.410226	3.77	0.011459	NA	21	39.5	NA
64142_4	319	17weeks	Black.Hood	Katie	10	Leah	Leah	Katie	10	59	87.5	-2	333	4.26	0.0128701	86	10462.5	0.00356495	1.384	202.77	NA	159776	0.00323263	0.48178	3.49	0.0105438	NA	21	40.5	NA
64146_3	330	17weeks	Black.Hood	Katie	6	Leah	Leah	Katie	6	91.5	100.5	9	309	4.56	0.0143396	82	12427.5	0.00292453	1.444	317.947	NA	145708	0.00301887	0.482304	5.76	0.0181132	NA	19.5	37	NA
64146_4	330	17weeks	Brown.Hood	Katie	7	Leah	Leah	Katie	7	94	116	7	349	5.96	0.0167416	94	10507.5	0.00342697	1.471	311.048	NA	177627	0.00331461	0.467128	6.92	0.0194382	NA	21	39	NA
64148_3	340	17weeks	Black.Hood	Katie	11	Leah	Leah	Katie	11	89	54	7	286	2.49	0.00849829	81	10852.5	0.00324232	1.9	257.235	NA	152190	0.00358362	0.457197	5.05	0.0172355	NA	20	37.5	NA
64148_4	340	17weeks	Albino	Katie	12	Leah	Leah	Katie	12	89	54	10	369	4.29	0.0113193	82	12457.5	0.00274406	1.618	311.97	NA	194345	0.00306069	0.471078	6.9	0.0182058	NA	23	41.5	NA
64149_3	342	17weeks	Brown.Hood	Katie	10	Leah	Leah	Katie	10	84.5	61	10	311	5.17	0.0161059	89	12262.5	0.00286604	2.241	476.483	NA	146510	0.00317757	0.434814	4.48	0.0139564	NA	21	39	NA
64149_4	342	17weeks	Black.Hood	Katie	11	Leah	Leah	Katie	11	72.5	151	6	267	4.54	0.01663	85	11842.5	0.00300366	1.621	287.715	NA	148162	0.00362637	0.467464	4.56	0.0167033	NA	21	37.5	NA
64152_3	316	17weeks	Brown	Katie	8	Leah	Leah	Katie	8	76	82.5	-3	357	3.6	0.0101695	75	9577.5	0.00322034	1.638	284.43	NA	129410	0.00344633	0.478612	5.03	0.014209	NA	21	40	NA
64152_4	316	17weeks	Brown.Hood	Katie	9	Leah	Leah	Katie	9	95	136	6	334	3.97	0.0116765	75	7942.5	0.00273529	1.755	350.58	NA	186212	0.0025	0.471845	6.95	0.0204412	NA	21	37.5	NA
64154_3	327	17weeks	Black.Hood	Katie	1	Leah	Leah	Katie	1	72.5	158.5	-1	281	4.49	0.0160357	82	9877.5	0.00546429	1.609	211.155	NA	189403	0.00275	0.471616	6.13	0.0218929	NA	20	36.5	NA
64154_4	327	17weeks	Brown.Hood	Katie	2	Leah	Leah	Katie	2	76.5	141	10	293	5.15	0.0169967	87	10980	0.0030033	0.963	186.435	NA	125682	0.00290429	0.519981	5.92	0.019538	NA	20	36	NA
64156_3	337	17weeks	Black.Hood	Katie	12	Leah	Leah	Katie	12	108.5	75.5	-11	290	3.05	0.0109319	86	9675	0.00369176	1.599	219.352	NA	130849	0.00261649	0.467651	3.24	0.0116129	NA	19	37	NA
64159_3	313	17weeks	Black.Hood	Katie	3	Leah	Leah	Katie	3	92	84.5	16	332	3.93	0.0112931	86	11310	0.0033046	1.09	257.678	NA	88110	0.00313218	0.507119	5.38	0.0154598	NA	20.5	37.5	NA
64159_4	313	17weeks	Black.Hood	Katie	4	Leah	Leah	Katie	4	100.5	102.5	13	374	4.96	0.0128165	89	10590	0.0026615	1.173	448.447	NA	127754	0.00335917	0.495371	7.34	0.0189664	NA	21	38	NA
64160_2	315	17weeks	Black.Hood	Katie	6	Leah	Leah	Katie	6	91.5	127.5	12	288	3.93	0.0131	82	9045	0.0037	1.046	191.303	NA	126515	0.00323333	0.517238	4.07	0.0135667	NA	20.5	38	NA
64162_3	323	17weeks	Black.Hood	Katie	7	Leah	Leah	Katie	7	62	49	8	295	2.78	0.00917492	75	9855	0.00788779	1.079	197.145	NA	240565	0.0030363	0.524086	3.25	0.0107261	NA	22	40.5	NA
64162_4	323	17weeks	Brown.Hood	Katie	8	Leah	Leah	Katie	8	55.5	56	4	253	3.09	0.0120233	80	10207.5	0.00350195	1.035	195.51	NA	52049	0.00319066	0.521368	2.71	0.0105447	NA	20	38	NA
64163_3	331	17weeks	Albino	Katie	9	Leah	Leah	Katie	9	83	77.5	6	396	4.81	0.0119652	81	10380	0.00323383	1.46	294.9	NA	83882	0.00338308	0.48243	6.75	0.016791	NA	21	40	NA
64163_4	331	17weeks	Brown.Hood	Katie	10	Leah	Leah	Katie	10	84.5	58.5	1	320	4.09	0.0127414	84	9810	0.00358255	4.389	422.002	NA	95250	0.0034891	0.389614	3.81	0.0118692	NA	20	39	NA
64163_5	331	17weeks	Albino	Katie	11	Leah	Leah	Katie	11	65.5	85.5	5	312	4.71	0.014858	78	10372.5	0.00324921	1.007	362.385	NA	137382	0.00347003	0.52767	4.21	0.0132808	NA	21	39	NA
64163_6	331	17weeks	Brown.Hood	Katie	12	Leah	Leah	Katie	12	92	73.5	5	323	4.55	0.013872	90	10680	0.00292683	1.155	253.732	NA	104808	0.00317073	0.495829	5.6	0.0170732	NA	20	38	NA
64164_3	333	17weeks	Black	Katie	5	Leah	Leah	Katie	5	95	89.5	7	398	4.69	0.0115802	78	9817.5	0.00296296	1.243	171.548	NA	71694	0.00387654	0.503381	6.78	0.0167407	NA	21	39	NA
64166_3	303	17weeks	Albino	Jaime	3	Katie	Katie	Katie	3	80	72.5	4	357	6.65	0.0184211	79	8850	0.00274238	2.351	379.373	NA	108040	0.00277008	0.440746	5.51	0.0152632	NA	22	39.5	NA
64166_4	303	17weeks	Black	Jaime	4	Katie	Katie	Katie	4	81	64	5	344	6.81	0.0195129	77	10672.5	0.00277937	1.914	517.643	NA	149271	0.0030659	0.461163	5.48	0.015702	NA	21	39	NA
64166_5	303	17weeks	Albino	Jaime	5	Katie	Katie	Katie	5	82	68.5	5	350	6.87	0.0193521	80	10762.5	0.00253521	1.385	307.043	NA	131176	0.00383099	0.489108	5.6	0.0157746	NA	21	38.5	NA
64167_3	308	17weeks	Black.Hood	Jaime	7	Katie	Katie	Katie	7	96.5	90	6	345	5.06	0.014416	80	9742.5	0.00279202	1.391	199.838	NA	131207	0.00330484	0.488659	5.58	0.0158974	NA	21	39	NA
64167_4	308	17weeks	Brown.Hood	Jaime	8	Katie	Katie	Katie	8	76	66.5	12	351	4.13	0.0113774	82	9832.5	0.0031405	0.992	210.225	NA	149647	0.00327824	0.523471	5.08	0.0139945	NA	21	40	NA
64168_3	314	17weeks	Black.Hood	Jaime	9	Katie	Katie	Katie	9	72	117.5	7	300	4.18	0.0136156	89	8347.5	0.00283388	2.499	238.935	NA	163720	0.00325733	0.426047	3.31	0.0107818	NA	20.5	38.5	NA
64168_4	314	17weeks	Black.Hood	Jaime	10	Katie	Katie	Katie	10	86.5	172	18	335	4.5	0.0127479	91	9570	0.00280453	2.147	329.108	NA	111143	0.0031728	0.436515	4.92	0.0139377	NA	20.5	39	NA
64170_3	335	17weeks	Black.Hood	Katie	13	Leah	Leah	Katie	11	71.5	86.5	-8	292	3.32	0.0116901	74	9637.5	0.00521127	1.372	179.925	NA	124124	0.00341549	0.498359	3.74	0.013169	NA	19	39.5	NA
64170_4	335	17weeks	Black.Hood	Jaime	12	Katie	Katie	Katie	12	62	107	6	300	3.88	0.0126797	84	10425	0.00362745	1.673	227.662	NA	87961	0.00336601	0.465598	5.39	0.0176144	NA	20	39.5	NA
64171_3	343	17weeks	Black.Hood	Jaime	1	Katie	Katie	Katie	1	146.5	251.5	6	373	4.55	0.0120053	83	11752.5	0.0030343	1.366	270.465	NA	91178	0.00385224	0.48673	5.55	0.0146438	NA	21	41	NA
64177_3	306	17weeks	Brown	Katie	1	Leah	Leah	Katie	1	64	54	20	382	5.14	0.0127861	79	12832.5	0.00256219	1.131	222.045	NA	147742	0.00231343	0.512534	6.78	0.0168657	NA	22	41.5	NA
64177_4	306	17weeks	Albino	Katie	2	Leah	Leah	Katie	2	61.5	62	6	350	4.29	0.0120506	77	10627.5	0.00303371	1.384	269.88	NA	100717	0.00297753	0.493187	4.36	0.0122472	NA	20	40.5	NA
64180_3	312	17weeks	Black.Hood	Katie	3	Leah	Leah	Katie	3	72.5	134.5	18	381	7.21	0.0180702	80	11040	0.00451128	3.223	575.768	NA	146704	0.00270677	0.414705	9.63	0.0241353	NA	20.5	39.5	NA
64180_4	312	17weeks	Black.Hood	Katie	4	Leah	Leah	Katie	4	88.5	84	8	405	6.26	0.0151574	88	10552.5	0.00360775	1.198	237.847	NA	118330	0.0027845	0.49433	9.27	0.0224455	NA	22	42	NA
64183_3	319	17weeks	Albino	Katie	5	Leah	Leah	Katie	5	73	89.5	4	351	5.95	0.0167606	83	9690	0.00284507	1.643	193.395	NA	122351	0.00369014	0.468446	3.84	0.0108169	NA	21	39.5	NA
64183_4	319	17weeks	Black.Hood	Katie	6	Leah	Leah	Katie	6	59	96	1	337	6.37	0.0188462	83	9825	0.00310651	3.061	455.895	NA	197593	0.00319527	0.415811	5.14	0.0152071	NA	22	41	NA
64185_3	324	17weeks	Brown	Katie	9	Leah	Leah	Katie	9	114.5	166	8	367	4.81	0.0128267	83	9517.5	0.00338667	2.5	476.408	NA	91241	0.00309333	0.431589	6.7	0.0178667	NA	22	41	NA
64185_4	324	17weeks	Black	Katie	10	Leah	Leah	Katie	10	59.5	92.5	6	337	4.3	0.0125364	79	8730	0.00300292	2.875	386.332	NA	188138	0.00253644	0.4244	6.14	0.0179009	NA	21	38	NA
64186_3	329	17weeks	Black	Katie	7	Leah	Leah	Katie	7	83	93.5	8	347	5.67	0.0159718	87	9877.5	0.00323944	2.77	356.205	NA	182754	0.00343662	0.419815	4.64	0.0130704	NA	20	39	NA
64186_4	329	17weeks	Black	Katie	8	Leah	Leah	Katie	8	76	117	2	372	4.59	0.0122727	81	11280	0.00299465	1.198	411.345	NA	202161	0.0023262	0.503286	5.18	0.0138503	NA	22.5	40.5	NA
64188_3	338	17weeks	Black.Hood	Katie	11	Leah	Leah	Katie	1	103.5	208.5	19	375	8.58	0.0217766	92	9375	0.00281726	4.203	476.94	NA	282541	0.00187817	0.386496	8.59	0.021802	NA	22	41	NA
64188_4	338	17weeks	Black.Hood	Stephen	13	Katie	Katie	Katie	2	82.5	83.5	19	359	3.69	0.0097619	84	9900	0.00335979	0.753	187.433	NA	160185	0.00285714	0.555224	3.62	0.00957672	NA	20	39	NA
64190_3	311	17weeks	Brown.Hood	Stephen	7	Katie	Katie	Katie	3	87.5	67.5	10	336	4.24	0.0122543	83	12112.5	0.00352601	1.852	282.562	NA	26604	0.00306358	0.457306	6.67	0.0192775	NA	21	40	NA
64190_4	311	17weeks	Brown.Hood	Stephen	13	Katie	Katie	Katie	4	80	98	10	287	3.91	0.013165	72	11812.5	0.00350168	1.424	349.155	NA	218538	0.00313131	0.497304	5.75	0.0193603	NA	20	36	NA
64191_3	313	17weeks	Black.Hood	Stephen	4	Katie	Katie	Katie	10	85	90.5	3	365	3.85	0.010462	79	9420	0.00290761	0.678	210.683	NA	167292	0.0026087	0.578417	6.16	0.0167391	NA	20	37.5	NA
64191_4	313	17weeks	Albino	Stephen	5	Katie	Katie	Katie	11	72.5	57	7	320	2.85	0.0087156	82	9787.5	0.00308869	0.56	139.732	NA	278144	0.00296636	0.601684	4.16	0.0127217	NA	20	38	NA
64191_5	313	17weeks	Black.Hood	Stephen	6	Katie	Katie	Katie	12	75	73.5	1	305	3.09	0.010098	78	9577.5	0.00346405	0.888	157.875	NA	132087	0.00300654	0.543328	4.34	0.014183	NA	19.5	36.5	NA
64192_3	315	17weeks	Black.Hood	Stephen	7	Katie	Katie	Katie	13	87	130	3	275	3.61	0.0129856	83	10342.5	0.00291367	2.342	338.123	NA	130528	0.00381295	0.436936	4.7	0.0169065	NA	18.5	36	NA
64192_4	315	17weeks	Black.Hood	Stephen	8	Katie	Katie	Katie	14	93.5	109.5	9	280	3.52	0.0121799	88	10065	0.0032872	0.954	152.025	NA	150278	0.00273356	0.519742	3.55	0.0122837	NA	19	37	NA
64194_3	325	17weeks	Black.Hood	Stephen	1	Katie	Katie	Katie	7	81	107.5	5	318	3.1	0.00959752	82	11737.5	0.00315789	2.208	431.288	NA	158622	0.00278638	0.442906	4.27	0.0132198	NA	20.5	38.5	NA
64194_4	325	17weeks	Black.Hood	Stephen	2	Katie	Katie	Katie	8	104.5	215	1	370	19.18	0.0516981	87	10215	0.00326146	2.72	293.865	NA	149961	0.00274933	0.421214	9.41	0.0253639	NA	22.5	41	NA
64196_3	327	17weeks	Black.Hood	Stephen	9	Katie	Katie	Katie	13	85	133.5	2	345	4.58	0.0131988	85	10252.5	0.00285303	2.302	318.277	NA	223292	0.00325648	0.436391	9.61	0.0276945	NA	22	41.5	NA
64196_4	327	17weeks	Brown.Hood	Stephen	13	Leah	Leah	Katie	14	75	105.5	-2	353	7.09	0.0201994	75	10530	0.00290598	NA	NA	NA	236000	0.00358974	NA	8.11	0.0231054	NA	19	38	NA
64197_3	328	17weeks	Brown.Hood	Stephen	9	Katie	Katie	Katie	5	73	107.5	13	378	8.53	0.0218159	81	10807.5	0.00263427	1.945	273.135	NA	164781	0.00327366	0.455082	7.85	0.0200767	NA	22.5	40.5	NA
64198_3	334	17weeks	Brown	Stephen	3	Katie	Katie	Katie	9	48	58	2	284	4.64	0.0162238	86	11737.5	0.00398601	0.907	170.752	NA	153667	0.00335664	0.528512	3.93	0.0137413	NA	21	40	NA
64199_3	341	17weeks	Brown.Hood	Stephen	11	Katie	Katie	Katie	11	93	208.5	0	290	3.67	0.0126552	82	9667.5	0.00293103	1.112	248.13	NA	244629	0.00306897	0.510225	6.15	0.0212069	NA	19	36	NA
64199_4	341	17weeks	Albino	Stephen	12	Katie	Katie	Katie	12	88.5	121	3	317	5.11	0.0159688	88	12217.5	0.00275	1.445	294.03	NA	312429	0.002625	0.475206	6.76	0.021125	NA	20	38	NA
64199_5	341	17weeks	Brown.Hood	Stephen	14	Katie	Katie	Katie	6	101.5	165	1	344	5.59	0.0162029	88	11722.5	0.00304348	2.065	347.565	NA	252596	0.00272464	0.442595	7.33	0.0212464	NA	20	37.5	NA
64201_3	303	17weeks	Albino	Stephen	5	Leah	Leah	Katie	5	69	98	-11	363	6.9	0.0196023	76	8625	0.00289773	NA	NA	NA	242584	0.00321023	NA	8.92	0.0253409	NA	21	40	NA
64201_4	303	17weeks	Black.Hood	Stephen	6	Leah	Leah	Katie	6	65	96	-7	348	6.65	0.0195015	76	9090	0.00290323	NA	NA	NA	192875	0.00375367	NA	5.86	0.0171848	NA	22	40	NA
64205_3	310	17weeks	Brown	Stephen	11	Katie	Katie	Katie	15	96.5	95.5	3	307	2.76	0.00890323	81	10957.5	0.00354839	0.744	139.065	NA	115767	0.00387097	0.561779	4.73	0.0152581	NA	19	37	NA
64205_4	310	17weeks	Brown.Hood	Stephen	12	Katie	Katie	Katie	16	71	72	5	280	2.96	0.010386	71	11235	0.00680702	1.171	208.627	NA	166571	0.00294737	0.520883	4.78	0.0167719	NA	21	38	NA
64207_3	343	17weeks	Black.Hood	Stephen	3	Leah	Leah	Katie	3	76.5	92.5	-1	223	1.91	0.0086036	74	8475	0.00355856	NA	NA	NA	231830	0.00423423	NA	1.26	0.00567568	NA	17	35	NA
64207_4	343	17weeks	Black.Hood	Stephen	4	Leah	Leah	Katie	4	80.5	151.5	3	302	3.82	0.0125246	77	11077.5	0.00337705	NA	NA	NA	191522	0.00439344	NA	4.33	0.0141967	NA	19	37	NA
64213_3	307	17weeks	Albino	Stephen	1	Katie	Katie	Katie	1	102	79	0	401	5.35	0.0133416	82	10620	0.00261845	1.403	344.197	NA	216224	0.00266833	0.485232	6.97	0.0173815	NA	22	40.5	NA
64213_4	307	17weeks	Black.Hood	Stephen	2	Katie	Katie	Katie	2	88	134.5	10	380	5.76	0.0147692	92	10395	0.00266667	1.394	330.817	NA	127220	0.00315385	0.474372	7.39	0.0189487	NA	20	38	NA
64214_3	308	17weeks	Black	Stephen	9	Leah	Leah	Katie	9	75	125.5	3	377	5.39	0.0141842	84	12277.5	0.00307895	NA	NA	NA	254364	0.00289474	NA	7.88	0.0207368	NA	21	39	NA
64214_4	308	17weeks	Brown	Stephen	10	Leah	Leah	Katie	10	80.5	118	13	309	4.05	0.0125776	78	9562.5	0.00263975	NA	NA	NA	238903	0.00350932	NA	5.23	0.0162422	NA	20	38	NA
64215_3	314	17weeks	Black.Hood	Stephen	3	Katie	Katie	Katie	3	84	101	2	369	4.37	0.011779	89	10987.5	0.00272237	0.805	246.435	NA	129345	0.00312668	0.53903	4.68	0.0126146	NA	21	41.5	NA
64215_4	314	17weeks	Black.Hood	Stephen	4	Katie	Katie	Katie	4	76	89	15	317	4.47	0.0134639	79	10545	0.0028012	2.192	331.905	NA	156077	0.00313253	0.446734	3.69	0.0111145	NA	20	37.5	NA
64216_3	316	17weeks	Black	Stephen	5	Katie	Katie	Katie	5	74.5	95	9	346	4.55	0.0128169	81	9885	0.00276056	1.296	192.803	NA	126419	0.00349296	0.494783	4.76	0.0134085	NA	20	39.5	NA
64216_4	316	17weeks	Brown.Hood	Stephen	6	Katie	Katie	Katie	6	70.5	84	11	385	3.6	0.00909091	71	9832.5	0.0029798	1.146	219.593	NA	124504	0.00340909	0.523439	5.91	0.0149242	NA	21	39	NA
64220_3	332	17weeks	Albino	Stephen	11	Leah	Leah	Katie	11	61.5	51.5	-1	342	4.1	0.0120235	83	10740	0.00293255	NA	NA	NA	243101	0.00260997	NA	4.33	0.0126979	NA	20	38.5	NA
64220_4	332	17weeks	Albino	Stephen	12	Leah	Leah	Katie	12	73	117.5	6	384	7.05	0.0180769	85	11377.5	0.00289744	NA	NA	NA	213391	0.00294872	NA	6.91	0.0177179	NA	20	37.5	NA
64221_3	335	17weeks	Black.Hood	Stephen	7	Leah	Leah	Katie	7	79	155	3	321	4.79	0.014784	87	11325	0.00305556	NA	NA	NA	346182	0.00339506	NA	5.26	0.0162346	NA	20	40	NA
64221_4	335	17weeks	Black.Hood	Stephen	8	Leah	Leah	Katie	8	74	186.5	2	307	3.81	0.0123301	78	10665	0.00420712	NA	NA	NA	463565	0.00297735	NA	4.99	0.0161489	NA	19	39.5	NA
64226_4	309	17weeks	Black	Stephen	7	Katie	Katie	Katie	7	92	61	0	329	3.41	0.0103647	84	10440	0.00297872	1.448	208.417	NA	142973	0.00343465	0.479605	8.08	0.0245593	NA	19	36	NA
64227_3	312	17weeks	Black.Hood	Stephen	8	Katie	Katie	Katie	8	92.5	90.5	5	343	4.22	0.0121264	70	9592.5	0.00353448	1.242	233.393	NA	121094	0.00304598	0.515671	7.21	0.0207184	NA	21	38	NA
64230_3	331	17weeks	Black.Hood	Stephen	1	Katie	Katie	Katie	1	80	101.5	8	351	5.44	0.0151532	87	9540	0.00295265	0.89	305.152	NA	132215	0.00362117	0.529406	5.23	0.0145682	NA	19	37.5	NA
64230_4	331	17weeks	Black.Hood	Stephen	2	Katie	Katie	Katie	2	60	55.5	3	318	3.95	0.0123053	83	10942.5	0.00314642	0.778	168.945	NA	70881	0.00445483	0.552469	3.78	0.0117757	NA	20	38.5	NA
64230_5	331	17weeks	Black.Hood	Stephen	3	Katie	Katie	Katie	3	75	52	2	317	3.86	0.0121003	82	9382.5	0.00310345	1.136	230.827	NA	76424	0.00473354	0.507822	3.51	0.0110031	NA	20.5	39	NA
64230_6	331	17weeks	Black.Hood	Stephen	4	Katie	Katie	Katie	4	79	67.5	4	320	3.7	0.0114198	83	12127.5	0.00320988	1.215	251.632	NA	106713	0.00354938	0.499088	5.04	0.0155556	NA	19.5	37	NA
64231_3	338	17weeks	Black.Hood	Stephen	10	Katie	Katie	Katie	10	104.5	439.5	3	430	8.22	0.0189838	87	10425	0.00279446	4.197	598.702	NA	291096	0.00265589	0.39025	9.54	0.0220323	NA	22	41	NA
64231_4	338	17weeks	Black.Hood	Stephen	11	Katie	Katie	Katie	11	104	119	6	354	5.31	0.01475	76	7777.5	0.00330556	1.92	369.87	NA	230634	0.00341667	0.462083	7.24	0.0201111	NA	22	41.5	NA
64234_3	305	17weeks	Black.Hood	Stephen	5	Katie	Katie	Katie	5	91.5	94.5	9	264	2.11	0.00772894	76	10485	0.00285714	1.028	137.407	NA	69187	0.00333333	0.528316	3.18	0.0116484	NA	21	38.5	NA
64234_4	305	17weeks	Albino	Stephen	6	Katie	Katie	Katie	6	27.5	132	5	254	3.32	0.0128185	84	10410	0.0027027	1.122	218.82	NA	115957	0.00359073	0.506516	2.61	0.0100772	NA	18	34	NA
64234_5	305	17weeks	Black.Hood	Stephen	7	Katie	Katie	Katie	7	28	90.5	9	253	2.54	0.00969466	73	9712.5	0.00274809	1.058	179.475	NA	67967	0.00458015	0.529715	2.49	0.00950382	NA	18	35	NA
64235_3	311	17weeks	Brown.Hood	Stephen	8	Katie	Katie	Katie	8	74.5	111	17	344	4.93	0.0136565	79	9187.5	0.003241	1.337	213.9	NA	127769	0.0033518	0.49413	6.6	0.0182825	NA	21	38.5	NA
64235_4	311	17weeks	Black.Hood	Stephen	9	Katie	Katie	Katie	9	100.5	92	10	300	2.72	0.00877419	85	11422.5	0.00345161	1.354	166.357	NA	112846	0.00396774	0.485193	4.64	0.0149677	NA	18	36	NA
64235_5	311	17weeks	Brown.Hood	Stephen	10	Katie	Katie	Katie	10	83	84.5	6	334	3.3	0.00970588	79	9915	0.00352941	1.06	207.03	NA	157815	0.0035	0.520039	5.35	0.0157353	NA	22	39	NA
64238_3	326	17weeks	Brown	Stephen	11	Katie	Katie	Katie	11	82	76.5	2	358	3.91	0.0108611	87	10065	0.00302778	1.884	269.512	NA	106977	0.00358333	0.451549	5.01	0.0139167	NA	21	40	NA
64238_4	326	17weeks	Black.Hood	Stephen	12	Katie	Katie	Katie	12	63.5	66	-2	309	1.96	0.00638436	86	9060	0.0032899	1.895	230.88	NA	94826	0.00299674	0.452058	4.27	0.0139088	NA	19	39	NA
64240_3	334	17weeks	Black	Stephen	1	Katie	Katie	Katie	1	79.5	136	0	284	3.63	0.0127817	80	8970	0.00334507	1.244	214.71	NA	118579	0.00376761	0.500523	3.96	0.0139437	NA	20	39	NA
64240_4	334	17weeks	Brown	Stephen	2	Katie	Katie	Katie	2	60	60	-4	289	3.62	0.0127018	73	10672.5	0.00270175	0.284	182.648	NA	138131	0.00375439	0.759508	4.18	0.0146667	NA	20	39	NA
64244_3	320	17weeks	Brown.Hood	Stephen	1	Katie	Katie	Katie	1	63	60	-4	291	3.38	0.011777	93	10035	0.00317073	1.177	193.822	NA	92473	0.00324042	0.490374	2.78	0.00968641	NA	19.5	37.5	NA
64244_4	320	17weeks	Brown.Hood	Stephen	2	Katie	Katie	Katie	2	65	78.5	-12	266	2.97	0.0116929	87	8977.5	0.0034252	0.945	192.48	NA	219243	0.00291339	0.522207	3.17	0.0124803	NA	19	36	NA
64246_3	322	17weeks	Black.Hood	Stephen	3	Katie	Katie	Katie	3	76	138	-2	309	4.35	0.0141694	79	11115	0.00400651	1.952	409.74	NA	166615	0.00338762	0.457016	4.25	0.0138436	NA	19	37	NA
64246_4	322	17weeks	Black.Hood	Stephen	4	Katie	Katie	Katie	4	71.5	93	6	273	4.29	0.0153763	88	10312.5	0.00297491	1.859	267.743	NA	116356	0.00322581	0.45172	3.75	0.0134409	NA	19	36	NA
64246_5	322	17weeks	Black.Hood	Stephen	5	Katie	Katie	Katie	5	75.5	87.5	4	280	3.73	0.0131338	83	13680	0.00338028	1.712	524.288	NA	211640	0.0031338	0.464558	4.49	0.0158099	NA	20	35	NA
64246_6	322	17weeks	Black.Hood	Stephen	6	Katie	Katie	Katie	6	79	134	2	260	3.44	0.0131298	86	11055	0.00339695	1.618	329.535	NA	129922	0.00293893	0.466532	3.38	0.0129008	NA	18	34	NA
64247_3	324	17weeks	Brown	Stephen	3	Katie	Katie	Katie	3	88	90.5	17	373	4.89	0.0125385	77	10282.5	0.003	1.2	276.795	NA	132207	0.00346154	0.508732	9.62	0.0246667	NA	22	41	NA
64247_4	324	17weeks	Brown.Hood	Stephen	4	Katie	Katie	Katie	4	66	123.5	13	402	6.91	0.0166506	84	10267.5	0.00291566	2.367	551.663	NA	149451	0.00245783	0.435071	8.08	0.0194699	NA	21	40.5	NA
64248_3	329	17weeks	Black	Stephen	9	Katie	Katie	Katie	9	86.5	191	16	340	3.93	0.0110393	83	13125	0.00314607	1.95	302.603	NA	120286	0.00275281	0.45267	5.33	0.0149719	NA	21	38.5	NA
64248_4	329	17weeks	Black	Stephen	10	Katie	Katie	Katie	10	84.5	115.5	9	362	4.41	0.0118868	88	9817.5	0.00309973	2.168	446.655	NA	113308	0.0028841	0.438492	5.7	0.0153639	NA	21	40	NA
64249_3	310	17weeks	Brown	Stephen	7	Katie	Katie	Katie	7	101	109.5	3	334	3.35	0.00994065	82	12555	0.00367953	0.95	264.855	NA	96000	0.00335312	0.52867	5.44	0.0161424	NA	21	38.5	NA
64249_4	310	17weeks	Brown.Hood	Stephen	8	Katie	Katie	Katie	8	91.5	133.5	2	378	3.45	0.00907895	86	11565	0.00376316	1.366	306.735	NA	79034	0.00381579	0.483104	5.87	0.0154474	NA	22	38.5	NA
64251_3	339	17weeks	Brown.Hood	Stephen	11	Katie	Katie	Katie	11	104	74	1	342	4.11	0.0119825	88	11497.5	0.00265306	1.122	338.392	NA	167362	0.00274052	0.501385	3.53	0.0102915	NA	21	38	NA
64251_4	339	17weeks	Black.Hood	Stephen	12	Katie	Katie	Katie	12	95.5	171	10	398	7.21	0.0176716	92	12892.5	0.00272059	2.452	804.24	NA	205638	0.00311275	0.424934	8.01	0.0196324	NA	22	39	NA
64257_3	302	17weeks	Black	Stephen	5	Katie	Katie	Katie	5	74.5	220	0	370	8.15	0.022027	82	12817.5	0.00245946	1.52	241.17	NA	207009	0.00305405	0.477177	6.36	0.0171892	NA	20	40	NA
64257_4	302	17weeks	Albino	Stephen	6	Katie	Katie	Katie	6	70.5	194.5	-8	329	8.35	0.0260125	83	9742.5	0.00286604	1.768	324.233	NA	147798	0.00308411	0.461561	5.53	0.0172274	NA	21	37.5	NA
64258_3	306	17weeks	Brown.Hood	Stephen	7	Katie	Katie	Katie	7	66	67.5	12	312	2.76	0.00851852	76	10447.5	0.00305556	0.849	148.965	NA	69081	0.00342593	0.552571	3.3	0.0101852	NA	20	39	NA
64258_4	306	17weeks	Albino	Stephen	8	Katie	Katie	Katie	8	55	100.5	14	404	7.08	0.0169378	88	9585	0.00296651	1.23	249.518	NA	148727	0.00289474	0.491548	8.04	0.0192344	NA	23	42	NA
64260_3	314	17weeks	Black.Hood	Stephen	1	Katie	Katie	Katie	1	99	156	5	307	4.39	0.0140705	87	11812.5	0.00294872	2.233	371.212	NA	186933	0.00336538	0.436985	8.64	0.0276923	NA	18	35	NA
64260_4	314	17weeks	Black.Hood	Stephen	2	Katie	Katie	Katie	2	75	93.5	12	325	4.52	0.0134125	80	11932.5	0.00287834	1.74	491.168	NA	138569	0.00323442	0.466496	5.4	0.0160237	NA	21	39	NA
64262_3	318	17weeks	Albino	Stephen	9	Katie	Katie	Katie	9	82.5	101.5	1	333	5.78	0.0173054	80	10297.5	0.00269461	1.592	217.425	NA	124484	0.00371257	0.475052	4.61	0.0138024	NA	22	40.5	NA
64262_4	318	17weeks	Black	Stephen	10	Katie	Katie	Katie	10	125	96.5	-3	348	5.12	0.0148406	80	10335	0.00315942	1.522	265.072	NA	125096	0.00391304	0.4795	4.4	0.0127536	NA	20	38	NA
64267_3	342	17weeks	Black.Hood	Stephen	11	Katie	Katie	Katie	11	93.5	76	8	307	4.77	0.0151429	86	9120	0.00244444	1.338	228.03	NA	121302	0.004	0.485212	5.49	0.0174286	NA	20	36	NA
64293_3	300	17weeks	Albino	Stephen	3	Leah	Leah	Katie	3	64.5	62.5	5	354	5.27	0.0146797	66	9037.5	0.00295265	1.166	181.838	NA	142118	0.00331476	0.530155	3.46	0.00963788	NA	21	40	NA
64294_3	305	17weeks	Albino	Stephen	5	Katie	Katie	Katie	5	72	66	-1	293	3.17	0.0108562	78	10417.5	0.00297945	1.763	244.995	NA	140943	0.00363014	0.467651	3.45	0.0118151	NA	20	38	NA
64294_4	305	17weeks	Black.Hood	Stephen	6	Katie	Katie	Katie	6	65	75.5	10	282	3.07	0.0105137	80	12982.5	0.00304795	1.085	239.542	NA	171023	0.00294521	0.515858	7.11	0.0243493	NA	18.5	36	NA
64295_3	309	17weeks	Brown	Stephen	1	Leah	Leah	Katie	1	98	152	8	363	5.72	0.0154178	85	12795	0.00326146	1.998	384.233	NA	197486	0.00283019	0.448428	9.23	0.0248787	NA	21	37.5	NA
64295_4	309	17weeks	Brown.Hood	Stephen	2	Leah	Leah	Katie	2	97.5	71	8	359	3.69	0.0100545	80	11572.5	0.00318801	1.188	404.46	NA	170915	0.00351499	0.505585	5.67	0.0154496	NA	23	39	NA
64297_3	317	17weeks	Black	Stephen	7	Katie	Katie	Katie	7	90	64	4	337	4.78	0.0140176	76	9277.5	0.00281525	1.996	335.663	NA	160697	0.00319648	0.458511	5.09	0.0149267	NA	22	40	NA
64297_4	317	17weeks	Brown	Stephen	8	Katie	Katie	Katie	8	67.5	58.5	17	306	3.92	0.0121362	73	10897.5	0.0026935	1.69	414.765	NA	105216	0.00315789	0.478192	4.5	0.0139319	NA	18	36	NA
64297_5	317	17weeks	Black	Stephen	9	Katie	Katie	Katie	9	68	70	11	320	3.96	0.0119637	81	9487.5	0.00271903	1.271	196.822	NA	132800	0.00332326	0.496862	4.35	0.013142	NA	20	37	NA
64297_6	317	17weeks	Black.Hood	Stephen	10	Katie	Katie	Katie	10	68	69	7	357	3.9	0.0107143	78	9765	0.00296703	1.172	243.653	NA	161899	0.00271978	0.509938	5.73	0.0157418	NA	22	40	NA
64299_3	325	17weeks	Black.Hood	Stephen	3	Katie	Katie	Katie	3	91.5	161	19	353	8.03	0.021586	91	11542.5	0.00327957	2.155	489.158	NA	377915	0.0019086	0.436207	8.35	0.0224462	NA	22	40	NA
64299_4	325	17weeks	Black.Hood	Stephen	4	Katie	Katie	Katie	4	109	116	11	349	5.87	0.0163056	89	10447.5	0.00313889	2.082	463.08	NA	194467	0.00333333	0.440942	6.93	0.01925	NA	21	40	NA
64300_1	327	17weeks	Brown.Hood	Stephen	4	Leah	Leah	Katie	4	71.5	75.5	4	339	5.22	0.0152187	74	10597.5	0.00311953	1.329	427.223	NA	168928	0.00364431	0.501817	7.21	0.0210204	NA	21	39	NA
64300_2	327	17weeks	Black.Hood	Stephen	5	Leah	Leah	Katie	5	75	115.5	0	310	5.28	0.0170323	76	10830	0.00293548	1.048	349.358	NA	230051	0.00251613	0.525991	6.12	0.0197419	NA	19.5	38	NA
64300_3	327	17weeks	Brown.Hood	Stephen	6	Leah	Leah	Katie	6	80.5	122	0	369	4.58	0.0124119	82	11490	0.00306233	0.795	204.097	NA	182250	0.00260163	0.551213	6.33	0.0171545	NA	22	41	NA
64302_3	338	17weeks	Black.Hood	Stephen	11	Katie	Katie	Katie	11	78	133	14	390	5.04	0.0124752	93	11865	0.0030198	1.321	280.845	NA	400432	0.00183168	0.47861	6.88	0.0170297	NA	21	39	NA
64302_4	338	17weeks	Black.Hood	Stephen	12	Katie	Katie	Katie	12	77.5	158.5	-11	404	5.83	0.0148346	82	9240	0.00361323	1.755	409.53	NA	226387	0.00302799	0.463372	7.32	0.018626	NA	21	39	NA
64304_1	322	17weeks	Black.Hood	Stephen	7	Leah	Leah	Katie	7	84	125	3	301	4.22	0.0138816	71	11265	0.00503289	1.354	295.702	NA	203958	0.003125	0.504318	3.11	0.0102303	NA	21	39	NA
64304_2	322	17weeks	Black.Hood	Stephen	8	Leah	Leah	Katie	8	80.5	118.5	0	272	4.15	0.0152574	78	11647.5	0.00397059	1.404	341.13	NA	238500	0.00235294	0.490325	4.93	0.018125	NA	20	37	NA
64304_3	322	17weeks	Black.Hood	Stephen	9	Leah	Leah	Katie	9	77	119.5	2	280	4.72	0.0167376	81	11580	0.00329787	1.877	337.905	NA	257014	0.00251773	0.458306	5.28	0.0187234	NA	21	36	NA
64305_3	339	17weeks	Black.Hood	Katie	1	Leah	Leah	Katie	1	118.5	212	3	346	6.59	0.0188825	82	11302.5	0.00295129	1.204	270.863	NA	144387	0.00355301	0.501394	7.7	0.022063	NA	20	37	NA
64305_4	339	17weeks	Brown.Hood	Katie	2	Leah	Leah	Katie	2	82	111	5	347	3.71	0.0105398	85	11407.5	0.00247159	0.794	220.583	NA	107000	0.00329545	0.546675	4.82	0.0136932	NA	20	38	NA
64305_5	339	17weeks	Black.Hood	Katie	3	Leah	Leah	Katie	3	91.5	69.5	-1	323	3.64	0.0113043	88	11070	0.00341615	0.957	229.35	NA	197010	0.00319876	0.519374	4.92	0.0152795	NA	20	37	NA
64305_6	339	17weeks	Brown.Hood	Katie	4	Leah	Leah	Katie	4	85	98	6	296	3.03	0.0100331	82	11842.5	0.00301325	0.367	133.838	NA	88835	0.00380795	0.67637	3.04	0.0100662	NA	19	36	NA
64305_7	339	17weeks	Black.Hood	Katie	5	Leah	Leah	Katie	5	80.5	60	1	333	4.23	0.0126647	80	NA	0.00317365	0.809	184.755	NA	104000	0.00377246	0.552169	5.68	0.017006	NA	21	39	NA
64313_3	343	17weeks	Black.Hood	Katie	6	Leah	Leah	Katie	6	86	228	8	433	12.34	0.0279819	87	NA	0.00315193	2.139	561.18	NA	204444	0.00265306	0.440581	8.99	0.0203855	NA	23	40	NA
64313_4	343	17weeks	Black.Hood	Katie	7	Leah	Leah	Katie	7	102	135.5	4	374	5.9	0.0156085	99	NA	0.00275132	1.221	261.277	NA	145971	0.0037037	0.480226	5.99	0.0158466	NA	23	41	NA
64313_5	343	17weeks	Black.Hood	Katie	8	Leah	Leah	Katie	8	79.5	81.5	8	365	5.34	0.0143164	88	NA	0.00313673	0.817	212.542	NA	142571	0.00375335	0.538589	4.97	0.0133244	NA	22	40	NA

## Sheet: Supp.Table3.h2_corr_table
Supplement Table 3. Heritability (diagonal), genetic correlation (lower diagonal) and phenotypic (upper diagonal) correlations between physiological traits.
Within brackets are SE for heritabilities, and -log10(P value) for genetic and phenotypic correlation.
Dashes (-) indicate missing data for phenotypic correlations, where traits were measured on different animals.
	BW	BWGain	BLTail	BLNoTail	QUICKI	Ins0	InsAUC	Gluc0	GluAUC	CHOL	TRIG	WPIC	EpiFat	RetroFat	Pancreas	Heart	RigKid	LftKid	TotKid	EpiFat/BW	RetroFat/BW	Pancreas/BW	Heart/BW	RigKid/BW	LftKid/BW	TotKid/BW
BW	0.54 (0.04)	0.08 (1.98)	0.62 (118.68)	0.57 (99.89)	-0.26 (21.84)	0.24 (19.61)	0.33 (35.07)	0.16 (8.93)	0.21 (15.71)	0.25 (16.66)	0.17 (8.23)	0.07 (1.61)	0.63 (127.26)	0.64 (129.63)	0.32 (27.21)	0.61 (99.33)	0.71 (58.78)	0.67 (50.01)	0.73 (63.1)	0.36 (34.89)	0.39 (42.39)	-0.19 (10.35)	-0.2 (9.55)	-0.27 (7.16)	-0.26 (6.42)	-0.29 (8.15)
BWGain	0.24 (1.31)	0.18 (0.04)	0.03 (0.59)	0.08 (2.17)	-0.05 (0.93)	0.05 (0.96)	0.03 (0.56)	0.03 (0.53)	0.01 (0.13)	0.05 (0.89)	0.02 (0.27)	-0.02 (0.3)	0.07 (1.58)	0.1 (3.3)	0.09 (2.48)	0.07 (1.66)	-	-	-	-0.03 (0.47)	0.02 (0.4)	-0.04 (0.81)	-0.12 (3.76)	-	-	-
BLTail	0.74 (58.98)	-0.01 (0.04)	0.38 (0.04)	0.73 (189.27)	-0.17 (8.23)	0.17 (8.08)	0.2 (10.27)	0.05 (1.1)	0.03 (0.41)	0.12 (4.22)	0 (0.02)	0 (0.04)	0.36 (36.25)	0.33 (28.74)	0.35 (33.33)	0.43 (44.34)	-	-	-	0.18 (9.44)	0.16 (6.95)	0.03 (0.43)	-0.11 (3.3)	-	-	-
BLNoTail	0.88 (82.81)	-0.02 (0.05)	0.8 (53.17)	0.22 (0.04)	-0.22 (13.27)	0.22 (12.74)	0.27 (18.54)	0.07 (1.81)	0.08 (2.08)	0.15 (6.32)	0.06 (1.42)	0.04 (0.79)	0.41 (46.52)	0.41 (46.34)	0.27 (19.01)	0.36 (30.35)	-	-	-	0.25 (17.47)	0.27 (19.85)	-0.04 (0.64)	-0.12 (3.7)	-	-	-
QUICKI	-0.31 (3.56)	-0.01 (0.03)	-0.24 (1.65)	-0.36 (2.68)	0.32 (0.04)	-0.99 (Inf)	-0.71 (209.94)	-0.36 (43.51)	-0.16 (8.52)	-0.22 (12.56)	-0.32 (26.76)	-0.18 (7.97)	-0.41 (45.24)	-0.38 (39.45)	0.01 (0.13)	-0.21 (9.86)	-0.17 (0.42)	-0.11 (0.13)	-0.14 (0.23)	-0.38 (39.38)	-0.36 (33.76)	0.16 (7.05)	0.01 (0.17)	0.06 (2.06)	0.1 (2.15)	0.11 (2.86)
Ins0	0.3 (3.22)	0.03 (0.09)	0.25 (1.7)	0.37 (2.73)	-0.84 (101.26)	0.31 (0.04)	0.72 (220.96)	0.22 (15.98)	0.1 (3.45)	0.19 (9.8)	0.29 (22.58)	0.16 (6.44)	0.4 (43.66)	0.38 (38.04)	-0.01 (0.08)	0.2 (9.51)	0.17 (3.15)	0.11 (2.78)	0.13 (3.21)	0.38 (38.06)	0.35 (32.68)	-0.15 (6.46)	-0.01 (0.18)	-0.04 (0.46)	-0.08 (0.46)	-0.09 (0.55)
InsAUC	0.47 (8.41)	0.06 (0.18)	0.29 (2.2)	0.57 (6.88)	-0.84 (101.26)	0.85 (111.54)	0.29 (0.04)	0.15 (7.72)	0.2 (13.53)	0.26 (18.05)	0.28 (20.02)	0.19 (8.31)	0.47 (59.76)	0.48 (63.04)	0.1 (2.9)	0.23 (11.55)	0.2 (Inf)	0.15 (104.76)	0.18 (208.14)	0.42 (47.84)	0.44 (52.58)	-0.1 (2.95)	-0.08 (1.67)	-0.08 (13.99)	-0.11 (3.83)	-0.11 (8.42)
Gluc0	0.17 (1.4)	-0.07 (0.25)	0.03 (0.1)	0.06 (0.21)	-0.38 (4.51)	0.24 (1.73)	0.23 (1.54)	0.36 (0.04)	0.43 (68.84)	0.24 (15.09)	0.27 (19.5)	0.13 (4.25)	0.19 (9.77)	0.15 (6.6)	0.03 (0.42)	0.07 (1.52)	0.05 (104.76)	0.02 (Inf)	0.03 (205.3)	0.18 (8.93)	0.14 (5.36)	-0.04 (0.78)	-0.02 (0.21)	-0.14 (4.54)	-0.14 (20.66)	-0.17 (12.22)
GluAUC	0.28 (3.29)	-0.04 (0.12)	-0.06 (0.27)	-0.03 (0.09)	-0.24 (1.88)	0.16 (0.89)	0.16 (0.92)	0.66 (23.84)	0.36 (0.04)	0.16 (6.83)	0.13 (5.15)	0.12 (3.8)	0.19 (9.5)	0.15 (6.66)	-0.04 (0.79)	0.11 (3.4)	0.17 (208.14)	0.16 (205.3)	0.18 (Inf)	0.16 (6.96)	0.12 (4.29)	-0.13 (5.19)	-0.01 (0.08)	-0.05 (8.82)	-0.05 (10.2)	-0.06 (11.1)
CHOL	0.36 (4.9)	0.11 (0.39)	0.32 (2.96)	0.38 (3.3)	-0.16 (0.93)	0.15 (0.79)	0.3 (2.47)	0.14 (0.81)	0.15 (0.88)	0.44 (0.04)	0.12 (4.23)	0.08 (1.84)	0.3 (24.86)	0.36 (35.68)	0.11 (3.68)	0.12 (3.61)	-	-	-	0.27 (19.47)	0.34 (30.87)	-0.03 (0.49)	-0.12 (3.54)	-	-	-
TRIG	0.2 (1.64)	-0.14 (0.54)	0.01 (0.02)	0.14 (0.55)	-0.45 (6.35)	0.41 (4.91)	0.45 (5.31)	0.46 (7.03)	0.26 (2)	0.12 (0.65)	0.42 (0.04)	0.21 (10.4)	0.32 (27.57)	0.39 (40.77)	-0.01 (0.15)	0.1 (2.93)	-	-	-	0.31 (25.69)	0.4 (43.86)	-0.11 (3.47)	-0.02 (0.34)	-	-	-
WPIC	0.19 (1.16)	-0.09 (0.25)	0.08 (0.27)	0.21 (0.79)	-0.23 (1.19)	0.21 (1.02)	0.39 (2.94)	0.18 (0.92)	0.12 (0.47)	0.26 (1.55)	0.39 (3.26)	0.31 (0.05)	0.19 (8.84)	0.22 (11.24)	-0.33 (25.86)	0.05 (0.94)	-	-	-	0.21 (10.49)	0.24 (13.56)	-0.4 (38.91)	-0.02 (0.25)	-	-	-
EpiFat	0.66 (50.99)	-0.03 (0.11)	0.45 (8.16)	0.67 (17.83)	-0.54 (12.8)	0.55 (12.55)	0.73 (34.18)	0.23 (2.1)	0.22 (1.91)	0.34 (4.65)	0.42 (7.04)	0.44 (5.57)	0.58 (0.04)	0.68 (157.02)	0.14 (5.54)	0.27 (16.77)	-	-	-	0.94 (Inf)	0.58 (103.37)	-0.2 (10.57)	-0.27 (17.46)	-	-	-
RetroFat	0.71 (66.11)	0.06 (0.21)	0.46 (8.5)	0.72 (21.04)	-0.42 (6.65)	0.42 (6.59)	0.64 (22.06)	0.1 (0.59)	0.15 (1.05)	0.37 (5.68)	0.41 (6.65)	0.41 (4.86)	0.75 (93.71)	0.6 (0.04)	0.18 (8.6)	0.43 (43.49)	-	-	-	0.55 (92.01)	0.95 (Inf)	-0.17 (8.17)	-0.12 (3.61)	-	-	-
Pancreas	0.18 (1.54)	0.05 (0.15)	0.47 (8.28)	0.45 (4.84)	0.08 (0.39)	-0.09 (0.41)	0.1 (0.45)	0.01 (0.04)	-0.19 (1.38)	0.28 (2.74)	0.03 (0.12)	-0.51 (7.06)	0.02 (0.1)	0.25 (2.57)	0.48 (0.04)	0.29 (19.09)	-	-	-	0.02 (0.25)	0.09 (2.41)	0.85 (315.45)	-0.08 (1.85)	-	-	-
Heart	0.73 (65.09)	0.15 (0.58)	0.52 (10.44)	0.44 (4.52)	-0.23 (1.64)	0.24 (1.66)	0.27 (2.03)	0.08 (0.38)	0.12 (0.68)	0.19 (1.27)	0.19 (1.21)	0.05 (0.16)	0.3 (3.59)	0.51 (12.27)	0.51 (9.89)	0.54 (0.04)	-	-	-	0.06 (1.36)	0.28 (17.75)	-0.08 (2.01)	0.63 (107.35)	-	-	-
RigKid	0.9 (106.41)	0.44 (1.72)	0.55 (4.09)	0.64 (3.98)	-0.27 (1.01)	0.27 (0.99)	0.56 (4.18)	0.06 (0.15)	0.1 (0.28)	0.45 (2.15)	0.18 (0.5)	0.05 (0.1)	0.52 (4.4)	0.53 (4.57)	0.47 (2.94)	0.75 (13.41)	0.41 (0.06)	0.85 (104.76)	0.96 (208.14)	-	-	-	-	0.39 (13.99)	0.2 (3.83)	0.3 (8.42)
LftKid	0.81 (37.92)	0.42 (1.44)	0.49 (2.86)	0.49 (2.01)	-0.19 (0.56)	0.2 (0.58)	0.6 (4.63)	0.03 (0.08)	0.11 (0.32)	0.36 (1.35)	0.24 (0.73)	0.13 (0.27)	0.48 (3.49)	0.51 (4.24)	0.42 (2.24)	0.74 (11.6)	0.97 (Inf)	0.38 (0.07)	0.96 (205.3)	-	-	-	-	0.22 (4.54)	0.46 (20.66)	0.36 (12.22)
TotKid	0.85 (67.27)	0.4 (1.38)	0.52 (3.74)	0.56 (2.96)	-0.21 (0.72)	0.22 (0.74)	0.58 (4.65)	0.03 (0.08)	0.13 (0.42)	0.4 (1.77)	0.19 (0.57)	0.13 (0.29)	0.51 (4.42)	0.53 (5.29)	0.44 (2.65)	0.74 (13.63)	1 (Inf)	0.99 (Inf)	0.43 (0.07)	-	-	-	-	0.31 (8.82)	0.33 (10.2)	0.34 (11.1)
EpiFat/BW	0.4 (8.83)	-0.14 (0.63)	0.26 (2.49)	0.46 (5.74)	-0.51 (11.24)	0.52 (10.86)	0.68 (26.81)	0.24 (2.44)	0.2 (1.66)	0.29 (3.49)	0.44 (8.15)	0.44 (5.95)	0.95 (Inf)	0.63 (37.41)	-0.07 (0.4)	0.06 (0.29)	0.27 (1.18)	0.25 (1.04)	0.27 (1.28)	0.6 (0.04)	0.54 (85.2)	-0.17 (7.98)	-0.24 (13.52)	-	-	-
RetroFat/BW	0.49 (14.27)	-0.04 (0.14)	0.28 (2.72)	0.52 (7.15)	-0.39 (5.56)	0.39 (5.48)	0.6 (17.57)	0.1 (0.54)	0.12 (0.78)	0.34 (4.59)	0.46 (8.79)	0.43 (5.35)	0.67 (46.58)	0.96 (Inf)	0.22 (1.99)	0.33 (4.12)	0.32 (1.55)	0.34 (1.67)	0.36 (2.06)	0.62 (34.89)	0.58 (0.04)	-0.13 (5.04)	-0.06 (1.09)	-	-	-
Pancreas/BW	-0.37 (6.06)	-0.07 (0.23)	0.11 (0.58)	0.02 (0.05)	0.26 (2.12)	-0.27 (2.22)	-0.13 (0.7)	0 (0.01)	-0.26 (2.37)	0.11 (0.61)	-0.03 (0.11)	-0.7 (21.88)	-0.31 (4.14)	-0.12 (0.81)	0.86 (273.76)	-0.15 (0.82)	-0.31 (1.06)	-0.31 (1.01)	-0.32 (1.15)	-0.27 (3.28)	-0.03 (0.15)	0.51 (0.04)	0.07 (1.48)	-	-	-
Heart/BW	-0.18 (1.31)	-0.03 (0.09)	-0.16 (0.86)	-0.37 (2.95)	0.03 (0.11)	-0.04 (0.12)	-0.14 (0.66)	0.06 (0.25)	0 (0)	-0.12 (0.66)	0.09 (0.39)	-0.1 (0.41)	-0.33 (3.73)	-0.15 (0.96)	0.03 (0.12)	0.58 (17.37)	0.1 (0.26)	0.17 (0.5)	0.14 (0.41)	-0.31 (3.49)	-0.1 (0.54)	0.26 (2.06)	0.43 (0.05)	-	-	-
RigKid/BW	-0.33 (1.63)	0.1 (0.2)	0.09 (0.21)	-0.09 (0.17)	0.11 (0.29)	-0.02 (0.05)	-0.01 (0.02)	-0.47 (3.68)	-0.21 (0.77)	0.05 (0.1)	-0.63 (4.93)	-0.24 (0.63)	-0.1 (0.28)	-0.26 (0.98)	0.45 (2.75)	0.22 (0.85)	-0.17 (0.37)	-0.07 (0.12)	-0.12 (0.24)	-0.08 (0.23)	-0.31 (1.23)	0.55 (4.03)	0.29 (1.29)	0.32 (0.09)	0.71 (57.41)	0.91 (146.94)
LftKid/BW	-0.43 (2.62)	0.06 (0.1)	-0.01 (0.02)	-0.29 (0.83)	0.19 (0.64)	-0.1 (0.29)	0.05 (0.13)	-0.46 (3.67)	-0.16 (0.56)	-0.13 (0.33)	-0.47 (2.53)	-0.1 (0.2)	-0.15 (0.51)	-0.23 (0.83)	0.35 (1.76)	0.21 (0.8)	-0.18 (0.4)	-0.03 (0.05)	-0.09 (0.17)	-0.11 (0.33)	-0.22 (0.79)	0.5 (3.41)	0.36 (1.97)	0.96 (165.38)	0.37 (0.09)	0.93 (157.47)
TotKid/BW	-0.36 (2.31)	0.03 (0.06)	0.04 (0.11)	-0.18 (0.47)	0.16 (0.57)	-0.08 (0.22)	0.06 (0.16)	-0.48 (4.63)	-0.13 (0.48)	-0.06 (0.15)	-0.52 (3.8)	-0.06 (0.14)	-0.12 (0.43)	-0.19 (0.73)	0.38 (2.35)	0.25 (1.17)	-0.15 (0.33)	-0.01 (0.02)	-0.02 (0.04)	-0.09 (0.3)	-0.18 (0.71)	0.51 (4.02)	0.39 (2.61)	0.99 (Inf)	0.99 (Inf)	0.48 (0.09)

## Sheet: Supp.Table4.All_pQTLs
Supplement Table 4. All physiological QTLs (including fat pad weight traits not divided by sacBW) detected in SNP-based and haplotype-based method
Each row shows one pQTL. The strain distribution pattern (SDP) at the peak SNP of the eight founders uses the following order: ACI-BN-BUF-F344-M520-MR-WN-WKY.
In terms of mapping method, pQTL detected by SNP-based are in light yellow background, Haplotype-based are in white background
pQTLs that replicated those reported in[10] or [11] are indicated by * and # respectively
Physiological QTL information								Genotype of the founders at the Peak Marker
Phenotype	CHR	Peak marker	Start	End	Size	logP	Threshold	ACI	BN	BUF	F344	M520	MR	WN	WKY	Replicated
RigKid	1	chr1_115083916	115.03	115.211	0.181044	5.55626	5.31	T	T	C	C	C	T	C	C
TRIG	1	chr1_281420356	280.62	282.13	1.5	6.61	5.36	G	G	A	G	G	G	G	A
	1	chr1_280326480	279.593	281.448	1.85468	7.44091	5.18	C	C	C	C	C	T	C	C
EpiFat	1	chr1_281420356	280.62	282.13	1.5	7.14	5.26	G	G	A	G	G	G	G	A
	1	chr1_281392429	280.024	282.266	2.24175	6.68775	6.03	T	A	T	T	T	A	A	T
EpiFat/BW	1	chr1_281420356	280.62	282.13	1.5	6.57	5.42	G	G	A	G	G	G	G	A
RetroFat *#	1	chr1_281420356	280.62	282.13	1.5	8	5.39	G	G	A	G	G	G	G	A	* #
	1	chr1_281447925	278.938	282.655	3.71763	6.64359	5.39	G	C	G	G	G	C	C	G
RetroFat/BW *#	1	chr1_281420356	280.62	282.13	1.5	7.1	5.40	G	G	A	G	G	G	G	A	* #
	1	chr1_281378861	278.938	282.686	3.74802	5.4291	5.35	G	G	A	G	G	A	A	A
RetroFat	2	chr2_92372860	92.3496	92.5247	0.175166	6.23709	5.39	T	T	T	T	T	T	T	C
RetroFat/BW	2	chr2_92372860	92.3496	92.5016	0.152018	6.1142	5.35	T	T	T	T	T	T	T	C
LftKid/BW	2	chr2_181254773	180.782	181.316	0.534759	6.42236	5.69	G	T	T	T	T	T	T	G
Pancreas/BW	3	chr3_45709398	44.946	45.8275	0.881533	6.06587	5.34	G	C	C	C	G	C	C	C
RetroFat/BW #	3	chr3_95402825	92.3	98.31	6.01	5.65	5.40	G	G	G	G	A	G	A	G	#
TRIG	4	chr4_178497175	178.326	178.736	0.41003	6.13462	5.18	C	T	T	T	T	C	C	C
Heart/BW	5	chr5_98989187	98.9892	99.1812	0.192059	10.99	5.65	G	G	A	G	A	A	G	A
	5	chr5_99088483	98.8903	99.2005	0.310133	8.70418	5.65	C	C	A	C	A	A	C	A
	5	chr5_168350441	148.473	170.121	21.6474	7.93615	5.65	T	C	C	T	T	T	T	T
	5	chr5_161602249	158.994	170.048	11.0535	11.1617	5.65	T	C	C	T	C	C	C	C
BW	6	chr6_3528327	3.48333	3.72241	0.239075	5.68091	5.39	A	A	C	C	C	A	C	C
CHOL	6	chr6_29652195	29.47	31.22	1.76	7.34	5.38	C	C	C	C	T	C	C	T
	6	chr6_29615083	29.4521	31.5871	2.13498	7.10989	5.69	G	G	G	G	G	G	G	T
TRIG	6	chr6_27196786	27.2	27.78	0.59	6.18	5.36	T	T	C	T	T	T	T	C
	6	chr6_27196786	23.0288	28.3725	5.34364	6.24257	5.18	T	T	C	T	T	T	T	C
RetroFat *#	6	chr6_29615083	23.12	31.24	8.12	10.05	5.39	G	G	G	G	G	G	G	T	* #
	6	chr6_27196786	26.1069	29.6513	3.54433	10.3962	5.38	T	T	C	T	T	T	T	C
RetroFat/BW	6	chr6_29615083	23.12	31.24	8.12	10.48	5.40	G	G	G	G	G	G	G	T
	6	chr6_29615083	26.1069	29.6513	3.54433	9.81796	5.35	G	G	G	G	G	G	G	T
BWGain	7	chr7_42495997	40.02	44.07	4.05	5.36	5.32	T	C	C	C	T	C	C	T
BW	7	chr7_35933160	35.93	35.93	0	5.93	5.39	C	C	C	C	G	G	G	C
	7	chr7_35552320	35.5077	36.1953	0.687608	7.71931	5.39	T	C	T	T	C	C	T	T
CHOL	8	chr8_50803232	50.04	51.55	1.51	6.62	5.38	G	G	A	A	G	A	A	G
	8	chr8_50930198	50.0394	51.5482	1.50883	6.25027	5.69	C	C	T	T	T	T	T	C
TRIG	8	chr8_50033903	49.65	50.03	0.38	9.79	5.36	A	G	G	G	G	G	G	G
	8	chr8_50688095	49.9957	51.5482	1.55248	9.58017	5.18	C	C	G	G	C	G	G	G
BWGain	10	chr10_101864862	101.53	102.03	0.49	5.69	5.32	C	T	T	T	C	T	C	T
WPIC	10	chr10_100875066	100.687	102.516	1.82896	6.07742	5.14	T	T	A	T	T	T	T	A
EpiFat/BW	10	chr10_102451138	102.077	102.754	0.677639	5.98587	5.54	C	C	C	C	G	G	G	C
CHOL	12	chr12_36276781	34.48	36.91	2.43	5.47	5.38	C	C	A	A	C	C	C	C
BLTail #	12	chr12_4632329	0.7	6.49	5.79	5.42	5.36	T	G	T	G	G	G	G	T	#
RetroFat/BW	13	chr13_39553662	37.7419	43.7097	5.96776	5.78516	5.35	G	T	G	G	G	G	T	G
BLTail	14	chr14_19969820	19.94	24.13	4.19	7.09	5.36	C	G	G	C	C	C	G	C
	14	chr14_19729382	19.0626	20.0194	0.956776	6.17966	4.95	A	A	T	T	A	A	T	A
RetroFat	16	chr16_17476265	17.4564	17.5967	0.14022	6.36435	5.38	A	T	A	A	A	A	A	T
RetroFat/BW	16	chr16_17476265	10.1777	17.7845	7.6069	5.45025	5.35	A	T	A	A	A	A	A	T
BW	16	chr16_17470411	17.4564	17.5288	0.072375	6.12935	5.39	C	C	T	T	C	T	T	C
EpiFat	17	chr17_58601979	58.5783	58.8874	0.309087	6.0534	6.03	A	G	G	G	G	A	G	A
BW	19	chr19_52391237	51.87	54.4	2.53	7.67	5.39	A	A	A	G	G	G	A	A
	19	chr19_52379464	52.3195	52.5051	0.185556	8.33247	5.39	A	A	A	G	G	G	A	G
EpiFat	19	chr19_52391237	51.87	54.44	2.57	5.88	5.26	A	A	A	G	G	G	A	A
BLNoTail	19	chr19_52391237	51.87	54.44	2.57	6.14	5.40	A	A	A	G	G	G	A	A
TotKid/BW	20	chr20_5823811	5.81137	6.27997	0.468602	5.28583	5.09	G	G	C	C	C	C	C	C
EpiFat/BW	20	chr20_7957438	7.28	8.08	0.79	6.18	5.42	C	C	C	C	C	C	C	T
	20	chr20_5533215	5.40898	7.66663	2.25766	6.27545	5.54	A	A	C	A	C	A	A	A
WPIC	20	chr20_32707737	31.43	32.83	1.4	5.54	5.28	G	T	T	T	T	G	T	G
	20	chr20_32732941	32.5592	32.7355	0.176235	5.58607	5.14	G	G	G	G	G	C	G	C
EpiFat/BW	X	chrX_34392885	33.76	38.45	4.68	5.8	5.42	C	C	G	C	G	G	C	G
	X	chrX_35746165	34.8686	35.8237	0.955078	7.23417	5.54	C	C	C	T	C	T	C	C

## Sheet: Supp.Table5.Cis-eQTLs_Liver
Supplementary Table 5. Genes mapped with cis-eQTLs in Liver
	Cis-eQTL information							Gene information
Ensembl gene name	CHR	Left boundary (bp)	right boundary (bp)	interval (Mb)	maximum log P	minimum logP	Peak marker	Chr	Start	End	Gene name
ENSRNOG00000000024	4	168423565	169384424	0.960859	14.4342	9.58878	chr4_168914326	4	168903565	168933079	Hebp1
ENSRNOG00000000036	13	48892265	49496376	0.604111	6.72152	5.05765	chr13_49246128	13	49074644	49082729	Klhdc8a
ENSRNOG00000000040	13	72573892	73481897	0.908005	6.80762	5.10108	chr13_73242692	13	72861090	72893187	RGD1304622
ENSRNOG00000000043	14	1063799	2823146	1.75935	11.9917	7.15484	chr14_1081049	14	2042411	2056762	Idua
ENSRNOG00000000053	13	90843274	91847033	1.00376	6.36786	5.08582	chr13_91847033	13	91054974	91093713	Crp
ENSRNOG00000000068	13	109121254	110922945	1.80169	7.63577	5.25105	chr13_110112307	13	110033550	110077946	Ppp2r5a
ENSRNOG00000000073	14	1759392	2786574	1.02718	24.9657	20.0365	chr14_2229243	14	2613406	2633950	Tmed5
ENSRNOG00000000082	2	104832543	105821438	0.988895	18.4908	13.7035	chr2_105779329	2	104854572	104914173	Hltf
ENSRNOG00000000170	3	114326559	115802792	1.47623	7.7221	5.17792	chr3_114716934	3	114805922	114828154	Slc30a4
ENSRNOG00000000172	3	114070351	115505423	1.43507	47.3396	43.2979	chr3_114070351	3	114900343	114939370	Sqor
ENSRNOG00000000175	7	12085496	14030837	1.94534	9.55921	5.27544	chr7_13270323	7	13039781	13055632	Mier2
ENSRNOG00000000185	7	118855234	120199312	1.34408	10.517	6.54715	chr7_119485565	7	119626637	119631425	Mpst
ENSRNOG00000000187	7	118855234	119988364	1.13313	8.35195	5.00827	chr7_119406729	7	119554354	119568776	Csf2rb
ENSRNOG00000000201	8	85599356	86175321	0.575965	20.4843	16.1673	chr8_85778413	8	85553734	85565179	Gsta5
ENSRNOG00000000245	10	96900194	98100536	1.20034	7.52015	5.07155	chr10_97916630	10	97735548	97756521	Slc16a6
ENSRNOG00000000279	20	48884448	49359105	0.474657	58.2057	53.5434	chr20_48912592	20	48881194	48925081	Rtn4ip1
ENSRNOG00000000308	20	45455911	46408439	0.952528	5.83835	5.13431	chr20_45455911	20	46168177	46189806	Zbtb24
ENSRNOG00000000312	20	44976498	46420035	1.44354	15.0138	10.0711	chr20_46163086	20	45922806	46044738	Fig4
ENSRNOG00000000395	20	31879674	32782869	0.903195	10.232	5.50144	chr20_32739519	20	32191734	32211453	Kif1bp
ENSRNOG00000000408	20	33352684	33573658	0.220974	5.83086	5.57002	chr20_33573658	20	33471351	33521311	Gopc
ENSRNOG00000000431	20	3804493	5408848	1.60435	6.07701	5.08623	chr20_5408848	20	4414276	4422283	Atf6b
ENSRNOG00000000432	20	3980299	5129421	1.14912	5.30533	5.05435	chr20_4295725	20	4411876	4413366	Fkbpl
ENSRNOG00000000433	20	3807984	5181359	1.37338	5.87068	5.05739	chr20_4978545	20	4392626	4396250	Prrt1
ENSRNOG00000000442	20	3804493	4625341	0.820848	15.7265	10.8065	chr20_3992104	20	4329811	4353785	Notch4
ENSRNOG00000000454	20	3971783	4997904	1.02612	8.18155	5.01622	chr20_4960353	20	4020317	4026346	RT1-DOb
ENSRNOG00000000455	20	3797950	4582624	0.784674	11.205	6.20531	chr20_4138959	20	3995544	4009587	Tap2
ENSRNOG00000000456	20	3804737	4615133	0.810396	5.79672	5.00225	chr20_4615133	20	3990613	3993769	Psmb8
ENSRNOG00000000459	20	3968504	4212089	0.243585	5.41711	5.07275	chr20_4070448	20	3973420	3978845	Psmb9
ENSRNOG00000000470	20	4439260	5746246	1.30699	10.3486	5.55536	chr20_4453742	20	5432004	5441706	Vps52
ENSRNOG00000000471	20	4557631	5593673	1.03604	16.0472	11.0793	chr20_5445051	20	5446104	5447673	B3galt4
ENSRNOG00000000473	20	4557631	5526405	0.968774	7.67376	5.46228	chr20_4615133	20	5455974	5457444	Pfdn6
ENSRNOG00000000474	20	5429360	5526405	0.097045	6.48805	5.28509	chr20_5429360	20	5458509	5466265	Rgl2
ENSRNOG00000000477	20	4850859	5173589	0.32273	5.89252	5.00392	chr20_5173589	20	5480103	5485926	Daxx
ENSRNOG00000000478	20	5408787	5533215	0.124428	21.2143	17.3816	chr20_5429360	20	5486474	5499010	AA926063
ENSRNOG00000000490	20	6591892	7699089	1.1072	5.96282	5.01505	chr20_7214074	20	7215774	7219548	Rps10
ENSRNOG00000000493	20	7284029	8075954	0.791925	35.9439	31.8581	chr20_8075954	20	7409401	7427581	Snrpc
ENSRNOG00000000500	20	7146804	8089117	0.942313	15.5073	10.5428	chr20_7751361	20	7718282	7746331	Scube3
ENSRNOG00000000512	20	5982176	6917430	0.935254	22.0465	20.5404	chr20_6096213	20	5881462	5931648	Slc26a8
ENSRNOG00000000524	20	5982176	7905162	1.92299	9.90324	5.01392	chr20_6987069	20	6869767	6905194	RGD735065
ENSRNOG00000000525	20	5982176	7905162	1.92299	7.82694	5.04904	chr20_7414313	20	6923489	6932786	Pi16
ENSRNOG00000000531	20	8748482	9013886	0.265404	7.39935	6.39211	chr20_9013886	20	8369331	8384088	Ccdc167
ENSRNOG00000000542	20	9393171	10169241	0.77607	7.90554	5.04154	chr20_10057417	20	9313271	9560682	Dnah8
ENSRNOG00000000543	20	40618125	41134959	0.516834	6.05035	5.1132	chr20_41134959	20	41266566	41383424	Frk
ENSRNOG00000000552	20	31022857	32535576	1.51272	8.32125	5.11374	chr20_31670154	20	31456852	31598118	Col13a1
ENSRNOG00000000561	20	30642068	31286058	0.64399	13.3169	10.2287	chr20_31157524	20	30938901	30975472	Pald1
ENSRNOG00000000567	20	29351765	30459798	1.10803	11.1166	6.71198	chr20_30123664	20	30339673	30406295	Unc5b
ENSRNOG00000000568	20	29314568	30443277	1.12871	11.1963	6.28096	chr20_30123664	20	30287424	30327361	Slc29a3
ENSRNOG00000000576	20	29137988	29701475	0.563487	14.2061	9.30692	chr20_29358773	20	29544629	29558321	Anapc16
ENSRNOG00000000582	20	48644937	48768166	0.123229	13.8879	12.3844	chr20_48644937	20	48739639	48758905	Ddo
ENSRNOG00000000587	20	44749283	45673911	0.924628	5.66186	5.0459	chr20_45126862	20	45321405	45342948	Rpf2
ENSRNOG00000000595	20	43810824	45666444	1.85562	13.7191	8.82484	chr20_44440110	20	44680449	44722872	Traf3ip2
ENSRNOG00000000598	20	43810824	45226717	1.41589	11.2593	6.27698	chr20_44242215	20	44220840	44238830	Tube1
ENSRNOG00000000605	20	40212454	40383638	0.171184	39.1218	34.4382	chr20_40383638	20	40236437	40545494	Hs3st5
ENSRNOG00000000634	20	21323807	21619431	0.295624	6.00319	5.25659	chr20_21541586	20	21316826	21426034	Cabcoco1
ENSRNOG00000000641	20	22861019	23108485	0.247466	7.52155	5.98181	chr20_23108485	20	22728208	22746474	Nrbf2
ENSRNOG00000000664	12	49394909	50661101	1.26619	8.29925	5.28209	chr12_50648493	12	50343086	50383496	Tpst2
ENSRNOG00000000704	12	48490735	48836342	0.345607	6.09107	5.18094	chr12_48490735	12	48789261	48793553	Cmklr1
ENSRNOG00000000723	20	3892983	5751889	1.85891	20.6186	15.9944	chr20_5445051	20	4892702	4896991	RT1-CE5
ENSRNOG00000000728	20	231906	612969	0.381063	5.80435	5.05101	chr20_379153	20	295250	310380	Clic2
ENSRNOG00000000729	20	242135	1242990	1.00086	5.43763	5.0153	chr20_1242990	20	237506	284943	Tmlhe
ENSRNOG00000000748	20	649245	1617953	0.968708	6.14164	5.02851	chr20_1617953	20	844996	845493	AABR07044273.1
ENSRNOG00000000768	20	1050706	2343752	1.29305	32.4663	27.7503	chr20_1307586	20	1876173	1897814	Ubd
ENSRNOG00000000774	20	1050706	2565909	1.5152	8.03783	5.02389	chr20_2338237	20	1955359	1984863	Gabbr1
ENSRNOG00000000787	20	3234049	3680501	0.446452	17.7183	17.1768	chr20_3234049	20	3242470	3249189	AABR07044364.1
ENSRNOG00000000801	20	37298558	37727909	0.429351	15.8214	11.732	chr20_37540041	20	37587687	37589198	Msl3l2
ENSRNOG00000000802	20	37170420	38443732	1.27331	9.83408	5.02778	chr20_37196673	20	37465278	37700937	Tbc1d32
ENSRNOG00000000804	20	3234049	3680501	0.446452	26.0231	21.1262	chr20_3234049	20	3344870	3350927	Mrps18b
ENSRNOG00000000811	20	40611690	41134959	0.523269	27.605	22.6723	chr20_40651617	20	40618128	40712592	Pkib
ENSRNOG00000000815	20	40816023	41353909	0.537886	8.10675	5.35791	chr20_40816023	20	40778927	40800868	Smpdl3a
ENSRNOG00000000826	20	3234049	3680501	0.446452	13.8669	10.1526	chr20_3309447	20	3427880	3438396	Flot1
ENSRNOG00000000831	20	3123326	4557631	1.4343	8.76587	5.16654	chr20_3123326	20	3582742	3588375	Gtf2h4
ENSRNOG00000000847	20	4557631	5526405	0.968774	6.57976	5.23276	chr20_4557631	20	5106890	5113112	Csnk2b
ENSRNOG00000000854	20	4170305	5489273	1.31897	7.64318	5.21204	chr20_5072703	20	5170215	5175773	Ncr3
ENSRNOG00000000891	12	5610656	5729619	0.118963	18.461	14.5623	chr12_5676913	12	4737817	4741997	AABR07035107.1
ENSRNOG00000000913	12	29462762	30951867	1.4891	21.8477	17.4957	chr12_30109713	12	30198822	30227771	Gusb
ENSRNOG00000000920	12	30274895	31358068	1.08317	6.98001	5.1642	chr12_31031292	12	30450316	30464352	Phkg1
ENSRNOG00000000923	12	30478325	30684069	0.205744	33.9847	29.1638	chr12_30537614	12	30491416	30501860	Cct6a
ENSRNOG00000000925	12	30065218	31358068	1.29285	7.93449	5.06648	chr12_30586430	12	30514112	30526557	Psph
ENSRNOG00000000969	12	10258822	10922747	0.663925	20.6479	16.079	chr12_10525579	12	10636275	10684278	Cyp3a18
ENSRNOG00000000978	12	10674778	11685660	1.01088	16.5027	11.5812	chr12_11308523	12	11663683	11677830	AABR07035374.1
ENSRNOG00000000979	12	35981101	36906695	0.925594	8.38606	5.25922	chr12_36906695	12	36576020	36587839	Bri3bp
ENSRNOG00000000981	12	36326753	36906695	0.579942	7.95453	5.14168	chr12_36906695	12	36694960	36761455	Scarb1
ENSRNOG00000000985	12	11150829	11764504	0.613675	15.7635	10.9467	chr12_11213616	12	11199898	11215708	Cpsf4
ENSRNOG00000001005	12	1283462	3219807	1.93634	8.15882	5.26441	chr12_2942213	12	2233778	2245324	Fcer2
ENSRNOG00000001006	12	11148009	12081558	0.933549	16.7991	11.9285	chr12_12081558	12	12013911	12025549	Nptx2
ENSRNOG00000001033	15	57470220	58368398	0.898178	6.55036	5.32411	chr15_58202360	15	58170967	58201970	Nufip1
ENSRNOG00000001035	12	37067709	38442404	1.3747	8.30879	5.45943	chr12_38165178	12	37427546	37444282	Gtf2h3
ENSRNOG00000001050	12	12271806	12811000	0.539194	12.3032	9.28086	chr12_12577251	12	12748785	12782146	Eif2ak1
ENSRNOG00000001064	12	37402791	38374611	0.97182	7.38242	5.12113	chr12_37750390	12	37593874	37649036	Sbno1
ENSRNOG00000001079	12	12586581	13447941	0.86136	6.22918	5.19385	chr12_13447941	12	13113237	13157666	Daglb
ENSRNOG00000001086	12	38082343	38377153	0.29481	5.51779	5.04634	chr12_38377153	12	37984790	38023368	Vps37b
ENSRNOG00000001113	12	13828545	14554896	0.726351	10.3657	5.39087	chr12_14158502	12	14021727	14078134	Mmd2
ENSRNOG00000001114	12	13951104	14553243	0.602139	13.2794	8.33588	chr12_14217850	12	13969586	13998172	Wipi2
ENSRNOG00000001115	12	13951104	14553243	0.602139	25.8958	21.2895	chr12_14059277	12	13914114	13924531	Slc29a4
ENSRNOG00000001126	12	43076276	44955917	1.87964	9.74347	5.01637	chr12_44451653	12	44046217	44138138	Fbxw8
ENSRNOG00000001130	12	43536359	44679798	1.14344	11.1688	6.1932	chr12_43895968	12	44213943	44520341	Nos1
ENSRNOG00000001135	12	43992237	45140955	1.14872	7.10701	5.00973	chr12_44229056	12	44942443	44962656	Wsb2
ENSRNOG00000001159	20	9457507	9608362	0.150855	5.59649	5.48612	chr20_9555382	20	9850803	9855481	Tff3
ENSRNOG00000001169	20	9457507	10137858	0.680351	7.11298	5.10909	chr20_9457507	20	10032641	10087688	Slc37a1
ENSRNOG00000001171	12	46171348	47268304	1.09696	9.02712	5.72668	chr12_46431063	12	47078753	47095438	Coq5
ENSRNOG00000001172	12	46292855	47268304	0.975449	13.5985	8.90037	chr12_46486688	12	47103314	47138128	Rnf10
ENSRNOG00000001173	12	46292855	47268304	0.975449	8.63733	5.11719	chr12_46486688	12	47179664	47209784	Cabp1
ENSRNOG00000001182	20	10111874	10346816	0.234942	23.5308	20.1892	chr20_10346816	20	10265806	10275304	Ndufv3
ENSRNOG00000001201	20	10632349	11243225	0.610876	5.68439	5.11137	chr20_11243225	20	10966331	10968432	Cstb
ENSRNOG00000001212	20	10377835	12270634	1.8928	8.57362	5.1852	chr20_11393459	20	11344514	11359090	Dnmt3l
ENSRNOG00000001214	20	11202530	11801153	0.598623	32.8445	27.8893	chr20_11511270	20	11393877	11415882	Pfkl
ENSRNOG00000001215	20	10502116	11856691	1.35458	7.59823	5.04237	chr20_11447803	20	11417429	11424324	RGD1309594
ENSRNOG00000001216	20	11306358	11393459	0.087101	5.84194	5.5744	chr20_11393459	20	11436267	11482051	Trpm2
ENSRNOG00000001223	20	11447803	11785167	0.337364	25.4284	20.4697	chr20_11629022	20	11746370	11764233	Pttg1ip
ENSRNOG00000001232	20	12366683	13013192	0.646509	6.15956	5.12086	chr20_12379129	20	12334676	12352377	Slc19a1
ENSRNOG00000001239	20	13780667	14559787	0.77912	10.6997	5.95553	chr20_14540730	20	13827132	13831588	Ddt
ENSRNOG00000001242	20	12998972	14680661	1.68169	12.9018	8.01232	chr20_13853293	20	13817795	13825475	Gstt3
ENSRNOG00000001245	20	12368589	12579438	0.210849	6.35443	5.43251	chr20_12486171	20	12429315	12629981	Pcbp3
ENSRNOG00000001247	12	37883957	38853909	0.969952	8.07529	5.08845	chr12_38340101	12	38345456	38452652	Clip1
ENSRNOG00000001261	20	12801428	13295538	0.49411	6.13155	5.12711	chr20_12834273	20	12806957	12820466	Ftcd
ENSRNOG00000001273	12	16316835	17017524	0.700689	16.5004	13.0309	chr12_17017524	12	16899025	16901934	Psmg3
ENSRNOG00000001285	12	39084074	39459786	0.375712	5.5164	5.4443	chr12_39459786	12	39553903	39603326	Atp2a2
ENSRNOG00000001300	12	38754036	40237661	1.48362	6.50473	5.00816	chr12_40028746	12	39308025	39325673	P2rx4
ENSRNOG00000001309	12	39337439	39797540	0.460101	5.9021	5.5676	chr12_39797540	12	39253409	39302601	Camkk2
ENSRNOG00000001339	12	38338399	39459786	1.12139	13.1551	8.25993	chr12_38567842	12	38786540	38805121	Psmd9
ENSRNOG00000001342	12	37907503	38879444	0.971941	14.9312	10.1334	chr12_38853909	12	38709595	38782010	Wdr66
ENSRNOG00000001344	12	39574079	41306347	1.73227	14.6062	9.7401	chr12_41133057	12	40466495	40498752	Aldh2
ENSRNOG00000001376	7	141223467	142229310	1.00584	9.79905	5.06797	chr7_142229310	7	141973553	141981432	Mettl7a
ENSRNOG00000001383	12	41455421	41649622	0.194201	11.5414	8.21425	chr12_41618446	12	41566981	41590244	Slc8b1
ENSRNOG00000001389	12	21205086	22100284	0.895198	5.86623	5.4947	chr12_22083281	12	22122953	22125091	Irs3
ENSRNOG00000001404	12	21162028	22102480	0.940452	7.0481	5.33569	chr12_21220318	12	22082057	22118220	Agfg2
ENSRNOG00000001417	12	22308167	22843030	0.534863	15.1101	12.2868	chr12_22820298	12	22716423	22726982	Plod3
ENSRNOG00000001426	12	22843563	24409567	1.566	14.0412	9.09185	chr12_23101509	12	23514981	23535968	Prkrip1
ENSRNOG00000001435	12	23101509	24541778	1.44027	7.62176	5.26094	chr12_23302607	12	23752844	23762877	Ssc4d
ENSRNOG00000001436	12	23101509	24605991	1.50448	7.16219	5.01801	chr12_24409567	12	23789638	23817883	Ywhag
ENSRNOG00000001444	12	23579551	24409567	0.830016	6.32265	5.38657	chr12_24409567	12	24158766	24161869	Ccl26
ENSRNOG00000001453	12	24125353	24526122	0.400769	11.0882	6.98285	chr12_24252339	12	24478898	24537313	Baz1b
ENSRNOG00000001465	8	69069007	69083101	0.014094	7.41499	7.09078	chr8_69083101	8	69449801	69466618	Ids
ENSRNOG00000001466	1	257284922	259222533	1.93761	10.9334	6.60591	chr1_258778693	1	258210344	258252448	LOC100361492
ENSRNOG00000001493	1	77621397	78938776	1.31738	6.95301	5.42841	chr1_78639850	1	78015722	78023676	Kptn
ENSRNOG00000001531	14	114763326	115438145	0.674819	12.5968	7.60619	chr14_115438145	14	115383910	115391652	Chac2
ENSRNOG00000001555	11	15907769	17835700	1.92793	12.5647	7.59623	chr11_17532669	11	16873646	16889201	Btg3
ENSRNOG00000001557	11	16736451	17822172	1.08572	14.3124	10.2965	chr11_17435721	11	16826399	16873562	Cxadr
ENSRNOG00000001603	11	26211355	27168056	0.956701	16.9396	12.0868	chr11_27156485	11	27004320	27016941	N6amt1
ENSRNOG00000001628	11	37046077	37183491	0.137414	5.31144	5.16759	chr11_37046077	11	36851038	36912229	Pcp4
ENSRNOG00000001682	11	34533371	35733573	1.2002	19.7332	15.4387	chr11_35144175	11	34598492	34738791	Ttc3
ENSRNOG00000001686	11	33515514	35111313	1.5958	6.1097	5.03256	chr11_34969900	11	34352287	34526931	Hlcs
ENSRNOG00000001699	11	32824624	34718175	1.89355	7.36078	5.25818	chr11_33515514	11	33781870	33801999	Setd4
ENSRNOG00000001706	11	69970657	70306964	0.336307	7.61452	5.62633	chr11_69970657	11	69484293	70025633	Kalrn
ENSRNOG00000001709	11	84389212	84710911	0.321699	5.30026	5.08054	chr11_84710911	11	84041184	84047546	Ap2m1
ENSRNOG00000001711	11	74987946	75334110	0.346164	42.1006	38.8186	chr11_75213465	11	75125952	75144903	Hrasls
ENSRNOG00000001764	11	82344283	83615474	1.27119	21.3175	16.335	chr11_82344283	11	83105064	83300409	Vps8
ENSRNOG00000001806	11	80821646	81783970	0.962324	12.7415	8.43057	chr11_81783970	11	81648885	81660395	Fetub
ENSRNOG00000001825	11	87962169	89958765	1.9966	8.87064	5.04056	chr11_88849688	11	88912599	88972176	AABR07034767.1
ENSRNOG00000001827	11	79847963	80653599	0.805636	5.53971	5.01345	chr11_80581809	11	80736576	80803382	Masp1
ENSRNOG00000001834	11	88903266	90137636	1.23437	5.70079	5.11158	chr11_88903266	11	89277039	89282929	Mzt2b
ENSRNOG00000001842	4	181441240	181854227	0.412987	35.4746	31.1639	chr4_181441240	4	181434812	181465318	Mrps35
ENSRNOG00000001845	11	87428045	89286467	1.85842	20.529	15.5527	chr11_88802492	11	88346313	88374679	Top3b
ENSRNOG00000001864	11	87134418	88939077	1.80466	6.33886	5.06288	chr11_87851268	11	87975527	87977368	Tmem191c
ENSRNOG00000001889	11	86441266	86974914	0.533648	28.8641	24.607	chr11_86671735	11	86715981	86735622	Comt
ENSRNOG00000001890	11	86441266	86974914	0.533648	20.8954	17.4998	chr11_86671735	11	86667997	86716254	Txnrd2
ENSRNOG00000001891	11	85619974	86986472	1.3665	9.20629	5.32065	chr11_86605551	11	86577339	86655602	Gnb1l
ENSRNOG00000001915	11	16736451	17822172	1.08572	22.2664	17.403	chr11_17209033	11	17538063	17560296	Chodl
ENSRNOG00000001928	11	77284571	78035486	0.750915	8.18012	5.05989	chr11_77495243	11	77463954	77593207	Il1rap
ENSRNOG00000001930	11	75806980	77105183	1.2982	12.3031	7.77651	chr11_76322713	11	76747865	76804510	Ccdc50
ENSRNOG00000001957	14	21102132	22996989	1.89486	25.921	21.3173	chr14_21102132	14	22072024	22089248	Sult1e1
ENSRNOG00000001958	11	52806412	54321677	1.51527	6.4342	5.03525	chr11_53094069	11	53664638	53731779	Ift57
ENSRNOG00000001960	14	21102132	23098076	1.99594	8.66076	5.35113	chr14_22485043	14	22091777	22126021	Sult1d1
ENSRNOG00000001963	11	37512091	38067305	0.555214	9.31717	5.09129	chr11_38038974	11	38035450	38059950	Mx2
ENSRNOG00000001964	11	52528491	54416598	1.88811	19.2549	14.2561	chr11_54321677	11	53514595	53575175	Cd47
ENSRNOG00000001967	14	22621181	23098076	0.476895	5.06359	5.02954	chr14_22621181	14	22142364	22155231	Sult1b1
ENSRNOG00000001973	14	21221282	23403942	2.18266	13.7242	8.84026	chr14_21550924	14	22192970	22619968	Ugt2a3
ENSRNOG00000001980	14	23222742	23409588	0.186846	5.54888	5.03859	chr14_23409588	14	22553650	22591461	Ugt2b35
ENSRNOG00000002013	11	61346693	61557470	0.210777	7.35402	6.01908	chr11_61452234	11	61321459	61417842	Sidt1
ENSRNOG00000002061	14	7123155	7981361	0.858206	5.81175	5.07753	chr14_7860776	14	7688551	7863664	Ptpn13
ENSRNOG00000002072	11	30140398	32072319	1.93192	8.54475	5.02332	chr11_31635496	11	31002451	31075809	Eva1c
ENSRNOG00000002079	14	7137976	8167227	1.02925	8.40978	5.29041	chr14_7137976	14	8080275	8368254	Mapk10
ENSRNOG00000002080	11	30140398	31953881	1.81348	13.1169	8.47387	chr11_31683134	11	30916730	30977483	Urb1
ENSRNOG00000002085	14	32926161	34221661	1.2955	10.8025	5.82377	chr14_33425183	14	33389513	33430956	Thegl
ENSRNOG00000002097	14	36157392	36751617	0.594225	8.56588	5.4703	chr14_36405704	14	36550340	36554580	Rasl11b
ENSRNOG00000002121	14	5138636	6095109	0.956473	5.40504	5.09656	chr14_5138636	14	5086054	5101177	Lrrc8d
ENSRNOG00000002128	14	33316723	34264245	0.947522	7.6998	5.05592	chr14_33739401	14	33580541	33614919	Ppat
ENSRNOG00000002137	14	33043033	34221661	1.17863	10.8846	5.897	chr14_34094891	14	33624390	33647180	Aasdh
ENSRNOG00000002139	14	33376732	34208164	0.831432	8.01862	5.12967	chr14_33620982	14	33649637	33677031	RGD1311575
ENSRNOG00000002141	11	60769925	60788736	0.018811	5.01896	5.00121	chr11_60788736	11	60371684	60403196	Cd200
ENSRNOG00000002159	14	9573800	10527844	0.954044	16.0355	11.1229	chr14_9906848	14	10343282	10395047	Gpat3
ENSRNOG00000002176	11	56950777	58054103	1.10333	15.927	11.8319	chr11_58054103	11	57897879	57993548	Nectin3
ENSRNOG00000002187	11	69130790	69692170	0.56138	6.78746	5.00562	chr11_69692170	11	69326719	69355854	Ropn1
ENSRNOG00000002192	14	45520538	46917835	1.3973	15.8386	11.1495	chr14_46891602	14	45982244	46041866	Rell1
ENSRNOG00000002203	14	10558582	10982849	0.424267	10.6727	5.99085	chr14_10574867	14	10786399	10828106	Lin54
ENSRNOG00000002215	11	68081196	69900082	1.81889	5.9313	5.07084	chr11_69198733	11	69013050	69223158	Mylk
ENSRNOG00000002238	11	67333837	69343844	2.01001	8.80606	5.07264	chr11_67570083	11	68306659	68349238	Sema5b
ENSRNOG00000002241	11	68746629	68942529	0.1959	5.66215	5.21511	chr11_68942529	11	68141342	68197834	Hspbap1
ENSRNOG00000002254	14	42555064	42992903	0.437839	7.62583	5.08424	chr14_42555064	14	42535701	42560174	Tmem33
ENSRNOG00000002352	13	68768418	69956274	1.18786	8.31039	5.00261	chr13_69295056	13	69765091	69781019	Tsen15
ENSRNOG00000002358	10	76361508	77163057	0.801549	24.314	19.3542	chr10_76361508	10	76230373	76263866	Scpep1
ENSRNOG00000002396	13	26932898	28825392	1.89249	9.02478	5.04243	chr13_27899446	13	27889345	27914006	Serpinb8
ENSRNOG00000002443	10	42665646	43226142	0.560496	6.51881	5.53935	chr10_42665646	10	42933077	42945564	Mfap3
ENSRNOG00000002471	11	65958987	67323205	1.36422	7.34401	5.08921	chr11_65965811	11	66585881	66695353	Polq
ENSRNOG00000002480	17	89947860	90843072	0.895212	11.8445	6.87971	chr17_90067658	17	90670872	90746804	Gpr137b
ENSRNOG00000002488	10	42370574	43620241	1.24967	10.2329	5.72906	chr10_43556125	10	43067299	43210427	Galnt10
ENSRNOG00000002516	6	17831677	18602735	0.771058	13.8183	10.1418	chr6_18602735	6	18821815	18839409	Mtm1
ENSRNOG00000002569	13	77542893	78661331	1.11844	6.03944	5.22627	chr13_78114149	13	77940454	77946201	Mrps14
ENSRNOG00000002597	7	2582982	3314897	0.731915	21.1006	17.1444	chr7_2582982	7	2412363	2431197	Hsd17b6
ENSRNOG00000002609	17	89947860	90843072	0.895212	14.0285	9.55502	chr17_90737696	17	90710555	90756048	Ero1b
ENSRNOG00000002636	10	6108681	8153518	2.04484	11.4363	6.45205	chr10_7285819	10	7093405	7200499	Abat
ENSRNOG00000002653	13	106795542	108829243	2.0337	10.1486	5.31296	chr13_108740704	13	107690087	107886476	Kcnk2
ENSRNOG00000002667	13	70474989	71598053	1.12306	8.03542	5.10491	chr13_71149386	13	70566643	70626252	Lamc2
ENSRNOG00000002671	10	81169318	82451648	1.28233	14.9099	10.5925	chr10_81977999	10	81648216	81653717	Nme2
ENSRNOG00000002693	10	81440278	82451648	1.01137	13.6636	9.15911	chr10_81969187	10	81657153	81666523	Nme1
ENSRNOG00000002728	14	17701053	18705302	1.00425	8.82937	5.00263	chr14_18694602	14	18231860	18272484	Btc
ENSRNOG00000002764	10	60875549	62450988	1.57544	6.91707	5.13945	chr10_62450988	10	61626597	61672136	Mettl16
ENSRNOG00000002795	10	101996129	102683429	0.6873	5.90875	5.14683	chr10_102515834	10	102167771	102180569	Cog1
ENSRNOG00000002810	10	34285217	35953168	1.66795	7.38012	5.05368	chr10_34361189	10	35279236	35325508	Gfpt2
ENSRNOG00000002811	13	62529860	64944064	2.4142	6.59999	5.09421	chr13_64072721	13	63526486	63959332	Brinp3
ENSRNOG00000002812	10	71674099	71881448	0.207349	6.65955	5.10918	chr10_71881448	10	71843991	71849293	Lhx1
ENSRNOG00000002823	10	35355674	36366717	1.01104	7.51563	5.03954	chr10_35886267	10	35333859	35374355	Mapk9
ENSRNOG00000002840	7	2382091	3292510	0.910419	6.58087	5.1063	chr7_3050336	7	2504695	2511749	Atp5f1b
ENSRNOG00000002866	14	18781132	19957247	1.17612	6.61861	5.15486	chr14_19145093	14	18983853	19025971	Rassf6
ENSRNOG00000002878	14	18767504	20110202	1.3427	5.98445	5.02245	chr14_18873655	14	19078680	19132208	Afm
ENSRNOG00000002895	10	10046586	11299929	1.25334	9.78774	5.00217	chr10_11238148	10	10573191	10581516	Nagpa
ENSRNOG00000002907	13	49691989	51449015	1.75703	6.14577	5.19176	chr13_50079054	13	50555454	50578720	Plekha6
ENSRNOG00000002914	19	25355877	26104379	0.748502	6.47256	5.36687	chr19_25450122	19	25803262	25813467	Trmt1
ENSRNOG00000002922	10	47643923	49502367	1.85844	11.8361	6.95166	chr10_47734009	10	48569555	48586365	Adora2b
ENSRNOG00000002928	10	44598387	45980137	1.38175	10.4945	5.49522	chr10_45808892	10	45535627	45543897	Guk1
ENSRNOG00000002934	13	82723657	83244772	0.521115	7.0389	5.39419	chr13_83059430	13	82737159	82758004	Atp1b1
ENSRNOG00000002936	13	49691989	50530503	0.838514	37.382	33.162	chr13_50530503	13	50537133	50550015	Golt1a
ENSRNOG00000002947	13	82723657	84011585	1.28793	12.0652	7.45727	chr13_83116258	13	83073544	83102401	Dpt
ENSRNOG00000002970	10	47643923	49454673	1.81075	6.09394	5.07248	chr10_49453684	10	48587119	48599208	Zswim7
ENSRNOG00000002977	10	47643923	49502367	1.85844	9.67303	5.03	chr10_49231494	10	48599321	48627374	Ttc19
ENSRNOG00000002986	X	5749086	6450957	0.701871	10.706	6.62132	chrX_6450957	X	5825711	6026398	Efhc2
ENSRNOG00000002997	10	13104889	14989692	1.8848	14.2414	9.40702	chr10_14094001	10	14003320	14013870	Slc9a3r2
ENSRNOG00000003011	19	25090369	26104379	1.01401	20.0044	15.043	chr19_25619995	19	25946979	25949528	Gadd45gip1
ENSRNOG00000003018	13	88438290	89107426	0.669136	6.16444	5.08269	chr13_88676673	13	88995316	89032487	Olfml2b
ENSRNOG00000003042	13	80231220	80640601	0.409381	13.214	8.95115	chr13_80440044	13	80420025	80441374	Mettl13
ENSRNOG00000003070	10	48079073	49808311	1.72924	10.1874	5.20346	chr10_49381412	10	48773828	48831855	Pigl
ENSRNOG00000003098	14	70961766	72476245	1.51448	10.5794	5.66399	chr14_72373022	14	71533063	71637417	Prom1
ENSRNOG00000003108	10	90959045	91654981	0.695936	8.82962	5.11938	chr10_91098318	10	91187593	91196572	Acbd4
ENSRNOG00000003123	10	61202596	62436578	1.23398	6.77328	5.06519	chr10_61307941	10	62140419	62191512	Rpa1
ENSRNOG00000003147	10	34776587	36030294	1.25371	8.27777	5.00573	chr10_35405706	10	35704730	35716294	Sqstm1
ENSRNOG00000003148	10	107052512	108298789	1.24628	7.72865	5.23894	chr10_108298789	10	107338465	107386072	Timp2
ENSRNOG00000003198	10	2419359	3694784	1.27543	19.0413	14.6457	chr10_2970282	10	3411380	3570688	RGD1305733
ENSRNOG00000003209	13	88546614	89633150	1.08654	18.6111	13.6155	chr13_89622169	13	89542378	89565813	Pcp4l1
ENSRNOG00000003214	10	48079073	49979830	1.90076	7.42803	5.00243	chr10_48649150	10	48987822	48989595	AABR07029742.1
ENSRNOG00000003221	13	80168092	80607835	0.439743	5.8584	5.01229	chr13_80329680	13	80517536	80527928	Myoc
ENSRNOG00000003223	13	99669705	101113812	1.44411	8.52994	5.19521	chr13_100707230	13	100666075	100672731	Degs1
ENSRNOG00000003244	10	34763142	35964206	1.20106	7.28337	5.13309	chr10_35918476	10	35737664	35739625	Ltc4s
ENSRNOG00000003259	10	107052512	107639537	0.587025	15.3929	10.6476	chr10_107052512	10	107455845	107477162	C1qtnf1
ENSRNOG00000003260	13	88622832	90113859	1.49103	9.40742	5.03065	chr13_88924881	13	89586283	89591277	Nr1i3
ENSRNOG00000003261	X	9596808	11419114	1.82231	7.15308	5.74627	chrX_11419114	X	10510033	10630297	Usp9x
ENSRNOG00000003262	10	95009781	96536276	1.52649	9.39268	5.40456	chr10_95796091	10	95951234	96015499	Cacng4
ENSRNOG00000003264	10	103682531	104433643	0.751112	6.65077	5.23396	chr10_103742242	10	103732187	103736973	Nat9
ENSRNOG00000003276	10	67120048	69060820	1.94077	8.49825	5.1188	chr10_67798315	10	67866940	68142864	Myo1d
ENSRNOG00000003289	14	69720074	70202691	0.482617	5.81972	5.06126	chr14_69720074	14	70102814	70121797	Lap3
ENSRNOG00000003291	13	83059430	84936465	1.87704	23.482	19.6301	chr13_84811765	13	83972212	83984675	Creg1
ENSRNOG00000003300	13	49960524	50159711	0.199187	5.60495	5.36164	chr13_50159711	13	50913180	50916982	Btg2
ENSRNOG00000003307	19	25090369	26104379	1.01401	8.66712	5.12359	chr19_25090369	19	26000497	26006970	Gcdh
ENSRNOG00000003367	10	53071698	54089766	1.01807	6.68552	5.27157	chr10_53395997	10	53570989	53579321	Tmem220
ENSRNOG00000003464	10	103307010	104419135	1.11213	8.2288	5.04465	chr10_103496580	10	103899150	103919605	Hid1
ENSRNOG00000003480	13	91749322	92906758	1.15744	6.69159	5.00223	chr13_92074311	13	91954138	91962588	Aim2
ENSRNOG00000003486	13	92039320	92432631	0.393311	11.4518	7.40412	chr13_92334952	13	92073668	92089980	Mnda
ENSRNOG00000003491	10	95593117	97528908	1.93579	7.58311	5.02715	chr10_97528908	10	96191133	96584947	Prkca
ENSRNOG00000003496	19	24160001	24419753	0.259752	5.38643	5.08426	chr19_24160001	19	24329023	24429909	Tbc1d9
ENSRNOG00000003509	13	92061379	92432667	0.371288	6.66481	5.06052	chr13_92094692	13	92146586	92147539	Olr1588
ENSRNOG00000003524	10	81977999	82867796	0.889797	18.257	14.5867	chr10_82451648	10	82352390	82367047	Lrrc59
ENSRNOG00000003536	10	35252544	35964206	0.711662	23.4304	18.4325	chr10_35953168	10	35882805	35927268	Rufy1
ENSRNOG00000003550	13	72573892	74113942	1.54005	6.06937	5.03308	chr13_74113942	13	73196571	73334077	Acbd6
ENSRNOG00000003562	13	100346859	101113812	0.766953	7.91995	5.03444	chr13_100481558	13	101181994	101307908	Susd4
ENSRNOG00000003601	13	99311250	100381800	1.07055	11.1874	6.20949	chr13_99402537	13	99387950	99395842	RGD1564463
ENSRNOG00000003611	X	13919821	15576044	1.65622	12.184	7.79427	chrX_14454391	X	14633342	14642424	Dynlt3
ENSRNOG00000003649	13	72573892	74458136	1.88424	19.225	14.7056	chr13_73755239	13	73423397	73460935	Qsox1
ENSRNOG00000003650	10	103694586	104419135	0.724549	7.14777	5.1146	chr10_103911439	10	104052831	104054805	Nt5c
ENSRNOG00000003683	10	53395997	54731992	1.336	13.2698	8.66616	chr10_54406466	10	54260290	54323439	Glp2r
ENSRNOG00000003713	X	44317119	45778379	1.46126	11.2074	6.60435	chrX_45416225	X	45244038	45259492	Pbsn
ENSRNOG00000003717	13	99267757	100381800	1.11404	6.42366	5.18821	chr13_99356788	13	99473044	99489263	Cnih4
ENSRNOG00000003749	X	14125795	14951469	0.825674	6.20373	5.21983	chrX_14951469	X	14498119	14534473	Xk
ENSRNOG00000003759	6	121862445	122317195	0.45475	9.5755	5.03698	chr6_121980077	6	122178602	122239614	Galc
ENSRNOG00000003769	13	43167438	45310279	2.14284	17.931	13.4857	chr13_45270694	13	44166306	44345735	Tmem163
ENSRNOG00000003782	X	42644532	44438893	1.79436	9.50636	6.11683	chrX_43989438	X	43543070	43592200	Acot9
ENSRNOG00000003800	10	96556907	98213675	1.65677	8.99347	5.04159	chr10_96955011	10	97509971	97582188	Rgs9
ENSRNOG00000003822	10	28052810	29068558	1.01575	6.22995	5.36693	chr10_28807164	10	29029590	29044583	Slu7
ENSRNOG00000003827	10	97247510	98098384	0.850874	8.12337	5.43238	chr10_97304324	10	97859727	97896525	Wipi1
ENSRNOG00000003841	13	110992505	111862491	0.869986	14.6554	10.1715	chr13_111083325	13	110920737	111232269	Kcnh1
ENSRNOG00000003853	19	23826659	25090369	1.26371	11.8295	6.87925	chr19_24641686	19	24584455	24614019	Scoc
ENSRNOG00000003855	10	10184638	11299929	1.11529	7.20018	5.44418	chr10_11299929	10	11060313	11085210	Dnaja3
ENSRNOG00000003858	X	10241556	10365214	0.123658	6.17518	5.40656	chrX_10241556	X	11136939	11164915	Atp6ap2
ENSRNOG00000003861	13	81549310	82005062	0.455752	22.4073	19.0137	chr13_81845638	13	81682018	81698833	Gorab
ENSRNOG00000003872	9	52194345	52932000	0.737655	5.95229	5.09763	chr9_52194345	9	52894365	52912293	Slc40a1
ENSRNOG00000003884	13	43670849	45392609	1.72176	7.26142	5.01406	chr13_45270694	13	44424689	44468734	Acmsd
ENSRNOG00000003905	10	91719811	92372148	0.652337	7.83117	5.02893	chr10_92177394	10	91878633	92008082	Nsf
ENSRNOG00000003931	10	97247510	98079626	0.832116	9.3	5.28094	chr10_97304324	10	97771264	97863311	Arsg
ENSRNOG00000003984	X	133964423	135793536	1.82911	7.47575	5.30112	chrX_135046568	X	134856726	134866210	Apln
ENSRNOG00000003999	6	28626975	28824228	0.197253	5.20313	5.04337	chr6_28824228	6	28571351	28650148	Adcy3
ENSRNOG00000004011	7	33199220	34122928	0.923708	16.9972	12.0024	chr7_33754999	7	33543828	33584564	Nedd1
ENSRNOG00000004032	10	103398831	104953936	1.5551	10.6858	5.68842	chr10_104416084	10	104320743	104343396	Tmem94
ENSRNOG00000004040	10	98302862	98331393	0.028531	40.8316	36.8862	chr10_98331393	10	98237141	98294522	Abca8
ENSRNOG00000004085	8	131077346	132799553	1.72221	14.5696	9.88834	chr8_131872464	8	131845696	131875786	Tcaim
ENSRNOG00000004091	10	85448613	86518520	1.06991	9.94348	6.32905	chr10_86363390	10	85684898	85709568	Cwc25
ENSRNOG00000004139	10	55026913	56270290	1.24338	9.22397	5.43617	chr10_55106434	10	55411901	55444861	Ndel1
ENSRNOG00000004146	10	10951629	11324727	0.373098	21.7125	16.9868	chr10_11051690	10	11090314	11143881	Coro7
ENSRNOG00000004147	10	98147501	98446159	0.298658	17.0234	12.9451	chr10_98413692	10	98319480	98390384	Abca8a
ENSRNOG00000004160	X	28259296	29369046	1.10975	12.3299	7.96685	chrX_28259296	X	28435507	28472880	Prps2
ENSRNOG00000004165	6	71112576	71957794	0.845218	7.48889	5.06997	chr6_71638538	6	71035332	71349249	Prkd1
ENSRNOG00000004180	7	66340903	67075538	0.734635	12.8313	12.358	chr7_66340903	7	66017086	66172360	Fam19a2
ENSRNOG00000004200	7	82671860	84369785	1.69792	10.6241	5.70627	chr7_83581561	7	83600617	83670356	Sybu
ENSRNOG00000004208	6	1604982	1691604	0.086622	5.39238	5.05744	chr6_1604982	6	788548	960703	Crim1
ENSRNOG00000004263	13	109320316	111169283	1.84897	7.28441	5.05546	chr13_110067714	13	110257571	110310413	Ints7
ENSRNOG00000004279	14	64742191	65603593	0.861402	5.32519	5.04731	chr14_64769915	14	64686793	64786497	Adgra3
ENSRNOG00000004280	14	84305610	84343425	0.037815	5.44607	5.39695	chr14_84343425	14	84174138	84189266	Tcn2
ENSRNOG00000004292	6	75290990	76363747	1.07276	9.54788	5.59451	chr6_76044632	6	75540174	75551625	Sptssa
ENSRNOG00000004298	7	77779569	79846107	2.06654	11.7468	6.8594	chr7_78801856	7	78769807	78847974	Dpys
ENSRNOG00000004310	10	103398831	104934420	1.53559	7.67402	5.28873	chr10_104416084	10	104344099	104358253	Caskin2
ENSRNOG00000004314	7	67075538	67295237	0.219699	7.53124	5.42899	chr7_67295237	7	66843865	67116980	Ppm1h
ENSRNOG00000004333	10	12312485	13371903	1.05942	6.63708	5.30512	chr10_13070522	10	13087914	13107771	Flywch1
ENSRNOG00000004337	13	73411047	74692344	1.2813	8.78717	5.49912	chr13_73806128	13	74280173	74331214	Fam20b
ENSRNOG00000004344	8	131712054	132913499	1.20145	16.3345	11.6286	chr8_132209390	8	132160172	132189388	Zdhhc3
ENSRNOG00000004391	7	70414839	71143748	0.728909	8.43119	7.66742	chr7_71143748	7	71124921	71226150	AABR07057436.1
ENSRNOG00000004402	13	109399564	111356183	1.95662	8.14864	5.05549	chr13_110882031	13	110398800	110467834	Lpgat1
ENSRNOG00000004421	7	63348555	64636169	1.28761	15.1771	10.5955	chr7_64192695	7	64326465	64341207	Rxylt1
ENSRNOG00000004424	13	50648082	51995510	1.34743	6.31302	5.19906	chr13_51707954	13	51317460	51331705	Rabif
ENSRNOG00000004438	7	133441101	134300362	0.859261	6.26281	5.00564	chr7_133610645	7	133400485	133586677	Cntn1
ENSRNOG00000004461	10	12233085	14094001	1.86092	8.21337	5.05264	chr10_13399207	10	13112212	13115294	NEWGENE_6497122
ENSRNOG00000004484	7	117601513	119485565	1.88405	7.00731	5.03423	chr7_118458262	7	118502676	118504097	Commd5
ENSRNOG00000004503	6	94824619	95196546	0.371927	5.14999	5.10032	chr6_94824619	6	94824112	94834908	L3hypdh
ENSRNOG00000004532	3	3821980	5084638	1.26266	7.48565	5.52467	chr3_5069176	3	4083864	4092289	Fam69b
ENSRNOG00000004537	13	85874923	86504769	0.629846	10.8587	6.03087	chr13_86021987	13	85818427	85868552	Rxrg
ENSRNOG00000004554	7	38392800	39249312	0.856512	12.3413	7.38268	chr7_38799105	7	38742051	38782323	Dcn
ENSRNOG00000004585	7	47201009	47409874	0.208865	5.04521	5.01877	chr7_47409874	7	47181981	47586137	Tmtc2
ENSRNOG00000004595	7	142137266	142313902	0.176636	10.0032	8.00762	chr7_142137266	7	142204036	142210738	Pou6f1
ENSRNOG00000004610	7	37825355	39050964	1.22561	11.9163	7.41763	chr7_38563776	7	38819771	38826862	Lum
ENSRNOG00000004621	14	113135692	115041664	1.90597	17.0034	12.5203	chr14_113135692	14	114126943	114174458	Rtn4
ENSRNOG00000004660	7	77141845	78887825	1.74598	6.79885	5.07205	chr7_77563325	7	77899322	77931029	Fzd6
ENSRNOG00000004668	10	55079049	56492284	1.41324	6.35386	5.27021	chr10_55573072	10	55555089	55559082	Slc25a35
ENSRNOG00000004670	14	85958259	87309634	1.35137	9.91029	5.38166	chr14_86722033	14	86376808	86387608	Ddx56
ENSRNOG00000004672	14	83691902	84339990	0.648088	5.38291	5.20437	chr14_84218912	14	84335597	84355528	Sec14l2
ENSRNOG00000004710	6	25350867	27026614	1.67575	23.3734	18.6256	chr6_26989075	6	26051396	26128906	Rbks
ENSRNOG00000004725	7	142137266	142313902	0.176636	34.0703	30.6244	chr7_142313902	7	142305338	142318620	Cela1
ENSRNOG00000004736	13	73481897	74622148	1.14025	24.5285	20.8769	chr13_73948878	13	74422944	74564184	Ralgps2
ENSRNOG00000004749	13	109694228	110914212	1.21998	8.01827	5.03003	chr13_110914212	13	110677810	110681683	Slc30a1
ENSRNOG00000004756	13	51314323	52462042	1.14772	13.0102	8.05345	chr13_52329674	13	51534025	51578052	Syt2
ENSRNOG00000004757	8	131817436	132913499	1.09606	5.63636	5.00736	chr8_132192530	8	132344710	132345708	Tmem158
ENSRNOG00000004766	10	10184882	11324727	1.13984	6.76976	5.04893	chr10_11318014	10	11154658	11174861	Glis2
ENSRNOG00000004812	3	116163213	117149497	0.986284	12.4526	7.47857	chr3_116978665	3	116899878	116958050	Sema6d
ENSRNOG00000004834	10	103405237	104419135	1.0139	17.8405	13.0996	chr10_104377502	10	104368247	104403724	Llgl2
ENSRNOG00000004844	7	91387550	93197543	1.80999	12.7926	8.48893	chr7_91968156	7	92234597	92256100	Med30
ENSRNOG00000004926	3	99981509	100837657	0.856148	12.5038	7.64765	chr3_100376354	3	100183405	100364400	Mettl15
ENSRNOG00000004932	14	59147218	60272491	1.12527	11.3038	6.41999	chr14_60187772	14	60123169	60229734	Sel1l3
ENSRNOG00000004941	6	25350867	27026614	1.67575	19.4881	14.6028	chr6_25571702	6	26242925	26272808	Gpn1
ENSRNOG00000004951	3	135699307	137835824	2.13652	10.7366	5.77073	chr3_137459932	3	136657480	136936674	Kif16b
ENSRNOG00000004998	14	78150301	78938281	0.78798	8.1274	5.37811	chr14_78938281	14	78424960	78469480	Jakmip1
ENSRNOG00000005003	6	143718890	144708022	0.989132	17.4053	14.0441	chr6_143922303	6	144384773	145133042	Ptprn2
ENSRNOG00000005015	10	56802932	58538223	1.73529	12.5123	7.60425	chr10_57153648	10	57462447	57579898	Rabep1
ENSRNOG00000005016	14	85394811	87329800	1.93499	13.461	8.7677	chr14_85948687	14	86390338	86395135	Tmed4
ENSRNOG00000005031	3	5050223	5689465	0.639242	5.28233	5.00281	chr3_5071019	3	5441409	5452156	Surf6
ENSRNOG00000005042	10	17735152	18949200	1.21405	16.1885	12.0496	chr10_18821263	10	18139766	18443964	Ranbp17
ENSRNOG00000005061	6	108514967	109484680	0.969713	16.9369	12.0873	chr6_108514967	6	108936664	108959803	Dlst
ENSRNOG00000005076	X	134685891	136091089	1.4052	12.3751	7.7041	chrX_136091089	X	135187468	135233839	Bcorl1
ENSRNOG00000005094	14	71381290	71535780	0.15449	5.86759	5.43497	chr14_71381290	14	72011461	72122158	C1qtnf7
ENSRNOG00000005096	6	55567001	56644682	1.07768	5.96534	5.27972	chr6_56644682	6	55586346	55647665	Bzw2
ENSRNOG00000005108	14	78660182	78938281	0.278099	15.2396	14.1941	chr14_78938281	14	78640620	78665966	Wfs1
ENSRNOG00000005122	14	82720579	82826714	0.106135	5.2593	5.13763	chr14_82720579	14	82623050	82658891	Uvssa
ENSRNOG00000005123	7	81413955	83360695	1.94674	11.6025	6.61162	chr7_82218421	7	82338663	82377109	Emc2
ENSRNOG00000005141	14	89048139	89838493	0.790354	8.57495	5.06632	chr14_89221686	14	89194092	89208825	Hus1
ENSRNOG00000005176	X	37695747	39120355	1.42461	9.41086	5.19394	chrX_38657776	X	38397261	38468360	Map7d2
ENSRNOG00000005177	13	74735828	75997979	1.26215	13.7694	9.57761	chr13_74803234	13	75105615	75143441	Tp53i3
ENSRNOG00000005193	10	55106434	56492284	1.38585	18.1916	13.4392	chr10_55573072	10	55571118	55589978	Pfas
ENSRNOG00000005195	3	142509423	144181853	1.67243	6.88105	5.01886	chr3_143623997	3	143219686	143223615	Cst3
ENSRNOG00000005228	7	29008480	29860151	0.851671	12.7523	7.76431	chr7_29050230	7	28956512	29022868	Gnptab
ENSRNOG00000005229	13	75183036	75608262	0.425226	5.33321	5.12189	chr13_75183036	13	75175254	75216941	Sec16b
ENSRNOG00000005266	7	34225782	35094300	0.868518	27.3125	23.1588	chr7_34247627	7	34361633	34406318	Amdhd1
ENSRNOG00000005271	6	145402620	145790369	0.387749	5.87285	5.17765	chr6_145790369	6	145546595	145625236	Rapgef5
ENSRNOG00000005279	6	1063340	1808786	0.745446	6.5701	5.01166	chr6_1152042	6	1534594	1545828	Ndufaf7
ENSRNOG00000005286	6	72210346	73297748	1.0874	21.0735	17.9663	chr6_73297748	6	72359791	72373695	Coch
ENSRNOG00000005302	14	76939576	77147229	0.207653	24.9128	20.0242	chr14_77130491	14	77067503	77192702	Slc2a9
ENSRNOG00000005342	13	47209774	48412378	1.2026	5.86485	5.0714	chr13_48412378	13	47956790	48022333	Rassf5
ENSRNOG00000005348	3	92304930	92386925	0.081995	5.66329	5.62166	chr3_92304930	3	92403582	92502089	Pamr1
ENSRNOG00000005357	10	55106434	56492284	1.38585	21.0774	16.6272	chr10_55573072	10	55596148	55616889	Ctc1
ENSRNOG00000005367	3	117175406	117603374	0.427968	14.4267	11.4137	chr3_117359254	3	117421604	117498367	Slc12a1
ENSRNOG00000005392	10	83014762	83439196	0.424434	13.6973	9.97617	chr10_83268887	10	83389847	83408061	Ngfr
ENSRNOG00000005428	14	81852627	83744806	1.89218	8.10792	5.36744	chr14_82914465	14	82762190	82789319	Ctbp1
ENSRNOG00000005464	14	105979123	106034076	0.054953	5.66862	5.08993	chr14_106034076	14	105047919	105055421	Lgalsl
ENSRNOG00000005478	4	87020762	88197107	1.17634	6.63346	5.08884	chr4_88178891	4	87167514	87234197	Fkbp9
ENSRNOG00000005483	3	110717695	112046884	1.32919	6.90644	5.21809	chr3_111321398	3	111565650	111587151	Rpap1
ENSRNOG00000005492	6	42259189	43697424	1.43823	6.54118	5.0092	chr6_43187265	6	43001948	43109071	Hpcal1
ENSRNOG00000005522	6	49793827	49898551	0.104724	20.7325	16.7579	chr6_49813618	6	49852130	49895510	Sh3yl1
ENSRNOG00000005569	10	83740049	84562159	0.82211	33.7497	29.1131	chr10_83783826	10	83636518	83643859	Phospho1
ENSRNOG00000005589	6	94535633	96432291	1.89666	11.1944	6.32074	chr6_96055439	6	95522577	95541393	Dhrs7
ENSRNOG00000005610	6	21599285	22564028	0.964743	11.6006	6.60113	chr6_22148570	6	22126870	22138286	Yipf4
ENSRNOG00000005614	7	118458262	120126008	1.66775	7.0302	5.07601	chr7_119485565	7	119144351	119158201	Txn2
ENSRNOG00000005660	6	50455485	50734013	0.278528	5.27104	5.23773	chr6_50455485	6	49968473	49974728	Fam110c
ENSRNOG00000005668	3	14384398	16313120	1.92872	9.92572	5.03286	chr3_15488541	3	15362824	15379381	Ndufa8
ENSRNOG00000005724	5	47114044	47170366	0.056322	12.1115	9.17689	chr5_47170366	5	47186558	47244416	LOC100910771
ENSRNOG00000005731	8	6071615	6779308	0.707693	5.9023	5.05478	chr8_6071615	8	6048969	6076598	Birc3
ENSRNOG00000005762	3	171541530	171643365	0.101835	5.35718	5.12347	chr3_171643365	3	171743929	171790558	Rab22a
ENSRNOG00000005840	3	4990909	5751749	0.76084	5.2783	5.06193	chr3_5751749	3	5555807	5572064	Cacfd1
ENSRNOG00000005861	13	110931768	112591908	1.66014	18.6509	14.1431	chr13_112257042	13	111926442	111972603	Hsd11b1
ENSRNOG00000005868	3	51969382	53318124	1.34874	16.5453	13.1133	chr3_52627767	3	52286794	52361060	Ttc21b
ENSRNOG00000005877	6	7167575	8151615	0.98404	7.76366	5.25809	chr6_7820321	6	7984019	8066868	Lrpprc
ENSRNOG00000005888	3	109597462	111013696	1.41623	8.23576	5.19905	chr3_109597462	3	109969152	110021149	Fsip1
ENSRNOG00000005924	3	138101300	138585151	0.483851	48.6338	44.013	chr3_138585151	3	138024508	138051298	Dstn
ENSRNOG00000005930	8	52889405	53187898	0.298493	5.90399	5.07597	chr8_52933835	8	52925175	52937972	Nnmt
ENSRNOG00000005965	7	135441327	136495675	1.05435	17.9667	13.4208	chr7_135583573	7	135803698	135832652	Irak4
ENSRNOG00000005975	7	73155248	73910122	0.754874	35.2728	30.3917	chr7_73155248	7	73213581	73216251	LOC100362027
ENSRNOG00000005998	6	103823886	105813160	1.98927	9.3624	5.10266	chr6_104842746	6	104718512	104877980	Smoc1
ENSRNOG00000006027	3	109202925	111174664	1.97174	6.52025	5.11209	chr3_111022814	3	110159708	110249217	Eif2ak4
ENSRNOG00000006050	3	72150109	72527110	0.377001	5.1128	5.10589	chr3_72150109	3	72080630	72091150	Med19
ENSRNOG00000006076	4	25406914	25915483	0.508569	15.5244	12.2836	chr4_25836765	4	25507463	25527087	Steap2
ENSRNOG00000006104	7	107640470	108646097	1.00563	9.71012	5.4894	chr7_107776285	7	107467260	107652899	Tg
ENSRNOG00000006114	4	25293430	26520131	1.2267	6.06926	5.14088	chr4_25293430	4	25538497	25609652	Cfap69
ENSRNOG00000006119	6	33146112	33312515	0.166403	16.719	14.2426	chr6_33256885	6	33728107	33738825	Slc7a15
ENSRNOG00000006131	10	92362367	94185503	1.82314	22.3153	19.0733	chr10_93181855	10	93354003	93379470	Mettl2b
ENSRNOG00000006148	10	36785702	37235142	0.44944	6.12684	5.36394	chr10_37235142	10	37757146	37769776	RGD1310352
ENSRNOG00000006197	4	56425722	57169619	0.743897	5.37693	5.04354	chr4_57169619	4	56625561	56653111	Calu
ENSRNOG00000006199	6	55692209	57142199	1.44999	9.73515	5.56812	chr6_56201624	6	55881387	56159464	Ispd
ENSRNOG00000006204	6	25699066	27568916	1.86985	12.0181	7.54578	chr6_26989075	6	26642783	26650105	Slc30a3
ENSRNOG00000006227	3	48038956	49595346	1.55639	8.66158	5.12517	chr3_48964770	3	48557696	48604097	Ifih1
ENSRNOG00000006326	6	25699066	27568916	1.86985	9.10705	5.40075	chr6_27564866	6	26680598	26685235	Atraid
ENSRNOG00000006329	14	105032819	106281116	1.2483	6.06671	5.00738	chr14_106084653	14	106008086	106061641	Peli1
ENSRNOG00000006341	15	4520318	4887149	0.366831	12.215	11.2436	chr15_4887149	15	4658246	4663694	Saysd1
ENSRNOG00000006375	10	36794893	38395543	1.60065	9.49438	5.19903	chr10_37917531	10	37724915	37752826	Vdac1
ENSRNOG00000006403	8	47117876	49047823	1.92995	12.0263	8.91202	chr8_48136969	8	48094673	48157305	Nectin1
ENSRNOG00000006426	7	50325926	51244250	0.918324	6.80932	5.18626	chr7_50513075	7	50084060	50638798	Syt1
ENSRNOG00000006467	6	108514967	109462322	0.947355	27.634	23.5906	chr6_108942905	6	109043880	109051253	Eif2b2
ENSRNOG00000006498	5	28176487	28847071	0.670584	7.28423	5.11799	chr5_28383447	5	28133068	28317943	Lrrc69
ENSRNOG00000006508	4	99007482	99899700	0.892218	7.86096	5.45853	chr4_99580090	4	98976550	98995590	Thnsl2
ENSRNOG00000006514	7	34247627	35827860	1.58023	8.46805	5.17182	chr7_34893087	7	34888491	34951644	Vezt
ENSRNOG00000006526	4	14671735	15385580	0.713845	9.4868	5.01902	chr4_14973223	4	14318274	14490446	Sema3c
ENSRNOG00000006557	10	30644013	32403429	1.75942	10.7615	6.58293	chr10_31085734	10	31278746	31419235	Cyfip2
ENSRNOG00000006593	14	78939701	79581600	0.641899	17.1671	14.0435	chr14_79017515	14	79458963	79464770	Grpel1
ENSRNOG00000006611	3	54442640	55523790	1.08115	11.409	6.54596	chr3_55366690	3	55369214	55433843	Nostrin
ENSRNOG00000006697	5	27966667	28852277	0.88561	6.098	5.10485	chr5_28801465	5	28395296	28442924	Pip4p2
ENSRNOG00000006717	4	150108071	150822913	0.714842	6.66871	5.12926	chr4_150108071	4	150547467	150616895	Ankrd26
ENSRNOG00000006726	4	150108071	150833054	0.724983	7.62626	5.05681	chr4_150587201	4	150517027	150522351	Zfp9
ENSRNOG00000006749	7	40053680	40409541	0.355861	5.44563	5.18876	chr7_40053680	7	40171963	40217056	Tmtc3
ENSRNOG00000006779	4	21795563	23106249	1.31069	9.00375	5.06654	chr4_21966040	4	22081604	22116265	Crot
ENSRNOG00000006797	X	134568205	135872329	1.30412	6.36146	5.17991	chrX_135495221	X	135370822	135419704	Zfp280c
ENSRNOG00000006804	5	8812900	8928372	0.115472	5.22652	5.05656	chr5_8928372	5	8916633	8956119	Ppp1r42
ENSRNOG00000006818	4	128895171	129649803	0.754632	7.47541	5.07469	chr4_129575607	4	129574264	129598915	Arl6ip5
ENSRNOG00000006844	7	2582982	3314897	0.731915	22.8378	20.0191	chr7_3014786	7	3230320	3242265	Dnajc14
ENSRNOG00000006853	5	108696416	110621314	1.9249	20.5587	15.5764	chr5_110163900	5	109499408	109651730	Elavl2
ENSRNOG00000006855	5	159411834	159451207	0.039373	5.98658	5.26847	chr5_159411834	5	159260675	159293673	Padi4
ENSRNOG00000006858	4	87876555	89388571	1.51202	6.31497	5.03752	chr4_88342632	4	88584242	88587877	Pyurf
ENSRNOG00000006871	X	135484904	136091089	0.606185	6.59152	5.19423	chrX_135861275	X	135470915	135509221	Slc25a14
ENSRNOG00000006876	14	77969942	78093626	0.123684	5.47834	5.30175	chr14_77969942	14	77712240	77716059	Msx1
ENSRNOG00000006894	3	9744381	10743487	0.999106	7.48744	5.30067	chr3_10739426	3	9800322	9807328	Tor1a
ENSRNOG00000006895	10	63294229	65232401	1.93817	9.31296	5.5112	chr10_63353670	10	64222276	64341109	Vps53
ENSRNOG00000006898	15	4298851	4508284	0.209433	6.46827	5.39725	chr15_4298851	15	4351292	4353694	Mrps16
ENSRNOG00000006924	5	137285723	138213848	0.928125	19.1212	14.3676	chr5_137388037	5	137370577	137372993	Tmem125
ENSRNOG00000006926	5	32964569	34413575	1.44901	23.1154	18.4782	chr5_33380977	5	33843519	33892462	Atp6v0d2
ENSRNOG00000006930	13	89835170	90751063	0.915893	8.35978	5.95816	chr13_89932133	13	90592681	90602365	Casq1
ENSRNOG00000006986	6	75620062	76473437	0.853375	7.33887	5.54273	chr6_76124978	6	75945889	75996216	RGD1304624
ENSRNOG00000007000	7	75358352	76526784	1.16843	9.28094	5.00152	chr7_76111049	7	76059386	76197856	Grhl2
ENSRNOG00000007023	6	2527714	3666153	1.13844	9.43345	5.09802	chr6_3006367	6	2808841	2860744	Galm
ENSRNOG00000007030	5	43509908	43662053	0.152145	7.44798	5.00575	chr5_43529697	5	43603043	43757549	Epha7
ENSRNOG00000007032	7	137971690	139426628	1.45494	10.5787	5.69423	chr7_138728823	7	138704126	138707221	Amigo2
ENSRNOG00000007033	14	78939701	80812862	1.87316	9.3954	5.05279	chr14_79672571	14	79538911	79912333	Sorcs2
ENSRNOG00000007041	4	88546542	89827836	1.28129	32.46	28.3712	chr4_89264163	4	88832178	88890621	Abcg2
ENSRNOG00000007047	4	171473273	171802228	0.328955	9.18619	6.89364	chr4_171620685	4	171475567	171591882	Eps8
ENSRNOG00000007054	10	57314039	57659090	0.345051	6.29103	5.19421	chr10_57314039	10	57622022	57638485	Dhx33
ENSRNOG00000007057	5	146014435	146665072	0.650637	5.84854	5.46969	chr5_146665072	5	146383942	146739418	Csmd2
ENSRNOG00000007069	5	8578650	10382263	1.80361	8.05259	5.10815	chr5_9094392	5	9403196	9429859	Adhfe1
ENSRNOG00000007081	6	25123666	25259406	0.13574	21.2582	17.8433	chr6_25141164	6	25149235	25211494	Xdh
ENSRNOG00000007118	4	112759126	113736957	0.977831	33.4187	29.5433	chr4_112949083	4	112773938	112823659	Eva1a
ENSRNOG00000007127	3	54891317	55820019	0.928702	11.1816	6.58096	chr3_55767343	3	55886695	55907716	Bbs5
ENSRNOG00000007139	5	33773947	35027740	1.25379	6.62493	5.02895	chr5_34739847	5	34007920	34028452	Ttpa
ENSRNOG00000007178	4	99007482	99580090	0.572608	24.8816	21.1199	chr4_99298945	4	99239115	99243351	Cd8a
ENSRNOG00000007221	3	117208681	118414846	1.20616	8.10262	5.39994	chr3_117241742	3	117514444	117525446	Dut
ENSRNOG00000007235	10	83904890	83961442	0.056552	17.2633	14.8245	chr10_83904890	10	83895947	83898527	Atp5mc1
ENSRNOG00000007247	4	161943665	162801790	0.858125	7.54413	5.61653	chr4_161978545	4	161866078	161907767	A2ml1
ENSRNOG00000007262	7	122765025	123738551	0.973526	9.13719	5.53738	chr7_123548767	7	123364312	123376221	Ccdc134
ENSRNOG00000007272	4	98496232	100352521	1.85629	11.6881	7.08064	chr4_98975830	4	99398494	99421164	Rnf103
ENSRNOG00000007285	3	163203717	163518327	0.31461	22.1534	17.5342	chr3_163427889	3	163552166	163555596	Tp53rk
ENSRNOG00000007304	4	88653386	90068496	1.41511	7.90875	5.46988	chr4_89215539	4	89078711	89169146	Herc3
ENSRNOG00000007331	5	47560550	48244327	0.683777	8.0877	5.45352	chr5_48244327	5	48224994	48260685	Rragd
ENSRNOG00000007332	7	118855234	119988364	1.13313	20.3419	16.0288	chr7_119875792	7	119760888	119768082	Sstr3
ENSRNOG00000007333	6	134792986	136141209	1.34822	6.64288	5.21298	chr6_134792986	6	135156984	135226425	Wdr20
ENSRNOG00000007351	5	33098086	34487803	1.38972	22.271	17.3924	chr5_34288072	5	34040258	34063361	Ggh
ENSRNOG00000007359	3	48703752	48964833	0.261081	6.4451	5.77141	chr3_48703752	3	48626038	48661317	Gca
ENSRNOG00000007371	X	135398378	135525665	0.127287	5.33923	5.16262	chrX_135525665	X	135550834	135558440	Rbmx2
ENSRNOG00000007398	5	138160912	138240259	0.079347	5.39773	5.24563	chr5_138240259	5	138217845	138222534	Zfp691
ENSRNOG00000007407	7	34225782	36156599	1.93082	9.11276	5.00213	chr7_35412297	7	35125424	35167406	Ndufa12
ENSRNOG00000007408	3	122126806	123116260	0.989454	35.2578	31.1803	chr3_122391218	3	122836446	122890663	Ebf4
ENSRNOG00000007445	5	22224310	22793881	0.569571	6.71422	5.1794	chr5_22306061	5	22577675	22799349	Asph
ENSRNOG00000007456	5	28827121	30464020	1.6369	7.7997	5.32145	chr5_29636206	5	29538380	29562773	Calb1
ENSRNOG00000007457	3	71204451	73088596	1.88414	7.83032	5.19298	chr3_72150109	3	72161189	72171078	Serping1
ENSRNOG00000007483	10	13544128	13613030	0.068902	5.34258	5.34258	chr10_13544128	10	13594687	13619935	Ccnf
ENSRNOG00000007509	7	14030837	14530342	0.499505	17.6396	12.9281	chr7_14323483	7	13730253	13751271	Slc1a6
ENSRNOG00000007510	2	123066514	124419927	1.35341	12.9075	8.29976	chr2_123771456	2	124054282	124056795	Bbs12
ENSRNOG00000007548	3	137712792	139286820	1.57403	6.80007	5.00249	chr3_138607416	3	138684685	138701055	Polr3f
ENSRNOG00000007558	3	148085891	148807877	0.721986	5.90245	5.00511	chr3_148548022	3	148082790	148091619	Defb36
ENSRNOG00000007561	8	27176010	28423734	1.24772	17.7906	12.8176	chr8_27719397	8	27807301	27852996	Glb1l2
ENSRNOG00000007564	14	77969942	78938281	0.968339	8.75145	5.36362	chr14_78164715	14	78213635	78253266	Evc
ENSRNOG00000007574	5	159468953	160458810	0.989857	26.3211	22.2968	chr5_160458810	5	159428515	159471144	Padi2
ENSRNOG00000007575	5	67911381	68561236	0.649855	10.103	5.5931	chr5_67911381	5	67852180	68139199	Plppr1
ENSRNOG00000007584	3	110910673	111936227	1.02555	11.8995	7.83003	chr3_110961457	3	111877853	111941841	Ehd4
ENSRNOG00000007596	10	70072706	70439212	0.366506	5.8997	5.43063	chr10_70439212	10	70157621	70220582	Rffl
ENSRNOG00000007639	5	123918079	125196826	1.27875	6.61523	5.02964	chr5_124834853	5	124300477	124338053	C8b
ENSRNOG00000007650	7	2512082	4132891	1.62081	8.64835	5.15528	chr7_3191049	7	3320103	3335582	Cd63
ENSRNOG00000007660	6	99169545	99995408	0.825863	31.1697	26.2596	chr6_99995408	6	99883959	99966988	Fntb
ENSRNOG00000007675	5	38358283	40346395	1.98811	13.1095	8.21624	chr5_39690129	5	39329423	39370900	Gpr63
ENSRNOG00000007679	7	120102226	120634534	0.532308	13.7796	9.40308	chr7_120177179	7	119820537	119845003	Cyth4
ENSRNOG00000007688	X	40072796	41399353	1.32656	16.8967	12.6836	chrX_41119659	X	40363646	40415109	Sms
ENSRNOG00000007710	3	9743481	10739426	0.995945	7.27521	5.03128	chr3_10644295	3	9822580	9856057	Usp20
ENSRNOG00000007726	8	48337941	48788407	0.450466	8.43956	7.11865	chr8_48625997	8	48472824	48481001	Mcam
ENSRNOG00000007733	X	64234291	64348509	0.114218	6.95966	5.62481	chrX_64234291	X	64248278	64428592	Arhgef9
ENSRNOG00000007763	5	163921369	165141148	1.21978	7.41563	5.13261	chr5_163921369	5	164720587	164747083	Plod1
ENSRNOG00000007806	4	54941483	55662770	0.721287	6.05745	5.00968	chr4_55656203	4	55715744	55718670	Arf5
ENSRNOG00000007829	5	4537461	5925038	1.38758	13.4449	10.0449	chr5_5925038	5	4982348	5005109	Lactb2
ENSRNOG00000007850	6	134792986	136135046	1.34206	17.638	13.4618	chr6_135187419	6	135228803	135259603	Mok
ENSRNOG00000007862	8	57213967	58918968	1.705	14.8993	9.98817	chr8_57681237	8	58166990	58195884	Acat1
ENSRNOG00000007865	8	109993521	110559346	0.565825	5.47974	5.28767	chr8_109993521	8	110376954	110813000	Ephb1
ENSRNOG00000007866	4	161569943	163349365	1.77942	11.1658	6.22501	chr4_163312752	4	162281574	162402635	Clec2dl1
ENSRNOG00000007869	10	58505615	59128390	0.622775	5.53373	5.05408	chr10_59128390	10	58332588	58371196	Wscd1
ENSRNOG00000007874	4	145984273	147260411	1.27614	9.87914	5.46825	chr4_146573250	4	146922085	146954159	Tamm41
ENSRNOG00000007886	5	78421594	79815908	1.39431	23.155	18.842	chr5_78974166	5	79179417	79182820	Orm1
ENSRNOG00000007894	5	98422910	100128979	1.70607	6.66051	5.29063	chr5_99401402	5	99413187	99566318	Mpdz
ENSRNOG00000007900	4	56296154	57867624	1.57147	11.0214	6.78168	chr4_56954704	4	56981283	57004792	Tspan33
ENSRNOG00000007918	4	66720693	67794155	1.07346	6.59012	5.05216	chr4_67355587	4	66670618	66846805	Tbxas1
ENSRNOG00000007942	4	55029171	56258196	1.22903	6.84544	5.02781	chr4_55056758	4	55720010	55729457	Fscn3
ENSRNOG00000007949	X	917818	2501704	1.58389	6.85063	6.5598	chrX_2501704	X	1833492	1848904	Rgn
ENSRNOG00000007951	6	24240015	24996947	0.756932	5.22234	5.03121	chr6_24240015	6	24770317	24985716	Galnt14
ENSRNOG00000007979	3	55820019	56539292	0.719273	6.06676	5.12998	chr3_55820019	3	56030915	56038075	Phospho2
ENSRNOG00000008012	4	22118483	23234940	1.11646	6.8646	5.51757	chr4_22439916	4	22133521	22425515	Abcb1b
ENSRNOG00000008016	7	24390659	25054824	0.664165	16.203	11.3205	chr7_24997332	7	24939498	24947595	Ckap4
ENSRNOG00000008026	7	13121289	13619609	0.49832	5.73607	5.64247	chr7_13619609	7	12974169	12976330	C2cd4c
ENSRNOG00000008038	7	123128617	123852970	0.724353	6.28366	5.04177	chr7_123436706	7	123531682	123548081	Wbp2nl
ENSRNOG00000008046	6	96225297	96384060	0.158763	5.69817	5.13403	chr6_96384060	6	96439607	96442682	Tmem30b
ENSRNOG00000008064	7	123563330	123617335	0.054005	5.67729	5.05445	chr7_123599390	7	123563059	123572082	Naga
ENSRNOG00000008079	14	106084653	107197986	1.11333	7.25116	5.02369	chr14_107113560	14	106208176	106248539	Ugp2
ENSRNOG00000008090	5	127488883	129454984	1.9661	9.38441	5.023	chr5_127488883	5	128450680	128475864	Txndc12
ENSRNOG00000008099	5	61851163	62831707	0.980544	19.0913	14.145	chr5_62301959	5	62718787	62750145	Galnt12
ENSRNOG00000008102	3	1371813	2243045	0.871232	6.22161	5.07251	chr3_1982450	3	2170533	2179010	Dph7
ENSRNOG00000008116	5	124701906	125196826	0.49492	38.8933	35.0068	chr5_124834853	5	124690214	124765498	Plpp3
ENSRNOG00000008167	15	18491551	18721203	0.229652	6.55978	5.13932	chr15_18635244	15	18647844	18695133	Abhd6
ENSRNOG00000008214	8	84738310	85390143	0.651833	13.6755	9.235	chr8_85066178	8	85388333	85413484	Fbxo9
ENSRNOG00000008232	5	49638705	50208589	0.569884	23.7407	19.8717	chr5_50051872	5	49424061	49439358	Spaca1
ENSRNOG00000008236	5	28622006	30580636	1.95863	12.457	7.46728	chr5_29306040	5	29573898	29601748	Decr1
ENSRNOG00000008245	3	162981113	164403097	1.42198	13.9245	9.16599	chr3_163994845	3	163950777	163986059	AABR07054614.1
ENSRNOG00000008256	10	103688556	105643908	1.95535	7.67008	5.62486	chr10_104721301	10	104682374	104689178	Mrpl38
ENSRNOG00000008274	4	123871862	123912731	0.040869	6.49738	5.11183	chr4_123912731	4	123134457	123161985	Xpc
ENSRNOG00000008283	3	163089477	164403097	1.31362	7.29864	5.35954	chr3_164311757	3	164039731	164095878	B4galt5
ENSRNOG00000008292	6	96334645	96903216	0.568571	6.28288	5.49797	chr6_96903216	6	96810907	96856052	Hif1a
ENSRNOG00000008300	5	147362125	148049877	0.687752	10.387	5.80338	chr5_147750024	5	147554918	147584038	Zbtb8a
ENSRNOG00000008305	8	46691682	47047645	0.355963	6.49721	5.14304	chr8_46888633	8	46525400	46537050	Sc5d
ENSRNOG00000008400	8	62458005	63618780	1.16077	14.8394	9.96888	chr8_63170370	8	63004870	63034226	Pml
ENSRNOG00000008405	10	94186490	94225430	0.03894	5.03323	5.0064	chr10_94186490	10	94260197	94268222	Taco1
ENSRNOG00000008414	7	12698796	13270323	0.571527	5.63557	5.22294	chr7_13270323	7	12875537	12882753	Bsg
ENSRNOG00000008421	14	44622733	44793598	0.170865	5.10512	5.07009	chr14_44622733	14	44805200	44845218	Klhl5
ENSRNOG00000008427	5	159412808	160592320	1.17951	18.6432	14.0931	chr5_159547198	5	159589881	159602251	Necap2
ENSRNOG00000008443	4	168142187	169744539	1.60235	9.24797	5.00782	chr4_168914326	4	168976859	169019561	Fam234b
ENSRNOG00000008482	3	45827527	47317748	1.49022	5.65238	5.15293	chr3_47317748	3	46803355	47025128	Rbms1
ENSRNOG00000008519	8	102136465	102790561	0.654096	5.86832	5.08883	chr8_102197783	8	102088505	102159828	RGD1309079
ENSRNOG00000008526	8	48584778	49566668	0.98189	5.85107	5.08191	chr8_49166937	8	48577952	48582353	Pdzd3
ENSRNOG00000008560	5	138280246	138283464	0.003218	5.98295	5.28394	chr5_138283464	5	138364167	138462864	AABR07049790.1
ENSRNOG00000008566	5	13799246	14867476	1.06823	7.37953	5.05836	chr5_14348076	5	14609674	14620965	Mrpl15
ENSRNOG00000008586	7	25495122	26780253	1.28513	7.13801	5.1108	chr7_26192970	7	26375866	26425108	Aldh1l2
ENSRNOG00000008596	3	148474524	148497326	0.022802	48.2049	44.4418	chr3_148474524	3	148438939	148485360	Ttll9
ENSRNOG00000008680	8	62347595	63618780	1.27119	9.3729	5.1349	chr8_63308616	8	63067300	63092009	Loxl1
ENSRNOG00000008689	10	84562159	84873408	0.311249	7.69078	5.29796	chr10_84873408	10	84669914	84675741	Cbx1
ENSRNOG00000008693	5	147362125	148052425	0.6903	9.43239	5.92309	chr5_147750024	5	147690239	147691997	Tssk3
ENSRNOG00000008694	7	130315089	130466840	0.151751	51.0784	46.6946	chr7_130443383	7	130308532	130313727	Miox
ENSRNOG00000008716	14	85196317	85403300	0.206983	29.9871	29.3465	chr14_85228837	14	85181572	85191557	Nefh
ENSRNOG00000008746	3	138046821	139057477	1.01066	6.75477	5.0438	chr3_138317174	3	138770574	138931549	Dtd1
ENSRNOG00000008758	3	82132281	82393631	0.26135	44.7932	43.1235	chr3_82132281	3	82097068	82236664	Tspan18
ENSRNOG00000008797	7	31446289	31998541	0.552252	20.3585	16.06	chr7_31623187	7	31847410	31872423	Tmpo
ENSRNOG00000008798	10	64944974	65865043	0.920069	7.82513	5.01769	chr10_64984312	10	64952119	64964862	Pipox
ENSRNOG00000008839	4	146357622	147774988	1.41737	12.1461	7.51166	chr4_147200069	4	147274107	147399380	Pparg
ENSRNOG00000008842	5	133142337	134070712	0.928375	7.39169	5.14784	chr5_133622763	5	133978954	134008255	Cyp4a8
ENSRNOG00000008859	3	47460189	48503654	1.04347	6.42079	5.26167	chr3_47502972	3	47439076	47515700	Tank
ENSRNOG00000008868	3	67912295	68768477	0.856182	7.01643	5.0564	chr3_68768477	3	67849966	67862475	Dusp19
ENSRNOG00000008901	5	61230216	62781250	1.55103	7.62965	5.1217	chr5_62178616	5	62156839	62187930	Coro2a
ENSRNOG00000008922	5	61662210	61807870	0.14566	6.29535	5.13064	chr5_61707423	5	62128941	62153786	Trim14
ENSRNOG00000008937	13	52489086	52797735	0.308649	7.51436	5.45515	chr13_52538252	13	52553775	52575051	Csrp1
ENSRNOG00000008944	3	82444575	82901516	0.456941	15.87	10.9216	chr3_82444575	3	82602785	82734533	Ext2
ENSRNOG00000008945	5	61278132	62436770	1.15864	14.4379	9.48554	chr5_61938125	5	62109328	62126494	Nans
ENSRNOG00000008966	5	4867242	6840398	1.97316	11.8624	6.94125	chr5_5925038	5	5866897	5989667	Slco5a1
ENSRNOG00000008970	15	66634123	68638568	2.00445	7.50526	5.01328	chr15_68544632	15	67555835	67645088	Pcdh17
ENSRNOG00000008984	8	90009675	90655025	0.64535	11.2743	7.29715	chr8_90597576	8	90343154	90360086	Irak1bp1
ENSRNOG00000008988	7	123128617	123738551	0.609934	5.86525	5.21181	chr7_123548767	7	123651827	123655896	Cyp2d2
ENSRNOG00000008996	6	25999105	28018520	2.01941	10.2113	5.43714	chr6_27026614	6	26939697	27024129	Dpysl5
ENSRNOG00000009014	8	57454142	58347742	0.8936	26.3937	22.1566	chr8_58105520	8	58347736	58391599	Slc35f2
ENSRNOG00000009019	4	122656970	123262143	0.605173	5.56235	5.04857	chr4_122656970	4	123642210	123713464	Slc6a6
ENSRNOG00000009035	4	78449512	79709471	1.25996	8.56946	5.02593	chr4_79340752	4	78735279	78744102	Malsu1
ENSRNOG00000009039	6	46986207	48897926	1.91172	11.097	6.21849	chr6_47998857	6	47955310	48020271	Trappc12
ENSRNOG00000009049	X	917818	2501704	1.58389	9.66822	5.18854	chrX_2037736	X	1687811	1704033	Usp11
ENSRNOG00000009063	15	59145163	60125120	0.979957	6.59046	5.11141	chr15_59558800	15	59990131	60056710	Dnajc15
ENSRNOG00000009069	10	65382870	66230188	0.847318	5.82681	5.05175	chr10_65761821	10	65791003	65805693	Tnfaip1
ENSRNOG00000009149	8	27564990	28423734	0.858744	23.4888	19.9449	chr8_27823495	8	28147111	28208466	Jam3
ENSRNOG00000009152	3	92799059	94583032	1.78397	8.31144	5.20767	chr3_93719549	3	93702487	93789617	Caprin1
ENSRNOG00000009199	3	82525561	82901516	0.375955	16.0807	11.2418	chr3_82803324	3	82742831	82757204	Accs
ENSRNOG00000009221	5	126147544	127100823	0.953279	10.9552	6.59636	chr5_126729279	5	126698582	126708762	Cdcp2
ENSRNOG00000009239	3	2238215	2437217	0.199002	6.57806	5.0907	chr3_2437217	3	2288667	2302782	Entpd8
ENSRNOG00000009273	5	76484329	76736643	0.252314	6.17114	5.36872	chr5_76736643	5	77245143	77492013	LOC259244
ENSRNOG00000009280	4	66720693	67791252	1.07056	23.2203	18.4693	chr4_67210818	4	67185138	67206426	Mkrn1
ENSRNOG00000009290	3	67346663	67670856	0.324193	6.01337	5.20564	chr3_67346663	3	67870111	67896153	Nup35
ENSRNOG00000009296	6	95925895	96983041	1.05715	7.36558	5.10133	chr6_96672691	6	96871625	96893444	Snapc1
ENSRNOG00000009325	5	154142382	154336953	0.194571	31.8797	27.5818	chr5_154142382	5	154269118	154286544	Fuca1
ENSRNOG00000009350	10	64984312	65788466	0.804154	25.5661	22.2103	chr10_65232401	10	64865805	64915148	Sez6
ENSRNOG00000009358	5	28898499	30616474	1.71798	6.18241	5.03645	chr5_28966275	5	29663685	29682005	Osgin2
ENSRNOG00000009372	2	239767528	240761826	0.994298	23.9954	18.9996	chr2_239773048	2	240021152	240118971	Tacr3
ENSRNOG00000009378	8	68769618	69860607	1.09099	8.89557	6.68551	chr8_69711497	8	69121682	69126805	Rpl4
ENSRNOG00000009388	2	165756095	167224196	1.4681	6.96091	5.00516	chr2_166255068	2	166654043	166682325	Sptssb
ENSRNOG00000009411	4	84327790	85429362	1.10157	7.41379	5.25653	chr4_84490853	4	84194347	84454500	Chn2
ENSRNOG00000009439	8	85599356	86232187	0.632831	19.3567	14.474	chr8_85802453	8	85838869	85840818	Eef1a1
ENSRNOG00000009448	6	107403899	107669466	0.265567	13.8701	10.0232	chr6_107403899	6	107245820	107276755	Papln
ENSRNOG00000009484	4	98934344	100738707	1.80436	8.12416	5.06448	chr4_100699166	4	99795656	99822992	Ptcd3
ENSRNOG00000009538	2	178553026	179208320	0.655294	5.86992	5.17213	chr2_178553026	2	178367549	178389608	Etfdh
ENSRNOG00000009548	2	260526309	261728051	1.20174	5.16845	5.02288	chr2_261728051	2	261382060	261402903	Fpgt
ENSRNOG00000009564	4	84327790	85429362	1.10157	17.6412	13.1719	chr4_84490853	4	84478839	84481883	Prr15
ENSRNOG00000009585	7	123128617	123738551	0.609934	7.25354	5.91114	chr7_123367385	7	123671028	123767797	Tcf20
ENSRNOG00000009592	7	123128617	124981010	1.85239	9.39842	5.03405	chr7_123780181	7	124023995	124041594	Cyb5r3
ENSRNOG00000009598	7	129392064	130466840	1.07478	7.06037	5.10927	chr7_129900395	7	130326600	130342493	Ncaph2
ENSRNOG00000009613	8	90707103	91366411	0.659308	6.44626	5.19015	chr8_91078902	8	91070073	91160258	Sh3bgrl2
ENSRNOG00000009636	4	84490853	85546883	1.05603	36.2015	32.3173	chr4_85121070	4	84678975	84740909	Scrn1
ENSRNOG00000009643	10	85796688	87710650	1.91396	9.31193	5.25772	chr10_87008148	10	86711240	86721246	Msl1
ENSRNOG00000009649	15	96655187	96784647	0.12946	24.475	19.7785	chr15_96678328	15	96821832	96826653	Slitrk5
ENSRNOG00000009683	5	19673113	20456913	0.7838	7.04728	5.15853	chr5_20013391	5	19471664	19498485	Sdcbp
ENSRNOG00000009686	5	56550682	57830040	1.27936	6.41676	5.06016	chr5_56721430	5	57358327	57372239	Aqp7
ENSRNOG00000009708	5	168201387	169599288	1.3979	13.3292	8.97868	chr5_169253397	5	169200287	169212170	Tas1r1
ENSRNOG00000009730	2	101729858	103609970	1.88011	11.7446	6.81725	chr2_102867798	2	102701903	102871257	Cyp7b1
ENSRNOG00000009734	4	61697587	62808384	1.1108	11.6429	9.13744	chr4_62101223	4	61771970	61828657	Akr1b10
ENSRNOG00000009741	5	133622763	134056288	0.433525	28.598	25.469	chr5_133622763	5	134469270	134484839	Cyp4a3
ENSRNOG00000009742	4	151470811	152068746	0.597935	6.554	5.13855	chr4_151470811	4	152430187	152451609	Rad52
ENSRNOG00000009761	5	61237272	62310396	1.07312	6.16727	5.41496	chr5_61402482	5	61657507	61712051	Tmod1
ENSRNOG00000009778	5	126257948	127684290	1.42634	8.06353	5.0691	chr5_126452797	5	126783061	126804175	Tmem59
ENSRNOG00000009797	5	56541102	57830040	1.28894	32.2227	27.3238	chr5_56920567	5	57423734	57429245	Aqp3
ENSRNOG00000009822	2	182284643	183136203	0.85156	6.19319	5.03858	chr2_182410129	2	182840727	182846061	Tlr2
ENSRNOG00000009845	2	259140884	260871242	1.73036	13.1013	8.55191	chr2_260197309	2	260124418	260148589	Acadm
ENSRNOG00000009855	6	127612590	128129224	0.516634	15.3375	10.6657	chr6_127714548	6	127766470	127772420	Serpina5
ENSRNOG00000009882	2	242256671	242661301	0.40463	6.14762	5.11599	chr2_242661301	2	241909832	242184854	Ppp3ca
ENSRNOG00000009884	7	120102226	120536931	0.434705	6.08375	5.13919	chr7_120102226	7	120153184	120156289	Lgals1
ENSRNOG00000009889	5	118254619	118770543	0.515924	6.80732	5.01467	chr5_118254619	5	118743632	118803055	Pgm1
ENSRNOG00000009893	X	917818	2037736	1.11992	16.1354	15.326	chrX_2037736	X	1275612	1287512	Uxt
ENSRNOG00000009928	8	91514682	91642239	0.127557	35.4568	34.7545	chr8_91514682	8	91464229	91656134	Bckdhb
ENSRNOG00000009932	1	132944161	133663891	0.71973	6.30895	5.19424	chr1_133226176	1	133324301	133559975	Mctp2
ENSRNOG00000009934	4	145623468	145782121	0.158653	8.56624	5.48606	chr4_145782121	4	145471454	145487426	Emc3
ENSRNOG00000009945	8	102632473	104188408	1.55594	12.5162	7.61866	chr8_104043985	8	103557364	103608913	Pls1
ENSRNOG00000009954	1	280969065	282126100	1.15704	6.91275	5.07452	chr1_281844187	1	281816407	281874511	Cacul1
ENSRNOG00000009993	8	35372792	37267984	1.89519	10.0126	5.0883	chr8_36329279	8	36321993	36374673	Dcps
ENSRNOG00000009994	8	54641803	56042278	1.40047	5.54169	5.24555	chr8_56042278	8	55062551	55087832	Dlat
ENSRNOG00000010042	15	45265869	47095567	1.8297	9.79322	5.26027	chr15_46311658	15	46008613	46134064	Wdfy2
ENSRNOG00000010045	4	156338431	157023977	0.685546	7.18693	5.32147	chr4_156703168	4	156050054	156069313	Clec4a
ENSRNOG00000010060	8	13584541	13651282	0.066741	22.8646	18.3651	chr8_13584541	8	13566739	13606040	Panx1
ENSRNOG00000010064	15	103937448	104880541	0.943093	8.51212	7.05874	chr15_104076094	15	103696557	103927592	Abcc4
ENSRNOG00000010098	6	101133001	102279893	1.14689	5.75939	5.379	chr6_101675463	6	102075632	102095201	Plek2
ENSRNOG00000010104	3	148090016	148953757	0.863741	5.52242	5.02184	chr3_148807877	3	148722955	148747208	Pofut1
ENSRNOG00000010121	2	235938073	237077595	1.13952	6.70758	5.07874	chr2_236970833	2	236233239	236345056	Lef1
ENSRNOG00000010134	6	107133280	108440592	1.30731	8.24119	5.11839	chr6_107403899	6	107460668	107467487	Acot2
ENSRNOG00000010149	8	126292845	127342714	1.04987	27.8722	22.8752	chr8_126292845	8	126437345	126495347	Cmc1
ENSRNOG00000010164	3	7054335	7093197	0.038862	14.5014	13.8112	chr3_7093197	3	7051695	7058521	Mrps2
ENSRNOG00000010188	9	63181178	63839861	0.658683	15.9186	11.2308	chr9_63570769	9	63456783	63641400	Satb2
ENSRNOG00000010204	13	52544944	52836955	0.292011	38.0391	33.3366	chr13_52836955	13	52854031	52871297	Tmem9
ENSRNOG00000010214	10	84333335	84966186	0.632851	24.3279	20.0269	chr10_84562159	10	84966989	84971009	Scrn2
ENSRNOG00000010218	6	135187419	136129483	0.942064	5.29135	5.09462	chr6_135187419	6	136004214	136011406	Eif5
ENSRNOG00000010224	1	156823005	157943936	1.12093	6.41835	6.33929	chr1_157943936	1	157573324	157660008	Rab30
ENSRNOG00000010240	8	91995646	92915171	0.919525	6.99637	5.00122	chr8_92828333	8	92937739	92942076	Tent5a
ENSRNOG00000010244	10	64984312	66230188	1.24588	22.0055	19.5989	chr10_66230188	10	65742343	65766050	Sarm1
ENSRNOG00000010252	8	64109846	64324753	0.214907	6.93178	5.08539	chr8_64324753	8	64325435	64350773	Hexa
ENSRNOG00000010260	8	54363927	55986726	1.6228	9.3265	5.2891	chr8_55476290	8	55091235	55162421	Dixdc1
ENSRNOG00000010268	2	153664531	154165913	0.501382	12.6311	10.5977	chr2_153730031	2	154604832	154639158	Vom2r44
ENSRNOG00000010280	2	24756484	25173037	0.416553	25.6316	21.0489	chr2_24872548	2	24719976	24923128	Pde8b
ENSRNOG00000010284	4	99030301	100699166	1.66887	24.2567	19.5625	chr4_100699166	4	99937558	99999902	St3gal5
ENSRNOG00000010301	4	131817356	133020163	1.20281	6.87338	5.1301	chr4_132247911	4	132068598	132111079	Eif4e3
ENSRNOG00000010325	2	264003129	264267517	0.264388	6.47294	5.16721	chr2_264267517	2	263895241	263979698	Ptger3
ENSRNOG00000010326	3	175569485	177336004	1.76652	10.4099	6.14159	chr3_176579278	3	176494768	176526018	Col20a1
ENSRNOG00000010330	6	135187419	136852972	1.66555	9.51727	5.77363	chr6_136141209	6	136041777	136129661	Mark3
ENSRNOG00000010331	15	46245862	46482309	0.236447	18.7035	14.0061	chr15_46361453	15	46316741	46337612	Ctsb
ENSRNOG00000010337	10	64934091	66011381	1.07729	33.8691	28.9938	chr10_65232401	10	65664667	65692023	Slc13a2
ENSRNOG00000010370	10	39457140	40710481	1.25334	10.1653	5.43497	chr10_40300024	10	40255776	40296470	Tnip1
ENSRNOG00000010412	5	61181685	61287723	0.106038	28.4034	23.9406	chr5_61230216	5	61474000	61542653	Ccdc180
ENSRNOG00000010472	3	109880519	111780545	1.90003	23.4635	18.5249	chr3_111342284	3	110816337	110828879	Ccdc32
ENSRNOG00000010497	5	60519449	61078554	0.559105	8.44016	5.46882	chr5_60603698	5	61425746	61467644	RGD1305807
ENSRNOG00000010512	5	126157629	127226536	1.06891	7.2855	5.13381	chr5_126959734	5	126932760	126968190	Yipf1
ENSRNOG00000010538	3	148450735	148977061	0.526326	18.7298	17.5673	chr3_148450735	3	149101243	149115209	Commd7
ENSRNOG00000010546	4	28959762	29445699	0.485937	9.46033	5.23497	chr4_28959762	4	28972434	28975419	Gngt1
ENSRNOG00000010549	7	123537762	124981010	1.44325	11.991	7.29512	chr7_124714240	7	124460358	124470609	Tspo
ENSRNOG00000010556	2	126773566	128164173	1.39061	7.30373	5.02144	chr2_128164173	2	127459012	127525437	Intu
ENSRNOG00000010558	16	1680327	2072628	0.392301	43.2303	39.0825	chr16_2072628	16	1979191	1985908	Ppif
ENSRNOG00000010593	5	72711639	74405587	1.69395	10.6653	5.93318	chr5_73429225	5	73561450	73621070	Ctnnal1
ENSRNOG00000010595	3	63363717	63874902	0.511185	9.75052	5.14205	chr3_63626309	3	63220647	63235648	Rbm45
ENSRNOG00000010602	8	5214672	6913654	1.69898	7.53409	5.11656	chr8_5860585	8	6013207	6034142	Birc2
ENSRNOG00000010624	2	23374392	24525497	1.15111	8.84427	5.01848	chr2_24099828	2	24024791	24226224	Ap3b1
ENSRNOG00000010630	1	157641019	158723392	1.08237	17.5913	12.6107	chr1_158068367	1	157701089	157750169	Prcp
ENSRNOG00000010650	6	101675463	102314229	0.638766	6.69168	5.77791	chr6_101675463	6	102215603	102262417	Plekhh1
ENSRNOG00000010658	2	263877117	265215153	1.33804	8.0658	5.09085	chr2_264904737	2	264266984	264293046	Cth
ENSRNOG00000010664	1	141758952	143700543	1.94159	14.9053	9.95285	chr1_143004877	1	142711789	142720257	Wdr73
ENSRNOG00000010702	4	2307893	3287877	0.979984	10.1134	5.1626	chr4_2928991	4	2505909	2606655	Ube3c
ENSRNOG00000010716	4	99083975	100714954	1.63098	18.382	14.0011	chr4_99668128	4	100067341	100099517	Atoh8
ENSRNOG00000010728	9	65707084	66760204	1.05312	7.9543	5.1425	chr9_65791901	9	65763437	65782513	Stradb
ENSRNOG00000010731	16	39210175	39718088	0.507913	32.7588	27.8702	chr16_39210175	16	39367692	39719187	Gpm6a
ENSRNOG00000010733	8	48105427	49596844	1.49142	9.05688	5.10417	chr8_48710964	8	48677492	48692295	Vps11
ENSRNOG00000010743	8	54641803	55699044	1.05724	15.9258	11.3234	chr8_54773715	8	55196758	55201199	Fdxacb1
ENSRNOG00000010753	1	7630871	8982538	1.35167	11.0013	6.06335	chr1_8065135	1	7816838	8038665	Aig1
ENSRNOG00000010800	6	26578425	28124816	1.54639	5.43799	5.00321	chr6_28018520	6	27555412	27582995	Hadhb
ENSRNOG00000010802	8	93587163	94720684	1.13352	15.7751	11.1118	chr8_94205730	8	93948767	94120458	Ube3d
ENSRNOG00000010821	7	120312478	120566651	0.254173	29.7919	28.3308	chr7_120312478	7	120282822	120295618	Ankrd54
ENSRNOG00000010834	7	124623305	124755724	0.132419	45.1778	43.7354	chr7_124714240	7	124680294	124751405	Mpped1
ENSRNOG00000010838	X	917818	2037736	1.11992	5.30031	5.10489	chrX_2037736	X	1379194	1390873	Araf
ENSRNOG00000010873	5	154255650	154462997	0.207347	39.3333	36.384	chr5_154462997	5	154322551	154332940	Pithd1
ENSRNOG00000010881	9	64751980	66187546	1.43557	10.3314	5.42401	chr9_65107846	9	65698712	65763273	Trak2
ENSRNOG00000010935	15	56351122	58259243	1.90812	9.23794	5.04034	chr15_57113545	15	57290849	57339760	Cpb2
ENSRNOG00000010940	8	112463625	112939355	0.47573	6.23568	5.26182	chr8_112939355	8	112594691	112676280	Acad11
ENSRNOG00000010941	2	232051324	232250457	0.199133	17.4349	16.0244	chr2_232248500	2	232104809	232137422	Tifa
ENSRNOG00000010959	1	136945465	137437446	0.491981	30.3506	26.2643	chr1_137339439	1	137333881	137359072	Klhl25
ENSRNOG00000010963	3	93088481	94803123	1.71464	7.07785	5.08058	chr3_93963582	3	94035905	94037887	RGD1563222
ENSRNOG00000010977	7	143676550	144022604	0.346054	6.88035	5.80768	chr7_143881912	7	143749221	143754054	Igfbp6
ENSRNOG00000011007	10	104623198	105746788	1.12359	16.1434	11.9045	chr10_105643908	10	105506955	105552986	Ube2o
ENSRNOG00000011025	2	242742079	243532421	0.790342	6.93057	5.51592	chr2_242995153	2	243422811	243438050	Trmt10a
ENSRNOG00000011027	8	112463625	112939355	0.47573	6.11415	5.14268	chr8_112463625	8	112578590	112594261	Uba5
ENSRNOG00000011042	9	104553269	105790025	1.23676	17.4098	12.4557	chr9_104567589	9	105531195	105655471	RGD1560925
ENSRNOG00000011052	4	85318834	85894687	0.575853	5.36666	5.02929	chr4_85894687	4	85235172	85276044	Gars
ENSRNOG00000011053	2	236553964	236796163	0.242199	32.7682	30.231	chr2_236796163	2	236414135	236431683	Cyp2u1
ENSRNOG00000011057	2	118022588	119951112	1.92852	12.4145	7.52336	chr2_119669819	2	118929738	118973698	Mfn1
ENSRNOG00000011058	1	6828086	7743076	0.91499	9.771	5.06211	chr1_7081281	1	6451810	6970040	Utrn
ENSRNOG00000011135	2	248739739	249655308	0.915569	7.19182	5.15671	chr2_249645673	2	248715281	248727741	Gtf2b
ENSRNOG00000011140	16	17470411	17599168	0.128757	24.3398	23.7723	chr16_17470411	16	17493953	17513870	Fam213a
ENSRNOG00000011142	19	38483046	39699780	1.21673	6.97881	5.21913	chr19_39182937	19	39357791	39393189	Cyb5b
ENSRNOG00000011146	2	104849699	105222298	0.372599	5.65927	5.38701	chr2_104849699	2	104916738	104958034	Gyg1
ENSRNOG00000011150	2	22403318	24032205	1.62889	7.04326	5.0458	chr2_22810679	2	23385183	23544963	Arsb
ENSRNOG00000011193	8	82146435	83309197	1.16276	6.51577	5.15027	chr8_83309197	8	83070545	83205441	Hmgcll1
ENSRNOG00000011195	3	63363717	63788721	0.425004	30.0434	25.2811	chr3_63363717	3	63489074	63507926	Prkra
ENSRNOG00000011200	2	22301664	23369173	1.06751	6.12935	5.02112	chr2_23137837	2	23236575	23256158	Bhmt
ENSRNOG00000011201	8	122489538	123197486	0.707948	10.6388	6.95427	chr8_123197486	8	122848501	122904913	Cmtm8
ENSRNOG00000011203	15	105564168	106571128	1.00696	13.9662	10.0978	chr15_105913732	15	106434177	106625837	Farp1
ENSRNOG00000011214	7	120102226	120725758	0.623532	6.72266	5.53978	chr7_120589906	7	120380544	120390954	Polr2f
ENSRNOG00000011245	1	19333370	19961262	0.627892	10.319	5.45083	chr1_19342549	1	19227121	19376301	Arhgap18
ENSRNOG00000011250	4	84927320	86220042	1.29272	6.49524	5.01315	chr4_86188950	4	85381889	85386231	Inmt
ENSRNOG00000011276	16	3505091	4801630	1.29654	6.85866	5.06968	chr16_4255243	16	3817402	3821270	Tmem254
ENSRNOG00000011287	1	250676158	252059901	1.38374	12.8522	8.06596	chr1_251532124	1	251045440	251071040	Minpp1
ENSRNOG00000011293	16	32340040	33478396	1.13836	12.7826	8.10051	chr16_33344398	16	32519924	32540217	Hpf1
ENSRNOG00000011316	15	45992305	46301965	0.30966	6.81286	5.72414	chr15_46160517	15	46613810	46643772	Fam167a
ENSRNOG00000011348	8	95978197	96524641	0.546444	6.07217	5.17453	chr8_96087493	8	96023445	96088405	Snx14
ENSRNOG00000011357	10	55573072	56492284	0.919212	27.9211	24.4661	chr10_56492284	10	56219858	56223245	Shbg
ENSRNOG00000011367	1	183644875	185066447	1.42157	6.90559	5.3517	chr1_183644875	1	184093920	184106200	Cyp2r1
ENSRNOG00000011381	8	59187452	60085561	0.898109	5.77207	5.26268	chr8_59461291	8	59184113	59239954	Acsbg1
ENSRNOG00000011413	5	127360387	128691126	1.33074	14.1976	9.85879	chr5_127488883	5	127620274	127735739	Scp2
ENSRNOG00000011419	6	108192748	108475440	0.282692	7.6445	5.25196	chr6_108402654	6	108146582	108167185	Aldh6a1
ENSRNOG00000011422	19	49390798	50098442	0.707644	5.77533	5.40739	chr19_49390798	19	49495892	49499682	AABR07043951.1
ENSRNOG00000011445	5	149154292	149286879	0.132587	5.51991	5.42322	chr5_149154292	5	148661070	148667746	Nkain1
ENSRNOG00000011446	8	127608484	128052889	0.444405	7.74636	5.06818	chr8_127633405	8	127735258	127753349	Vill
ENSRNOG00000011478	8	112518308	113016855	0.498547	20.1062	15.238	chr8_112917583	8	112644222	112648880	Ackr4
ENSRNOG00000011559	2	224554852	225267917	0.713065	16.2882	11.3728	chr2_225147651	2	225005019	225036188	Cnn3
ENSRNOG00000011584	1	90536128	92201733	1.66561	7.81023	5.19658	chr1_91902606	1	91529112	91578048	Gpatch1
ENSRNOG00000011617	4	114914595	115921367	1.00677	8.19426	5.05745	chr4_115054197	4	115180433	115208061	Dguok
ENSRNOG00000011618	19	31862310	32137901	0.275591	5.54356	5.17842	chr19_32137901	19	32308236	32325927	Mmaa
ENSRNOG00000011635	19	493932	999245	0.505313	19.245	14.3572	chr19_534598	19	85606	100424	Ces2e
ENSRNOG00000011646	15	32366565	33992205	1.62564	10.5044	5.58815	chr15_33328897	15	33121273	33125752	Rem2
ENSRNOG00000011648	4	84800469	85546883	0.746414	21.264	16.731	chr4_85460397	4	85551502	85569360	Aqp1
ENSRNOG00000011652	3	118415392	120105052	1.68966	26.4342	22.5503	chr3_119801686	3	119361655	119405453	Sppl2a
ENSRNOG00000011675	1	61589221	63182170	1.59295	9.79508	5.38318	chr1_61695285	1	62555188	62558033	Zfp40
ENSRNOG00000011690	3	110024430	111931790	1.90736	7.22248	5.43193	chr3_110036323	3	110943826	110964452	Rmdn3
ENSRNOG00000011700	9	114446768	116435969	1.9892	10.9463	5.97226	chr9_116409636	9	114846095	115555261	Ptprm
ENSRNOG00000011720	1	19342549	20963124	1.62058	7.66977	5.00824	chr1_20777586	1	20022793	20097099	L3mbtl3
ENSRNOG00000011723	2	224625772	225759905	1.13413	23.824	19.9272	chr2_225327290	2	225038582	225107283	Slc44a3
ENSRNOG00000011758	3	63367569	64286395	0.918826	7.55991	5.09433	chr3_63749912	3	63522403	63535991	Fkbp7
ENSRNOG00000011784	9	12796705	13546909	0.750204	13.2018	8.28251	chr9_13546909	9	13493709	13513960	Mocs1
ENSRNOG00000011794	5	154750027	155023257	0.27323	8.19873	5.42791	chr5_154750027	5	154598758	154634686	Tcea3
ENSRNOG00000011826	16	21297431	22985792	1.68836	27.16	22.1931	chr16_21373201	16	22250470	22306662	Lzts1
ENSRNOG00000011841	9	73296604	74420844	1.12424	8.17068	5.4008	chr9_73300634	9	73319710	73462972	Map2
ENSRNOG00000011895	1	102833268	103032891	0.199623	5.81829	5.0987	chr1_102833268	1	102716649	102741581	LOC691143
ENSRNOG00000011907	10	87165782	87881851	0.716069	13.8575	8.96669	chr10_87239707	10	87391623	87407634	Krt23
ENSRNOG00000011910	5	154336953	155023257	0.686304	7.22269	6.07407	chr5_154655412	5	154668179	154699966	Hnrnpr
ENSRNOG00000011913	2	104799584	105233050	0.433466	5.82018	5.29768	chr2_104857674	2	104744461	104799853	Cp
ENSRNOG00000011929	2	224575479	225519038	0.943559	5.78739	5.00105	chr2_224575479	2	225335718	225389120	Abcd3
ENSRNOG00000011932	1	126957663	127393775	0.436112	11.6196	7.21868	chr1_126977591	1	126961389	126974453	Snrpa1
ENSRNOG00000011946	4	64365724	64611524	0.2458	11.0541	6.0648	chr4_64377396	4	64239158	64330996	Ptn
ENSRNOG00000011953	15	28433031	29424669	0.991638	11.9863	7.55544	chr15_28596471	15	28575480	28611946	Supt16h
ENSRNOG00000011964	6	107509151	108566272	1.05712	7.51361	5.44919	chr6_108334016	6	108315035	108329464	Abcd4
ENSRNOG00000011984	17	8114670	9350790	1.23612	9.49523	5.03597	chr17_8588029	17	9109731	9117750	Cxcl14
ENSRNOG00000011994	1	13359706	14027925	0.668219	9.06174	6.09424	chr1_13863113	1	14224393	14236846	Perp
ENSRNOG00000012016	18	3073779	4140861	1.06708	10.4902	5.66268	chr18_3708369	18	3616878	3662683	Npc1
ENSRNOG00000012017	2	79299448	80694695	1.39525	7.47595	5.48467	chr2_79299448	2	80269587	80293181	Otulin
ENSRNOG00000012027	19	49392177	50471462	1.07929	38.3814	33.7741	chr19_50028549	19	49637016	49673808	Bco1
ENSRNOG00000012046	15	32366565	33992205	1.62564	9.87856	5.49128	chr15_32853613	15	33156492	33165895	Prmt5
ENSRNOG00000012067	1	228807126	229574469	0.767343	37.32	33.086	chr1_229574469	1	229003961	229019527	Fam111a
ENSRNOG00000012083	10	104721301	105746788	1.02549	13.7231	9.89018	chr10_105746788	10	105650862	105668593	St6galnac2
ENSRNOG00000012084	1	273509370	274087831	0.578461	8.41733	5.02203	chr1_273770303	1	273708212	273758442	Xpnpep1
ENSRNOG00000012085	6	108495171	108823867	0.328696	19.1025	14.1987	chr6_108495171	6	108488678	108490188	Isca2
ENSRNOG00000012121	10	64984312	66163250	1.17894	14.6504	9.83445	chr10_65232401	10	65507364	65517838	Sdf2
ENSRNOG00000012146	6	110556223	111384331	0.828108	8.15677	5.20457	chr6_111063919	6	111135349	111176918	Pomt2
ENSRNOG00000012148	2	79474598	80694695	1.2201	10.5971	5.75536	chr2_79474598	2	80473202	80667481	Trio
ENSRNOG00000012162	10	55350879	57163105	1.81223	10.6332	5.73843	chr10_56270290	10	56261637	56267213	Mpdu1
ENSRNOG00000012183	2	1784746	3500789	1.71604	7.54688	5.64574	chr2_2153456	2	2605996	2615944	Glrx
ENSRNOG00000012189	17	8455652	9364019	0.908367	6.46613	5.19494	chr17_8506425	17	8489266	8495496	Lect2
ENSRNOG00000012247	4	119622905	120574413	0.951508	12.3982	7.84461	chr4_120082899	4	119910478	119959173	Rab7a
ENSRNOG00000012271	19	9535972	10163185	0.627213	11.4117	6.70924	chr19_9535972	19	9668186	9761605	Cnot1
ENSRNOG00000012290	3	110767248	111826293	1.05905	5.46863	5.13711	chr3_110884815	3	110975923	110979957	Gchfr
ENSRNOG00000012295	7	120102226	120725758	0.623532	11.0678	7.65804	chr7_120102226	7	120519467	120559347	Pla2g6
ENSRNOG00000012315	5	160046758	160369114	0.322356	6.0683	5.31231	chr5_160318934	5	160306727	160321066	Agmat
ENSRNOG00000012325	15	2042358	4349135	2.30678	6.97389	5.06398	chr15_3132930	15	3033495	3435888	Adk
ENSRNOG00000012360	1	102724805	103250257	0.525452	10.5591	5.99232	chr1_103240184	1	102849889	102877944	Gtf2h1
ENSRNOG00000012371	19	51704	1212128	1.16042	8.37611	5.36859	chr19_662084	19	636545	645937	Car7
ENSRNOG00000012379	7	11768676	13470324	1.70165	7.03864	5.03424	chr7_12018377	7	12561324	12569143	Wdr18
ENSRNOG00000012387	1	228807126	230539835	1.73271	11.0145	6.30967	chr1_230355519	1	229519506	229552842	Glyatl2
ENSRNOG00000012390	10	13620578	14197731	0.577153	6.66806	5.26819	chr10_13683270	10	14021187	14022452	Npw
ENSRNOG00000012409	5	60233873	61335616	1.10174	5.79171	5.12292	chr5_60233873	5	60868502	60871705	Exosc3
ENSRNOG00000012427	2	157651878	158603394	0.951516	7.48397	5.32238	chr2_158143322	2	157869392	158156444	Veph1
ENSRNOG00000012436	2	243014699	244113868	1.09917	20.1274	15.5641	chr2_243229404	2	243550627	243687857	Adh6
ENSRNOG00000012440	15	46544414	48486619	1.9422	18.8157	14.8012	chr15_46544414	15	47488894	47800024	Msra
ENSRNOG00000012447	19	9642810	10067901	0.425091	25.0994	20.6796	chr19_9949870	19	9762489	9765484	Setd6
ENSRNOG00000012454	5	60200193	61078554	0.878361	7.78357	5.0064	chr5_60897862	5	60850852	60865207	Trmt10b
ENSRNOG00000012472	4	176139804	177018142	0.878338	22.0962	17.2282	chr4_176796365	4	176565694	176581952	Pyroxd1
ENSRNOG00000012486	9	38366384	39311857	0.945473	37.7362	32.8974	chr9_38969019	9	38536920	38745099	Prim2
ENSRNOG00000012494	1	161640889	163290200	1.64931	7.9299	5.06652	chr1_161809429	1	162419262	162424825	Kctd14
ENSRNOG00000012500	8	56912666	58356390	1.44372	5.71644	5.02179	chr8_58048980	8	57667472	57830504	Ddx10
ENSRNOG00000012503	5	159527493	160750828	1.22334	15.529	11.0782	chr5_160218150	5	160325107	160352927	Dnajc16
ENSRNOG00000012546	5	60233873	61402482	1.16861	10.2245	5.37352	chr5_60447885	5	60809762	60837764	Frmpd1
ENSRNOG00000012552	1	161502028	163396391	1.89436	12.4159	7.53609	chr1_162046690	1	162447680	162511355	Ints4
ENSRNOG00000012568	3	80028136	80981148	0.953012	10.8603	9.32966	chr3_80028136	3	79960301	80003032	Madd
ENSRNOG00000012584	1	161623796	162596676	0.97288	7.91984	5.00482	chr1_162596676	1	162519521	162533893	Aamdc
ENSRNOG00000012629	9	38359645	39052930	0.693285	6.53258	5.13285	chr9_38515354	9	38470298	38495176	Rab23
ENSRNOG00000012650	8	112859516	112929750	0.070234	5.28062	5.14003	chr8_112859516	8	113603533	113626893	Mrpl3
ENSRNOG00000012659	4	99285575	100699166	1.41359	15.9245	11.3299	chr4_100264682	4	100231561	100232559	Vamp5
ENSRNOG00000012664	5	60593291	61023910	0.430619	22.2999	18.6579	chr5_60593291	5	60572577	60588240	Polr1e
ENSRNOG00000012679	9	14399653	14640459	0.240806	7.78329	5.14018	chr9_14469288	9	14544677	14551519	Oard1
ENSRNOG00000012684	1	263697738	264185949	0.488211	47.0813	42.0819	chr1_263968199	1	263913854	263920962	Bloc1s2
ENSRNOG00000012721	19	32979163	34258550	1.27939	18.4422	13.6927	chr19_33655031	19	33928356	33991703	Ednra
ENSRNOG00000012747	17	7404773	8204261	0.799488	6.205	5.22132	chr17_8114670	17	7675531	7797863	Spock1
ENSRNOG00000012760	2	189059177	190665089	1.60591	5.9848	5.0077	chr2_189128002	2	189887857	189899325	Chtop
ENSRNOG00000012771	17	8728287	10377997	1.64971	7.65018	5.21619	chr17_10377997	17	9631925	9637316	Ddx41
ENSRNOG00000012772	19	38461620	39402455	0.940835	53.1344	51.2559	chr19_39402455	19	38422164	38437180	Nqo1
ENSRNOG00000012785	4	9782659	10971565	1.18891	6.2808	5.04614	chr4_9782659	4	10004848	10020022	Armc10
ENSRNOG00000012787	X	113862318	114099007	0.236689	14.3085	10.1227	chrX_114099007	X	113948654	114110062	Tmem164
ENSRNOG00000012819	2	56865078	57811796	0.946718	15.807	10.9472	chr2_57753255	2	56887987	56910238	Gdnf
ENSRNOG00000012853	19	493932	1212128	0.718196	11.4364	6.46399	chr19_493932	19	917203	939221	Tk2
ENSRNOG00000012860	19	33098122	34230285	1.13216	14.9065	10.233	chr19_33781364	19	34041219	34057159	Tmem184c
ENSRNOG00000012864	10	94910635	94914612	0.003977	5.43623	5.17387	chr10_94914612	10	94588555	94681914	Ern1
ENSRNOG00000012876	4	153841921	153868025	0.026104	5.2547	5.17608	chr4_153868025	4	153874852	153912155	Slc6a13
ENSRNOG00000012892	2	224650261	225898380	1.24812	5.60322	5.01315	chr2_225865424	2	225645568	225783287	Abca4
ENSRNOG00000012928	19	33097027	34206687	1.10966	16.9043	12.6362	chr19_33394915	19	34070632	34105610	Prmt9
ENSRNOG00000012932	4	10021323	10949982	0.928659	5.28237	5.22478	chr4_10021323	4	10295122	10421415	Ccdc146
ENSRNOG00000012937	19	39182937	40155323	0.972386	13.211	8.94043	chr19_39402455	19	39543242	39614625	Wwp2
ENSRNOG00000012956	3	154070146	154768127	0.697981	16.3569	12.306	chr3_154734855	3	154597168	154627257	Tgm2
ENSRNOG00000012972	4	148496658	148650146	0.153488	5.91203	5.04591	chr4_148650146	4	148398892	148446303	Alox5
ENSRNOG00000012975	4	99526990	101281836	1.75485	11.2243	6.51355	chr4_100298785	4	100277391	100293250	Ggcx
ENSRNOG00000012987	3	175764845	177336004	1.57116	12.6472	9.32467	chr3_176498481	3	176698305	176706896	Ptk6
ENSRNOG00000012989	5	148271277	149056616	0.785339	15.7719	11.0193	chr5_149056616	5	148470061	148492232	Serinc2
ENSRNOG00000012999	4	156389250	158187374	1.79812	10.8028	5.85647	chr4_156962403	4	157230769	157235367	Phb2
ENSRNOG00000013000	4	176140716	177018142	0.877426	18.9397	15.9973	chr4_176796365	4	176701983	176720012	Ldhb
ENSRNOG00000013003	3	176097192	176718655	0.621463	7.51401	5.86751	chr3_176097192	3	176709743	176716146	Srms
ENSRNOG00000013004	4	64696705	64720763	0.024058	33.3386	28.5023	chr4_64720763	4	65110746	65143941	Akr1d1
ENSRNOG00000013009	1	102724805	103240184	0.515379	7.37766	6.07137	chr1_102833268	1	102900286	102909707	Ldha
ENSRNOG00000013011	2	257250547	258048759	0.798212	13.2965	8.75714	chr2_257307072	2	257394818	257425242	Dnajb4
ENSRNOG00000013072	4	59093491	60405037	1.31155	6.68401	5.14133	chr4_60362144	4	59445767	59809321	Plxna4
ENSRNOG00000013135	4	10426108	11174336	0.748228	8.28866	5.04826	chr4_10587206	4	10631073	10702386	Ptpn12
ENSRNOG00000013160	1	2787941	3380672	0.592731	6.13124	5.11413	chr1_3295191	1	2782864	2846200	Sash1
ENSRNOG00000013169	10	64650040	66230188	1.58015	7.86516	5.09963	chr10_66230188	10	65418700	65424802	Traf4
ENSRNOG00000013172	3	80028136	80981148	0.953012	8.30178	7.13059	chr3_80554821	3	80004130	80012750	Nr1h3
ENSRNOG00000013201	8	114938225	115968726	1.0305	6.51281	5.18924	chr8_114938225	8	115360713	115388266	Tex264
ENSRNOG00000013215	16	46588709	48207851	1.61914	10.6124	5.70073	chr16_46588709	16	47177145	47208110	Dctd
ENSRNOG00000013229	8	96566117	96791110	0.224993	5.68525	5.02303	chr8_96661187	8	96564877	96614348	Mthfs
ENSRNOG00000013236	15	2298555	3665539	1.36698	5.24223	5.00291	chr15_2692703	15	2685511	2731462	Samd8
ENSRNOG00000013238	9	26335088	28083053	1.74796	22.3392	17.7083	chr9_27325918	9	27333956	27351295	LOC103693210
ENSRNOG00000013256	1	212620175	214313215	1.69304	11.561	6.64422	chr1_213182291	1	213606599	213612904	Ric8a
ENSRNOG00000013257	9	59507480	61629047	2.12157	8.5307	5.0745	chr9_60416061	9	60457215	60672246	Hecw2
ENSRNOG00000013260	16	18801577	19395443	0.593866	33.118	30.9827	chr16_19168111	16	19097391	19124062	Calr3
ENSRNOG00000013269	2	112075619	113963396	1.88778	9.91043	5.26634	chr2_113084147	2	113007549	113026899	Tnfsf10
ENSRNOG00000013286	9	45577935	45814527	0.236592	6.65828	5.89506	chr9_45814527	9	45672157	45680799	Pdcl3
ENSRNOG00000013291	1	263959934	264254017	0.294083	5.98427	5.06094	chr1_264115482	1	263778516	263803150	Cyp2c23
ENSRNOG00000013293	2	122259942	122433908	0.173966	5.61038	5.28666	chr2_122433908	2	122550775	122690617	Mccc1
ENSRNOG00000013309	1	260303471	261615619	1.31215	5.68058	5.09803	chr1_260815293	1	260527781	260638915	Pik3ap1
ENSRNOG00000013321	X	121770297	123430364	1.66007	20.6901	16.2859	chrX_123157969	X	122507374	122690465	Dock11
ENSRNOG00000013353	15	24928082	26223022	1.29494	11.9713	7.07482	chr15_25338100	15	25294425	25361623	Tmem260
ENSRNOG00000013358	1	161809233	162888653	1.07942	14.7032	10.441	chr1_161913287	1	162703442	162713610	Aqp11
ENSRNOG00000013379	4	147769912	149608564	1.83865	7.41151	5.01761	chr4_149408384	4	148757363	148761547	Zfp422
ENSRNOG00000013387	1	218412962	219183190	0.770228	11.1202	6.93796	chr1_218881077	1	218419184	218448877	Tpcn2
ENSRNOG00000013419	8	59433124	60085116	0.651992	17.0775	12.9297	chr8_59804230	8	59507990	59529366	Hykk
ENSRNOG00000013422	1	20774248	22115270	1.34102	11.0654	6.09072	chr1_21557056	1	21539765	21586910	Med23
ENSRNOG00000013428	4	65186999	66616686	1.42969	13.3319	8.34506	chr4_66272005	4	65736585	65818521	Atp6v0a4
ENSRNOG00000013431	4	10287504	11312555	1.02505	7.42898	5.07473	chr4_10426108	4	10748745	10809142	Rsbn1l
ENSRNOG00000013439	1	263268427	264481779	1.21335	11.3107	6.35328	chr1_263697738	1	263733519	263762785	Cpn1
ENSRNOG00000013464	18	37435573	39136290	1.70072	8.17141	5.10431	chr18_37540335	18	38221681	38242119	Spink1
ENSRNOG00000013469	17	25965150	27114126	1.14898	24.5883	21.5399	chr17_27114126	17	26925828	26953970	Txndc5
ENSRNOG00000013498	5	165188321	165563465	0.375144	6.8892	5.64939	chr5_165188321	5	165782895	165918445	Pex14
ENSRNOG00000013515	5	149948684	150309824	0.36114	14.7585	10.457	chr5_150251742	5	149922352	149996334	Ptpru
ENSRNOG00000013521	2	21717887	22825525	1.10764	46.0775	41.9021	chr2_22017839	2	21931493	21962453	Dhfr
ENSRNOG00000013548	1	77113285	77763410	0.650125	6.78938	5.37792	chr1_77430891	1	77533148	77535681	Selenow
ENSRNOG00000013555	2	43535451	44178766	0.643315	5.52476	5.05139	chr2_43652896	2	44096061	44196605	Ankrd55
ENSRNOG00000013557	9	73704254	74985722	1.28147	15.3938	11.3591	chr9_74063890	9	74014656	74048244	Lancl1
ENSRNOG00000013562	18	31991175	32588153	0.596978	6.1148	5.22851	chr18_32281924	18	31574821	31625274	Ndfip1
ENSRNOG00000013583	9	45710984	45815125	0.104141	5.7026	5.04381	chr9_45815125	9	46090019	46206605	Tbc1d8
ENSRNOG00000013585	8	105697909	106461122	0.763213	13.1419	8.4498	chr8_106064331	8	106317124	106429522	Nmnat3
ENSRNOG00000013589	4	150219631	150271307	0.051676	5.48695	5.45395	chr4_150219631	4	149261044	149273891	Cxcl12
ENSRNOG00000013653	17	8728287	9962859	1.23457	19.5724	15.0702	chr17_9239337	17	9653561	9668712	Pdlim7
ENSRNOG00000013669	8	113773417	114057391	0.283974	6.4601	5.17955	chr8_114057391	8	114300257	114350681	Pik3r4
ENSRNOG00000013673	2	21677915	22830964	1.15305	6.71465	5.00687	chr2_22084425	2	21790044	21931720	Msh3
ENSRNOG00000013719	2	218188517	218927623	0.739106	6.18408	5.11329	chr2_218188517	2	218834034	218866761	Dph5
ENSRNOG00000013729	4	65186999	66389853	1.20285	27.6043	22.8006	chr4_65346880	4	65834035	65962539	RGD1306271
ENSRNOG00000013738	18	51752175	51991851	0.239676	26.5299	23.4907	chr18_51932068	18	52031842	52047816	LOC100174910
ENSRNOG00000013742	19	12528195	13336938	0.808743	5.52432	5.04866	chr19_13190504	19	12481540	12942963	Large1
ENSRNOG00000013748	9	14373632	15561121	1.18749	8.16941	5.08657	chr9_14832629	9	14713935	14724093	Trem3
ENSRNOG00000013764	7	125338936	125954904	0.615968	5.66664	5.08547	chr7_125830896	7	125937928	125964453	Fam118a
ENSRNOG00000013771	2	250909260	251332862	0.423602	47.4454	44.4163	chr2_251050149	2	250954397	250981623	Clca2
ENSRNOG00000013773	17	13157782	13482381	0.324599	8.43922	5.06736	chr17_13482381	17	13555349	13586554	Secisbp2
ENSRNOG00000013774	18	51141455	52534569	1.39311	9.58635	5.0022	chr18_51955692	18	51785111	51822264	Lmnb1
ENSRNOG00000013781	9	26687744	28083053	1.39531	7.19798	5.04986	chr9_27922294	9	27562959	27761733	Kcnq5
ENSRNOG00000013794	8	105704426	106227295	0.522869	57.2749	52.2975	chr8_106064331	8	106449321	106470842	Rbp1
ENSRNOG00000013808	19	36842460	37822382	0.979922	21.2751	16.5252	chr19_37316582	19	37025375	37034285	Ces2g
ENSRNOG00000013825	5	155792998	156167493	0.374495	15.255	10.8273	chr5_155792998	5	156026911	156074395	Rap1gap
ENSRNOG00000013828	1	212628977	214565921	1.93694	16.642	12.2708	chr1_212643601	1	213613513	213635546	Sirt3
ENSRNOG00000013867	18	32249628	33038648	0.78902	18.9445	14.4155	chr18_32305288	18	32273770	32359824	Fgf1
ENSRNOG00000013877	1	128678664	129386409	0.707745	21.9974	19.4752	chr1_129033670	1	128606770	128687893	Ttc23
ENSRNOG00000013925	1	150187865	151692105	1.50424	6.1516	5.01551	chr1_150781562	1	150797084	150976194	Nox4
ENSRNOG00000013944	4	65186999	66571177	1.38418	7.03607	5.56918	chr4_66571177	4	65990564	66002444	Zc3hav1l
ENSRNOG00000013954	5	155938109	156090189	0.15208	5.48744	5.43112	chr5_156090189	5	156086497	156141537	Alpl
ENSRNOG00000013973	3	11469420	11864846	0.395426	41.2505	38.6706	chr3_11469420	3	11414186	11417546	Lcn2
ENSRNOG00000013977	9	64332042	65899075	1.56703	7.82566	5.04436	chr9_65107846	9	65279675	65291651	Bzw1
ENSRNOG00000013994	1	20776370	21662112	0.885742	20.7054	16.1824	chr1_20776370	1	21748261	21813371	Enpp1
ENSRNOG00000014027	10	58122590	59770583	1.64799	5.60028	5.12032	chr10_59565494	10	58729306	58771908	RGD1304728
ENSRNOG00000014030	1	127955911	128803610	0.847699	18.5803	13.6691	chr1_128803610	1	128692112	128722048	Synm
ENSRNOG00000014059	2	250820742	251320315	0.499573	6.60931	5.22326	chr2_251038696	2	250995517	251048566	Odf2l
ENSRNOG00000014078	1	264260248	264293861	0.033613	26.6165	24.5419	chr1_264293861	1	264298669	264303762	Ndufb8
ENSRNOG00000014087	19	10210023	11064608	0.854585	24.69	21.4173	chr19_10985061	19	10320604	10339178	Kifc3
ENSRNOG00000014118	16	49411631	49811355	0.399724	10.0882	5.17687	chr16_49606335	16	50152008	50175458	Klkb1
ENSRNOG00000014130	17	13145583	13482381	0.336798	12.5043	8.0372	chr17_13448028	17	13587665	13593423	Cks2
ENSRNOG00000014154	2	189059177	190486673	1.4275	6.61799	5.03537	chr2_189909565	2	189857587	189877743	Ilf2
ENSRNOG00000014162	9	41127892	41129895	0.002003	6.2162	5.47586	chr9_41127892	9	41348449	41381101	Plekhb2
ENSRNOG00000014178	2	122007535	123046183	1.03865	45.7265	40.8974	chr2_123046183	2	122782060	122805768	Acad9
ENSRNOG00000014190	1	29279312	29550987	0.271675	8.92615	5.26902	chr1_29279312	1	29413365	29423347	Hint3
ENSRNOG00000014233	10	87925683	88120073	0.19439	5.3738	5.03853	chr10_88120073	10	88055841	88060561	Krt19
ENSRNOG00000014235	3	176097192	177336004	1.23881	9.54378	5.02782	chr3_176799632	3	176865156	176881549	Zgpat
ENSRNOG00000014237	15	1899808	3132930	1.23312	26.2206	21.8896	chr15_2407396	15	2374582	2378370	Zfp503
ENSRNOG00000014251	1	162177270	163827942	1.65067	8.45522	5.14434	chr1_162339345	1	163073124	163129641	Capn5
ENSRNOG00000014303	1	1521157	2370907	0.84975	9.89235	5.07254	chr1_2361293	1	1702696	1731210	Lrp11
ENSRNOG00000014357	5	144970744	145748975	0.778231	21.989	17.45	chr5_145036712	5	145374690	145377221	Gja4
ENSRNOG00000014365	5	58628387	60049838	1.42145	17.1495	12.2614	chr5_59889700	5	59512872	59553416	Gne
ENSRNOG00000014426	18	46589137	47491782	0.902645	16.0317	12.4078	chr18_47491782	18	47500330	47577819	Lox
ENSRNOG00000014453	2	122486400	124045514	1.55911	51.9641	47.1776	chr2_123223111	2	123162461	123193130	Anxa5
ENSRNOG00000014461	19	54879170	55514934	0.635764	18.035	13.0699	chr19_55371973	19	55389462	55423150	Galns
ENSRNOG00000014465	1	113722440	114174577	0.452137	22.0048	17.5081	chr1_114122850	1	114679537	114987433	Oca2
ENSRNOG00000014504	9	46081061	47504180	1.42312	7.99794	5.0109	chr9_46484208	9	46962288	47036670	Il1r1
ENSRNOG00000014509	15	41199301	42468239	1.26894	9.32955	5.08678	chr15_41587875	15	41448064	41530398	Sacs
ENSRNOG00000014513	1	189501943	190611871	1.10993	7.48324	5.18605	chr1_189632366	1	189549960	189622094	Rexo5
ENSRNOG00000014522	19	51869859	52339985	0.470126	7.78343	5.49269	chr19_52130628	19	52032886	52048753	Mlycd
ENSRNOG00000014530	1	104250872	105346434	1.09556	9.48303	5.40238	chr1_104986582	1	104576589	104941552	Nav2
ENSRNOG00000014595	6	136805787	138151250	1.34546	8.35524	5.0166	chr6_137789999	6	137765122	137808303	Brf1
ENSRNOG00000014604	5	57206443	58969295	1.76285	27.4896	22.9769	chr5_57830040	5	58121786	58124681	Sigmar1
ENSRNOG00000014605	16	84843216	85552596	0.70938	19.3189	15.374	chr16_84964240	16	85331866	85337769	Lig4
ENSRNOG00000014610	1	140688757	142597612	1.90885	9.99256	5.39172	chr1_141876295	1	141561334	141604273	Anpep
ENSRNOG00000014617	4	99641555	101392035	1.75048	18.7988	13.8799	chr4_101106528	4	100475416	100483168	Tgoln2
ENSRNOG00000014623	10	94039829	96038501	1.99867	9.56981	5.04905	chr10_94914612	10	95018059	95062987	Smurf2
ENSRNOG00000014637	7	126123951	127005422	0.881471	13.0757	8.1675	chr7_126123951	7	126228295	126351634	Atxn10
ENSRNOG00000014642	5	172029599	172730494	0.700895	6.83975	5.35975	chr5_172730494	5	172488708	172547058	Morn1
ENSRNOG00000014647	19	36734831	37996466	1.26164	6.49075	5.11266	chr19_37996466	19	37127508	37171069	Cbfb
ENSRNOG00000014652	1	193408234	194183986	0.775752	6.28103	5.04433	chr1_194183986	1	193424812	193430676	Aqp8
ENSRNOG00000014659	15	41307360	41927465	0.620105	16.328	11.4411	chr15_41559876	15	41668119	41691518	Ebpl
ENSRNOG00000014668	19	36548427	37838079	1.28965	7.21053	5.07774	chr19_36919479	19	37179814	37215404	RGD621098
ENSRNOG00000014691	1	172725628	174093771	1.36814	6.08527	5.15166	chr1_172773539	1	173630761	173682226	Ric3
ENSRNOG00000014702	17	21611387	21748084	0.136697	25.191	23.3431	chr17_21748084	17	21382455	21422407	Elovl2
ENSRNOG00000014711	10	13764962	14770582	1.00562	26.4448	21.4683	chr10_14197731	10	14174732	14206025	Meiob
ENSRNOG00000014712	10	44267829	45368908	1.10108	31.2273	26.3749	chr10_45233111	10	45220282	45243672	Zfp39
ENSRNOG00000014713	4	150108071	150558767	0.450696	6.03015	5.16853	chr4_150108071	4	150153844	150185044	Csgalnact2
ENSRNOG00000014719	8	30647371	31580692	0.933321	10.2044	5.3031	chr8_31332822	8	31497639	31534077	Snx19
ENSRNOG00000014727	10	14109097	14418781	0.309684	40.5484	38.8787	chr10_14197731	10	14214519	14215957	Fahd1
ENSRNOG00000014739	3	160782322	161670592	0.88827	9.22785	5.12907	chr3_160875935	3	161018511	161024209	Wfdc2
ENSRNOG00000014742	10	62638494	63214893	0.576399	9.07236	5.32399	chr10_62638494	10	62674561	62690845	Ankrd13b
ENSRNOG00000014743	10	14109097	14513227	0.40413	53.5456	50.2958	chr10_14418781	10	14216155	14230515	Hagh
ENSRNOG00000014762	5	139944182	141803193	1.85901	9.29866	5.11463	chr5_140672421	5	140822141	140834959	Ppie
ENSRNOG00000014766	5	57206443	59020859	1.81442	14.9273	10.01	chr5_58447048	5	58144705	58147929	Galt
ENSRNOG00000014779	1	273636897	274840613	1.20372	8.86099	5.21388	chr1_274207687	1	274625224	274648204	Pdcd4
ENSRNOG00000014787	1	75192829	76364316	1.17149	24.7171	19.7764	chr1_76027760	1	75693232	75706069	Cabp5
ENSRNOG00000014798	3	80028136	81173206	1.14507	48.2058	43.9572	chr3_80554821	3	80095042	80349145	RGD1309540
ENSRNOG00000014844	7	131097390	133103553	2.00616	10.938	5.98426	chr7_132303880	7	132071116	132143470	Kif21a
ENSRNOG00000014870	10	57927847	59825182	1.89733	8.7481	5.28553	chr10_58122590	10	58810058	58834538	Slc13a5
ENSRNOG00000014886	17	78182413	78611368	0.428955	16.5515	11.656	chr17_78388300	17	78489668	78561613	Fam107b
ENSRNOG00000014925	1	141028914	142430302	1.40139	7.52447	5.24173	chr1_141028914	1	141550633	141553230	Mesp2
ENSRNOG00000014946	1	188911150	190434465	1.52331	8.46911	5.09662	chr1_190434465	1	189457583	189460844	AABR07005588.1
ENSRNOG00000015021	16	82900495	83450640	0.550145	32.6501	28.3364	chr16_83391058	16	83326301	83342667	Naxd
ENSRNOG00000015061	10	13620578	15192207	1.57163	9.55158	5.00623	chr10_14076120	10	14240219	14243597	Igfals
ENSRNOG00000015063	19	42097604	42268156	0.170552	17.4625	12.4745	chr19_42097604	19	42066351	42082012	Dhodh
ENSRNOG00000015068	5	57152405	59029956	1.87755	11.0839	6.56454	chr5_58334949	5	58151985	58159072	Il11ra1
ENSRNOG00000015072	5	75799749	76480373	0.680624	34.8483	33.2062	chr5_76128084	5	76110738	76129441	Ptgr1
ENSRNOG00000015078	1	213182291	214754512	1.57222	24.1342	19.3707	chr1_213628153	1	213810696	213811901	Ifitm3
ENSRNOG00000015089	2	251977263	252105281	0.128018	20.9107	16.8015	chr2_252059117	2	252018597	252068271	Mcoln2
ENSRNOG00000015093	14	6503544	7987206	1.48366	14.5181	9.54488	chr14_6874984	14	6994190	7025308	Sparcl1
ENSRNOG00000015105	5	78062662	78859068	0.796406	14.103	11.1066	chr5_78720711	5	78334284	78356460	Bspry
ENSRNOG00000015113	18	16212842	17190650	0.977808	27.5538	22.6912	chr18_16609221	18	16590197	16636084	Mocos
ENSRNOG00000015118	10	2827003	4728035	1.90103	6.97232	5.23571	chr10_2827003	10	3655038	3774884	Cpped1
ENSRNOG00000015121	19	21985018	22014759	0.029741	5.24388	5.16086	chr19_22014759	19	21218465	21266964	N4bp1
ENSRNOG00000015124	1	275247579	276817366	1.56979	7.30592	5.31404	chr1_275977386	1	275846819	275906686	Gpam
ENSRNOG00000015139	17	8785932	10649513	1.86358	7.29178	5.01594	chr17_9925017	17	9736577	9744420	F12
ENSRNOG00000015148	16	3505091	4298654	0.793563	7.4519	5.08625	chr16_4294429	16	3293599	3679222	Erc2
ENSRNOG00000015152	1	212893010	214886525	1.99351	9.0145	5.0397	chr1_214313215	1	213886775	213897783	Pkp3
ENSRNOG00000015162	19	20894327	22403687	1.50936	12.8194	8.10786	chr19_21993845	19	21400740	21492556	Lonp2
ENSRNOG00000015179	19	36565459	37838079	1.27262	21.2114	16.6807	chr19_37629742	19	37214471	37216572	Tradd
ENSRNOG00000015195	5	78331872	78720711	0.388839	6.42719	5.09739	chr5_78673456	5	78358203	78361647	Hdhd3
ENSRNOG00000015226	2	202037692	203431565	1.39387	7.79428	5.03759	chr2_203022695	2	202891537	203043847	Man1a2
ENSRNOG00000015231	9	84649221	86479535	1.83031	7.64938	5.42884	chr9_85443873	9	85542702	85548144	Mrpl44
ENSRNOG00000015237	3	7841854	9302236	1.46038	6.45819	5.00083	chr3_8738323	3	8498122	8526771	Gle1
ENSRNOG00000015242	19	36486378	37838079	1.3517	7.72177	5.14365	chr19_36842460	19	37221132	37226065	Fbxl8
ENSRNOG00000015253	19	36746858	37698612	0.951754	6.2065	5.32806	chr19_36860620	19	37226186	37231912	Hsf4
ENSRNOG00000015260	2	251977263	252105281	0.128018	18.5899	13.8281	chr2_252063177	2	252090669	252159903	Lpar3
ENSRNOG00000015268	1	246176443	247418727	1.24228	9.91612	5.50819	chr1_246598626	1	247084228	247087077	Plpp6
ENSRNOG00000015285	3	79914944	81371551	1.45661	12.5714	7.95988	chr3_80028136	3	80362858	80416679	Lrp4
ENSRNOG00000015292	17	56527852	57367405	0.839553	40.093	35.355	chr17_56874534	17	56952480	56992694	Cul2
ENSRNOG00000015347	2	202319007	203936833	1.61783	25.5226	21.0567	chr2_203845925	2	203301838	203310532	Trim45
ENSRNOG00000015353	2	227187716	227751218	0.563502	7.87116	5.02768	chr2_227696711	2	227657983	227717884	Prss12
ENSRNOG00000015354	9	63990765	65936068	1.9453	32.4017	27.6006	chr9_65936068	9	64929721	65007870	Aox1
ENSRNOG00000015368	1	188208327	190236961	2.02863	12.5105	7.7705	chr1_189163601	1	189207165	189238776	Pdilt
ENSRNOG00000015386	9	14595148	16579590	1.98444	9.27242	6.11663	chr9_15818029	9	15582564	15604100	AABR07066762.1
ENSRNOG00000015425	2	252185614	253053939	0.868325	32.9524	28.0004	chr2_252185614	2	252263386	252296051	Ssx2ip
ENSRNOG00000015438	19	14090956	15301479	1.21052	11.0855	6.47885	chr19_15196868	19	15081158	15335002	Ces1f
ENSRNOG00000015449	2	28761889	28802364	0.040475	5.63362	5.42283	chr2_28802364	2	28791875	28801223	Tmem171
ENSRNOG00000015473	1	6519446	7764738	1.24529	12.3042	7.53757	chr1_7303107	1	7355154	7480825	Phactr2
ENSRNOG00000015480	5	172825006	173358345	0.533339	15.908	11.8618	chr5_173016282	5	172658748	172769421	Prkcz
ENSRNOG00000015496	16	18801577	20076112	1.27453	6.23913	5.06617	chr16_20076112	16	19385736	19399903	Tpm4
ENSRNOG00000015519	19	15367389	15422122	0.054733	24.8704	24.1361	chr19_15422122	19	15033108	15239821	Ces1d
ENSRNOG00000015538	7	131579623	132497980	0.918357	19.3568	14.4478	chr7_132113173	7	132294562	132343169	Abcd2
ENSRNOG00000015546	18	16204297	17190650	0.986353	13.8798	8.93279	chr18_16985340	18	16438091	16445505	MGC116121
ENSRNOG00000015551	1	7416631	7797620	0.380989	46.6344	43.3815	chr1_7632023	1	7658890	7673683	Fuca2
ENSRNOG00000015562	5	24604586	25805526	1.20094	31.7066	27.0302	chr5_25805526	5	25391115	25443718	Cdh17
ENSRNOG00000015581	4	100899117	101219420	0.320303	20.5237	19.32	chr4_101061694	4	100936978	101156576	Dnah6
ENSRNOG00000015583	7	121026448	121132409	0.105961	5.24204	5.02929	chr7_121132409	7	120987452	121000272	Dnal4
ENSRNOG00000015590	19	51866083	52767186	0.901103	7.79244	5.56222	chr19_52121296	19	52217984	52245929	Dnaaf1
ENSRNOG00000015593	1	213628153	214836999	1.20885	45.5368	41.4384	chr1_214313215	1	213898401	213907144	Sigirr
ENSRNOG00000015596	9	93919152	95404823	1.48567	8.21081	5.24273	chr9_95404823	9	94362299	94408885	Efhd1
ENSRNOG00000015615	13	24778523	26379877	1.60135	30.8567	25.9479	chr13_26196128	13	25778317	25835957	Tnfrsf11a
ENSRNOG00000015622	2	53416287	54119747	0.70346	14.5382	9.70889	chr2_54119747	2	53797954	53811134	Fbxo4
ENSRNOG00000015636	3	7760759	9586338	1.82558	6.60661	5.0705	chr3_9214151	3	8599148	8615532	Wdr34
ENSRNOG00000015654	2	52193083	54168127	1.97504	8.21435	5.1987	chr2_53904096	2	53150370	53413638	Ghr
ENSRNOG00000015660	1	7686726	7993998	0.307272	5.61172	5.18948	chr1_7686726	1	7685338	7726401	Pex3
ENSRNOG00000015666	19	21655830	22014759	0.358929	5.23182	5.00134	chr19_22014759	19	21541742	21612527	Abcc12
[truncated: 1,250 more rows]

## Sheet: Supp.Table6.Cis-eQTLs_Fat
Supplementary Table 6. Genes mapped with cis-eQTLs in Adipose
[truncated: 2,228 more rows]

[truncated: 2 more sheets: Supp.Table7.Cis-eQTLs_combined, Supp.Table8.Phe_GE_corr]
