# Supplementary material
Source: publisher figshare collection journal article supplement (https://diabetesjournals.figshare.com/articles/dataset/_/21295908)
Supplement: Supplementary file 3 [file 1]

**Supplementary. Figure 2** – Haplotype plots that are zoomed in for pQTLs that are **likely pleiotropic** (A-F) for multiple physiological traits: (A) pQTLs on Chr1:180Mb for TRIG, EpiFat/BW and RetroFat/BW; (B) pQTLs on Chr6:27Mb for CHOL, TRIG and RetroFat/BW; (C) pQTLs on Chr8:50Mb for CHOL and TRIG; (D) pQTLs on Chr10:101Mb for WPIC and EpiFat/BW; (E) pQTLs on Chr16:17Mb for BW and RetroFat/BW; (F) pQTLs on Chr19:52Mb for BW, BLNoTail and EpiFat.

Haplotype plots that are zoomed in for pQTLs that are **unlikely pleiotropic** (D, G) for multiple physiological traits: (D) pQTLs on Chr10:101Mb for BWGain versus WPIC and EpiFat/BW; (G) pQTLs on Chr20:6-8Mb for TotKid/BW and EpiFat/BW.

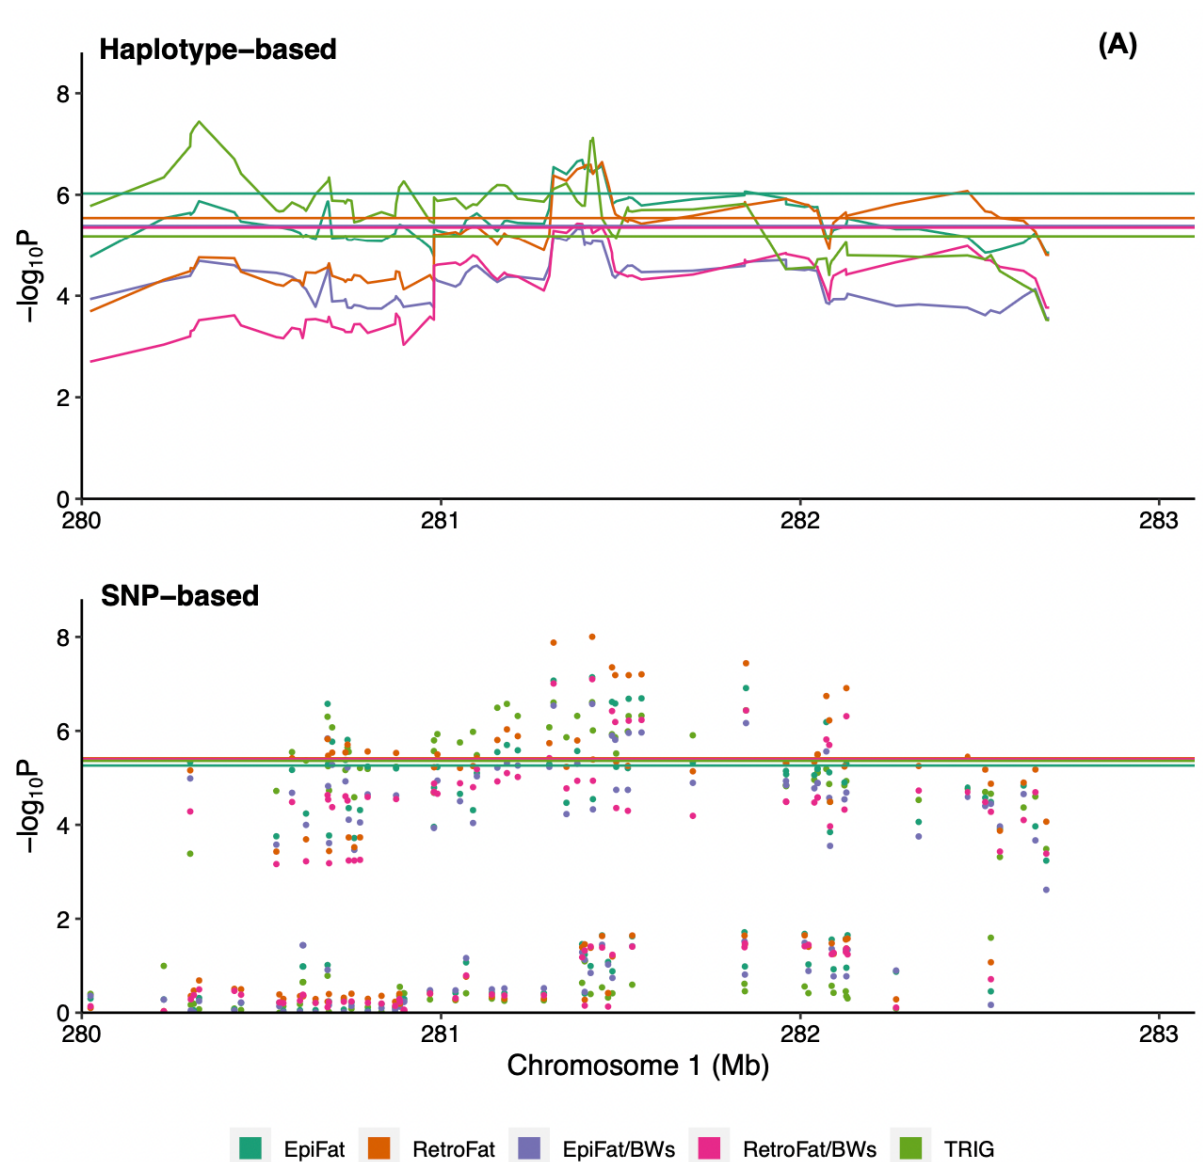

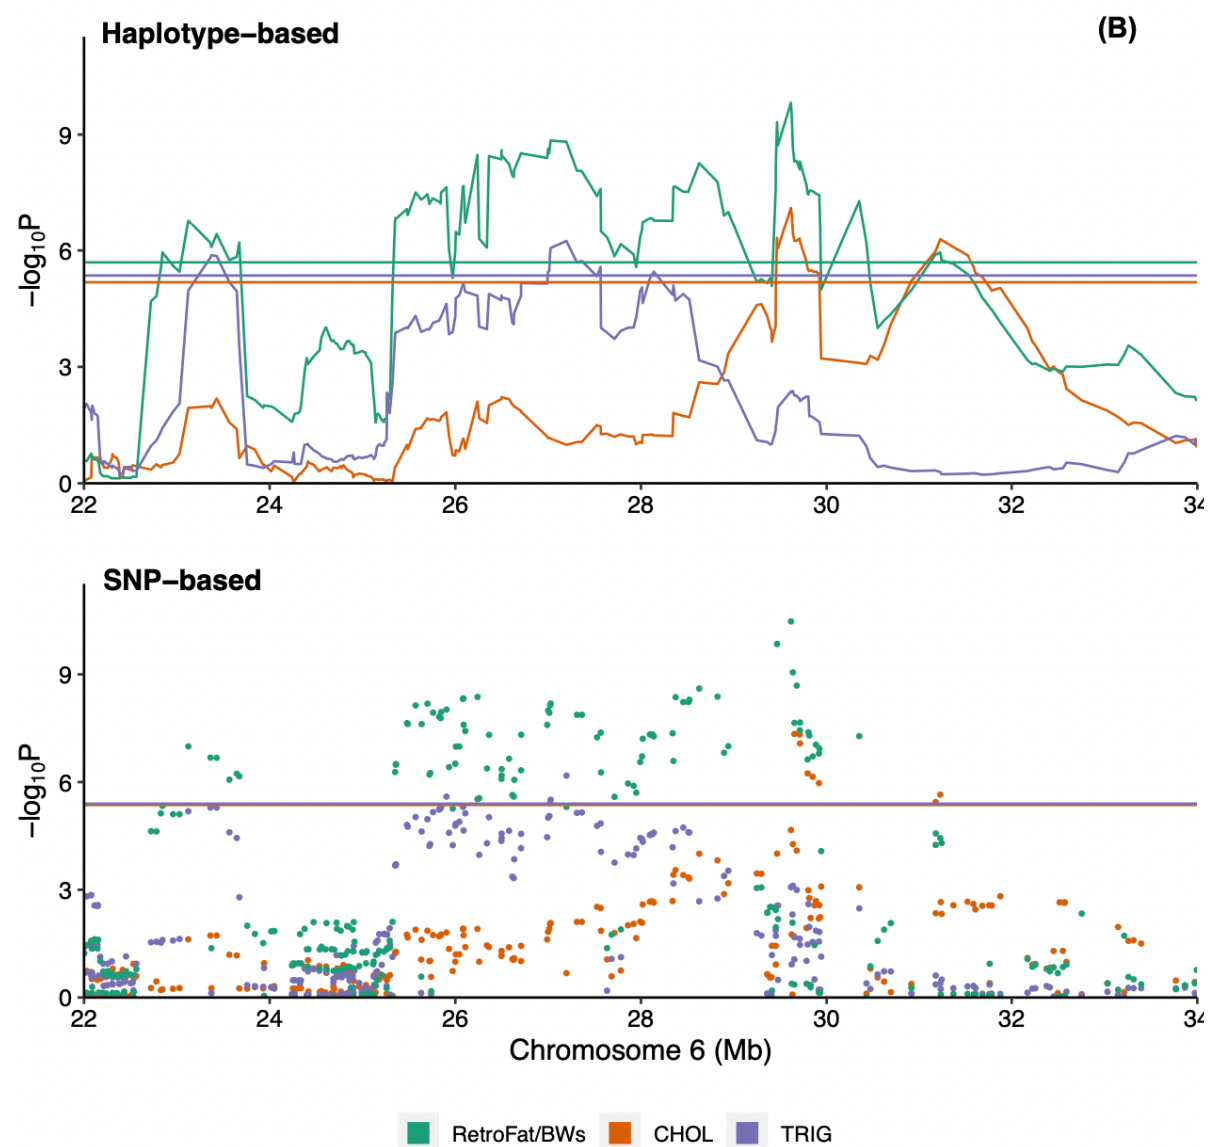

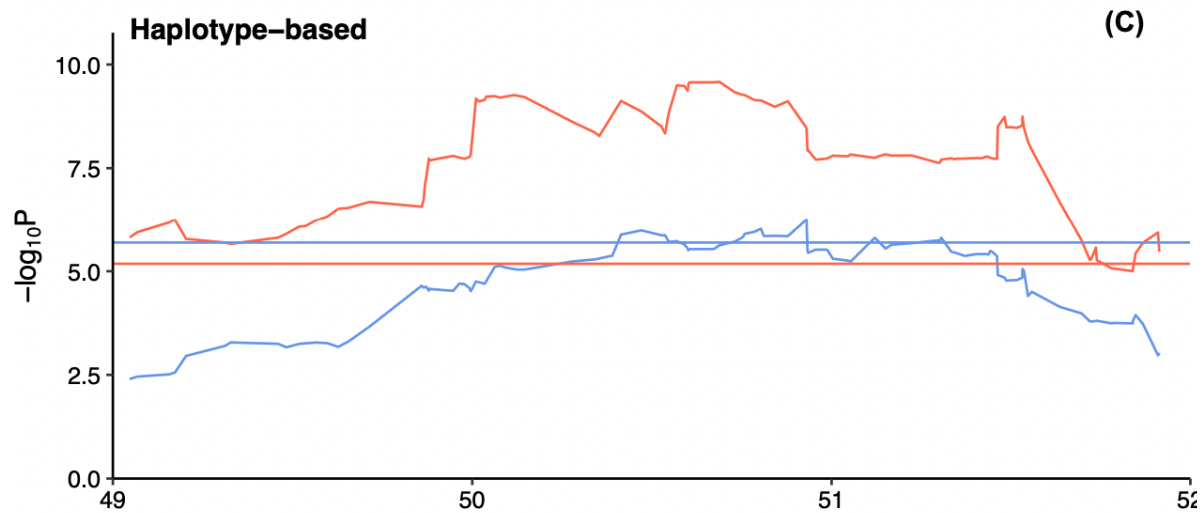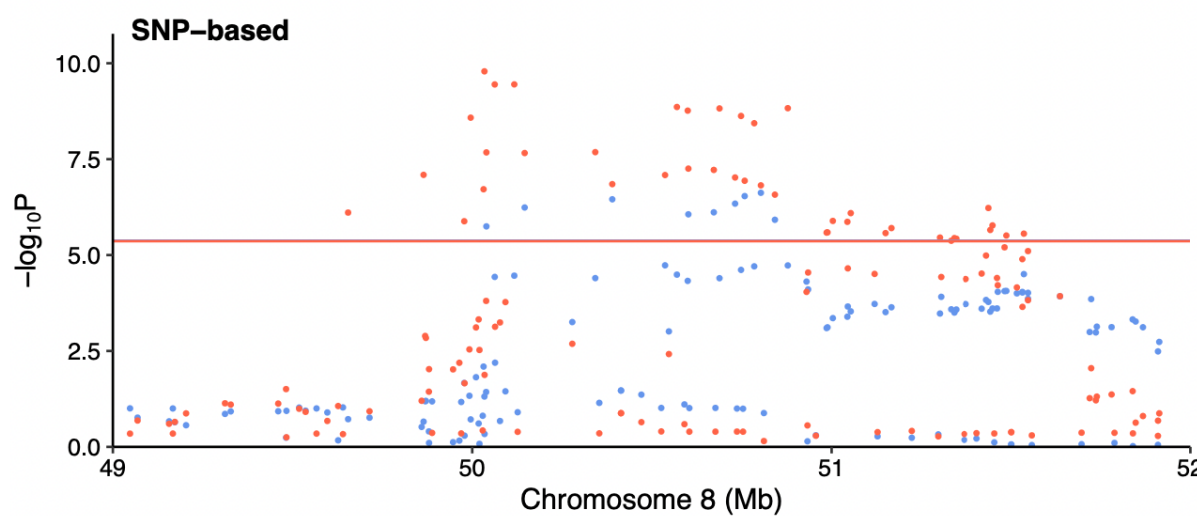

CHOL TRIG

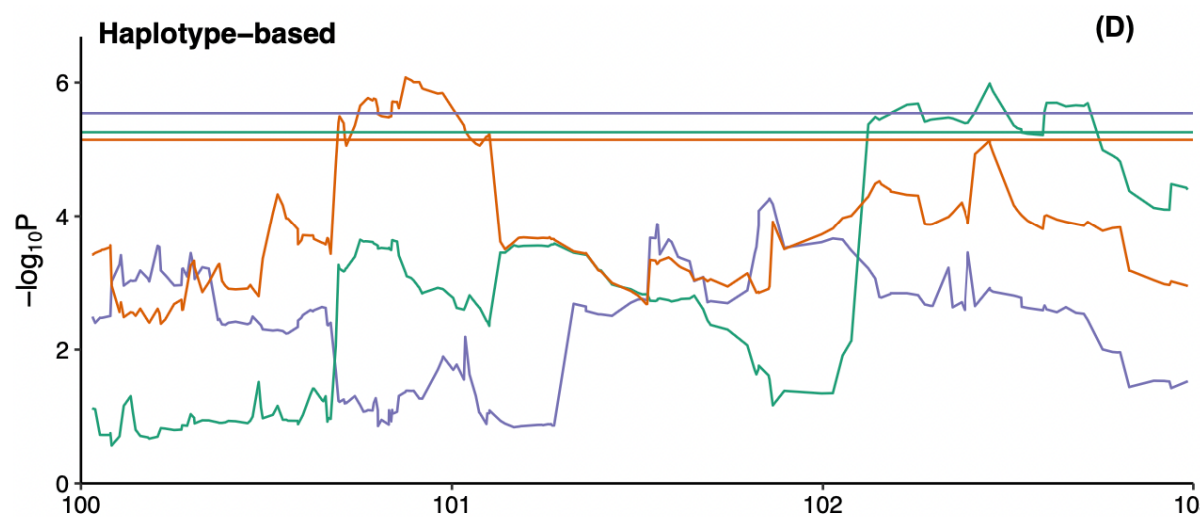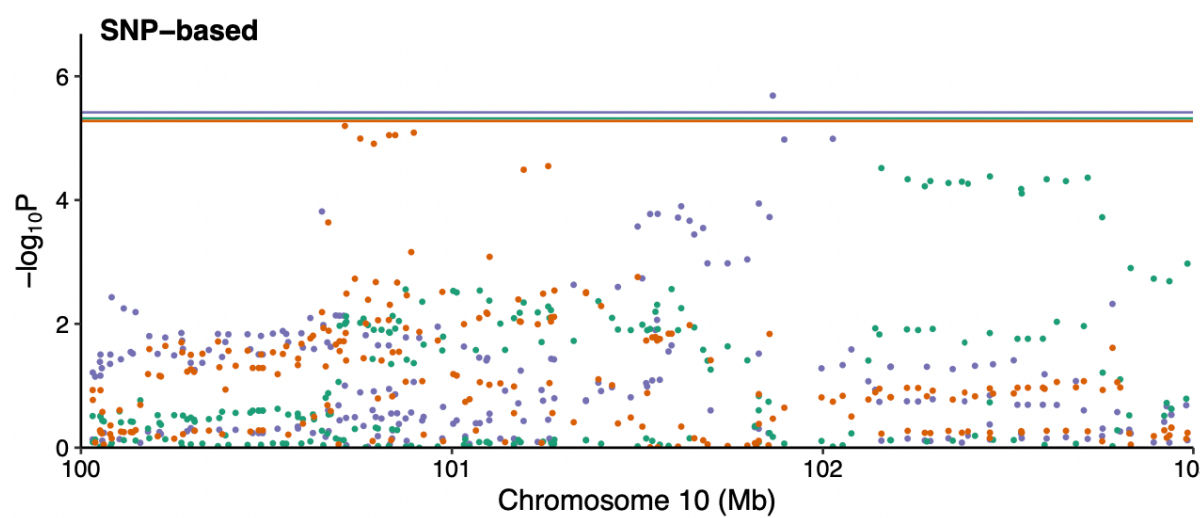

EpiFat/BWs WPIC BWGain

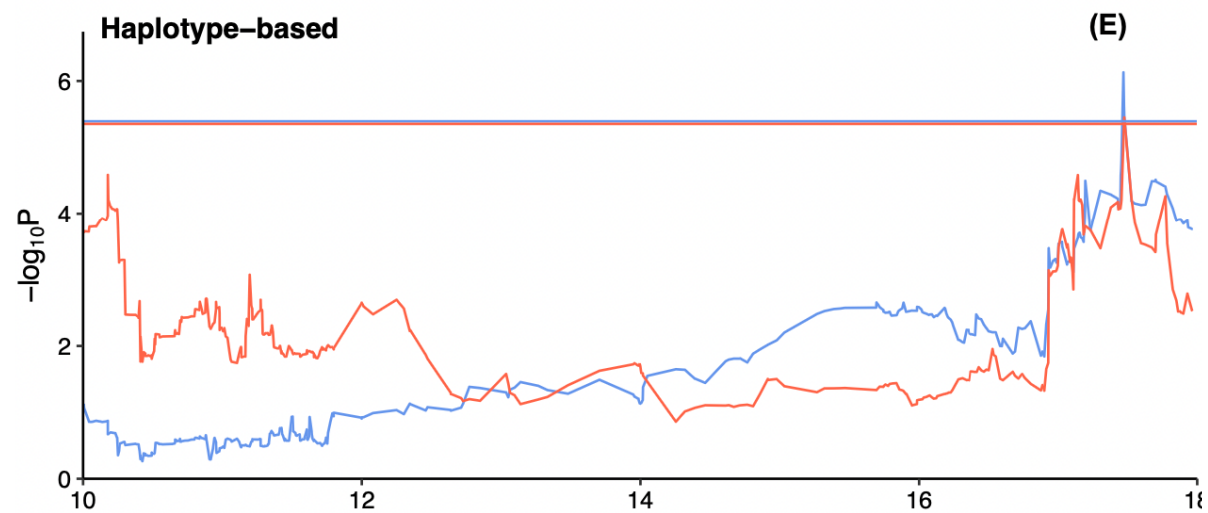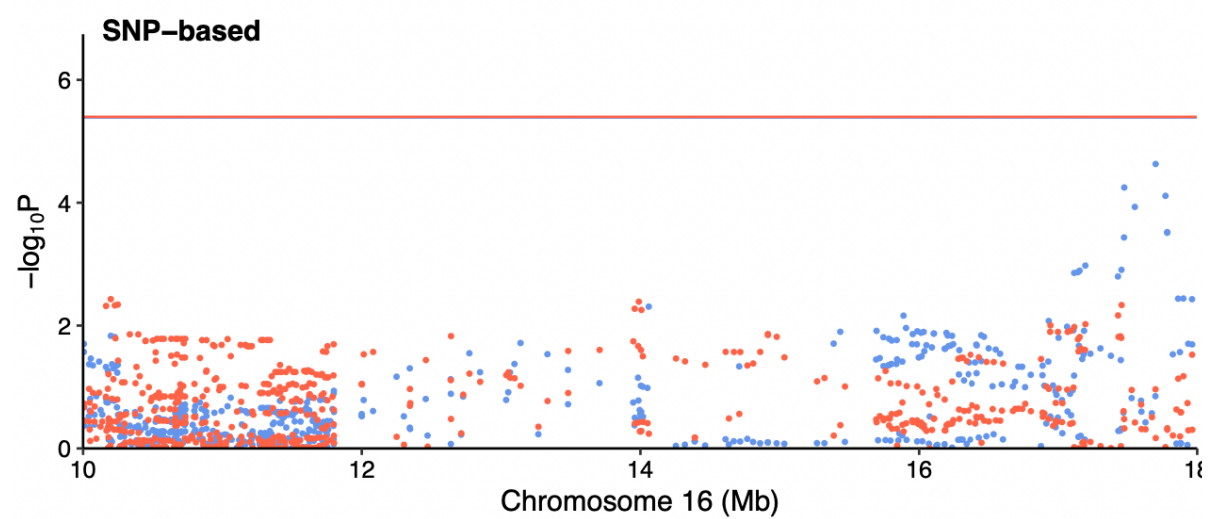

■ BW ■ RetroFat/BWs

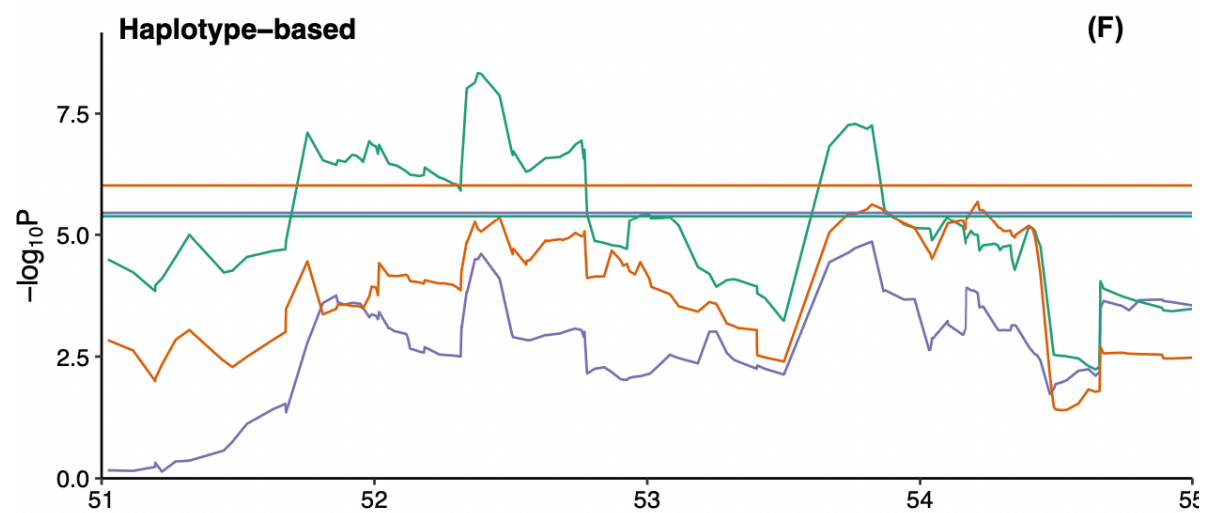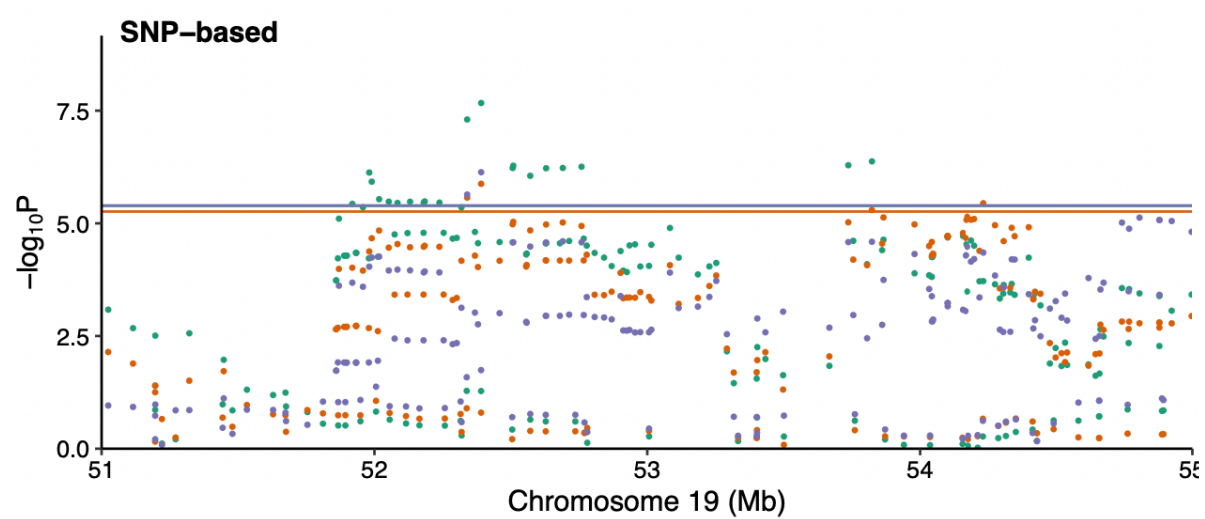

■ BW ■ EpiFat ■ BLNoTail

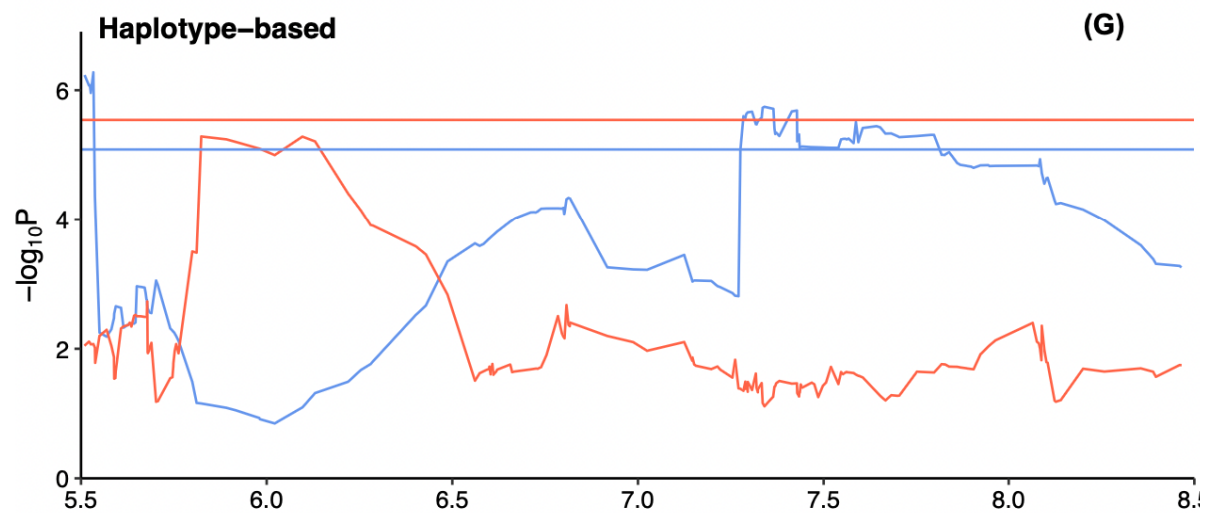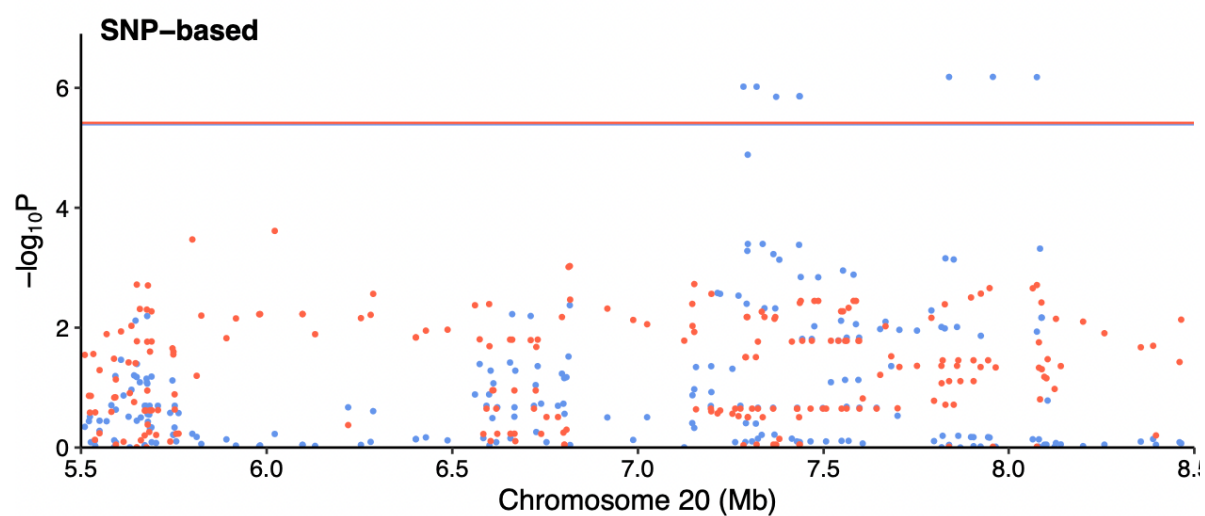

EpiFat/BWs TotKid/BWs
